# Supplementary material for: De novo annotation of the transcriptome of the Northern Wheatear (Oenanthe oenanthe)
Source: PeerJ. 2018 Nov 20;6:e5860. doi: 10.7717/peerj.5860 (PMC6251345; doi:10.7717/peerj.5860)
Supplement: Table S1 — The table includes the gene name (Description), Uniprot IDs, Isogroups, Frequency: number of isotigs/contigs associated to each isogroup, Contig/Isotigs IDs, Transcript length, Transcript sequence, Biological function and Classification according the annotation status: genes with biological function (ann.char.bf), genes annotated without biological function (ann.char), uncharacterized genes (ann.unchar), non-annotated genes (novel.gene). This Transcriptome Shotgun Assembly project (transcripts longer than 199 bp) has been deposited at DDBJ/EMBL/GenBank (www.ncbi.nlm.nih.gov/genbank) under the accession GFYT00000000; the version described in this paper is the first version, GFYT01000000. The raw data can be acceded in the Sequence Read Archive (SRA) database (www.ncbi.nlm.nih.gov/sra), BioProject: PRJNA408074. [file peerj-06-5860-s001.xlsx]

## Sheet: wht.short
Description	Uniprot ID	Isogroups	Freq	Contigs/Isotigs	Transcript length	Transcript sequence	Biological function	Annotation			Description	Protein name
14-3-3 protein beta/alpha	1433B_CHICK	isogroup00153	6	isotig01518	1536	AGCCATGGATAAAAGTGAGTTGGTACAGAAAGCCAAGTTGGCCGAGCAGGCCGAGCGTTATGATGACATGGCTGCTGCTATGAAGGCTGTCACTGAGCAGGGACATGAGCTGTCTAATGAAGAAAGGAATCTCCTCTCCGTGGCCTACAAGAACGTGGTTGGTGCCCGTCGCTCATCCTGGCGCGTGATTTCCAGCATTGAACAGAAAACAGAGAGAAATGAGAAGAAACAGCAGATGGGAAAGGAATATCGTGAGAAAATTGAGGCTGAATTGCAGGATATCTGCAATGATGTTCTGGAACTCCTGGATAAATACCTTATTGTAAATGCCACGCAGCCAGAAAGCAAGGTCTTCTATTTGAAAATGAAAGGTGATTACTACAGATACCTCTCAGAGGT…	cytoplasmic sequestering of protein [GO:0051220]; negative regulation of G-protein coupled receptor protein signaling pathway [GO:0045744]; negative regulation of protein dephosphorylation [GO:0035308]; positive regulation of catalytic activity [GO:0043085]; protein targeting [GO:0006605]	ann.char.bf			Freq	Number of transcripts associated to the corresponding Isogroup
14-3-3 protein beta/alpha	1433B_CHICK	isogroup00153	6	isotig01515	2575	AGCCATGGATAAAAGTGAGTTGGTACAGAAAGCCAAGTTGGCCGAGCAGGCCGAGCGTTATGATGACATGGCTGCTGCTATGAAGGCTGTCACTGAGCAGGGACATGAGCTGTCTAATGAAGAAAGGAATCTCCTCTCCGTGGCCTACAAGAACGTGGTTGGTGCCCGTCGCTCATCCTGGCGCGTGATTTCCAGCATTGAACAGAAAACAGAGAGAAATGAGAAGAAACAGCAGATGGGAAAGGAATATCGTGAGAAAATTGAGGCTGAATTGCAGGATATCTGCAATGATGTTCTGGAACTCCTGGATAAATACCTTATTGTAAATGCCACGCAGCCAGAAAGCAAGGTCTTCTATTTGAAAATGAAAGGTGATTACTACAGATACCTCTCAGAGGT…	cytoplasmic sequestering of protein [GO:0051220]; negative regulation of G-protein coupled receptor protein signaling pathway [GO:0045744]; negative regulation of protein dephosphorylation [GO:0035308]; positive regulation of catalytic activity [GO:0043085]; protein targeting [GO:0006605]	ann.char.bf
14-3-3 protein beta/alpha	1433B_CHICK	isogroup00153	6	isotig01514	2581	AGCCATGGATAAAAGTGAGTTGGTACAGAAAGCCAAGTTGGCCGAGCAGGCCGAGCGTTATGATGACATGGCTGCTGCTATGAAGGCTGTCACTGAGCAGGGACATGAGCTGTCTAATGAAGAAAGGAATCTCCTCTCCGTGGCCTACAAGAACGTGGTTGGTGCCCGTCGCTCATCCTGGCGCGTGATTTCCAGCATTGAACAGAAAACAGAGAGAAATGAGAAGAAACAGCAGATGGGAAAGGAATATCGTGAGAAAATTGAGGCTGAATTGCAGGATATCTGCAATGATGTTCTGGAACTCCTGGATAAATACCTTATTGTAAATGCCACGCAGCCAGAAAGCAAGGTCTTCTATTTGAAAATGAAAGGTGATTACTACAGATACCTCTCAGAGGT…	cytoplasmic sequestering of protein [GO:0051220]; negative regulation of G-protein coupled receptor protein signaling pathway [GO:0045744]; negative regulation of protein dephosphorylation [GO:0035308]; positive regulation of catalytic activity [GO:0043085]; protein targeting [GO:0006605]	ann.char.bf
14-3-3 protein epsilon	1433E_RAT	isogroup01515	2	isotig04990	1690	CGGACCCATCGGCTGCCATCCGCCCCGCGCAGTCCCcGCcGCCGCCCCGCCCGTAGGACATGGACGATCGGGAGGACCTCGTCTATCAGGCCAAGTTGGCTGAGCAGGCTGAGCGCTACGATGAAATGGTTGAATCAaTGAAGAAAGTGGCTGGAATGGATGTGGAGTTGACAGTGGAAGAAAGAAACCTGCTTTCTGTTGCATATAAAAACGTGATTGGAGCCAGGAGAGCTTCCTGGAGAATAATCAGCAGCATTGAACAGAAAGAAGAAAACAAAGGTGGAGAAGACAAATTAAAAATGATTCGGGAATATCGGCAAATGGTTGAGACTGAACTGAAGTTAATCTGTTGTGACATTCTGGATGTACTGGACAAACACCTCATTCCAGCAGCTAACA…	cellular response to heat [GO:0034605]; cerebral cortex development [GO:0021987]; hippocampus development [GO:0021766]; MAPK cascade [GO:0000165]; negative regulation of calcium ion export from cell [GO:1905913]; negative regulation of calcium ion transmembrane transporter activity [GO:1901020]; negative regulation of peptidyl-serine dephosphorylation [GO:1902309]; neuron migration [GO:0001764]; …	ann.char.bf
14-3-3 protein epsilon	1433E_RAT	isogroup01515	2	isotig04989	1736	CGGACCCATCGGCTGCCATCCGCCCCGCGCAGTCCCcGCcGCCGCCCCGCCCGTAGGACATGGACGATCGGGAGGACCTCGTCTATCAGGCCAAGTTGGCTGAGCAGGCTGAGCGCTACGATGAAATGGTTGAATCAaTGAAGAAAGTGGCTGGAATGGATGTGGAGTTGACAGTGGAAGAAAGAAACCTGCTTTCTGTTGCATATAAAAACGTGATTGGAGCCAGGAGAGCTTCCTGGAGAATAATCAGCAGCATTGAACAGAAAGAAGAAAACAAAGGTGGAGAAGACAAATTAAAAATGATTCGGGAATATCGGCAAATGGTTGAGACTGAACTGAAGTTAATCTGTTGTGACATTCTGGATGTACTGGACAAACACCTCATTCCAGCAGCTAACA…	cellular response to heat [GO:0034605]; cerebral cortex development [GO:0021987]; hippocampus development [GO:0021766]; MAPK cascade [GO:0000165]; negative regulation of calcium ion export from cell [GO:1905913]; negative regulation of calcium ion transmembrane transporter activity [GO:1901020]; negative regulation of peptidyl-serine dephosphorylation [GO:1902309]; neuron migration [GO:0001764]; …	ann.char.bf
14-3-3 protein eta	1433F_BOVIN	isogroup07331	1	isotig11720	1531	CCAGCCCGGCAGCCACCACGGAAGCGGCCATGGGggACCGAGAGCAGCTGCTGCAGAGAGCCCGCCTGGCAGAGCAGGCGGAGAGATACGATGACATGGCCTCGGCCATGAAGTCGGTGACTGAGCTGAATGAGCCCCTCTCAAATGAGGATAGGAACCTGCTGTCTGTAGCCTACAAGAATGTAGTCGGAGCTAGGCGATCCTCCTGGCGCGTCATCAGCAGCATAGAGCAGAAGACCATGGCAGATGGGAATGAGAAGAAGCTGGAGAAGGTTAAAGCCTATAGGGAGAAGATAGAAAAGGAGCTTGAGACAGTCTGCAATGATGTTTTGGCTCTCCTAGATAAATACTTGATCAAGAACTGCAATGACTTCCAGTATGAGAGCAAGGTCTTTTACC…		ann.char
14-3-3 protein gamma	1433G_MOUSE	isogroup12852	1	isotig17241	807	GAAGATGGTGGACCGCGAGCAGCTGGTGCAGAAGGCCCGGCTGGCCGAGCAAGCCGAGCGATACGACGACATGGCGGCCGCCATGAAGAACGTGACGGAGCTGAACGAGCCCCTGTCCAACGAAGAGAGGAACCTGCTGTCCGTCGCCTACAAGAACGTGGTGGGGGCGCGGCGCTCGTCCTGGCGAGTCATCAGCAGCATCGAGCAGAAGACCTCTGCGGATGGCAACGAGAAGAAGATCGAGATGGTCCGCGCCTACCGCGAGAAGATCGAGAAGGAGTTGGAAGCGGTGTGCCAGGATGTGCTGAGCCTGCTGGACAACTACCTGATCAAGAACTGCAGCGAGACGCAGTACGAGAGCAAAGTCTTCTACCTGAAGATGAAAGGGGACTATTACCG…	cellular response to insulin stimulus [GO:0032869]; protein targeting [GO:0006605]; regulation of neuron differentiation [GO:0045664]; regulation of synaptic plasticity [GO:0048167]	ann.char.bf
14-3-3 protein sigma	1433S_BOVIN	isogroup12356	1	isotig16745	857	GAGGCTCCCACGGCTCCCGGCCCCGCTGCTCGCCCAAGCGCCCGCGTCCCAGCCATGGCAAGGAACCACCAGGTGCAGAAGGCCAAGCTGGCCGAGCAGGCTGAGCGCTACGAGGACATGGCAGACTTCATGAAGGCGGTGGTGGAGCACGGGGACGAGCTGTCCAACGAGGAGAGGAACCTGCTGTCGGTCGCCTACAAGAACGTGGTGGGCTGCCAGCGCTCGGCGTGGAGAGTCATCTCCAGCATCGAGCACAAAACCGAGGAGGGCGACGACAAAGCGCAGGTGGTGAACGAGTACCGGGAGAAGGTGGAGCAGGAGCTGAACGCCGTCTGCAACAACGTGCTGGGCTTGCTGGACAAGTATCTCATCAAGAAGGACAGCGACACCGAGAGCAAG…	establishment of skin barrier [GO:0061436]; intrinsic apoptotic signaling pathway in response to DNA damage [GO:0008630]; keratinization [GO:0031424]; keratinocyte development [GO:0003334]; negative regulation of cysteine-type endopeptidase activity involved in apoptotic process [GO:0043154]; negative regulation of keratinocyte proliferation [GO:0010839]; positive regulation of cell growth [GO:00…	ann.char.bf
14-3-3 protein theta	1433T_CHICK	isogroup03783	1	isotig08172	2909	AGCCcGGCGGACccAGGTTTTGAGGTGCATTCTCGTGTTGATAGTGTGACATCTCCAGCTTCTTCTGCTACTCCACTGCTCTTGTCCCACTGCCAGCCACCATGGATAAGACCGAGTTGATCCAGAAAGCCAAGCTGGCTGAGCAAGCCGAGCGCTACGATGACATGGCCACCTGCATGAAGGCGGTAACGGAGCAAGGTGCCGAGCTGTCCAACGAGGAGCGCAACCTGCTCTCCGTGGCCTACAAGAACGTGGTGGGgGGgCGGCGCTCGGCCTGGAGGGTCATCTCCAGCATCGAGCAGAAGACAGACACCAGTGACAAGAAGATGCAGCTTATCAAGGACTATCGGGAGAAGGTGGAGTCTGAGCTCAGGTCCATCTGCACCACGGTGCTGGAGC…		ann.char
14-3-3 protein zeta	1433Z_CHICK	isogroup06501	1	isotig10890	1714	ACAGAAATATCAGCATGGATAAAAATGAGCTGGTGCAGAAGGCCAAACTGGCTGAGCAGGCTGAAAGATATGATGACATGGCAAGTTGCATGAAATCTGTGACTGAGCAAGGAGCTGAGTTGTCCAACGAAGAGAGGAATCTTCTCTCTGTTGCCTATAAAAATGTTGTAGGAGCCCGTAGGTCATCTTGGAGAGTCGTCTCAAGTATTGAACAAAAGACGGAAGGCGCTGAGAAAAAACAGCAGATGGCTCGAGAATACAGAGAGAAAATTGAGACTGAGCTAAGAGACATCTGCAATGATGTGCTGTCTCTGTTGGAAAAGTTCTTGATCCCTAATGCTTCGCAAGCAGAAAGCAAAGTTTTCTATTTGAAAATGAAAGGAGACTACTACCGTTACT…	establishment of Golgi localization [GO:0051683]; Golgi reassembly [GO:0090168]; protein targeting [GO:0006605]; regulation of cell death [GO:0010941]	ann.char.bf
1-aminocyclopropane-1-carboxylate synthase-like protein 1	1A1L1_BOVIN	isogroup09142	1	isotig13531	1226	GAGAaGCCCctaCcTCTCTGCTCGTGGCAACTTTGCCAACCTTTTTCAGGGCCCACTGAggAAGGGTACAAAGCCTATCATGCTGACAAGTATGATGAAGAAAAGAACCCCAATGGTATAATAAACTTTGGCACCAGTGAGAACAAGCTCTGCTTTGACCTGATGTCCAAGCGGCTGACACAGGCTGATATGAATGTGATGGATCCTTCACTGCTTCAGTATCCTGACTGGAAAGGACATCTgTTTTTACGGGAAGAAGTGGCTCGATTTTTGACCTATTACTGCAAGGCTCCTGCACCTCTTAAAGCAGACAATGTGATTGTTTTAAATGGTTGTGGCTCTTTATTTTCTGCATTAGCTACAGTCCTTTGTGATCCAGGGGAAGCTGTTCTGATTGCT…	biosynthetic process [GO:0009058]	ann.char.bf
Serine/threonine-protein phosphatase 2A 56 kDa regulatory subunit alpha isoform	2A5A_HUMAN	isogroup04080	1	isotig08469	2660	gTGGTGTGTGAGGGCAGCCAGGACTTCGTTTttGGTGGTGgTTTTttGCTGTTTTTtttttAAATTTTttttAaGCCCcTTtGTTTtttGCCcGCCcGCTTCTCCCTCCGGTGCAATATATGCTCGTGGAGAgCCGCCCCgCCGCCCAGCcaTGTCGGCGGCCATCTCTGCCGCGGAGAAGGTGGATGGCTTCACACGGAAATCGGTGCGCAAGGCGCAGAGGCAGAAGCGCTCGCAGGGCTCCTCGCAGTTCCGCAGCCAGGGCAGCCCGGTGGAGCTGTCGCCGCTGCCCCAGCTCAAAGATGCCACCTTCAATGAACAGCAAGATCTTTTTTGTCAGAAGTTGCAACAGTGTTGTGTGCTCTTTGACTTCATGGACTCTGTTTCAGACCTGAAAAG…	negative regulation of establishment of protein localization to plasma membrane [GO:0090005]; negative regulation of lipid kinase activity [GO:0090219]; positive regulation of protein dephosphorylation [GO:0035307]; signal transduction [GO:0007165]	ann.char.bf
Serine/threonine-protein phosphatase 2A 56 kDa regulatory subunit delta isoform	2A5D_HUMAN	isogroup07270	1	isotig11659	1545	AGGATGgTGGGGCTGAGAATTCAGAAGAGGCCCAGCAGCCTCAGCAGCAGCCGCAGCAGTCACAGCAGCAGACACAACAACAGCCAACTTCAAATAAGCGGCCCAGTAACAGTGCTCCcccccAaCCCAGCTGAATAAAaTCAAGTACTCAGGGGGACCCcAGATTGTGAAGAAGGAGCGCCGGCACAGCTCTTCCCGTTTCAATCTGAGCAAAAACCGGGAACTGCAAAAACTCCCAGCCCTCAAAGATGCTCCTCCACATGAACGAGAAGAGCTTTTCATCCAGAAGCTGCGGCAGTGCTGCGTtCTTTTTGATTTCATCTCTGACCCCCTCAGTGACcTGAAGTTCAAGGAGGTGAAGCGAGCAGGTCTCAATGAGATGGTGGAATACATCACACA…	nervous system development [GO:0007399]; signal transduction [GO:0007165]	ann.char.bf
Serine/threonine-protein phosphatase 2A 56 kDa regulatory subunit epsilon isoform	2A5E_BOVIN	isogroup02570	1	isotig06959	5411	GCCGCCTCCcTCCGTCTCCGGCTTCTCTACCAGGAGCGCCAaGGGATATGTCCTCAGCACCAACTACTCCTCCATCAGTGGATAAAGTAGACGGATTTTCTCGGAAGTCCGTCAGAAAAGCCAGACAGAAGAGGTCACAAAGCTCCTCCCAGTTTAGGTCTCAGGGCAAGCCTATCGAGTTAACTCCCcTGCCTCTGCTAAAAGACGTTCCATCTTCAGAGCAGCCTGAATTGTTCCTAAAGAAACTTCAACAGTGCTGTGTCATTTTTGACTTCATGGACACGCTTTCAGACCTTAAAATGAAAGAATACAAGCGCTCCACTCTTAATGAACTGGTGGACTACATTACAATAAGCAGAGGCTGTTTGACAGAGCAGACTTACCCTGAAGTAGTTAGAA…	signal transduction [GO:0007165]	ann.char.bf
Serine/threonine-protein phosphatase 2A 56 kDa regulatory subunit gamma isoform	2A5G_HUMAN	isogroup01030	2	isotig04019	4126	AGAAAGAACCTGCAAAATCAGTCAAGAGTGGAAAAAGTGGCAAAGATGCACAAGATAACCAAGAACATGAGGTGTCAAACAAAAAGTCAAATAGCACTCCTCCCCcGGcACAACTATCTAAAaTCAAAGTACCAGCACCACAGACTGTAGTGAAGAAGGAAAAGCGTCAGAGTTCTTCAAGGTTTAATGTTAGCAATAACAGGGAGCTTCAAAAACTGCCAGCTTTAaaaGATGTTCCTCCAGCGGATCAAGAAAAGCTTTTTATCCAGAAGTTACGACAATGTTGTGTACTTTTTGACTTTGTTTCTGATCCACTAAGTGACCTAAAGTGGAAGGAAGTAAAACGAGCAGCTTTAAGTGAAATGGTAGAATATATCACACACAATCGCAATGTGATTA…	DNA damage response, signal transduction by p53 class mediator resulting in cell cycle arrest [GO:0006977]; intrinsic apoptotic signaling pathway in response to DNA damage by p53 class mediator [GO:0042771]; negative regulation of cell proliferation [GO:0008285]; proteasome-mediated ubiquitin-dependent protein catabolic process [GO:0043161]; regulation of phosphatidylinositol 3-kinase signaling […	ann.char.bf
Serine/threonine-protein phosphatase 2A 56 kDa regulatory subunit gamma isoform	2A5G_HUMAN	isogroup01030	2	isotig04020	4062	GTcTTTTTTttAaCTAAAATGGAGGCTGGTTTCTTGCCTtAAGGAATACAGTGTCGTGCCTGCTGGAGCCTAGATGTTGACATGTAACAGAGCTGGCAGCAGGATGGTGGTTGACGCAGCCAATTCCAATGGGCCGTtCCAGCCCGTGGCCCTTTTGCATATTAGAGATGTTCCTCCAGCGGATCAAGAAAAGCTTTTTATCCAGAAGTTACGACAATGTTGTGTACTTTTTGACTTTGTTTCTGATCCACTAAGTGACCTAAAGTGGAAGGAAGTAAAACGAGCAGCTTTAAGTGAAATGGTAGAATATATCACACACAATCGCAATGTGATTACGGAACCTATTTACCCTGAAGTAGTACATATGTTTGCAGTTAATATGTTTCGAACATTACCACC…	DNA damage response, signal transduction by p53 class mediator resulting in cell cycle arrest [GO:0006977]; intrinsic apoptotic signaling pathway in response to DNA damage by p53 class mediator [GO:0042771]; negative regulation of cell proliferation [GO:0008285]; proteasome-mediated ubiquitin-dependent protein catabolic process [GO:0043161]; regulation of phosphatidylinositol 3-kinase signaling […	ann.char.bf
Serine/threonine-protein phosphatase 2A 55 kDa regulatory subunit B alpha isoform	2ABA_MACFA	isogroup05322	1	isotig09711	2073	GCCGCTATCGCCAGCACAATATGGCAGGAGCTGGAGGAGGAAATGACATTCAGTGGTGTTTTTCTCAGGTGAAAGGCGCTGTAGATGATGATGTAGCAGAAGCGGATATAATTTCTACAGTAGAGTTTAACCATTCTGGAGAGTTGTTAGCAACAGGAGACAAGGGAGGCAGAGTTGTCATTTTTCAACAGGAGCAGGAGAACAAAACCCAGTCTCACAGTAGAGGAGAATACAATGTTTACAGTACCTTTCAAAGCCATGAACCAGAGTTTGACTACTTGAAAAGTTTAGAAATTGAAGAGAAGATCAACAAAATTAGGTGGTTACCCCAGAAAAATGCTGCTCAGTTTTTATTGTCTACAAATGATAAAACAATAAAGTTATGGAAAATCAGTGAAA…		ann.char
Serine/threonine-protein phosphatase 2A 55 kDa regulatory subunit B beta isoform	2ABB_MACFA	isogroup08700	1	isotig13089	1288	GTAAGATCAGCAGCAGTTTCCTGCGGGATCACAGCTATgCCACAGAAGCTGACATCATCTCcACAGTTGAGTTCAACCACACTGGAGAGTTGCTGGCAaCAGGGGACAAGGGGGgCCGGgTTGtAATATTCCAGCGtGAGCAGGAGAGCAAGAACCaGccccACCGcAGGGGaGAGTACAATGTCTACAGCACCTTCCAGAGCCACGAGCCGGAGTTCGATTACCTGAAGAGCCTGGAgATCgaGgAGAAgATCAAcAaGATCCGATGGCTGCCGCAGCAGAACGCGGCGTATTTCCTGCTCTCCACCAACGATAAGACCGTCAAGCTCTGGAAGGTCAGCGAGAGGGACAAGAGgCCGGAGGGGTACAACcTCAAGGATGAGGAGGGGCGTCTGCGAG…		ann.char
3 beta-hydroxysteroid dehydrogenase type 7	3BHS7_HUMAN	isogroup00343	3	isotig02279	867	TGGGCCCGgCCGGGCTGCGcTCGGGGGgTCCCcGgCTCCCcAAAACCCTCCTGGGGGCTCTGGCCCGGCTCAACGGGGTGTTGAGGAGGATTTTGGGGGcGCTGGGGGCGGGTTTTGCCCCTTTGTTGAACCCCTACACGTGGGCGGTGGCCAGCACCCCGTTCACGGTCAGGAGCCGAAAAGCGCTGGAGAAATTGGGGTACCGGCCCCTGTTCTCGTGGGAGGAGGCGcGGGAGAGGACGGTGGGGTGGGTGAGGGGGTTGGAgGGGGCGTGAAGGGGggtAAAAAaGGGGGGAAAtGGGAGGAAATGGGAAAAAACGGGGAGAGAATGGGGAAAAATGGGGAGGAAATGGGAAAAAAaGGGGAGAGAATGAGAAAAAATGGGGGgAAAaTGGGGAG…	B cell chemotaxis [GO:0035754]; bile acid biosynthetic process [GO:0006699]	ann.char.bf
3 beta-hydroxysteroid dehydrogenase type 7	3BHS7_HUMAN	isogroup00343	3	isotig02280	845	TGGGCCCGgCCGGGCTGCGcTCGGGGGgTCCCcGgCTCCCcAAAACCCTCCTGGGGGCTCTGGCCCGGCTCAACGGGGTGTTGAGGAGGATTTTGGGGGcGCTGGGGGCGGGTTTTGCCCCTTTGTTGAACCCCTACACGTGGGCGGTGGCCAGCACCCCGTTCACGGTCAGGAGCCGAAAAGCGCTGGAGAAATTGGGGTACCGGCCCCTGTTCTCGTGGGAGGAGGCGcGGGAGAGGACGGTGGGGTGGGTGAGGGGGTTGGAgGGGGCGTGAAGGGGggtAAAAAaGGGGGGAAAtGGGAGGAAATGGGAAAAAACGGGGAGAGAATGGGGAAAAATGGGGAGGAAATGGGAAAAAAaGGGGAGAGAATGAGAAAAAATGGGGGgAAAaTGGGGAG…	B cell chemotaxis [GO:0035754]; bile acid biosynthetic process [GO:0006699]	ann.char.bf
3 beta-hydroxysteroid dehydrogenase type 7	3BHS7_RAT	isogroup00343	3	isotig02281	612	TGGGCCCGgCCGGGCTGCGcTCGGGGGgTCCCcGgCTCCCcAAAACCCTCCTGGGGGCTCTGGCCCGGCTCAACGGGGTGTTGAGGAGGATTTTGGGGGcGCTGGGGGCGGGTTTTGCCCCTTTGTTGAACCCCTACACGTGGGCGGTGGCCAGCACCCCGTTCACGGTCAGGAGCCGAAAAGCGCTGGAGAAATTGGGGTACCGGCCCCTGTTCTCGTGGGAGGAGGCGcGGGAGAGGACGGTGGGGTGGGTGAGGGGGTTGGAgGGGgCGTGAAGGGGggtAAAAAaGGGGGGgAAAtGGGAGGAAATGGGAAAAaaCGGGGAGAGAATGGGAAAAAAaGGGGAGAAAaTACGAAGGAATGGTGGAAAAaTGGAAAAAaCGGGGAGGAAATGGGAAA…	B cell chemotaxis [GO:0035754]; bile acid metabolic process [GO:0008206]; cholesterol catabolic process [GO:0006707]; liver regeneration [GO:0097421]; regulation of cell growth [GO:0001558]; steroid biosynthetic process [GO:0006694]	ann.char.bf
SH3 domain-binding protein 2	3BP2_HUMAN	isogroup04303	1	isotig08692	2526	TGAGAAGAGAAATTGGtCaCTACCATGACAAGAAagAAACaTtAATAGAATTTAGTGACTCTGgTTCTGATGCAGACAGTTTcTATGGCTCAGTAGAACGTCCCATTGACATCAAGTATTCCCATCATTCAGCAGATAATGAAGATTATGACCAGGAaGAAGAGGATGAGTCTTaTTTGCAGCCGGATACTTCTGACATAGTGAAAGATGATATGGTCCTGCCCCCTGCATACCCACCTCCGCCCGTTCCTCACGTCAGGAAATCTGCCTTAGAAGCGAGGGCACACTCCTACTCTGGCAAACCAACTGCACCAGTGCCACCACCACCTCCAAAGAGAAGCTTGCCTGAAATCAAGCTGGAGCCTCCCCCTGTGCCCCCTCTACCTGTGTTCAAAAaGC…	signal transduction [GO:0007165]	ann.char.bf
SH3 domain-binding protein 5	3BP5_HUMAN	isogroup04374	1	isotig08763	2491	GCAGCAGCGGGATCGGCGGCGGGAGCAGCGGGAGCCGCCATGGAGCCGCCGCGGCCCGAGGACGAGGAGGTGGATCCCCGCATCCAGGGGGAGCTAGAAAAACTGAATCAATCCACAGATGATATCAATCGCAGAGAGACGGAGCTGGAGGATGCACGCCAGAAGTTCCGCTCTGTGCTGGTCGAGGCAACTGTAAAACTGGATGAACTGGTGAAGAAGATTGGAAAAGCTGTAGAAGACTCTAAACCTTACTGGGAAGCTCGGAGGGTGGCCAGGCAGGCACAGCTGGAGGCTCAGAGGGCGACTCAGGACTTTCAGAGGGCCACGGAGGTGCTGCGTGCTGCCAAGGAGACCATTTCTCTGGCAGAGCAGAGGCTGCTGGAGGATGACAAGCGTCAG…	intracellular signal transduction [GO:0035556]; negative regulation of protein tyrosine kinase activity [GO:0061099]; signal transduction [GO:0007165]	ann.char.bf
SH3 domain-binding protein 5-like	3BP5L_BOVIN	isogroup16487	1	isotig20876	491	AGGCGGAGCaGGAGCGgCTCTGGAGCGAGAGGgAgcACcAGAGGGTgACcAGGCTgTGCcAGGAGGCcGAGGCCGAGGTGCAGCGGCTGCAGAAATCCCTGAGGCGCGACATCGCCCGCAGCCGGCCCTACTTCGAGCTGAAGGCCCAGTTCAACCAGAGGCTGGAGGAGCACAAATCCCGCGTGAATTCCCTGGAATCCGCCGTCTCCCAGGCCAAGCTCCGTTATTCCGTGGCCCTGCGGAATTTGGAGCAGATCAGCGAGGAGATCCACGCCCGAAGATTCCAGAGAATCCTCCGGAAAAAaCATCGGGAAAACCCCcTGGGAGCCGAGGGGgggCCCcAAAaCgTtGAAAaTCCCGgAATTCCGGGCGAAATCAGCAGAATTCCTGGtGAAAtCc…	intracellular signal transduction [GO:0035556]; negative regulation of protein tyrosine kinase activity [GO:0061099]	ann.char.bf
SH3 domain-binding protein 5-like	3BP5L_BOVIN	isogroup00930	2	isotig03834	472	TGAAATCCGCGGAATTTCGGgTGAAACCAGCGGgATTCCCGgAATTCCcGAGGGGACGGGCGGGAATTCCGAGGAATCCcGGGCCcGGGAATTTCGGGAaTTtCGGATTCCGGGGATTCTCTGTCGGTGCTGAGCCTCcAGACCATCGCCTCGGACCTGCAGAAGTtCGACTCGGTGGAACATTTGtCGGGAATTCCGGGAaTTTCGGGAATCGCCGaCGCCCTGaGCCTGcACAGCGAGGAGCTGGGGGAGGAGAGGGAGAAGCGCcGGAATTTTCGGCACcACCGGAGCGTCAGCCTCTGAAAATTTTTTTtGGGGTTTTTTTTTtttttcTTTGGGAGGgAGGACGTTTtGGGATTTtGGGGAGAAATCCTgaagaaTCTCAAGGAAaTTCCCcAA…	intracellular signal transduction [GO:0035556]; negative regulation of protein tyrosine kinase activity [GO:0061099]	ann.char.bf
SH3 domain-binding protein 5-like	3BP5L_BOVIN	isogroup00930	2	isotig03835	450	TGAAATCCGCGGAATTTCGGgTGAAACCAGCGGgATTCCCGgAATTCCcGAGGGGACGGGCGGGAATTCCGAGGAATCCcGGGCCcGGGAATTTCGGGAaTTtCGGATTCCGGGGATTCTCTGTCGGTGCTGAGCCTCcAGACCATCGCCTCGGACCTGCAGAAGTtCGACTCGGTGGAACATTTGtCGGGAATTCCGGGAaTTTCGGGAATCGCCGaCGCCCTGaGCCTGcACAGCGAGGAGCTGGGGGAGGAGAGGGAGAAGCGCcGGAATTTTCGGCACcACCGGAGCGTCAGCCTCTGAAAAttttttttttGgAGGGAGGAGGTTTTGGGATTTtGGGGAGaagTCTTGGAAATCTCAAGGAAaTTCCCcAAAAAaTTTCCTGGAAATCACAAG…	intracellular signal transduction [GO:0035556]; negative regulation of protein tyrosine kinase activity [GO:0061099]	ann.char.bf
3-hydroxyanthranilate 3,4-dioxygenase	3HAO_HUMAN	isogroup05491	1	isotig09880	2011	GAGCACTGGGgTTGGAATCACAGgCAgtctGTCTGCTCACAGAAAAAGCACTCTGCAAATTCTAATCTCTCAGGCAAAAGTTTCATAGgTGGTGGACGATGGAGCTTCTTGTGAATGTAAGAAAATGGATAGAAGAAAACAAAACTGCCTTTTTGCCACCTGTTTGCAATAAGCTTATGCATCGCTATCAATTAAATGTGATGTTTGTTGGAGGGCCAAATGAAAGGAAGGATTATCATATTGAAGAAGGAGAAGAGCTTTTTTACCAGGTTCAAGGAGATATGTGTTTAAAGATAATtGAAAATGGGAGACAAAAAGACGTTGTCATCCGAGAGGGGGAGATGTTCCTGCTACCTGCCAGGATACCTCACTCTCCTCAGAGATATGAAAACACTGTGG…	NAD biosynthetic process [GO:0009435]; neuron cellular homeostasis [GO:0070050]; quinolinate biosynthetic process [GO:0019805]; response to cadmium ion [GO:0046686]; response to zinc ion [GO:0010043]; tryptophan catabolic process [GO:0006569]	ann.char.bf
DNA-3-methyladenine glycosylase	3MG_HUMAN	isogroup09531	1	isotig13920	1165	AGGGgCTGCGCGCGCCCCGCCCGcGGCGGGAaCGGGCCCGGCAGAAGGAcGAGTTAATTTTCATCCCAAAAAAGCTCAAGATGCCcTTtAGGGAGTAGGAGCGAGGACTTGAATTGCAAGGAAATGAGATCCCCAGCACTTAGTAAGGTAAAAGGACTGCAGCACTGAAAACAAAACACCAGCTTTTTGGCTCTCACATAGGAAAGTGGTGGCAAACCAGAAGAACAGTTGCTTATGATGTAGTTGCCTCAGGTCCATGTTGTTGGCTGGAACAGGAgGCTGAATCTTGCTGAACTATGCCAAGAAAAaGAAAGCTGTTGGCTCAATTAAATGCTCTTCAAAACACCACCAGCTTCCCTCAGATCTGTGCTGTGGAGCAGCTGAACACTACACCTGGAG…	base-excision repair [GO:0006284]; depurination [GO:0045007]; DNA dealkylation involved in DNA repair [GO:0006307]	ann.char.bf
Protein 4.1	41_BOVIN	isogroup00456	3	isotig02715	5591	GCcGGGAACTTCGGGAGCGTGCGGGCGCCAGCGGCCGTGCGGCGGGCAGGCAAGGAAGATACTGTGCTGTTATCCAGTTGTCATAGTTGATTTCATTCTACAAATCTTCAAGATTCCTACTGGAGTGAAAGTGTCAGTTGTGATAATGACAACTGAAGTTGGTTCAGAGACCGAAGTAAAGAAAGATTCTGAGCAGCTGGGACCAGACAAAGCCAAGGACAAGCCTGAAGAAGCATCAGAGACTCCGGAAGATCAAAAGTCCAGGGAAACATCATCTGGAGAAGCTCAAGATTCTTCTGccccAGCACCAACTAGCCAAAGTAGTCCAAATAGCCAGAAGAAGGAAAAATCTTCACCTGAAAGCAAGGGTATTTCTCGTTTCCTTCCCCCTTGGCTTAA…	actomyosin structure organization [GO:0031032]; cortical actin cytoskeleton organization [GO:0030866]; positive regulation of protein localization to cell cortex [GO:1904778]	ann.char.bf
Protein 4.1	41_BOVIN	isogroup03627	1	isotig08016	3006	CAGGCATAGCAATTtAaTGTTGGAGGACCTAGATAAGACGCAGGAAGAAATAAAGAAGCACCATGCCAACATCAGCGAGCTGAAGAAGAACTTCATGGAGTCGGTCCCCGAGCCTCGGCCGAGCGAGTGGGACAAGCGTCTGTCCGGCCACTCCCCGTTCCGCAGCCTCAACGCCAACGGGCAGATcCCCTCGGCGGCCGACGGCCCCCCGCTAGTGAAGACACAGACTGTCACCATCTCGGATGTGTCCAGCGCCATcAAAAGTGAAATTCCCACAAAaGAAGTCCCTATTGTCCACACGGAGACCAAGACCATCACCTACGAAGCTGCACAGACAGATGGTGGCAATGGGGATTTaGACCCTGGCATCCTGCTGACTGCCCAGACCATCACTTCAGA…	actomyosin structure organization [GO:0031032]; cortical actin cytoskeleton organization [GO:0030866]; positive regulation of protein localization to cell cortex [GO:1904778]	ann.char.bf
Eukaryotic translation initiation factor 4E-binding protein 1	4EBP1_BOVIN	isogroup16234	1	isotig20623	522	GCGACTACAGCACCACGCCGGGgggCACCGTGTTCGGgACCACGCCGGGCGGTACCAGGATTATTTATGACCGCCAGTTTTTGATGGAATGCCGCAATTCCCCGGTTGCCAAAACTCCTCCCTCCGACCTTCCCGACATTCCAGGgGTGACCAGCCCCAGCGGGGAGGAGCTGAAGCTTGAAAACCACCACGTCCAAAGCTGTGAGGAGAAAGTGAGCACAGGTGAGGAAGAGCAGTTTGACATGGACATCTAAGACACCTGCCTGGGGAGTGCTGGTCCAGTGAAGCACCAGAACTTGTTGTGAGGATTCCCACCAGCCAGGCTCACAGCAGCCATGCCTTGAGTGCCTTCCTGCTCCTGGGAGAGGCAGATTCCCTCGGGGGAGCAGAGCAGTCCTG…	cellular response to dexamethasone stimulus [GO:0071549]; G1/S transition of mitotic cell cycle [GO:0000082]; insulin receptor signaling pathway [GO:0008286]; IRES-dependent translational initiation [GO:0002192]; negative regulation of translational initiation [GO:0045947]; positive regulation of mitotic cell cycle [GO:0045931]; TOR signaling [GO:0031929]	ann.char.bf
Eukaryotic translation initiation factor 4E-binding protein 2	4EBP2_HUMAN	isogroup07504	1	isotig11893	1491	ACTGCACCACCCCcGGCGGGACGCTCTTCTCCACCACGCCGGGAGGCACCCGGATCATCTACGACCGCAAGTTCCTGCTGGACCGCCGCAACTCCCCCATGGCCAAGACCCcGCCTTGTCACCTCCCcAATATTCCCGGCGTCACCAGCCCCGGCGAGCCCGGCGAGGAGCCCAAAGCGGACGCCAACAGCTTGAACCACCAGGAGAACAAGCCATCCATGGGGGACGATGCTCAGTTCGAGATGGATATCTGAGCGGGAACCACGGAGAGGCAGCGACTCCCcAGCCCTGTGCACCCCCcGTTCGGCTCAGCAGGATCCGTCCCGGCGAGGTGGAGGTGGCAGAGGTCCCCACCaggTCCCCTCCCCGCCCTCCTCCTCCCCCTCTTTtCTGGGGGgA…	cAMP-mediated signaling [GO:0019933]; insulin receptor signaling pathway [GO:0008286]; memory [GO:0007613]; modulation of synaptic transmission [GO:0050804]; negative regulation of translational initiation [GO:0045947]; regulation of synaptic plasticity [GO:0048167]; social behavior [GO:0035176]; TOR signaling [GO:0031929]; translation [GO:0006412]	ann.char.bf
Eukaryotic translation initiation factor 4E transporter	4ET_HUMAN	isogroup04152	1	isotig08541	2615	agAgggaCTGGCACTCCcACATGACTTGGCTATACATGCAGCAAATTTCTATCAGCATGGCTTTGGTAAACCACAAatGGACAAAAGCAGAGATGGCTACAGAAACAGGCAGCAGCGAGTGACTAAATCCCcTGCCCcAGGACACAGAGGGAATGCaTCTTCTCCAGCCCcTGCAGCATCCATCACAAGCATGCTGTCTCCTTCCTTCACACCTACCTCGGTGATACGCAAGATGTATGAGAGCAAGGAGAAAAGCAAAGAGGATCCAGTTTCTGGGAAAATGAAAATCAGTGATGTTAAAGATGAAAATCAGAGACCAAATGAAGGTACCAAACTACCTGCACTGCAACGCTCTGCATGTTCCACACCTCTTACCCAAGCAAATCGTTGCACCAAAGA…	negative regulation of neuron differentiation [GO:0045665]; negative regulation of translation [GO:0017148]; stem cell population maintenance [GO:0019827]	ann.char.bf
5-hydroxytryptamine receptor 1B	5HT1B_CANFA	isogroup04128	1	isotig08517	2625	GAAaCTGTAGcGCCGAGGAAGTGATTTACCAaGATGCCACCCCCCTCtCCGTgAaGATCGTGCTCGCCGTCGTCCTGGCGCTGGTCACCCTGGCCACGGTGCTTTCCAaCGCCTTtGTCATCGCCACGGTCTACCAGACGAGGAAACTCCACaCGCCGGCCAACTACCTGATCGCCTCGTtGGCCGTCACcGACCTCCTCGTCTCCATCCTCGTCATGCCCATCAGCACCATGTACACTGTGACCGGCAAGTGGACGCTGGGTCAGATCGTCTGCGATATCTGGCTGTCCTCGGACATCACCTGTTGCACGGCGTCCATCCTGCACCTCTGTGTCATCGCCCTGGACCGCTACTGGGCGATCACCGACGCCGTCGAGTACTCCACGAAACGGACTCCcA…	adenylate cyclase-inhibiting serotonin receptor signaling pathway [GO:0007198]; bone remodeling [GO:0046849]; cellular response to alkaloid [GO:0071312]; cellular response to drug [GO:0035690]; chemical synaptic transmission [GO:0007268]; feeding behavior [GO:0007631]; negative regulation of serotonin secretion [GO:0014063]; regulation of behavior [GO:0050795]; vasoconstriction [GO:0042310]	ann.char.bf
5-hydroxytryptamine receptor 1D	5HT1D_PIG	isogroup10812	1	isotig15201	1013	CAAGCGCCGcACGgCTGGCCGGGCAGCCcTCATGGTGGCCGTGGTCTGGATCaTTTCTGTcAGCaTCTCTgtGCcACCcTTTTTCTGGAGgCAaGTGAAAGCTCCTGAAGAAaTCGcaaaGtGCGCCGTGAACACGGATcAAATTTCCTACACCATTTATTCCACCTGTGGGGCTTtCTACATCCcAaCCGTGCTCCTCCTGATACTGTACGGCAGAaTTTAtGCAGCAGCTCGCTCcAGgATCCTGAAaCCTCCCCcTTTGTATGGgAAaCGTTTTaCTACTGCCCACCTGaTTGCTGGTtCTGCAGGCtCTTCCCTCTGCTCcATCAaTGCCaGCCTCCATGAAGGGCATtCCCATGCAGATGGATCCCcAATaTttATTGGTCATGTTAAAATAAA…	adenylate cyclase-inhibiting G-protein coupled receptor signaling pathway [GO:0007193]; chemical synaptic transmission [GO:0007268]; regulation of behavior [GO:0050795]; regulation of locomotion [GO:0040012]; smooth muscle contraction [GO:0006939]; vasoconstriction [GO:0042310]	ann.char.bf
5-hydroxytryptamine receptor 1F	5HT1F_HUMAN	isogroup08813	1	isotig13202	1271	AAGAAAGCTCCACCACCCCGCCAACTATCTCATCTGCTCTCTTGCAGTGACTGACTTCCTTGTGGCAATCCTGGTGATGCCCTTCAGCATTGTCTACATTGTAAAGGAGACCTGGATCATGGGGCAGGTGgTGTGTGACATTTGGCTGAGTGTGGACATCACGTGCTGCACTTGCTCCATCTTGCACCTCTCTGCCATAGCTTTGGACCGGTACAGAGCAATCACGGATGCCGTGGAATAcGCCCGGAAAAGGACACCTAAGCATGCTGGCATCATGATAGCAGTTGTATGGATCATATCCATTTTTATCTCCATGCCACCTTTGTTTTGGAGGCACCAGACCACCAGCAGGGAGGACGAaTGCATCATCAAACACGACCACATCGTCTCCACCATTTA…	adenylate cyclase-inhibiting G-protein coupled receptor signaling pathway [GO:0007193]; chemical synaptic transmission [GO:0007268]; G-protein coupled receptor signaling pathway, coupled to cyclic nucleotide second messenger [GO:0007187]	ann.char.bf
5-hydroxytryptamine receptor 2C	5HT2C_CANFA	isogroup01714	2	isotig05388	686	GATCTGCTTCACTATGGAAGATGAAATGATTTTCTGGCTCAGGTGTTGTGATGTTCGGCATCTGCCTTGGACCTGGAATTTGGAAAAGGGATCGTCTCTGAGGCACGGATAaGAGACaGAGAAaCCAGCCCcAGACAaTGAGCACTTtAAGTAGCACTGGAATATTACTCAGCTTAACAACAGTGTCTGTTACACTGGATTTTAGTTTGCATGGTGGTCTGATGGCTTGGTCCTTAAGCAGCAATTTGACTCTGAACCAGAGTTTGCCTACGTCcGATCCTCTCAaCACCTCTGAGAAGGGCGAaGCCTCTCGGGTGTCCGTGAGGGAGAaGAATTGGCCAGCCCTCCTGATCCTGGTAGTCATCCTGCTGACCATTGGGGgCAaCATACTGGTAATTA…	behavioral fear response [GO:0001662]; feeding behavior [GO:0007631]; locomotory behavior [GO:0007626]; phospholipase C-activating G-protein coupled receptor signaling pathway [GO:0007200]; phospholipase C-activating serotonin receptor signaling pathway [GO:0007208]; positive regulation of cytosolic calcium ion concentration involved in phospholipase C-activating G-protein coupled signaling pathw…	ann.char.bf
5-hydroxytryptamine receptor 2C	5HT2C_CANFA	isogroup01714	2	isotig05387	1940	GATCTGCTTCACTATGGAAGATGAAATGATTTTCTGGCTCAGGTGTTGTGATGTTCGGCATCTGCCTTGGACCTGGAATTTGGAAAAGGGATCGTCTCTGAGGCACGGATAaGAGACaGAGAAaCCAGCCCcAGACAaTGAGCACTTtAAGTAGCACTGGAATATTACTCAGCTTAACAACAGTGTCTGTTACACTGGATTTTAGTTTGCATGGTGGTCTGATGGCTTGGTCCTTAAGCAGCAATTTGACTCTGAACCAGAGTTTGCCTACGTCcGATCCTCTCAaCACCTCTGAGAAGGGCGAaGCCTCTCGGGTGTCCGTGAGGGAGAaGAATTGGCCAGCCCTCCTGATCCTGGTAGTCATCCTGCTGACCATTGGGGgCAaCATACTGGTAATTA…	behavioral fear response [GO:0001662]; feeding behavior [GO:0007631]; locomotory behavior [GO:0007626]; phospholipase C-activating G-protein coupled receptor signaling pathway [GO:0007200]; phospholipase C-activating serotonin receptor signaling pathway [GO:0007208]; positive regulation of cytosolic calcium ion concentration involved in phospholipase C-activating G-protein coupled signaling pathw…	ann.char.bf
5-hydroxytryptamine receptor 7	5HT7R_XENLA	isogroup13473	1	isotig17862	751	ACTCTGCTCTGGCTGGGCTACACCAACTCCCTCATCAACCCCcctATCTaCGCCTTCTtCAACCGGGATTTGAGGACTACTTTCTGGAACCTGCtGCGCTGCAGGTACAGGAACATCAACAGGAGGCTGTCGGCCGCCAGCATGCACGAGgCGCtGAAAGCCACGGAGAGGCACGAGTGCATCcTGTAGTGCCTGAtCCCGGCTCCTGCcTCTCTTCCTCGCTTCCCTGgCCTCCcAGgAGCCGTCCAGACATTGTCACTGGGAGTGACACCCcgTGGGGAGCCGCTGTTTTCCTCACCCTGGGAACAAGcGGAGGgAATtggggAGCAGCccTTCCTTCTCatTCTGCTCCAaGTGGGAGCAAGACCTGGGGgTACCAATGACTGTGGGCAAGTCACA…	chemical synaptic transmission [GO:0007268]; circadian rhythm [GO:0007623]; smooth muscle contraction [GO:0006939]; vasoconstriction [GO:0042310]	ann.char.bf
Cytosolic 5'-nucleotidase 1B	5NT1B_MOUSE	isogroup06828	1	isotig11217	1637	AGGAACCATGAGCGGCTCCAACTCGGAGGAGCCGCAGCCCAGCCAGGCGGCGGAGGACGGGCAGCAGGAGGCCGAGCAGGACTGGGCGGCGGCCAAGGCTTTCTACGACAATCAGGTtACGCAGAGAGTCCGGCCGCCCAAGCCTCAGAATGCCATCACGGTGGCCGTGTCCTCCCGAGCGCTCTTCAACCTGGTGGAGGAGCAGCGGATCTACGAGGAGCAaGGGctGGAGAAGTACGTGGAGTACCAGCAGAACAACGAGAACGTCATCCTCAAGCCCGGACCGGCGTTCTACTTTGTCAAGGCGCTGGAGCGTGTCAATGCCCGGCTTCTTGAGCTGTACCCTGATGATGAGGAACGCTTTGATATTGTCCTGATGACTAATAACCATGCCCAGGT…	adenosine metabolic process [GO:0046085]; nucleoside metabolic process [GO:0009116]; nucleotide metabolic process [GO:0009117]	ann.char.bf
Cytosolic 5'-nucleotidase 3A	5NT3A_CHICK	isogroup01405	2	isotig04769	2010	CTtCTTTTGCTTCTGCAGCTGCTCCTGCAAAACCCTCTGCCTGCATGCAAGCCCTGCATCTCTGGACTCTGCTTGCCACCTATGCTGTTGCAGTAGGACAAAATCAAGGACAGAAGAATCAGGAGTGCCCTAAGCTCAACGCACAGATGCCAGAATTTCAGAAGAAGACTGTCCATATTAAGGACCCAGCAAGAGTAGAGGAGATTATTTGTGGCCTCATCAAAGGTGGAGCAGCCAAACTTCAGATTATTACAGATTTTGATATGACATTAAGTAGATTTTCCTACAATGGAAAAAGATGTCCAACTTGTCATAACATCATTGATAACTCTAAGATCATCACAGATGAATGTCGGAAAAAGTTATTGCAGCTGAAAGAAACCTATTATGCCATTGAAA…	nucleotide metabolic process [GO:0009117]	ann.char.bf
Cytosolic 5'-nucleotidase 3A	5NT3A_CHICK	isogroup01405	2	isotig04770	1980	AGATGGGAGCTGTGGCGAGCGCCAGCGTTTGCGCGCTGGTGGGCGGGgTGgTGCTgGCGCAGTATATCTTCACCATGAAGAAGAAgACGGGTAAGAAGACCAAGATCATCGAGATGATGCCAGAATTTCAGAAGAAGACTGTCCATATTAAGGACCCAGCAAGAGTAGAGGAGATTATTTGTGGCCTCATCAAAGGTGGAGCAGCCAAACTTCAGATTATTACAGATTTTGATATGACATTAAGTAGATTTTCCTACAATGGAAAAAGATGTCCAACTTGTCATAACATCATTGATAACTCTAAGATCATCACAGATGAATGTCGGAAAAAGTTATTGCAGCTGAAAGAAACCTATTATGCCATTGAAATTGATCCAGCTCTCACCATTGAAGAGAAAT…	nucleotide metabolic process [GO:0009117]	ann.char.bf
Cytosolic purine 5'-nucleotidase	5NTC_CHICK	isogroup00852	1	isotig03699	2789	ATTTTTGCTGATTTGAAAGCAATTAGGAGGAGGCATTTCTGTGGCTGCCCAGGAGGCTTTGTGCTGGCTGGGCGTGTGGTCAGCTCTTTTTTTTAGTGGCTACAGCAGGTCAGAAATAAGTAAGCATTTGAAGATGACAACCTCATGGAGCGACCGACTTCAGAATGCAGCAGATCTGCCTGCAAACATGGACGGACAtGCTCTGAAAAAGTACCGCCGGGAAGCCTATCACCGGGTCTTTGTAAACAGAAGTTTAGCCATGGAGAAGATAAAGTGCTTTGGTTTTGATATGGACTATACACTTGCTGGGgAGCCCAGTGTAACTCCGTCAAGCCTGGAGTGACACTCTGAATCTGCATCTGCCTCATTGTATAAATCCCCTGAATACGAATCTCTTGG…	adenosine metabolic process [GO:0046085]; IMP metabolic process [GO:0046040]	ann.char.bf
5'-nucleotidase	5NTD_BOVIN	isogroup04066	1	isotig08455	2675	TGGATTGTTGGATCCTCTTCTTAAAAAcGCAAATTTTACAGTCCTGAGTGCAAATATTAAAGGCAAAACTCCATTAGGAAATGAAATGATGAAATATGTTCATCcTTTtAAAaTAgTtCGTTTtGACtCAGAACtGTTGGAATTgTtGGCTACACTACAAAGGAAACTTCTTTTCTTTCACAGCCAGGGGATGATGTAACCTTTGAAGATGAAATTGAAGCATTGCAACTGCAAGTGAATAAACTTACTGCTATGGGAGTGAACAAAATAATTGCACTAGGACATTCTGGTTTTACTGTGGACAAAAAtATtGCCCAAAAaGTGAAAGGAGTGGACGTTGTGATTGGAGGACATACAAACACATTTCTCTACACAGGCACCCCACCCTCCACcGAACTG…	nucleotide catabolic process [GO:0009166]	ann.char.bf
6.8 kDa mitochondrial proteolipid	68MP_MOUSE	isogroup11167	1	isotig15556	973	CCcTTCCCGGCTCGCCCCGCGGCCGTCCCGGACCCGTCCCcGTGCCGTTCCCGAGTGTGACCTTCGCCGCTTCCAGCACGATGGTGCAGACCATGATTCCAAAGGCATTGCTACCCATGAAATTCTACTTCTCTACTGTGTATCAAGAAATATGGGTTGGTGTAGCATTAACGAGTTATGCCTACTACAAGATTTCATTTGGGGGCAAAAAaTCATCAGGAAATAAGTCCTCTGGTTCTGGCCATCATTAAAGATCTCTTCTCTTCTTGGAATGTGAATTTGGTGGTTCATCAGCTCTACTACAAATGAAGCGAGTTACAACCATAGGGAAATGAATGATAGAACTGTATCTGATCCATCTGCTGTAATTGGAAAAAGAATAAATCCAATGAGCAAAAa…		ann.char
Neuroendocrine protein 7B2	7B2_HUMAN	isogroup02978	1	isotig07367	3880	GGCTGCaGGGgCCGCTGAgCGGgAGGgCTGCGGTGGgtGGgAATATTCCCGGCGTGGAGGATTtCGGCcATTTTtGCCTCCCcGCCGTTCCCAGGTGCCTTGCGCCGGAGGCTGGAGCATCTTGGAGCGTCTGGCGTGAGGAAGCGGCGGCTGTGCCTGTGCCtgccGAGGAGCaCAGGGCATCTCCAGCGGGTTTGTTTGTCCaggggACCGGAAGGGATGCGTTCTAATTAGTCTGAGTGAGGGGGAAAGGAGCTTTAGGAGACAAGCATCCTGGTCAAATTCAGCCTGCCAGAGGACAGATAAGAGCGGCTGCCACTATGATAACTACCTTGCTTTGCAACATGATATTTCTGCTGGCATTTGGATTGGCTTCAGCTTTTAGCCACAGCCCTAGAA…	intracellular protein transport [GO:0006886]; neuropeptide signaling pathway [GO:0007218]; peptide hormone processing [GO:0016486]; regulation of hormone secretion [GO:0046883]	ann.char.bf
Early growth response protein 1	A0MWD2_TAEGU	isogroup04391	1	isotig08780	2482	GGCACCCGAGAGTGCGGGCTTCGGCGCTGCCGGGGAGCCCGGAGAGCAGCACTTCGAGCACCTCGCGGCAGACACTTTTCCCGAAATCTCCCTGAACAACGAGAAAACCCTGCCAGAAACCAGCTATCCCAACCAAACGACGCGACTGCCGCCGATAACCTACACGGGGCGCTTCTCCTTAGAGCCAGCTCCCAACAGCAGCAACCCCcTATGGCCAGAGCCCCTCTTCAGCCTCGTCAGTGGGCTGGTGGGCATGGCTAATGCACCTCCCACCTCTACGCCTACTTCGTCATCACCATCATCCTCCTCGCAGAGCTCCCCACTGAGCTGTTCTGTCCAAGCCAGCGAGAACAATCCAATTTATTCCGCTGCACCAACATTTCCCAATTCCAGCTCCGA…	BMP signaling pathway [GO:0030509]; cellular response to gamma radiation [GO:0071480]; cellular response to interleukin-8 [GO:0098759]; interleukin-1-mediated signaling pathway [GO:0070498]; motor learning [GO:0061743]; negative regulation of canonical Wnt signaling pathway [GO:0090090]; negative regulation of transcription from RNA polymerase II promoter [GO:0000122]; positive regulation of chem…	ann.char.bf
Ankyrin repeat domain-containing protein 13C-A	A13CA_XENLA	isogroup16460	1	isotig20849	493	aCAGTCACGGAAACACTCCTTTACATCTTGCTGTGATGTTGGGACATAAAGAATGTGCCCACCTGCTTTTAGCCCATAATGCTCCAGTAAAGGTGAAAAATGCTCAGGGATGGAGCCCTCTGGCCGAAGCCATCAGCTATGGAGACAGACAGATGATTTCAGCACTCCTGAGGAAGCTCAAGCAGCAATCCAGGGAAAGTGTTGAAGAGAAGCGACCTCGGTTATTAAAAGCCCTGAAGGAGCTAGGTGACTTCTATCTAGAGCTTCACTGGGATTTTCAAAGTTGGGTGCCTTtACTTTCCCGAATTCTGCCTTCTGATGCATGTAAAaTACACAAACAAGGTATCAATATCAGGCTGGACACAACTCTGATAGACTTTACTGACATGAAGTGCCAAC…		ann.char
Autophagy-related protein 16-1	A16L1_HUMAN	isogroup16004	1	isotig20393	547	GGAGGCGTtCTGTGTCCTCACTCCcTGCACCCcAGGATAATGCaGAGCCACATCCAGgTGCCAGTAAaGAAGTGAGAGTGCCCACTACTGCCATATGTGTCTTTGATGCACATGATGGGgAGGTGAATGCGGTGCAGTTCAGCCCTGGCTCCCGGTTACTAGCAACAGGAGGCATGGACCGGAGGGTTAAGCTTTGGGAAGTATTGGGAGATAGGTGTGAGCCCAAaGgTtCCCTCTCTGGCAGTAATGCTGGGATTACAAGCATAGAGTTTGATAGTGCTGGTTCTTACCTCTTAGCAGCTTCAAATGACTTTGCCAGCAGAATCTGGACAGTTGATGACAATCGATTACGGCACACCcTGACAGGTCACAGTGGTAAAGTTCTGTCAGCCAAGTTCC…	autophagosome assembly [GO:0000045]; macroautophagy [GO:0016236]; negative stranded viral RNA replication [GO:0039689]; protein homooligomerization [GO:0051260]; protein transport [GO:0015031]	ann.char.bf
Autophagy-related protein 16-1	A16L1_HUMAN	isogroup06036	1	isotig10425	1835	GTGTGTAATGAGTGGACATTTTGATAAGAAAATTCGGTTCTGGGACATCAGGACTGAAAGCATAGTAAAaGAACTGGAGTTGTTTGGAAGAATCACtGCTCTGGACcTGAACCCGGAGCGAACAGAGCTCCTGACCTGTTCCCGTGATGATCTCCTCAAGATCATTGATCTGCGGGTCAGTGCTGTCAAGCAGACGTTCAGTGCCCAGGGATTCAAATGTGgCTCTGACTGGACGAGAGTTGTGTTCAGCCCTGATGGTAACTATGTGGCTGCTGGCTCAGCTGATGGGGCCCTCTACATTTGGAATGTGCTTACTGGGAaGGTGgAGAGGACGCTTGCAAAGCATCACAGTTCTTCTATCAATGcagtCACGTGGTCCCCAGCGGgTGCCCACGTGGT…	autophagosome assembly [GO:0000045]; macroautophagy [GO:0016236]; negative stranded viral RNA replication [GO:0039689]; protein homooligomerization [GO:0051260]; protein transport [GO:0015031]	ann.char.bf
Autophagy-related protein 16-1	A16L1_HUMAN	isogroup14634	1	isotig19023	661	CGGAGGAGCTGCGGCGGCGGGACCGGCTGCAGCGCCAGGCTTTCGAGGAGATCATCGCCCAGTATAACAAGCTGCTGGAGAAGTCAGACCTTCATGCAGTGCTGGCTGATAAGCTTCAAGCAGAAAAATATGACATGCAGAGCAGACATGAGATCAGCCCAGGACATGATGGCACATGGAACGATGCTCAGCTGCAGGAGCTGGCCCAGCTGAAGATAAAGCACCAGGAGGAGCTGACTGAGCTGCACAAGAAACGTGGAGAGCTTGCCCAGTCTGTAATTGATTTGAACAACCAAATGCAGCAGAAGGACAAAGAGATGCAGATGAACGAAGCCAAGATTGCAGAGTATTTGCAAAGGATTTCTGAACTGGAAACAGAGTGCCAGGAATTGCGTAGCA…	autophagosome assembly [GO:0000045]; macroautophagy [GO:0016236]; negative stranded viral RNA replication [GO:0039689]; protein homooligomerization [GO:0051260]; protein transport [GO:0015031]	ann.char.bf
Alpha-1-antitrypsin	A1AT_PIG	isogroup07635	1	isotig12024	1469	GGgCCCtgTGGTcTTtgTtCtGTTTGgAGtGAaGAGATGTGgACACATGCATACAAGGTCCAAGAaCACTGGCTTCATCAGCATTCAGCTTTGTGCTTCCAGATAATATGTATCTGAAGCCATGTAATGTTTAACAGAGGAAAACAGCAGTACGAGTAAAGCAGCAAGAAACAGCACAGCCCATTGAGAGCAAGAGCCgtCTGAATGTAAATCTCTGTGAAGAATGACGAAGGCCATGCTCCCCCTGCGCCTGCTGGTGGCTGTGCTTCACCTCAGTGTCCACAGCCTGGCTCAGACTGACCAGCACGAGACAACTGACCCCCAGGAGCAGCATTCCCACCAGGGAGATCCTCTTGAGTCCTGCCAAAGGATAGTGCCAAGCAACACAGACTTTGCCTT…		ann.char
Alpha-1-antiproteinase 2	A1AT2_HORSE	isogroup07416	1	isotig11805	1515	GCAGCTGCAGCATAGTCcTGGTGAAGACAGCAGGATCCTTGGAAGcTGCTTGATGCTTCATCCCTGAgtGTGTGCAGTAActCTgaTTCAACAGCAAATACTCATGGTGGCCTGGTAGAAGAGTGAGAGCTCATGTTCACCTGTTTCCAGGATTTTAACACGAGAACATGAAGATCACATTCTACCTAAGTTTGCTGCTGGCTGGGTTTCACACTGTTGCCCACACTCAGCTCCCACCCAGTGACCACAGTGGACATGATCCAAATGACCCTAAACACCACGTACACCATGGGGGTGAAGCCATCGCTTGCCTCAAACTTGTGCCAAGCAATGCTGACTTTGCATTCCAGCTTTTTAGGGAGGTCACACAGGAGGCACCTAATAAGAACATTTTCTTCT…	acute-phase response [GO:0006953]	ann.char.bf
APOBEC1 complementation factor	A1CF_PONAB	isogroup01319	2	isotig04597	2565	AGCtCACCCCCaTGAACCaCGTCACCCTAaaGCCCcAaGGGATCAAACtggccccccAGATCTTAGAAGAAATCTGCCAGAAAAaCAACTGGGgACAGCCTGTGTACCAGCTCCACTCTGCCATTGGCCAGGATCAAAGACAGCTCTTCCTCTACAAAATCACCATCCCTGCCCTTGCCAGCCAGAACCCcACCATACACCCcTTCACACCGCCCAAGCTCAGCGCCTACATCGACGAGGCCAAGACCTACGCGGCAGAGTACACCCTGCAGACCCTGGGCATCCCCGTGGAGGGGgCAgAGGTGCCTCCTGCAGCACCAGCTTTTCCAGGATACACCATTGCTAACGCAGCTGCCACTGTCACAGCCACTCAGCTGAAGCAAGCAGTGACAATGGGAC…	mRNA modification [GO:0016556]; mRNA processing [GO:0006397]; protein stabilization [GO:0050821]	ann.char.bf
APOBEC1 complementation factor	A1CF_PONAB	isogroup14169	1	isotig18558	697	GgAGTTTGATATGATGATTAGGGAATAAGCGCAGTGACACGTCGCAAACTCCCCGCAAGCCagCAGCCCTCGCTCCCGGGGGgCCACCTCCAAAATATTGCATTGCTCAGTGAGCACCCCTAATTAACCTGATTTTTtGCTGATAATCACTCCCAATGGAATCAAATCACAAATCCGGGGATGGATTGACCGGCACACAGAAGGAAGCCGCCCTCCGTGCGTTAATTCAGCGAACGGGATATAATTTGATCCAGGAAAATGGGCAGAGGAAATATGGGGGACCACCACCAGGcTGGGATGGCCCTCCACCAGAGAGGGGCTGTGAGATCTTCATTGGGAAACTGCCCCGAGACCTCTTTGAGGATGAACTTATCCCCCTCTGTGAAAAGATTGGCAAAA…	mRNA modification [GO:0016556]; mRNA processing [GO:0006397]; protein stabilization [GO:0050821]	ann.char.bf
Alpha-2-antiplasmin	A2AP_HUMAN	isogroup05800	1	isotig10189	1911	GAGAGGCTGGAGATAAAAGCTGTAaGATGACTTGGAAGAaCAGCCAGAGGCTGGCAGATGGCTTGATGAGATTCAGCATTGATCTCCTGAGAGAGGTGCAGCTGGAGTCCAACAGAGCCAACGTGATCCTGTCCCCGCTCAGCATCGCCCTGGCCTTGTCTCACCTGGCACTGGGAGCAGCAAATCAGACAGAGAAGCATTTGCTGGAGGTGATGCACCTGGAGTCCGTGCCCTGCCTCCACCAGATGCTGGGCACCCTTaGCAGGAGGCTCACAGAGTCCACCCTGAGCCTGGGGTCACGTCTGTACCTGCAGAAAGGGTTTGAGGTGAAGGAGGAGTTCCTGGAGGATTCAGAGAAATTCTATGGAGCAAAGCCCATGACCCTTTCTGGGATCAGTC…	acute-phase response [GO:0006953]; blood vessel morphogenesis [GO:0048514]; collagen fibril organization [GO:0030199]; fibrinolysis [GO:0042730]; negative regulation of fibrinolysis [GO:0051918]; negative regulation of plasminogen activation [GO:0010757]; platelet degranulation [GO:0002576]; positive regulation of cell-cell adhesion mediated by cadherin [GO:2000049]; positive regulation of cell d…	ann.char.bf
Alpha-2-macroglobulin	A2MG_BOVIN	isogroup14137	1	isotig18526	698	GggAGTAAAAGCAGCACTGGACCACACTGAGTGTCTGCTTGACTCACCACGTCCTGCTGtGTACCATGGAGAAGAATGGGCTGCTTATCAAATCAAGCATCTTCCTCCTCCTCTTCTTCCtTCCAGGAGACACCTCACCCATCACAGAGCCGCAGTACATGGTGCTGGTGCCCTTTCTGATACACACGGATTCTCAAGAGAAAGTCTGTGTTCAGCTGACCCACCTGAACGAGTCTGTGACACTGAGTGCCACaCTCGAGTACCTTGGGGAGAACAGGAGCTTGATTGATGACGTGGTGTCCGAGAAAGATGTGTTCACCTGCATCCCTTTCTCTCTTCCAAAATCAAGAATCCCGTTACCAGACATGTTTCTCACTGTGACGGTGAAGGGGAACACGC…	negative regulation of complement activation, lectin pathway [GO:0001869]; stem cell differentiation [GO:0048863]	ann.char.bf
Alpha-2-macroglobulin	A2MG_HUMAN	isogroup00448	3	isotig02692	5629	GGGCTGTTTGCAGAGAGCTGCTATAAAGAGGCTGAGAGAGCACACAGTGGAGGAGAATCACAAGGTGCAGGAAAACAGCAGCACTGCTTGGCTCACCACGACCTGCCCTGTGCCATGGGGAAGGACAAGCTGCCCAGCAAGCCAAACATCTTCCTCCTTCTCCTCTTCTTCCTTCCTGGAAATGCTGCTCTCAACGCAGAACCGCAGTACATGGTGCTGGTGCCCTTTCTGATACACACGGATTCTCAAGAGAAAGTCTGTGTTCAGCTGACCCACCTGAACGAGTCTGTGACACTGAGTGCCACgCTCGAGTACCTTGGGGAGAACAGGAGCTTGATTGATGACGTGGTGTCCGAGAAAGATGTGTTCACCTGCATCCCTTTCTCTCTTCCAAAATCC…	blood coagulation, intrinsic pathway [GO:0007597]; extracellular matrix disassembly [GO:0022617]; negative regulation of complement activation, lectin pathway [GO:0001869]; platelet degranulation [GO:0002576]; regulation of small GTPase mediated signal transduction [GO:0051056]; stem cell differentiation [GO:0048863]	ann.char.bf
Alpha-2-macroglobulin	A2MG_HUMAN	isogroup00448	3	isotig02691	6991	GGGCTGTTTGCAGAGAGCTGCTATAAAGAGGCTGAGAGAGCACACAGTGGAGGAGAATCACAAGGTGCAGGAAAACAGCAGCACTGCTTGGCTCACCACGACCTGCCCTGTGCCATGGGGAAGGACAAGCTGCCCAGCAAGCCAAACATCTTCCTCCTTCTCCTCTTCTTCCTTCCTGGAAATGCTGCTCTCAACGCAGAACCGCAGTACATGGTGCTGGTGCCCTTTCTGATACACACGGATTCTCAAGAGAAAGTCTGTGTTCAGCTGACCCACCTGAACGAGTCTGTGACACTGAGTGCCACgCTCGAGTACCTTGGGGAGAACAGGAGCTTGATTGATGACGTGGTGTCCGAGAAAGATGTGTTCACCTGCATCCCTTTCTCTCTTCCAAAATCC…	blood coagulation, intrinsic pathway [GO:0007597]; extracellular matrix disassembly [GO:0022617]; negative regulation of complement activation, lectin pathway [GO:0001869]; platelet degranulation [GO:0002576]; regulation of small GTPase mediated signal transduction [GO:0051056]; stem cell differentiation [GO:0048863]	ann.char.bf
Alpha-2-macroglobulin	A2MG_HUMAN	isogroup00448	3	isotig02693	4854	AAGATGATCAGCATTCTTGATGAAGAGCTGAAGgTGACAGTTTGTGGACTATACACGTTTGGGAAGCCTGTTCCTGGTCTCGTGAGCTTCCGTGTCTGCCGGGAGTATGAACGTGCAGCCACATCTTGCTATGGTGAAGAGGCTAGAGCAGTCTGTGAGGAGTTCTCTGGACAGACAGACGTCTATGGCTGCATTTCTGAAGTAGTAAAGACGAAACTATTCCAGCTCAAGAGACGTGGCTATATgAATAAGCTCAATGTGGAGGCTAAAATTAAAGAGGAGGATACAGGAGTGGAGTTGACTGGAACAAGCTTCTCTGAGATCACAGCCACCATTAGCAGAGTCACGTTTGAGCTTTCAGATACTTACTACAAGCAAGGAGTCCCCTTCTTTGGGCAG…	blood coagulation, intrinsic pathway [GO:0007597]; extracellular matrix disassembly [GO:0022617]; negative regulation of complement activation, lectin pathway [GO:0001869]; platelet degranulation [GO:0002576]; regulation of small GTPase mediated signal transduction [GO:0051056]; stem cell differentiation [GO:0048863]	ann.char.bf
Amyloid beta A4 protein	A4_CAVPO	isogroup01094	2	isotig04148	3293	GCCGGACGGCATCCCTCCTTCCCcTCTCTCCTCCcTCCCGCcTCCCGGCCGCCGCGATGCTGCCCCACTTAGCCGTCCTGCTGCTGGCCGCCGGCGCCACCCGGGCTCTCGAGGTGCCTGCTGATGGAAATGCAGGGCTGCTGGCAGAGCCTCAGATTGCCATGTTCTGTGGgAAACTCAACATGCATATGAATGTGCAGAATGGAAAGTGGGAATCAGACCCCTCTGGCACCAAGACCTGCATTGGGACGAAAGAaGGGATTCTTCAGTACTGCCAGGAAGTGTACCCTGAGTTGCAAATCACCAATGTTGTTGAAGCCAACCAGCCAGTTACAATACAGAACTGGTGCAAGAGGGGATGGAAGCAGTGCAATGGTCACCCACATATTGTGGTTCCCT…	adult locomotory behavior [GO:0008344]; apoptotic process [GO:0006915]; axo-dendritic transport [GO:0008088]; axon midline choice point recognition [GO:0016199]; axonogenesis [GO:0007409]; cell adhesion [GO:0007155]; cellular copper ion homeostasis [GO:0006878]; collateral sprouting in absence of injury [GO:0048669]; dendrite development [GO:0016358]; endocytosis [GO:0006897]; extracellular matri…	ann.char.bf
Amyloid beta A4 protein	A4_SAISC	isogroup01094	2	isotig04147	3461	GCCGGACGGCATCCCTCCTTCCCcTCTCTCCTCCcTCCCGCcTCCCGGCCGCCGCGATGCTGCCCCACTTAGCCGTCCTGCTGCTGGCCGCCGGCGCCACCCGGGCTCTCGAGGTGCCTGCTGATGGAAATGCAGGGCTGCTGGCAGAGCCTCAGATTGCCATGTTCTGTGGgAAACTCAACATGCATATGAATGTGCAGAATGGAAAGTGGGAATCAGACCCCTCTGGCACCAAGACCTGCATTGGGACGAAAGAaGGGATTCTTCAGTACTGCCAGGAAGTGTACCCTGAGTTGCAAATCACCAATGTTGTTGAAGCCAACCAGCCAGTTACAATACAGAACTGGTGCAAGAGGGGATGGAAGCAGTGCAATGGTCACCCACATATTGTGGTTCCCT…	adult locomotory behavior [GO:0008344]; apoptotic process [GO:0006915]; axo-dendritic transport [GO:0008088]; axon midline choice point recognition [GO:0016199]; axonogenesis [GO:0007409]; cell adhesion [GO:0007155]; cellular copper ion homeostasis [GO:0006878]; collateral sprouting in absence of injury [GO:0048669]; dendrite development [GO:0016358]; endocytosis [GO:0006897]; extracellular matri…	ann.char.bf
Amyloid beta A4 protein	A4_TAKRU	isogroup05303	1	isotig09692	2080	ATCGGATGAGATGTACTGTGAACGATATGCTCGTGAGTTCAATAGACTGCAGAAAATCAATGTCACACATAAGCAAGGCCACTGTGTGGACTTGCCTGATACTGGACAGTGCACTGAGAGCATCCCCGCTGGTACTATAaCCCATTCTTGGAGAAATGTGACCCcTTCACCTACGGGGgCTGTGGTGGCAACAGCAACAACTTTGAGCAAGAGGAGgAGTGCATGAAATCCTGTTCAGGCATCACAAAAGCGGATGTCATTGGCCGAAGATGGGAaTCATTTGAGTCCCAGACTGCTATGTTAAGTGCCTTTGAGGTAGTGATTGCTGTGCTCcTGGGGATCTGCATCATGGTGGTCCTGGTGTTCATTGGCTACTTCTTCCTGAAGAAAAGGAACAAG…	nervous system development [GO:0007399]	ann.char.bf
Lactosylceramide 4-alpha-galactosyltransferase	A4GAT_GORGO	isogroup09079	1	isotig13468	1235	TCCGGTTCGGTTCGGTCCGGCGCTGCGGGACGGAGCCGCGCTCCGGCCGAGTTGCAGAAGGAACATGAAGCCTGCCATAGAGGCAGAAGGTCGATAGATTGGGAGTTCAGAGATCCCTTTAAAACAACCCAGAATTGACTTCTACATCTGGCTACAGGCTGTCTcAGGAGAGCAGGCTCTGGCTGGAGAGAGAATGCTCAGGATGCCCAGCTGCCTCCTAAAGCTGAGCAGGGTGGTGCTGAGCCACAAGCCCTGGGCCCTGTTTACCCTCATCTTTGTGTTCATATCCTTCGCCTAcAtCAAGCTGTATTTGGGCATCTGGGAGGACCCAGAGAGCAGAGTCCCCACcTATGGCTTGTCTGCTGAGATCAGCTGTGCTCACtATgTGCCTTCTCCCCT…	lipid metabolic process [GO:0006629]; protein glycosylation [GO:0006486]	ann.char.bf
LETM1 and EF-hand domain-containing protein anon-60Da, mitochondrial	A60DA_DROME	isogroup13303	1	isotig17692	769	CGGTGGCCTGAGCGTGTTGGAgCTGCAGAGTGCCTGCAGGGCCAGAGGGATGCGCTCAGTGGGGCTCTCTGAGgAGCAGCTGAAGGAGCAGCTTGGGCAGTGGCTGGATCTGCATTTAAAGGAGAACGTTCCTTCTTCTCTCCTCCTGCTTTCCCGTGCCTTGTACTTAATAGACCTAAGGCCACAATCTGTTTCCACTCCACAGAATAAGACAGGTGAAGCTGCAGGAGTGATGACATCTGTGCTTGATCCTGCCCCTGTTGTACAGGGAAGAAAGAATGAAGAATTtGTGTCCcAGCCAACAGAGAAATTGCCaTTCTCAGAAGCATCAGTGAAGcCTCCCCcACGAGAGACCAAAaTGGAAGCATCCCAGAGCAGCAAGGCTGGTGCCAATGGAGC…	cellular metal ion homeostasis [GO:0006875]; cellular response to hypoxia [GO:0071456]; hydrogen ion transmembrane transport [GO:1902600]; mitochondrial calcium ion transmembrane transport [GO:0006851]; mitochondrion morphogenesis [GO:0070584]; neurotransmitter secretion [GO:0007269]; potassium ion transmembrane transport [GO:0071805]	ann.char.bf
Arylacetamide deacetylase	AAAD_RABIT	isogroup13972	1	isotig18361	712	AGAGCACAGCCTGCAACGATGGGGgCCAGGCTGCTGTGCCTGTGCCTGCTCACAGCCCTGCTCGGCTACTACATCTACAGCCCCATCCCCGAGGACATAGCCCAGCCCTGGACCGTGATGCTCGCCTCGTCTGCCTTGAGGAGCCTGGGGCACCTGTCCGAGGCAGCTGATGTGCTGGGGCTCATGCCCTACATGAAGGTCATGAGGCTGTTCACAGATGTCCAGCTCGTCCCCCCCACGTCTGATGAAAACGTCACCGTGACAGAGACGGAGTTCAGCGGCGTCCCTGTCCGCCTGTACCTGCCCAGGAGGGCCCCTGGCGGGCTCAGGAGGGCCATGGTCTACATCCACGGAGGGGGCTGGTGCCTGGGAGACGCAGGCATGCAAGGCTACGATATC…	metabolic process [GO:0008152]	ann.char.bf
Acetoacetyl-CoA synthetase	AACS_CHICK	isogroup06713	1	isotig11102	1663	CGCAGGTGATGtGGgaGCcTGACAcGAAGCgCAAcACCCACATGGACCGGTTCCGCgCcGCCGTGGCCAGCAGCTGTGGGATCcGCcTGGCcAaCTATGATGATTTGTACCAGTGGTCAGTGGAGTCCTACTCAGACTTCTGGGCGGAGTTCTGGAAGTACAGTAACATTGTCTGCTCTCGCCTCTACGACGAGGTGGTGGATACATCCAAAAGTATTGCAGATGTCCCCGAGTGGTTCAAGGGCAGCCGTCTGAACTATGCAGAGAATCTCCTGAGGCACAAGGACAATGATAAGATTGCACTGTATGCAGCAAGGGAAGGCAAAGAAGAAATAGTGAAAGTTACTTTtGAAGAACTGAGACAAGCTGTGGCTTTGTATGCTGCAGCCATGAGGAAGA…	fatty acid metabolic process [GO:0006631]	ann.char.bf
Acetoacetyl-CoA synthetase	AACS_CHICK	isogroup08175	1	isotig12564	1379	TGGTGGGGGGgTTCATGAATATTTTCATAAAGCCACTACATGAAAAAAAAaTATAATTTCATCTTTGCTGGTTTTTGTTTTTCAGTATACAGTAAATGGGAAGAAAGTGGAAGTGGCTGTGAAGCAAATAATTGCAGGGAAACAAGTGGAGCAGCGAGGAGCTTTCTCAAACCCAGAGGCTTTGGACCTGTACCAAAATATTCCTGAGCTTCAAGACTATTAAAGTCACTTGTTTGGGTTTTTTTTttGTCTGTCTTTGTTCTGTATTTGTTTTGTATATACCAATACTGTATGTAAAGAAAAAGTCTATTTAATACCAGTGGTTCTTTTAAAAGGAAAAAAAaCTATTTCATGAAGTGCATTATGAAAGGCTTGGGTAAAGCTTAGCTCCCTTTTATT…	fatty acid metabolic process [GO:0006631]	ann.char.bf
Kynurenine/alpha-aminoadipate aminotransferase, mitochondrial	AADAT_BOVIN	isogroup03550	1	isotig07939	3086	CgCCcTGCcGCCCGCCCGCTCCGCGCCCTCCGCCGATATGAATTACTCTAGGTTCATGACCACTGTGAGTGCAGCAAGAAAAGCATCTCCAATAAGACTGCTGACTGAATTGATGCAGAGGTCTCCTCCATCTCTCATCTCTCTGGCTGGAGGGGCACCAAATCCTAATCTTTTTCCATTTAAGAAGGCAACTGTTGACATTGGACATGGAACTCCCATTGAGATTGGGGAAGATCTGATGAAGAGAGCCCTCCAGTACTCAGCCTCAGCCGGGATTCCAGAGTTGGTGTCTTGGCTAAAAGATTTCCAGCAGACCTTACATGATCCCCCcACAGCCAATTACAGGCCTGAGCAAGGACAGATGGAAGTGTGTGTCACAACCGGCAGCCAGGAAGGCTT…	2-oxoglutarate metabolic process [GO:0006103]; biosynthetic process [GO:0009058]; glutamate metabolic process [GO:0006536]; kynurenine metabolic process [GO:0070189]; L-lysine catabolic process to acetyl-CoA via saccharopine [GO:0033512]	ann.char.bf
Thioredoxin-like protein AAED1	AAED1_BOVIN	isogroup12171	1	isotig16560	874	GCTGTACGCGGAGCAGAAAGCCATCGTGCTGTTCGTGCGGAATTTTTtGTGTTACACCTGTAAGGAGTACGTAGAAGACCTGGCAAAAGTCCCCAAGGCATTTTTACAAGAATCAAATGTGAGGCTTATAGTTATTGGGCAGTCaTCATATCATCACATCAAGCCCTTTTGCAGTTTAACTGGGTATACACATGAAATGTATGTAGATCCACAAAGGGAACTTTATAAAGTACTTGGCATGAAAAGAGGTGAAGGTAATAAAGTATCAGTTCGGAGCCCTCATGTGAAATCAAACGCACTACTGGGAAGCATTAGGAGTATATGGAGAGCAATGACTGGCCCAGCTTTTGATTTTCAAGGAGACCCTGCTCAGCAGGGAGGAGCTTTGATTATAGGCCC…	oxidation-reduction process [GO:0055114]	ann.char.bf
Alpha- and gamma-adaptin-binding protein p34	AAGAB_RAT	isogroup12889	1	isotig17278	804	TGAGAATGGTGTAAaCAGACAGAAaGCTCAAGAATGGTGCATCAAGCATGGCTTTGAGCTGGTAGAGCTCAACCCTGAGGAGCTGCCTGATGAGGATGATGAtttCCCCGAGTCCACCGGcGTGAAGCGCATTGTGCAGGCCCTCAACGCCAACGTCTGGTCCAACGTGCTCATGAAGGGGGACAGGATCCAGGGCTTTGGTCTGCTCAGCACCTTGGCAGGAGCCAGCAGGAGCCGTGGCTGTGAAGAGACCCCTGAGACAGAATCCAACCCATCCCCAGGAGACAGGGAAGAGTCCCAGTCAGAGGGAGAGGATGGAGcTGGCACCAACAGCCTGGAGCCTGCCAGTGCTGCAGATCCCATGCTGGAAATGGACATCCAGGAGCTGGCCAGCCTGAC…	protein transport [GO:0015031]	ann.char.bf
AP2-associated protein kinase 1	AAK1_BOVIN	isogroup12550	1	isotig16939	837	CCTTtGATGATGACAACTTCTCCAAGCTGACAGCTGAGGAGCTGCTGAACAAGGACTTTGCAAAGCTGGGGGAAGGGAAGGCCCCAGAAAAGGCAGGCAGCTCCACAGAGAACCTGATGCCAGGTTTCCAGCCCGtGTCCGCAGCCCcGgCCGATGCGTTCGGGGgCTCTTCCTTCACTGCtGGgCCAGCTGAAAAAaCGAAAGACATTCTGAGTTTGGACTCTAACCCTCCTCTTCTGACTGTGCCTGATCCTTTCATTCCTCTCCCGTTATCTGACACCCCAGAGAAACTGATTGAGGGACTCAAATCTCCCGAGCCTGCGCTGCTGCTCCCCGAGCTGCTGCCTCTGGCTGACCCCTTCGGCAGCACGTCAGACGCTGTCAATGGAAAAGCTGACG…	endocytosis [GO:0006897]; positive regulation of Notch signaling pathway [GO:0045747]; protein autophosphorylation [GO:0046777]; protein phosphorylation [GO:0006468]; protein stabilization [GO:0050821]; regulation of clathrin-dependent endocytosis [GO:2000369]; regulation of protein localization [GO:0032880]	ann.char.bf
AP2-associated protein kinase 1	AAK1_BOVIN	isogroup10344	1	isotig14733	1065	GCAATGGGGTGAAGTGTGCCCTGAAGAGGATGTATGTCAACAACGAGTACGACCTGCAGGTCTGCAAGAGAGAGATCCAGATCATGAGGGATCTCTCTGGCCACAAGAACATTGTGGGCTACATtGACTCCAGcaTCAACTCTGTCAGCAGCGGGGACGTGTGGGAGGTGCTGATCCTCATGGaCTTCTGCCGGGGGgACAGgTGGTGAACcTGATGAACCAGCGCCTGCAGAGCGGCTTCACCGAGAGCGAGGTGCTGCAGATCTTCTGTGACACCTGTGAGGCTGTGGCCAGGCTGCACCAGTGCAAGACTCCCATCATCCACAGGGATCTGAAGGTTGAAAACATCCTGCTGCATGACCGTGGCCACTATGTCCTGTGTGACTTTGGGAGTGCTAC…	endocytosis [GO:0006897]; positive regulation of Notch signaling pathway [GO:0045747]; protein autophosphorylation [GO:0046777]; protein phosphorylation [GO:0006468]; protein stabilization [GO:0050821]; regulation of clathrin-dependent endocytosis [GO:2000369]; regulation of protein localization [GO:0032880]	ann.char.bf
5'-AMP-activated protein kinase subunit beta-1	AAKB1_HUMAN	isogroup05024	1	isotig09413	2184	GGGCGGAAGCGGAAGCGCGGCGGGAGCACGGCGGGAGGCGGCGGGCGATCCACAGAAATGGGGAACACGAGCAGCGAGCGAGCGGGGCTGGAGCGCCATGGGCACAAAGCCTCCCGAGGGGACAGCTCAGGAGGAGCCAAGGAGGGGgACAGACCAAAAATCCTCATGGACAGTCCTGAAGATGCAGACTTGTTCCATTCAGAGGAAATGAAGGCTCCTTTGGAGAAGGAAGAGTTTCTAGCTTGGCAGCAGGATCTGGAAGTGAATGACAAAacccccActCAAGCTCGGCCAACAGTCTTCCGCTGGACTGGAGGAGGGAAAGAAGTTTTTTtATCAGGGTCCTTCAACAACTGGGGCAAAATTCCTCTGACAAGGAGTCACAATAACTTTGTGGCA…	cell cycle arrest [GO:0007050]; fatty acid biosynthetic process [GO:0006633]; macroautophagy [GO:0016236]; nail development [GO:0035878]; positive regulation of gene expression [GO:0010628]; protein heterooligomerization [GO:0051291]; protein phosphorylation [GO:0006468]; regulation of macroautophagy [GO:0016241]; regulation of protein kinase activity [GO:0045859]; regulation of signal transducti…	ann.char.bf
5'-AMP-activated protein kinase subunit beta-2	AAKB2_HUMAN	isogroup10286	1	isotig14675	1073	TGTCATGgCAGCCAGATCTGGAGGAGTCAGTGAAaCCATCCCAGCaGGCtCGtCCGACTGTCATACGCTGGGCTGATGGAGgCAAGGAGGTCTTCATCTCTGGATCCTTCAACAACTGgAGCACCAAGATCCCACTCATCAAGAGCCACAATGACTTCGTTGCTATCCTGGACCTTCCAGAAGGAGAGCACCAGTACAAATTTTTTGTGGATGGCCAGTGGGTCCATGATCCATCTGAGCCTGTGGTTACCAGCCAGATGGGGACGATAAAtAACCTCATCCACGTCAAGAAGTCTGACTTCGAGGTGTTTGATGCATTGAAGGTGGATTCCCTGGAAAGCTCAGAAACCTCAGgTcGGgATTTGTCCAGCTCCCCACCGGGACCTTATGGCCAAGAGA…	carnitine shuttle [GO:0006853]; cell cycle arrest [GO:0007050]; fatty acid biosynthetic process [GO:0006633]; macroautophagy [GO:0016236]; protein phosphorylation [GO:0006468]; regulation of fatty acid biosynthetic process [GO:0042304]; regulation of macroautophagy [GO:0016241]; regulation of protein kinase activity [GO:0045859]; regulation of signal transduction by p53 class mediator [GO:1901796…	ann.char.bf
5'-AMP-activated protein kinase subunit gamma-1	AAKG1_PIG	isogroup11339	1	isotig15728	955	TGAAaTCCCATCGCTGCTACGACCTGATCCCCACCAGCTCCAAACTGGTCGTCTTCGACACATCCCTGCAGGTGAAGAaGgCGTTCTTCGCGCTGGTCACCAACGGTGTCCGGGCAGCGCCGCTCTGGGACAGCAAAAAGCAAAGTTTTGTGGGAATGCTGACCATCACCGACTTCATCAACATCCTGCACCGCTACTACAAATCACCCATGGTGCAGATtTATGAGCTGGAGGAACATAAAATAGAGACCTGGAGAGAGGTTTATCTGCAgGACTCCTTCAAGCCACTGGTCTGCATTTCCCCCAATGCCAGCcTGTTtGACGCTGTCTCcTCCcTGATCcGgAaCAAGATCCATCGCCTGCCCGTCATCGACCCCGACTCGGGGAACACGCTCTACA…	fatty acid biosynthetic process [GO:0006633]; protein phosphorylation [GO:0006468]	ann.char.bf
5'-AMP-activated protein kinase subunit gamma-2	AAKG2_HUMAN	isogroup05005	1	isotig09394	2190	tttccccttGAATCCTACAAGCATGAGCCCGAGAGACTCgaaGCACgggttCAGTGCTCCTCGCCTccggAcacggggcagagatttCCTCTGCCTCCATCACAGAGTGCAGCCAAGccTcccatCGTGACACCAGCTCCCTGTGCTACCTcaaaaccAGCGGCGGCAGCGGCTCCGGcTcccttgcAGctcccggccgccTccgAAgggatgcTggAGAAACTAGAGCTCGAAGATGAAGCACTTGAAGAATCGGAAAGTGACATTTATGTGCGATTCATGAGGTCACACAAGTGTTATGACATTGTTCCAACAAGCTCTAAGCTTGTTGTTTTCGACACTACGCTACAAGTAAAGAAAGCCTTTTTTGCCTTGGTGGCAAATGGTGTTAGAGCAGCT…	ATP biosynthetic process [GO:0006754]; carnitine shuttle [GO:0006853]; cell cycle arrest [GO:0007050]; fatty acid biosynthetic process [GO:0006633]; glycogen metabolic process [GO:0005977]; intracellular signal transduction [GO:0035556]; macroautophagy [GO:0016236]; negative regulation of protein kinase activity [GO:0006469]; positive regulation of peptidyl-threonine phosphorylation [GO:0010800];…	ann.char.bf
5'-AMP-activated protein kinase subunit gamma-2	AAKG2_MOUSE	isogroup02308	2	isotig06576	499	ACACACCCAGCCcTGCTCCCCATCTGTTGCAGCATCGGCTCCAGTAGCAGAGCCCGAGATGTTTAAATGCGCCTGCCTTTAGGGAAAAGCTTTCAATGCAGTTCTTCGATGGACGTTTCCAGCCAGACTGCAGGATTTTTCAGAGCTGATCTCAGCTCATTTGCCATGCCGTTCTTGGACGGTGATGTGGAGAGCACAGACAAAAATGCTTCTCGCAAGGTGGATGAAAGCTACTCAGCCGGCAGTCCTTCAAAAGGCCTTTTCTCAAAAGGGCTCCAGAACCGACCTTCCAGCCCTGTTTCTGCCCCTGTGAGATCCAAACACAGTCCTGGCTCACCCAAAACAGTGTTCCCCTTCCCCTACCAGGAGTCTCCCCCACGCTCCCcACGCCGAATGAGC…	fatty acid biosynthetic process [GO:0006633]; glycogen metabolic process [GO:0005977]; intracellular signal transduction [GO:0035556]; membrane organization [GO:0061024]; mitochondrion organization [GO:0007005]; negative regulation of protein kinase activity [GO:0006469]; positive regulation of peptidyl-threonine phosphorylation [GO:0010800]; positive regulation of protein kinase activity [GO:004…	ann.char.bf
5'-AMP-activated protein kinase subunit gamma-2	AAKG2_MOUSE	isogroup02308	2	isotig06575	579	aaaaaagAGAGAAAAGAAAAAATAAATAAGGAGCCTGGAGTAACTGCGGCCCGTGGGACGgTGGGGAGAGGTGGAACAGGAGCCTCCcTCTCCAGATCCATCGCTCAGCACcACGCTTGGGTGAAGGCATGGGAAGCACTGCCATGGACAAGAAGAAAGATGCCTCCAGCAGCAGCAGCAGGAAAAGCTCCAGCCACAAGAAACTCATGTTGCGAGTGCACATCCCCGATCTCAGCTCATTTGCCATGCCGTTCTTGGACGGTGATGTGGAGAGCACAGACAAAAATGCTTCTCGCAAGGTGGATGAAAGCTACTCAGCCGGCAGTCCTTCAAAAGGCCTTTTCTCAAAAGGGCTCCAGAACCGACCTTCCAGCCCTGTTTCTGCCCCTGTGAGATCCA…	fatty acid biosynthetic process [GO:0006633]; glycogen metabolic process [GO:0005977]; intracellular signal transduction [GO:0035556]; membrane organization [GO:0061024]; mitochondrion organization [GO:0007005]; negative regulation of protein kinase activity [GO:0006469]; positive regulation of peptidyl-threonine phosphorylation [GO:0010800]; positive regulation of protein kinase activity [GO:004…	ann.char.bf
Mth938 domain-containing protein	AAMDC_HUMAN	isogroup01528	2	isotig05016	1664	TAACACCTTCTTTCGATTAAATTCCTTTAGTTCCAATTCCATTTATTTTTGCAAGGGAGGACTGCATTTTAAAGTGTGCTAAGgAGATAGGGGAGGTGTGTGCATGAAAGTAGCTTTATTGAAGAGAAAAAAAaTTAAATCAATCTTAGAGCTATCTGAGCATTATCGTTTTGACTACTGGCAGTTACTTAAGTCATGTTTAACAAATGGCATCAGTACCTCGTTTtCTCTTACAGTTTAAGGGAAAAGAATCTGACACTTGCTTTTGTGATTTCCCTTTCTCTCCGAGGTTCCAGCATCCACTGTGGACTATCTGAAGAAGAACGGGATCGACGTGCTGGTGCTGCAAACgGAGAAGGCTGTGGCCGAGTACAATGCCCTGGCTGCTCAGGGTGTCAA…	negative regulation of apoptotic process [GO:0043066]; positive regulation of fat cell differentiation [GO:0045600]; positive regulation of transcription from RNA polymerase II promoter [GO:0045944]	ann.char.bf
Mth938 domain-containing protein	AAMDC_HUMAN	isogroup01528	2	isotig05015	1666	GgAGGCGGAGCCTGGCGGGGCtGTGGGGTCGCGCGCGCGGGGCGACTTCGGTTCAACTTTGTGATGTCTTCCCCTGAAATTGCTTCCCTTTCTTGGGGTCAcATGAAGGTGAAAGGCTGCTCTACAACATATAAGGACTGCAAAGTATGGCCGGGAGGAAGCCGGGCTTGGGATTGGCGAGAAACCGGGACTAATCATTCTCCAGGAGTGCAGCCAGCTGACCTTGAAGAAGTCGTCAAGAAGGGTGTTAAAACTGTGGTGATTGGTCGTGGCATGAGTGAGGCTTTGCAGGTTCCAGCATCCACTGTGGACTATCTGAAGAAGAACGGGATCGACGTGCTGGTGCTGCAAACgGAGAAGGCTGTGGCCGAGTACAATGCCCTGGCTGCTCAGGGTGTC…	negative regulation of apoptotic process [GO:0043066]; positive regulation of fat cell differentiation [GO:0045600]; positive regulation of transcription from RNA polymerase II promoter [GO:0045944]	ann.char.bf
Angio-associated migratory cell protein	AAMP_BOVIN	isogroup03653	1	isotig08042	2984	TTCTGTCTTCTGTGTGAGCCTTGACCCCAAGACCAACACGCTGGCAGTGACAGGCGGAGAGGATGACAAGGCCTTCGTGTGGCGTGTGAGTGATGGAGAGCTCCTGTTTGAGTGCTCAGGACACAAGGACTCGGTCACCTGTGCTGGCTTCAGTCACGACTCTGTGTTCGTGGCCACAGGTGACATGTCAGGGCTTATCAAAGTGTGGCGTGTGGATGCCAAGGAGGAAGTGTGGTCCTTCGAGGTGGGGGACTTGGAGTGgATGGAGTGGCACCcTCAAGCCCATGTGCTTCTGGCTGGTACAGCTGATGGCAACACcTGGATGTGGAAGATTCCCAGTGGGGACTGCAAAACCTTtCAGGGTCCAGCATGCCCAGCCACATGTGGCAGgATCCTGCC…	angiogenesis [GO:0001525]; cell differentiation [GO:0030154]; positive regulation of angiogenesis [GO:0045766]; positive regulation of endothelial cell migration [GO:0010595]; ribosomal large subunit biogenesis [GO:0042273]; smooth muscle cell migration [GO:0014909]	ann.char.bf
5'-AMP-activated protein kinase catalytic subunit alpha-1	AAPK1_HUMAN	isogroup00373	4	isotig02395	1584	GAAaTGTGGCAaTTTTTGACTGGCTCgCTTCAGCTAAGGGgCCTGAGgACCCcGGCCCTCTACACTCCGCCGTTTCTCCCTTCTCTTCCCGTCCTTCCAGGaCGTTTTTGCAGgACAAGGGGCTGAGGAGAGACGGCGGCGCCGATATCAGCTGAGTCTAGCCGAGCCGAAAAAGGAGTCCAGCGGGGTGTTAGGAAGAGGCAGCGAAGCGgCAGAATCGACTCACACGCACCCCAGCACAGCGgACCAGTAGTAGCGGCCGTGCAGGAACCTGGTGCCGAACTGAACTCAAGCGGAAGGAGAGTCgACCCGGCTTGgAAGACCGAGCTTCTGggggTACTGCGGCACGGGCGTGCTCTATGAGCAGGCTCAGCCCTAGGCTTAAGATGGCGGCGgCAG…	activation of MAPK activity [GO:0000187]; CAMKK-AMPK signaling cascade [GO:0061762]; cell cycle arrest [GO:0007050]; cellular response to ethanol [GO:0071361]; cellular response to glucose starvation [GO:0042149]; cellular response to hydrogen peroxide [GO:0070301]; cellular response to hypoxia [GO:0071456]; cellular response to nutrient levels [GO:0031669]; cellular response to organonitrogen co…	ann.char.bf
5'-AMP-activated protein kinase catalytic subunit alpha-1	AAPK1_HUMAN	isogroup00373	4	isotig02394	4513	GGCTCGGCCCTTGCCTCAAGATGGCGGCGGTGGCGGATAAACAGAAGCACGAGCACGGGCGGGTGAAGATCGGGCAtTACATCCTGGGGGACACGCTGGGCGTCGGCACCTTCGGGAAAGTCAAGgTTGGAAAACaTGAGTtAaCTGGgCATAAAGTTGCtGTGAAGATCCTgAATCGACAGAAGATTCGCAGCCTTGATGTTGTcGGCAAAATCCGCAGGGAGATTCAGAACCTCAAACTCTTCAGGCATCCTCATATAATTAAGCTGTACCAAGTCATCAGTACACCCACTGACATTTTCATGGTGATGGAATATGTTTCAGGAGGAGAACTGTTTGATTATATCTGTAAAAATGGAAGGCTTGATGAGAAGGAAAGTAGACGTCTGTTTCAGCAAA…	activation of MAPK activity [GO:0000187]; CAMKK-AMPK signaling cascade [GO:0061762]; cell cycle arrest [GO:0007050]; cellular response to ethanol [GO:0071361]; cellular response to glucose starvation [GO:0042149]; cellular response to hydrogen peroxide [GO:0070301]; cellular response to hypoxia [GO:0071456]; cellular response to nutrient levels [GO:0031669]; cellular response to organonitrogen co…	ann.char.bf
5'-AMP-activated protein kinase catalytic subunit alpha-1	AAPK1_HUMAN	isogroup00373	4	isotig02396	1215	GGCTCGGCCCTTGCCTCAAGATGGCGGCGGTGGCGGATAAACAGAAGCACGAGCACGGGCGGGTGAAGATCGGGCAtTACATCCTGGGGGACACGCTGGGCGTCGGCACCTTCGGGAAAGTCAAGgTTGGAAAACaTGAGTtAaCTGGgCATAAAGTTGCtGTGAAGATCCTgAATCGACAGAAGATTCGCAGCCTTGATGTTGTcGGCAAAATCCGCAGGGAGATTCAGAACCTCAAACTCTTCAGGCATCCTCATATAATTAAGCTGTACCAAGTCATCAGTACACCCACTGACATTTTCATGGTGATGGAATATGTTTCAGGAGGAGAACTGTTTGATTATATCTGTAAAAATGGAAGGCTTGATGAGAAGGAAAGTAGACGTCTGTTTCAGCAAA…	activation of MAPK activity [GO:0000187]; CAMKK-AMPK signaling cascade [GO:0061762]; cell cycle arrest [GO:0007050]; cellular response to ethanol [GO:0071361]; cellular response to glucose starvation [GO:0042149]; cellular response to hydrogen peroxide [GO:0070301]; cellular response to hypoxia [GO:0071456]; cellular response to nutrient levels [GO:0031669]; cellular response to organonitrogen co…	ann.char.bf
5'-AMP-activated protein kinase catalytic subunit alpha-1	AAPK1_PONAB	isogroup00373	4	isotig02393	4882	GAAaTGTGGCAaTTTTTGACTGGCTCgCTTCAGCTAAGGGgCCTGAGgACCCcGGCCCTCTACACTCCGCCGTTTCTCCCTTCTCTTCCCGTCCTTCCAGGaCGTTTTTGCAGgACAAGGGGCTGAGGAGAGACGGCGGCGCCGATATCAGCTGAGTCTAGCCGAGCCGAAAAAGGAGTCCAGCGGGGTGTTAGGAAGAGGCAGCGAAGCGgCAGAATCGACTCACACGCACCCCAGCACAGCGgACCAGTAGTAGCGGCCGTGCAGGAACCTGGTGCCGAACTGAACTCAAGCGGAAGGAGAGTCgACCCGGCTTGgAAGACCGAGCTTCTGggggTACTGCGGCACGGGCGTGCTCTATGAGCAGGCTCAGCCCTAGGCTTAAGATGGCGGCGgCAG…	autophagy [GO:0006914]; cellular response to glucose starvation [GO:0042149]; cellular response to nutrient levels [GO:0031669]; cholesterol biosynthetic process [GO:0006695]; fatty acid biosynthetic process [GO:0006633]; fatty acid homeostasis [GO:0055089]; glucose homeostasis [GO:0042593]; lipid biosynthetic process [GO:0008610]; negative regulation of apoptotic process [GO:0043066]; negative r…	ann.char.bf
Protein AAR2 homolog	AAR2_HUMAN	isogroup07579	1	isotig11968	1479	AGAGACTCCTGAAcATCCTGTGCcGCTCAGAGGAGGCCATGGGgAAGTACCAGGAcCTTTACATCAACCTCATTTCTGTGCTGTATCACCAGCTCAACGAAATCCCAGCAGATTTTTTtGTGGACATTGTCTCCCAAGACAACTTTTtAACCAGCACCTTACAGGTGCTGTTCTCCTGCACCTGCAGCTCTGCTGTGGATGAGACTCTGAGGAAAAaGGCTGAGAAGTTCAAGGCTCACCTGACAAAGAaGTTCAAGTGGgACTTTGAGGCAGAGCCTGATGACTGTGCCCCTgTGGTGGTCCAGCTGCCTGAGGGTGTGCaGGTGGACTGAGCCAAAGGcccccttaGGAGCAAACAGcTTCTGAAATGaCCCTTTCcTTCTCTtCTCcAGCCTtGCC…	spliceosomal tri-snRNP complex assembly [GO:0000244]	ann.char.bf
Alanyl-tRNA editing protein Aarsd1	AASD1_MOUSE	isogroup11524	1	isotig15913	940	ATGGgAGcTGGGCcgTCAGCGAaGtGTCATTGAGCTGgaCACCCCcTCGGTGACAGCAGAGCAGGTCGAGGCccTGGAGAAGAGTGTGAACGAGAAAATCCGGGACAGGGTCCCTGTAACAGTGAGGGAACTGGCTGCAGATGACCCTGAAGTTGAAACAGTGAGGAGCCGGGGGCTGCCCGATGACCACGTGGGGCCAGTGCGTGTGGTGGACATCAAAGGCATTGACTCCAACCTCTGCTGTGGGACTCATGTCAGCAACCTGAGTGACCTCCAGGTTATTAAACTCCTTGGCGTGGAAAAAGGGAAAAAGAACAAAaCCAACTTGGTTTTCTTGGCGGGAAACAGAGTGCTGAAGTCAATTGAACAAAGTCACAGTACTGAGAAGGCTCTTACCTC…	alanyl-tRNA aminoacylation [GO:0006419]; regulation of translational fidelity [GO:0006450]	ann.char.bf
Alpha-aminoadipic semialdehyde synthase, mitochondrial	AASS_BOVIN	isogroup00370	4	isotig02381	5079	TTTATGTGGCATGGTTCTCATTTCTTTCTACTGAACTTCAACATTGTTTCTTCAGGAGACTcTTTTATTTCCTTCTTTGGAATCCGGTGACGTGGATACACCTCATAAAAGGATATTAAATGGTGCCTAAATGCATAATGGGTCAAGAACAAGTTTAAGGTCACAGACTGCTTTAAATTTCTCCTTCTCTGGTTTTATGTAGACTTTCTTTAGAAGTAAaGTATTAaTaTAAAAACATAGGAAAAaTATCTGGGATGATATGAGGCTTCAgTCAGTCTCTGCAGTTtCTAACTGTGCATATTTGCAATTAAGACTGATGGTCCAGTTTTCTTTTTTTTTtAACAACAGGAATGATCAACATTCTACATGGATTGGGTTTACGATTTTTAGCTCTGGGTC…	generation of precursor metabolites and energy [GO:0006091]; L-lysine catabolic process to acetyl-CoA via saccharopine [GO:0033512]; lysine biosynthetic process via aminoadipic acid [GO:0019878]	ann.char.bf
Alpha-aminoadipic semialdehyde synthase, mitochondrial	AASS_BOVIN	isogroup00370	4	isotig02382	4999	TGAAAAGGAATACGTCAAAGCAGGTGCCattATCCAAGAAGATATTTCTGAGGCTTCTCTGATAATAGGTGTGAAGAGACCTCCAGAGGACAAATTAATCCcTAAAaGAaCTATGCCTTCTTCTCACACACTATTAAAGCCCAAGAGgCAAACaTGCCCCTTTtGgAtGAGATTTtAAGACAGGAAATTCGACTGTTTGACTATGAAAAAATGGTtGATCATAAAGGAATGCGAGTTGTGGCCTTTGGAAAGTGGgCTGGTGTAGCAGGAATGATCAACATTCTACATGGATTGGGTTTACGATTTTTAGCTCTGGGTCATCACACACCCTTCATGCACATTGGGATGGCACATAACTACAGGAATAGCAGTCAGGCTGTACAGGCAGTACGGGATGCT…	generation of precursor metabolites and energy [GO:0006091]; L-lysine catabolic process to acetyl-CoA via saccharopine [GO:0033512]; lysine biosynthetic process via aminoadipic acid [GO:0019878]	ann.char.bf
Alpha-aminoadipic semialdehyde synthase, mitochondrial	AASS_BOVIN	isogroup00370	4	isotig02384	1279	TGAAAAGGAATACGTCAAAGCAGGTGCCattATCCAAGAAGATATTTCTGAGGCTTCTCTGATAATAGGTGTGAAGAGACCTCCAGAGGACAAATTAATCCcTAAAaGAaCTATGCCTTCTTCTCACACACTATTAAAGCCCAAGAGgCAAACaTGCCCCTTTtGgAtGAGATTTtAAGACAGGAAATTCGACTGTTTGACTATGAAAAAATGGTtGATCATAAAGGAATGCGAGTTGTGGCCTTTGGAAAGTGGgCTGGTGTAGCAGGAATGATCAACATTCTACATGGATTGGGTTTACGATTTTTAGCTCTGGGTCATCACACACCCTTCATGCACATTGGGATGGCACATAACTACAGGAATAGCAGTCAGGCTGTACAGGCAGTACGGGATGCT…	generation of precursor metabolites and energy [GO:0006091]; L-lysine catabolic process to acetyl-CoA via saccharopine [GO:0033512]; lysine biosynthetic process via aminoadipic acid [GO:0019878]	ann.char.bf
Alpha-aminoadipic semialdehyde synthase, mitochondrial	AASS_BOVIN	isogroup00370	4	isotig02383	1359	TTTATGTGGCATGGTTCTCATTTCTTTCTACTGAACTTCAACATTGTTTCTTCAGGAGACTcTTTTATTTCCTTCTTTGGAATCCGGTGACGTGGATACACCTCATAAAAGGATATTAAATGGTGCCTAAATGCATAATGGGTCAAGAACAAGTTTAAGGTCACAGACTGCTTTAAATTTCTCCTTCTCTGGTTTTATGTAGACTTTCTTTAGAAGTAAaGTATTAaTaTAAAAACATAGGAAAAaTATCTGGGATGATATGAGGCTTCAgTCAGTCTCTGCAGTTtCTAACTGTGCATATTTGCAATTAAGACTGATGGTCCAGTTTTCTTTTTTTTTtAACAACAGGAATGATCAACATTCTACATGGATTGGGTTTACGATTTTTAGCTCTGGGTC…	generation of precursor metabolites and energy [GO:0006091]; L-lysine catabolic process to acetyl-CoA via saccharopine [GO:0033512]; lysine biosynthetic process via aminoadipic acid [GO:0019878]	ann.char.bf
Aspartate aminotransferase, cytoplasmic	AATC_CHICK	isogroup07866	1	isotig12255	1427	GGGGAgTGTTCAGTCCcTGGgCGGGACGGGCGCTCTGCGGATCGGAGCCGAGTTCCTGAGGCGCTGGTACAATGGCAACAACAACACGGCCACCCCAATCTACGTCTCTGCTCCATCCTGGGAGAACCACAATTCTGTGTTTATGGATGCTGGTTTCAAAGATATTAGAACCTATCACTACTGGGATGCTGCCAAGAGAGGTCTGGATCTCCAGGGGTTGCTGAATGACATGGAGAGTGCCCCAGAGTTCTCCGTTTTCATCCTCCATGCCTGTGCGCACAACCCAACAGGCACAGACCCTACCCCCGAGCAGTGGAAGCAGATTGCTGCTGTCATGAAGCGCCGGAGCCTGTTTCCATTCTTCGACTCGGCCTACCAAGGGTTTGCCTCTGGCAGCCT…	2-oxoglutarate metabolic process [GO:0006103]; aspartate biosynthetic process [GO:0006532]; aspartate metabolic process [GO:0006531]; cellular amino acid metabolic process [GO:0006520]; gluconeogenesis [GO:0006094]; glutamate metabolic process [GO:0006536]; glycerol biosynthetic process [GO:0006114]	ann.char.bf
Protein AATF	AATF_CHICK	isogroup10547	1	isotig14936	1045	GGAGgAaGCAACAGTTGCTAAAGTGATTGACAGATTTGAGGATGAAACCACGGATGAGATTTTGCCTGTTGGCAATATCAGGAAAAGAGCTTCAGCCTCTCTCCTGGAGGCTGATAAGAGGTACAGTGGAAAAGCCACATCCAGGAAAGCTTTGCAGGAAGAGCTCTGGGGAGATGCTCTGTCTGAAGAAGGATCTGCTGAAGATGCATTAGATGACTGGTACAGTGACACTGAAGGCTCAGAAGAGGAGGACAGTGTTGGCACTAAGGCCAGGGAGAAGCCCAGCAGTGCTGGCAGTGAGCAGGAGGATGATTTGGAGGATGGTGAAGAGGAGGAGCAGCCTGAACAGGCCAAGGCACCAGAGTTCAGCTTCCAGAATATCACAGACTTGGAGAAGTT…	cell adhesion [GO:0007155]; cellular response to DNA damage stimulus [GO:0006974]; embryonic cleavage [GO:0040016]; negative regulation of amyloid precursor protein biosynthetic process [GO:0042985]; negative regulation of apoptotic process [GO:0043066]; negative regulation of superoxide anion generation [GO:0032929]; positive regulation of transcription from RNA polymerase II promoter [GO:004594…	ann.char.bf
Abhydrolase domain-containing protein 12B	AB12B_HUMAN	isogroup08217	1	isotig12606	1368	CGTGGACTTTCGGCGGCCGGAGCTGCTGGTGAACAACACCATCAGCCTGTACCTCACCACCGAGCCGGGCGTCACAGTTGGGATCTGGCACACGGTGCCGGGCAGCAGAGGGGCCGAGGCGCAGGGCAAGGACCAGCGCTGGTTCGAGGAGGCTCTTGCTGATTCTCACCCcGTGATCATCTACCTGCACGGCAATGGGGgCACCAGGGCTGCGAGTCACCGTGTCCAGTTCTTGAAGACGATGGGGGCTGCTGACTTCCACATCCTGGCTCTCGACTACAGAGGCTATGGGGACTCCACTGGACACCCCTCAGAGAGTGGCTTCACCACAGATGTCCTGGCACTCTATGACTGGGTGAAAGCACGGAGTGGGAACAGCAGCATCATCTTCTGGGGACA…		ann.char
Alpha/beta hydrolase domain-containing protein 17A	AB17A_BOVIN	isogroup11168	1	isotig15557	968	GAGGTGTTCGTCACcAAGAGCAGCCGGGggAaCCgCGtCGGCTGCATGTACGTCCGCTGCGTGCCCGGCGCCAGGTACACGGTGCTCTTCTCCCACGGCAACGCCGTGGACCTGGGGCAGATGAGCAGCTTCTACATCGGGCTGGGCACCCGCATCAACTGCAACATCTTCTCCTACGACTACTCGGGCTACGGCGTGAGCACGGGCAAGCCCTCGGAGCGGAACCTCTACTCCGACATCGACGCTGCCTGGCAGGCGCTGCGCACACGGTACGGGATCAGCCCGGAGAACATCATTCTGTACGGGCAGAGCATcGGCACGGTGCCcACGGTTGACCTGGCcTCCCGCTACGAGTGCGCGGCCATCGTGCTGCACTCCCCGCTCACCTCCGGCATGCGC…		ann.char
Alpha/beta hydrolase domain-containing protein 17B	AB17B_HUMAN	isogroup06690	1	isotig11079	1668	GACTAGAAGATGAATAATCTTTCCTTTAGTGAGCTGTGTTGCCTGTTCTGTTGCCCACCATGCCCAGGGAAAATTGCCTCCAAGCTGGCGTTTTTACCTCCgGATCCCACATACAcACTGATGTGTGATGAGAGTGGTGGTCgCTGGACTTTGCATCTCTCTGAGAGAGCAGACTGGCAATATTCTTCTAGAGAAAAAGATGCCATTGAGTGCTTCATGACTAGAACATGTAAaGGCAaCAGGATTGCcTGTATGTTCGTGCGTTGCTCACCTAATGCCAAGTACACTTtGCTCTTCTCACATGGAAaTGCTGTTGACCTGGgTCAGATGAGCAGCTTTTATATAGGACTGGGCTCACGGATTAATTGTAACATATTCTCCTATGATTATTCTGGATAT…		ann.char
Alpha/beta hydrolase domain-containing protein 17C	AB17C_CHICK	isogroup03164	1	isotig07553	3565	TgCATGTTCGTCCGCTGTGCCCCCACTGGCCGGTACACGCTGCTCTtCTCGCACGGTAATGCTGTGGACCTGGGCCAGATGTGCAGCTTCTACATTGGCCTTGGCTCCCGCATCAACTGCAACGTCTTCTCCTATGACTACTCCGGCTACGGGGTGAGCACCGGCAAGCCCTCTGAGAAAAACCTGTATGCAGACATTGATGCAGCCTGGCAGGCCCTCAGGACAAGGTATGGTGTGAGCCCTGAGAACATTATCCTGTATGGTCAGAGCATTGGTACTGTCCCTACAGTAGACCTGGCATCTCGGTACGAGTGTGCAGCTGTGATCCTCCATTCTCCCCTGATGTCTGGATTACGGGTAGCTTTTCCTGACACCAGGAAAACCTATTGCTTTGATGCT…		ann.char
Amyloid beta A4 precursor protein-binding family B member 1-interacting protein	AB1IP_CHICK	isogroup13606	1	isotig17995	742	CGTGAATGTGTATTATGGTTATCAGCaCAAAGTGAAGTATAAGGCACCTACAGATCACTGCTTTGTCCTAAAGCATCCCCAGATTCAAAAGGAGtCCCAGTATATCAAGTACTTGTGCTGTGATGATAAAGCAACCcTGCATCAGTGGGTAACAGGAATAAGAATTGCcAAGTATGGCAAGACGCTCTATGACAATTACAAATGTGCAGTGAAGAaaGcTGGCTTGTCCTCTCATTGGGCAAACCAAAAAGTGGTGGAACCAGCTGCCCCTGGCCCTGCCCctGCAGGATCCTCATCAGCAGGTACTGTTCAGTCAAATGGACAGATTCCCCAAAGTGTTTGTCATTCCAGTGCAGAATTTCCAGACACTCAGAAGAAAGTGGAAACATCTGAGGCACA…	signal transduction [GO:0007165]	ann.char.bf
ATP-binding cassette sub-family A member 8-A	ABC8A_MOUSE	isogroup16087	1	isotig20476	538	AGCCAAACAGAGCTGCAGCCTCGAGGAGTACAGCTTCTCCTTGAACACTCTGACTCAGGTGTTTCTGGAGCTCTCCCGAGAGCAGGAAAAGGATAATTTTGATCTGACTTTGGATGGGACTTTTGACTGGAAGCAGCTGCAGCAGGAGGACTGTTAAATGCTCATTTCTGCAGTGCTCAGTATTAACCACACTGCACACATTTCCTGCCACTCCCAGTGCACCAGGGAGAGGGGAACAGGCTCCTCTCTGATGCAGATGCTCCTCCTGCACTCTGCAGGTCCCAGCCCTGCTCCAAGCTGTcTTGGTAGAACAGTGCTCTGGTGAGAGCTCTAAGCCAGGCAGGATGAAGCAGAAGGACAGAAAGCTTTGCAGAAAGAAGGGTCCTAATCCATCTCTGG…	lipid transport [GO:0006869]	ann.char.bf
ATP-binding cassette sub-family A member 1	ABCA1_HUMAN	isogroup02740	1	isotig07129	4513	GCCACCTTtGTCCTGGAGCTCTTCACCAACAATAAGCtGAAGGACATCAATGATATCCTGAAGTCTGTCTTCCTCATCTTCCCccACTtCTGCcTGGgCCGGGGACTCATTGACATGGTGAAAAaCCAGgCTATGGCTGATGCTCTAGAGAGATTTGGAGAGAATCGTTTTGTGTCCCcTCTGTCATGGGACCTGGTGGGAAGAAACCTCTTTGCCATGGCAGTAGAGGGTGTTGTGTTTTTtCTCATCACGGTGCTCATCCAGTACAGGTTCTTCATCAAACCCAGGCCTGTCTATGCCAAGCTGCCTCCTGTGAATGATGAAGATGAGGATGTAACCAGAGAGAGGCAGAGGATAATTAGTGGAGGAGGACAGAGTGACATTTTGGAAATCAAGGAG…	cellular response to cholesterol [GO:0071397]; cellular response to lipopolysaccharide [GO:0071222]; cellular response to retinoic acid [GO:0071300]; cholesterol efflux [GO:0033344]; cholesterol homeostasis [GO:0042632]; cholesterol metabolic process [GO:0008203]; endosomal transport [GO:0016197]; G-protein coupled receptor signaling pathway [GO:0007186]; high-density lipoprotein particle assembl…	ann.char.bf
ATP-binding cassette sub-family A member 2	ABCA2_MOUSE	isogroup06739	1	isotig11128	1659	TCCTTCTGCCTGCCTTTTtCGTCTGTGTGGCCATGACTGTGGCACTCTCCGTGCCCGAAATAGGTGACCTGCCACCCcTCATCCTCTCGCCATCCCAATACCATAACTACACTCAGCCCAAGGGCAACTTCATTCCTTACGCTAaCGAGgAGCGGCATGAGTACCGCCTTAGGCTGTCTCCTGATGCCAGCCCTCAGCAGCTGGTGAaCACTTTCCACCTGCCCTCTGGTGTGGGGgCCACCTGCGTGCTCAAGACACCCTTCAACAACACGCTGGACCAGCCCATGCAGACCCTCAACCTCAATAGCAATGAGACCAAAATGCTGGCAGCCAAGTACTTCGATGCCATGTGCATTGACTCCTTCACCCAAGGCCTTCCGCTTTCCAACTTCGTGCCAC…	cholesterol homeostasis [GO:0042632]; lipid transport [GO:0006869]; regulation of intracellular cholesterol transport [GO:0032383]; regulation of transcription from RNA polymerase II promoter [GO:0006357]; response to steroid hormone [GO:0048545]	ann.char.bf
ATP-binding cassette sub-family A member 10	ABCAA_HUMAN	isogroup01665	2	isotig05290	1376	CCGTGTTTTCCCTGCTCTTTGAAGAGCTACAGgTTCAcGgTGCTGTGCCACTTGGAGgCCATCAACTGCTTCCCAGTGCTGGTGAACGTCATCAGCAaCGCCCTGCTGAGAGCCCTCAGCTCCACCGGGCACATCCAGGTCTGGAGCCACCCCTTCTTCTCTCTGTTTCATCGAGGATACTGGGATTATTTTATGTCCTTTTATGTCATTTACATGCTGCTGCTATTCCCTGGTTTtCcTCCTCACTTTGCAATGGGCTACACGCAGGACTGCAAGGCAGGAGCTCGTGCCCAGCTCAGGATCTCAGGGCTCTTCCCCTCAGCCTACTGGTGTGGCCAGGCACTGGTGGACATCCCACTCTCCTGGATCCTGCTCTTCTCCATGTTTGGGCTCCAGTTT…	lipid transport [GO:0006869]	ann.char.bf
ATP-binding cassette sub-family B member 7, mitochondrial	ABCB7_RAT	isogroup03870	1	isotig08259	2832	GGGGcGCACAGATTCCACCAATCTGCAGGCAAAGATTATGGCACAGTCTGGGAGGgAATTATTCAAGGCCATTATTGGAGCATTCAGAGATCCTGCCCAGATGGCAGCTGGTAGAGAAGAGGATGTGTTGGCATGGCCATGCTGGTGGAGGGCTTCACACAGATCCAAAGGATGGGCTGAAGGAGATTGATGCCAAGAAGATCATCCAGGCCATGCTGTCCTACGTGTGGCCCAAGGACAGGCCAGACCTGCGTGCCAGGGTGCTCATTTCCCTGGGCCTCCTGGCCAGTGCCAAGGCCATGAATATTTTGGTTCCCTTCATGTTTAAGTATGCAGTGGACAGCCTCAACCAGGTGTCTGGGAACGTGCTGAACCTGGGCGATGCCCCAAGCACCGCGG…	cellular iron ion homeostasis [GO:0006879]	ann.char.bf
ATP-binding cassette sub-family B member 10, mitochondrial	ABCBA_HUMAN	isogroup05364	1	isotig09753	2056	CTCTTGCAGAAGCAAcACaGTTAGCTGAAGAGCGTATCGGAAACaTCAGAACAGTTCGAGCTTTtGGgCAAGAAGTGGCTGAAATGGAGAaGTATACAAaTAAAGTTGATTATGTGCTACAGCTGGCTAAAAAAGAGGCACTAGCTCGGGCAGGCTTCTTTGGAGCTACTGGCCTTTCTGGGAACTTAATTgTCcTCtCAGTGTTATACAAAGgAGgATTACTAaTGGGCAGTGCCTACATGACAGTTGGTGAACTCTCATCTTTCCTAATGTATGCTTTCTGGGTTGgCATAAGCATTGGAGGTCTAAGTTCCTTTTATTCTGAGCTAATGAAaGGACTTGGTGCTGGTGGACGTCTTTGGGAACTTATTGAAAGGAAGCCCCAACTTCCATTCAATG…	transport [GO:0006810]	ann.char.bf
Bile salt export pump	ABCBB_HUMAN	isogroup00416	4	isotig02566	1540	AGTTCAGGCAaaCAGGTTAAAaTAATGAAAATATGCTGGAAAATGGTTGGGAGCTTCACTGACTAATTGAATAGAGTCCTTGCAATTTGTTTATGATCCTATGATTTTTCACAATCACAGGACTTTTGGTTGAAGTAAATAATCATCATGTCTGACCCAGTAGTTCTGCGTAGCATCAAGAGATTGGGAGAGGATAATTATGCTTTTGACTCGGATGGCAAATGTAACAGCTTCAAGAAACCAGAAAATTTCTACGCATATGAAGAACCTTTTATAGAGAAGAAAAGTGAAAAGTCATCAAAGAAGAAAGAAAACAATGTTCGTGTTGGCTTCTTTCAGCTGTTTCGATTTTCATCCTCTATGGAGATTTTAATGATGGTTGCTGGTAGTTTGTGTGCT…	bile acid and bile salt transport [GO:0015721]; bile acid biosynthetic process [GO:0006699]; canalicular bile acid transport [GO:0015722]; transport [GO:0006810]	ann.char.bf
Bile salt export pump	ABCBB_HUMAN	isogroup00416	4	isotig02565	1550	AAaGAGTCCCACACATTGAAGTGAAAGCATTAGCAGTGGCTATCCTGaCTGAGATCCTGTGGCTTTCAACAAGTTGGGAGCAAGAGCCTACTGGAGGAGAGTTAACTGATGACACTTCATGAaCTGAaaGGACTTTTGGTTGAAGTAAATAATCATCATGTCTGACCCAGTAGTTCTGCGTAGCATCAAGAGATTGGGAGAGGATAATTATGCTTTTGACTCGGATGGCAAATGTAACAGCTTCAAGAAACCAGAAAATTTCTACGCATATGAAGAACCTTTTATAGAGAAGAAAAGTGAAAAGTCATCAAAGAAGAAAGAAAACAATGTTCGTGTTGGCTTCTTTCAGCTGTTTCGATTTTCATCCTCTATGGAGATTTTAATGATGGTTGCTGGTAG…	bile acid and bile salt transport [GO:0015721]; bile acid biosynthetic process [GO:0006699]; canalicular bile acid transport [GO:0015722]; transport [GO:0006810]	ann.char.bf
Bile salt export pump	ABCBB_HUMAN	isogroup02952	1	isotig07341	3927	aaGCACTTCATAAGGCTCGcctcgggcgCactgcGATCTccAtcgctCAccGccTGTCAGccATCaaagccgccgacgtcATCGtcgggttcgagcacggcagggctgTagagAGaggaactcacgaggaactcctgcagAggaaaggggtttatttcaccttggtgaccttacaaagcaaaggagatacagcACCTAaCAGaGAAGAAACAGAAACAGCAGAGGATAATGTGGTTGAGCCAAaTCTTgAGAATGtCcAGTCATTCAGCAGGGGAAGCTATCAGGCCAGTTTGCGAGCTTCACTTCGGCAGCGCTCAAGATCCCAGCTTTCTAATGTGGTCCCTGACcATCCACTGTCTATTGGAGGAGATCCTGCAGAGTCTTCCTATCTTATGCCTT…	bile acid and bile salt transport [GO:0015721]; bile acid biosynthetic process [GO:0006699]; canalicular bile acid transport [GO:0015722]; transport [GO:0006810]	ann.char.bf
Bile salt export pump	ABCBB_RABIT	isogroup00416	4	isotig02567	766	AAaGAGTCCCACACATTGAAGTGAAAGCATTAGCAGTGGCTATCCTGaCTGAGATCCTGTGGCTTTCAACAAGTTGGGAGCAAGAGCCTACTGGAGGAGAGTTAACTGATGACACTTCATGAaCTGAaaGGACTTTTGGTTGAAGTAAATAATCATCATGTCTGACCCAGTAGTTCTGCGTAGCATCAAGAGATTGGGAGAGGATAATTATGCTTTTGACTCGGATGGCAAATGTAACAGCTTCAAGAAACCAGAAAATTTCTACGCATATGAAGAACCTTTTATAGAGAAGAAAAGTGAAAAGTCATCAAAGAAGAAAGAAAACAATGTTCGTGTTGGCTTCTTTCAGCTGTTTCGATTTTCATCCTCTATGGAGATTTTAATGATGGTTGCTGGTAG…	bile acid and bile salt transport [GO:0015721]	ann.char.bf
Bile salt export pump	ABCBB_RABIT	isogroup00416	4	isotig02568	756	AGTTCAGGCAaaCAGGTTAAAaTAATGAAAATATGCTGGAAAATGGTTGGGAGCTTCACTGACTAATTGAATAGAGTCCTTGCAATTTGTTTATGATCCTATGATTTTTCACAATCACAGGACTTTTGGTTGAAGTAAATAATCATCATGTCTGACCCAGTAGTTCTGCGTAGCATCAAGAGATTGGGAGAGGATAATTATGCTTTTGACTCGGATGGCAAATGTAACAGCTTCAAGAAACCAGAAAATTTCTACGCATATGAAGAACCTTTTATAGAGAAGAAAAGTGAAAAGTCATCAAAGAAGAAAGAAAACAATGTTCGTGTTGGCTTCTTTCAGCTGTTTCGATTTTCATCCTCTATGGAGATTTTAATGATGGTTGCTGGTAGTTTGTGTGCT…	bile acid and bile salt transport [GO:0015721]	ann.char.bf
ATP-binding cassette sub-family C member 8	ABCC8_CRICR	isogroup02405	2	isotig06769	383	TAAGACACCACAAGGACACATTACAGACCCACACTTTGTAAAAATTTCTCATGTTTCTCTGCCCAGAATAATCCTCTACAGATAATCCAATCAGAAGAAGGAATATGAATATTCACTTGATGTTTTCTTTAACAGTCTGATTGTTTCTCTCCTGCTTATCTCCAGGGCATTAATCTgTCTGGAGGGCAGCGCCAGCGTATCAGCGTGGCACGAGCACTTTACCAGCAGACAAATGTTGTGTTCCTGGTGATCCTTTTTCTGCCCTGGATATCCActTGAGTGACCATCTCATGCAAGAAGGGATcCTGAAGATGCTGCGGGAGGACAaGAGGACCgTTGTGCTGGTGAcacACAaGCTGCAGTACTTGccccacgctgactgg		ann.char
ATP-binding cassette sub-family C member 8	ABCC8_CRICR	isogroup02405	2	isotig06770	356	TAAGACACCACAAGGACACATTACAGACCCACACTTTGTAAAAATTTCTCATGTTTCTCTGCCCAGAATAATCCTCTACAGATAATCCAATCAGAAGAAGGAATATGAATATTCACTTGATGTTTTCTTTAACAGTCTGATTGTTTCTCTCCTGCTTATCTCCAGGGCATTAATCTgTCTGGAGGGCAGCGCCAGCGTATCAGCGTGGCACGAGCACTTTACCAGCAGACAAATGTTGTGTTCCTGGTGAGTTGCTGTCCTCCAGTTTCTGATCCATGCAGAAGCACAGGCTACTCCTTCATTTAGAGCATTTCATGTGTCCTGTTCCTGCTCCATGCAGAaGCACAaGCTACTCC		ann.char
ATP-binding cassette sub-family C member 8	ABCC8_RAT	isogroup12476	1	isotig16865	845	GGTGTCTAACTACCTGAACTGGATGGTTCGTAACCTGGCTGACATGGAGATCCAGCTGGGGgCAGTGAAAAGAATCAATGGCCTTCTCAAAACAGAAGCTGAAAaTTATGAAGGgCTCCTCTCTTCCTCACAGATTCCCcAGAACTGGCCAGACAGAGGGGAGATCCAAATCCAGAACCTGAGTGTCCGATACGACAGCAACTTAAAGCCAGTGCTAAAACATGTCAATGCCCACATCTCACCAGGACAAAAGATTGGGATCTGTGGCCGAACAGGCAGTGGAAAATCCTCCTTCTCTCTtGCaTTTTTCAGGATGGTTGACACCTTTGAGGGGAGGATTATCATTGATGGAATAGATATTGCAAAGCTGCCCTTACAGACGCTGAGATCCAGGCTGTC…	cellular glucose homeostasis [GO:0001678]; cellular response to organic substance [GO:0071310]; female pregnancy [GO:0007565]; negative regulation of glial cell proliferation [GO:0060253]; negative regulation of insulin secretion [GO:0046676]; negative regulation of low-density lipoprotein particle clearance [GO:0010989]; negative regulation of neuroblast migration [GO:0061855]; negative regulati…	ann.char.bf
ATP-binding cassette sub-family D member 2	ABCD2_HUMAN	isogroup02551	1	isotig06940	5604	CAGTCCGTGGCGCATCTCTACTCCAACCTCACCAaGCCCAtCCTGgATGTtGTGCTCACCTCcTACACCCTCATCCGCACGGCGCGGTCGCGGGGGGCcAACCCCATCGGgCCCACAGTCCTGGCTGGCCTCGTCGTCTATGCCACGGCCCGCGTGCTCAAAGCCTGCTCGCCCAAGTTTGGCAAACTGGTGGCTGAGGAGGCTCACAAGAAGGGCTATCTGCGCTTCATACATTCACGTATCATTGCCAATGTGGAAGAGATTGCCTTTTACCGAGGGCACAAGGTAGAATTGAAACAACTGCAAAAAAGCTACAAGGATTTGACAGATCAGATGAATCTGATTTTGTCCAAACGTTTATGGTACATCATGATAGAGCAGTTCCTGATGAAGTATGTC…	fatty acid beta-oxidation [GO:0006635]; positive regulation of fatty acid beta-oxidation [GO:0032000]; transmembrane transport [GO:0055085]; very long-chain fatty acid catabolic process [GO:0042760]; very long-chain fatty acid metabolic process [GO:0000038]	ann.char.bf
ATP-binding cassette sub-family D member 3	ABCD3_HUMAN	isogroup02590	1	isotig06979	5275	TTGGAGGCaGAGAAAGCCCAACAaTTAAGGgTtAGCaGAGAAACAGCCTGTTTCTACAGGGAaCAGGAGGTTtGGCtGGGAaCGCCTTGTCGTGGTGTCTTGCCAAGGGCTGTCATCCGGGCGGCTCCGGGTCTGaTGTGCTCTGGGCAGCAGGGTGCAGCTGCCAGCTGAGAGGTGTAAAAGAAGTGGAAAACAAGCACTGCAGAATAATGAGCAGAAAGAGGGAAAGAAGGAGCGAGCAATGGTGGACAGAGTGTTTATTGCACGAATATGTCGAATCCTGAAAATAATGGTCCCTAGAACACTTTGCAAAGAGACAGGTTATTTGCTGCTTATTGCTGTGATGCTGGTAGTCCGAACTTACTGTGATATTTGGATGATTCAAAATGGAACAGTCAT…	fatty acid beta-oxidation [GO:0006635]; fatty acid biosynthetic process [GO:0006633]; peroxisomal long-chain fatty acid import [GO:0015910]; peroxisome organization [GO:0007031]; response to drug [GO:0042493]; response to organic cyclic compound [GO:0014070]; transmembrane transport [GO:0055085]; very long-chain fatty acid catabolic process [GO:0042760]	ann.char.bf
ATP-binding cassette sub-family D member 4	ABCD4_HUMAN	isogroup13545	1	isotig17934	746	AGTGCCTTGACAGAAGAGGTGGAGCATGAACTGTACCGAATGTGCCTTCAGCTGGGCATGACACTGATCAGTGTGGGACACAGACccAGCCTGGaaaaGTtccacAGCTGGATTTTGAAACTTCACGGGGAGGGAAGATGGGAGCTcTCTCGATGTGAGAAGATGAGGCGGCTCCCCTCTGAGGAAGAACACTGAAAAaCACGCCCTtGTCTGGCCAGCCACAGAACCTGCACATGTGTgAAaGAGCTCTCAATAGCAGACATGGAGCTGCCAAGCcAGCaGctGTGTCAAACAGTGCAAGACCAGTTCTGGATTTTGCTGATAGACACAGAGTATGTCTGAACTCATGGTGTGGAGTTCTGCCAAGAGTAGACAACTATGCCATCCTTCTCCCAGCCT…	cobalamin metabolic process [GO:0009235]; transmembrane transport [GO:0055085]	ann.char.bf
ATP-binding cassette sub-family E member 1	ABCE1_HUMAN	isogroup04653	1	isotig09042	2355	CGccccccTCACAGCTCCcGGTCTGGAAGACTCCCACTACTCCTTATAATTGGTGTATGTGTTTAACCCTAAATTGTGCATTATGGCAGACAAATTAACAAGAATTGCTATAGTCAACCATGACAAGTGTAAGCCAAAGAAATGTCGTCAGGAATGCAAGAAGAGTTGTCCTGTGGTTCGAATGGGAAAACTTTGCATAGAAGTCACATCACAGAGCAAAATAGCATGGATTTCAGAAACTCTTTGTATTGGTTGTGGTATTTGCATCAAGAAATGTCCTTTTGGAGCCTTGTCAATTGTTAACTTACCTAGCAACCTGGAGAAAGAAACAACgCATAGATACTGTGCCAATGCCTTCAAACTTCACAGGTTGCCTATCCCTCGTCCgGGTGAAGTACT…	negative regulation of endoribonuclease activity [GO:0060702]; regulation of type I interferon-mediated signaling pathway [GO:0060338]; ribosomal subunit export from nucleus [GO:0000054]; translational initiation [GO:0006413]; translational termination [GO:0006415]; viral process [GO:0016032]	ann.char.bf
ATP-binding cassette sub-family F member 1	ABCF1_RAT	isogroup17274	1	isotig21663	237	TCAaCGAGTACAAAGgAGCGGTGATCGTGGTCAGCCACGACGCGCGGCtCATCACCGaGACCAACTGCCAGCTGTGGGTGGTGGAGGAGCAGGGCCTGAGCCAGATCGACGGCGACTTCGACGACTACAAGAGGGAGGTGCTGGAGGCCCTGGGCGAGGTCGTGGTGCACCGGCCaCGGGAGTGACCcTGAGTGACCACTGAGTGACCACTGACCGCCcAGTGAgcaCCcAGTGAcc	positive regulation of translation [GO:0045727]; translation [GO:0006412]; translational initiation [GO:0006413]	ann.char.bf
ATP-binding cassette sub-family F member 2	ABCF2_MOUSE	isogroup05284	1	isotig09673	2089	AAAGGAGCTGGAGGACTTTGAATTAAAGAAAGCTGCtGCCCGAGCTGTGACAGGAGTGCtGGCCTCCCACCCTAACAGCACTGATGTGCATATCATCAACCTCTCACTGACCTTTcATGGCCaGgAGCTGCtGAGTGACACCAAaCTGGAGCTGAACTCTGGGAGACGCTATGGCCTGATTGGACTCAATGGGATTGGGAAGTCCATGCTTTTGTCAGCTATTGGGAAGCGAGAAGTGCCCATCCCAGAGCACATTGACATCtATCACCTGACCCGAGAGATGCCTCCCAGTGACAAGACCCCTCTGCAGTGTGTGATGGAGGTGGACACCGAGAGGGCCATGCTGGAGCGAGAAGCGGAACGTTTAGCTCATGAAGACGCGGAATGTGAGAAACTCTT…		ann.char
ATP-binding cassette sub-family F member 3	ABCF3_MOUSE	isogroup12140	1	isotig16529	876	GTTACTGGCAAGAAAGTTCCCAGGgAAGACAGAGGAGGAGTACCGGCACCAGCTGGGGAGGTACGGCGTGTCCGGAGAGCTGGCCGTGCGTCCCGTGGCCAGCCTGTCCGGGGgTCAGAaGAGTCGAGTGGCCTTtGCCCAGATGACTATGCCCTGTCCAAACTTCTACATCCTGGATGAGCCAACAAATCACCTGGACATGGAGACCATTGAGgCACTGGCAAAGGCACTGAATAACTTCCGGGGTGGCATAaTCCTGGTGTCCCATGATGAACGCTTCATCcGCCTGGTGTGCCACGAGCTGTGGGTGTGTGAGAACGCCACCGTGACACGCATCGAGGGTGGCTTTGACCAGTACAGAGAcATCCTGAAGGAGCAGTTCCGCAAGGAGGGTTTCCT…	defense response to virus [GO:0051607]	ann.char.bf
ATP-binding cassette sub-family G member 2	ABCG2_HUMAN	isogroup03983	1	isotig08372	2736	AGGAAGGAGCGGGCAACTTCCAaCGTtCTGTTCCAACACAAGAGTCCCTCCGATCTCCTCGTGGCTCTGTTGTGAGTTTCCATAACATCCAGTACTCCGTTAAGCAGTCCAGTGGATTCCTTTGTAAACGGAAAAcCaTGGAAAAGAAGATCCTTCACAATGTTAATGGCATTATGAAACCAGGCTTGAATGCTATCCTGGGgCCAACAGGGAGTGGGAAATCTTCTCTCCTAGATGTGCTGGCTGCCAGAAAGGACCCaGCAGGTCTCTCTGGAGAAGTGCTTATAGATGGCATCCcACAACcTCCAAATTTCAAGTGCATCTCAGGATATGTTGTGCAGGATGATGTTGTTATGGGCACGATGACAGTGAGGGAGAACCTGCAATTCTCTGCTGCGC…	cellular iron ion homeostasis [GO:0006879]; cholesterol efflux [GO:0033344]; response to drug [GO:0042493]; transport [GO:0006810]; urate metabolic process [GO:0046415]	ann.char.bf
ATP-binding cassette sub-family G member 2	ABCG2_HUMAN	isogroup04272	1	isotig08661	2542	GGgCaGGAAGCGTGCTCACCTtCCACAACATCTGCTACCGCGTCAAGACAaaGTCCGGGCACCTgTGCTTCCGAAAAACTGCTGAAAAaGAAGTtCTGAGAGATGTCAATGGCATCATGAAACCAGGaCTaaaTGCAATTTTGGGACCCACTGGCAGTGgCAAATCTTCGCTACTGgACATtCTGGCTGcAaGGAAGgATCCCCATGGGcTCtCTGGTGACATTTtGATCAAtGGAGCTCCTCAGCCtGCCAACTTtAAATGCaCCTCTGGgTAcGTGGTACAGGATGATGTGGTGATGGGAACCCTGACTGTAaGAGAAAATCTGAAGTTCTCAGCAGCACTCCGCTtGCCAAAGTCAGTGAAGGAGAAGGAGAAAAATGAaCGAGTGAATCAGGTCA…	cellular iron ion homeostasis [GO:0006879]; cholesterol efflux [GO:0033344]; response to drug [GO:0042493]; transport [GO:0006810]; urate metabolic process [GO:0046415]	ann.char.bf
ATP-binding cassette sub-family G member 5	ABCG5_HUMAN	isogroup01296	2	isotig04551	2481	CGGCAGATACTtAAGGATGTTTCATTtCACATAGAAaGTGGCCAGATTATGGGGATTTtAGGAAATtCTGGATCTGGGAAAACAACACTTCTGGATGCAATATCAGGAAGACTGGGACATAAAGACAACTTCTTTGGTGAAGTGTATCTGAATGGACATCAGCTGAAGAGGGAACAGTTCAGAGATTGCTTCTCTTATGTGCCACAGAGTGACACTTTGTTAAGCTTTCTCACCATACAGGAGTCTTTGACCTACACAGCTTTaCTAACTCTTAAGAATTGCTCCAATAGCTCCATCAAAAaGAAGGTAGATGCAGTTATGGCTGAGCTGAGTCTCAGCCACATTGCTGATAAAATAATTGGAAGCCAGAACGTTGCAGGAATTTCTGGGGgTgAGAGG…	cholesterol efflux [GO:0033344]; cholesterol homeostasis [GO:0042632]; drug transmembrane transport [GO:0006855]; excretion [GO:0007588]; intestinal cholesterol absorption [GO:0030299]; negative regulation of intestinal cholesterol absorption [GO:0045796]; negative regulation of intestinal phytosterol absorption [GO:0010949]; response to ionizing radiation [GO:0010212]; response to nutrient [GO:0…	ann.char.bf
ATP-binding cassette sub-family G member 5	ABCG5_HUMAN	isogroup01296	2	isotig04552	2145	CGGCAGATACTtAAGGATGTTTCATTtCACATAGAAaGTGGCCAGATTATGGGGATTTtAGGAAATtCTGGATCTGGGAAAACAACACTTCTGGATGCAATATCAGGAAGACTGGGACATAAAGACAACTTCTTTGGTGAAGTGTATCTGAATGGACATCAGCTGAAGAGGGAACAGTTCAGAGATTGCTTCTCTTATGTGCCACAGAGTGACACTTTGTTAAGCTTTCTCACCATACAGGAGTCTTTGACCTACACAGCTTTaCTAACTCTTAAGAATTGCTCCAATAGCTCCATCAAAAaGAAGGTAGATGCAGTTATGGCTGAGCTGAGTCTCAGCCACATTGCTGATAAAATAATTGGAAGCCAGAACGTTGCAGGAATTTCTGGGGgTgAGAGG…	cholesterol efflux [GO:0033344]; cholesterol homeostasis [GO:0042632]; drug transmembrane transport [GO:0006855]; excretion [GO:0007588]; intestinal cholesterol absorption [GO:0030299]; negative regulation of intestinal cholesterol absorption [GO:0045796]; negative regulation of intestinal phytosterol absorption [GO:0010949]; response to ionizing radiation [GO:0010212]; response to nutrient [GO:0…	ann.char.bf
ATP-binding cassette sub-family G member 8	ABCG8_MOUSE	isogroup14208	1	isotig18597	694	TTAAaGCAGTTCAGTATATTATtAAGTCGTCAGGTCTCCAATGACTTCAGAGATCTTTCAACATtATTAATCcATGGATTTGAAGCCCTTCTtAtGTCATTACTAATtGGATTTTTGTACtATGGCcATGAAAAAAAacGGACTCTCTATTCGTGACACAACAGCaCTGCTGTACATGATAGGTGCCctAAtCCCATTCACAATAATTTTGGATGTTGTTGCCAAATGTCATTCAGAAAGAGCAATGCTTTATCATGACTTGGAAGGTGGAATGTACTCTGTTAGCCCGTACTTCTTTGCTAAGATTTTGGGGgAGCTCCCAGAACACTGCGTTTTTGTTATAATTTATGGGGTTCCCATCTACTGGCTGGCAAACCTTGTTCCTGAGCCAGAGCATTT…	cholesterol efflux [GO:0033344]; cholesterol homeostasis [GO:0042632]; excretion [GO:0007588]; intestinal cholesterol absorption [GO:0030299]; negative regulation of intestinal cholesterol absorption [GO:0045796]; negative regulation of intestinal phytosterol absorption [GO:0010949]; phospholipid transport [GO:0015914]; response to drug [GO:0042493]; response to nutrient [GO:0007584]; sterol home…	ann.char.bf
ATP-binding cassette sub-family G member 8	ABCG8_RAT	isogroup08784	1	isotig13173	1275	AGAGAGCAGCGCGCCAGGAGCAATGGTGCTGCGGTGAGGGTACCTGGAAAGGACCGCGTTCCAAACCAAGAGAAGGATTTCCACAGCTTTCAGAGAGACCACAGTCAAACCACTGCAGCtGCaGAGACCTTCCACCACCATGAAGGAAACTACTGACAGTGTCTCTCTGGACGATGCCAGCTGGAGCCAGACCAAGACCCAGGATACTATTTTTCACTCTGAAGAAGATAACAGTCTTTATTTCACATACAGTGGAAAATCAAaTGTTCTGGAGGTCAAAGAACTCAACTACCAGGTTAACACAGCATCCCAGATTCCCTGGTATGAGAACCTTGCTCAGATGAAGATGCCCTGGACCTGGAAATCAGATCCCCATTCCCACATGtCAGTAATCCAAAA…	cholesterol efflux [GO:0033344]; cholesterol homeostasis [GO:0042632]; cholesterol transport [GO:0030301]; excretion [GO:0007588]; negative regulation of intestinal cholesterol absorption [GO:0045796]; negative regulation of intestinal phytosterol absorption [GO:0010949]; phospholipid transport [GO:0015914]; regulation of intestinal cholesterol absorption [GO:0030300]; response to drug [GO:004249…	ann.char.bf
Monoacylglycerol lipase ABHD12	ABD12_CHICK	isogroup03760	1	isotig08149	2920	GATACGGGTTATGGTTCCGATTGAGGAAGTTAATACTCTGGCTGCTGGGAGTGTACATAGCCATCCCATTTCTAGTAAAACTTTGCCCTGCTATTCAGGCAAAGCTGGTCTTCCTAAACTTTGTGAGAGTCCCGTATTTCATTGACTtGAAAAGGCCACAGGATCAAGGTTTaAACCACACCTGTAATTATTACTTGCAGCCAGAGGAGGATGTAACCATTGGAGTCTGGCACACGGTCCCTGCAGCCTTGTGGAAGAATGCCCGAGGGAAGGACCAGCTGTGGTTCGAAGAGGCCTTGGGCTCCAGCCACCCTGTAATCCTTTACCTGCACGGCAATGCAGGAACAAGAGGAGGGGATCACCGGGTGGAGCTTTACAAGGTTCTCAGCTCCCTCGGGT…	acylglycerol catabolic process [GO:0046464]; adult walking behavior [GO:0007628]; monoacylglycerol catabolic process [GO:0052651]; phosphatidylserine catabolic process [GO:0006660]; response to auditory stimulus [GO:0010996]	ann.char.bf
Homeobox protein abdominal-A homolog	ABDA_ARTSF	isogroup00527	3	isotig02922	1938	CAGGAAaCTTtCtGAaCTTTGTtGTtGGCTCTgCTGGAAAAaaGaaaaaacGgAAaTCCAAGCTGGGgTGGATTGGGGGgCTGAGAACAGCGAGGAAACCTCAAAAATAAAGGATtAAATCAAATtAAaGgAAaTTTTtAAAaTTAAGGgAAATATCAGCGCAGGTCGTGCAGGGTTTCACCCCTGGAGGAgCAGCACAGCAACCAGAGCAAAAaGAAataTTAAAAAAaTGAATTTAAATCACCTGAaGTGaCCcAAATCTGTGTTTTTTtGGGCAGGAACGGACAGAAAACGCGGCCGCCAGACCTACACCAGGTACCAGACcCTGGAGCTGGAGAAGGAGTTTCACTACAACCGGTACCTGACccGccGcAGGAGGATCGAGATCGCGCACTCGCT…	multicellular organism development [GO:0007275]; regulation of transcription, DNA-templated [GO:0006355]	ann.char.bf
Homeobox protein abdominal-A homolog	ABDA_ARTSF	isogroup00527	3	isotig02923	1735	CAGGAAaCTTtCtGAaCTTTGTtGTtGGCTCTgCTGGAAAAaaGaaaaaacGgAAaTCCAAGCTGGGgTGGATTGGGGGgCTGAGAACAGCGAGGAAACCTCAAAAATAAAGGATtAAATCAAATtAAaGgAAaTTTTtAAAaTTAAGGgAAATATCAGCGCAGGTCGTGCAGGGTTTCACCCCTGGAGGAgCAGCACAGCAACCAGAGCAAAAaGAAataTTAAAAAAaTGAATTTAAATCACCTGAaGTGaCCcAAATCTGTGTTTTTTtGGGCAGGAACGGACAGAAAACGCGGCCGCCAGACCTACACCAGGTACCAGACcCTGGAGCTGGAGAAGGAGTTTCACTACAACCGGTACCTGACccGccGcAGGAGGATCGAGATCGCGCACTCGCT…	multicellular organism development [GO:0007275]; regulation of transcription, DNA-templated [GO:0006355]	ann.char.bf
Probable C->U-editing enzyme APOBEC-2	ABEC2_HUMAN	isogroup08946	1	isotig13335	1250	AGAAaTTTTTCTTTCTCTCTCCCAGTGGCCACAGCTCGGTCCCAGTGTCCTGGGGAAGATGGCAGAGAAGCAGGAGGAGCCCAGCAATGCCCAGAACGGGGAGCCCGACAATGCCGAGGAGGGCGAGGGGAAGAAGAAGAAGGTGAAGAGGGAGGACCTGCCACCCTTTGAGATTGTGACAGGGGAACGCCTCCCAGCCATCTTCTTCAAATTCCAGTTCAGGAACGTGGAGTACAGCTCGGGCAGGAACAAAACCTTCCTGTGCTACGTGGTGGAGACGCAGGGCAAGGAGGCGGCCACCAGCCGCGGCTACCTGGAGGACGAGCACGCTGCCGCGCACGCCGAGATGGCGTTTTTCAACAACATCCTGCCCAAGTGCCAGGCGGGTGCTCGCCACGA…	cytidine to uridine editing [GO:0016554]; DNA demethylation [GO:0080111]; mRNA modification [GO:0016556]; mRNA processing [GO:0006397]	ann.char.bf
Abhydrolase domain-containing protein 2	ABHD2_MOUSE	isogroup00691	2	isotig03384	6703	AGACGGGCGGGAGCGGCGGCGGGAGCTGTCGGGGCTTCGCGCCCGGCCGGGGCTGCAGGGTAGCTCAGGCAGCACGTGGATCGGTGACAAGTCTGCTGAGGACTGGCAATTTCTTCTAGCTTGAAGAAAATTGAAACTGGCTGAAAATGAGTGCAATATTGGAAACCTCTGAGCTGCCAGCAGTGTTTGATGGGGTGAAGCTAGCTGCAGTTGCTGCTGTTCTGTACGTTATTGTTCGCTGCTTGAATTTGAAAAGCCCGACTGCCCCTCCTGAACTCATTTACCAGGACTCTGCTTTGGCTCGCTTTCTACTCAAATCCTGCCCACTTCTGACCAAAGAGTACATTCCACCCCTCATCTGGGgAAAGAGTGGACATATCCAGACAGCTCTTTATGGAA…	acrosome reaction [GO:0007340]; acylglycerol catabolic process [GO:0046464]; negative regulation of cell migration [GO:0030336]; response to progesterone [GO:0032570]; response to wounding [GO:0009611]; sperm capacitation [GO:0048240]; steroid hormone mediated signaling pathway [GO:0043401]	ann.char.bf
Abhydrolase domain-containing protein 2	ABHD2_MOUSE	isogroup00691	2	isotig03383	6703	AGACGGGCGGGAGCGGCGGCGGGAGCTGTCGGGGCTTCGCGCCCGGCCGGGGCTGCAGGGTAGCTCAGGCAGCACGTGGATCGGTGACAAGTCTGCTGAGGACTGGCAATTTCTTCTAGCTTGAAGAAAATTGAAACTGGCTGAAAATGAGTGCAATATTGGAAACCTCTGAGCTGCCAGCAGTGTTTGATGGGGTGAAGCTAGCTGCAGTTGCTGCTGTTCTGTACGTTATTGTTCGCTGCTTGAATTTGAAAAGCCCGACTGCCCCTCCTGAACTCATTTACCAGGACTCTGCTTTGGCTCGCTTTCTACTCAAATCCTGCCCACTTCTGACCAAAGAGTACATTCCACCCCTCATCTGGGgAAAGAGTGGACATATCCAGACAGCTCTTTATGGAA…	acrosome reaction [GO:0007340]; acylglycerol catabolic process [GO:0046464]; negative regulation of cell migration [GO:0030336]; response to progesterone [GO:0032570]; response to wounding [GO:0009611]; sperm capacitation [GO:0048240]; steroid hormone mediated signaling pathway [GO:0043401]	ann.char.bf
Abhydrolase domain-containing protein 3	ABHD3_HUMAN	isogroup03429	1	isotig07818	3192	GGTGGgCTCGCCCGCGGCAGCCGGGGTGTGGTGTCCTGCCGAGCCGTCCCCCGTGTGCGATGGACTGGCAGGTGCTGACCAGGGAGCTCTCCCTCTATCTGGAGAGCCAGGTCCGCGTGGGCTTCTTCGGCTCCGGCGTGGGCTTGTCCCTGGTGCTGGGTTTCGGCGTCGCCTACGCCTGCTACTACCTCAACAGCATCGCCAAGAAACCCCAGCTGGTGGCAAGCAATGACCGTTTCTGCCGCTTtCTCGAGGAGTATTGCCCTGTTGTGACAGAAACTTACTATCCCACAATTTGGTGCTGGGAAGGTCGGGTACAGACACTCCTGCGCCCCTTTATCACATCTAGGCCCCAAGTACAGTACAGGAATGAGCTCATTAAAACAGCAGATGGAGGAC…	phosphatidylcholine biosynthetic process [GO:0006656]; phosphatidylcholine metabolic process [GO:0046470]	ann.char.bf
1-acylglycerol-3-phosphate O-acyltransferase ABHD5	ABHD5_HUMAN	isogroup04005	1	isotig08394	2719	CCGCCGCCATGGCCGAGGAGGAGGCTTCCAGCGAAGGgTTTGGATGGTTGTTTAGCTGGCTTCCTGCCTGGTGTCCCACGTCACTGCTGCACCTTAAAGAGGCTGAGGACAAAATGCTGAAATGTATTTCAAGCACATACAATAAACGATATGTGTATATATCTAATGGAAATAAAATATGGACACTAACaTTCTCTCCAGACCTTTCAAATAAAACTCCACTTGTTCTCCTGCATGGGTTTGGAGGAGGTGTTGGACTGTGGGCTCTCAACTTTGAAGATCTCTGTGAGAACAGgACGGTTCATGCTTTTGACCTCTTGGGATTTGGGCGTAGCAGTCGACCACACTTTGACACTGATGCTCGGGAAGCAGAAAATCAGTTTGTGGAATCCATAGAAG…	cell differentiation [GO:0030154]; fatty acid metabolic process [GO:0006631]; negative regulation of sequestering of triglyceride [GO:0010891]; phosphatidic acid biosynthetic process [GO:0006654]; positive regulation of lipoprotein lipase activity [GO:0051006]; positive regulation of triglyceride catabolic process [GO:0010898]	ann.char.bf
Monoacylglycerol lipase ABHD6	ABHD6_MOUSE	isogroup03767	1	isotig08156	2920	TGATGGTTTAAATACCCGCAGCTCACCGGGCCGAGCcTGAAGGGAGGAGTGACGGCAGGGCTGCGATTTTGAcCTTGCTGTTTTTTtCCTCTTCTGACAGTGTTTTCAGCTGCCCACAGCGAGCAGCACTTGTGCCGAGAGGAGGAGGGGAACTCTGCAAGGCAGGTGAGGCTGAGTAGTGAAGAGCAGCATGGACCTGGATTTGCTGAACATGTTTGTCATTGCTGGTGGCACCCTGGCCATCCCCATCCTGGCCTTCGTGGCCTCATTCCTCCTCTGGCCCTCGGCGCTCATCCGCATCTACTACTGGTACTGGCGCCGAGCCTTGGGCATGCAGGTCAGATATGCAAACTAtGATGACTACCAGTTTTGTTATTCCTATAGAGGAAGGCCTGGATA…	acylglycerol catabolic process [GO:0046464]; long term synaptic depression [GO:0060292]; negative regulation of cell migration [GO:0030336]; phospholipid catabolic process [GO:0009395]; positive regulation of lipid biosynthetic process [GO:0046889]; regulation of endocannabinoid signaling pathway [GO:2000124]	ann.char.bf
Mycophenolic acid acyl-glucuronide esterase, mitochondrial	ABHDA_MOUSE	isogroup07953	1	isotig12342	1412	ATATTGCTTATCAGAAAATTAAAGGGaGGAaTCCAGGGGTTATTTTCCTTCCAGGCTTCAATTCAAATATGCATGGTCAGAAAGCAACTGCCCTTGAAGATTTCTGCAAATCATTAGGTCATGCCTTCATCAGATTTGACTATACAGGATGTGGAAGTTCACATGGTAAATTTGAAGAGTGTACAATTGGGAAGTGGAGAAAAGATGTTCTGTCTATACTGGATGAACTTACAGATGGACCACAGATTCTGGTGGGCTCCAGCATGGGTGGATGGCTGATGCTTCATGCTGCAATAGCACGCCCAGATAAAGTAGCTGCTCTGGTTGGAGTAGCTGTAGCAGCAGATCACGTTGTAACAACTTTTAAGGGGCTTCCCATTGAGGCACAAAAAGAAATAG…	glucuronoside catabolic process [GO:0019391]	ann.char.bf
Alpha/beta hydrolase domain-containing protein 13	ABHDD_CHICK	isogroup04857	1	isotig09246	2251	GCTGTGGATaTTGGCTGTTTGCCAGAGCCAGGAAATGTGTGCCGCTTAAGTTATtCTTACGgCAGAGATGAAGCCTGGGAAATCATCACATCTGAAGGATTTACTTGGAGTAAAAGATCACTGACTTCTACAATGGAAAAaTCATGGATGCTTtGGACCTTtGTtAAAaGATGGCTACTAGCTTTGGCTTCCTGGTCTTGGAGTCTCTGCCGTATTTGTCTTTTGCCCTTGATAGTGACCTTTCACTTGTACGGAGGCATTATACTCCTTGTATTAATCTTTGTCTCGATAGCGGGTATATTATATAAATTCCAGGATGTCCTGCTTTACTTTCCTGAGCAGCCCTCTTCATCACGCCTTTATGTTCCTATGCCTACTGGTATACCACATGAAAACATC…		ann.char
Alpha/beta hydrolase domain-containing protein 14B	ABHEB_PONAB	isogroup16351	1	isotig20740	508	TTCAGAGGCTTTGTGCCTGGGTCCAGCTGTGGTGaTCAGCCCATCGCTCAGCGGCATGTACTCACTGCCCTTCCTCTTAGAGCACAGCCAGCTGTTCAAGGGCTATGTACCTGTGGCACCCATCTGCACTGAGAAATTCACAGCGGAGCAGTATGCCCAGATCAAAACCCCCACGCTGATCGTGTACGGGGACCAGGACGTGGAGCTGGGGCAGACCAGTCTGAACAACCTGCGGCACCTCCCTGAGCACCAGGTGCTGGTGCTGCAGGGTGCAGGACACCCCTGCTACCTGGACAAGCCCAATGAGTGGCACCGTGGACTCCTGGCCTTCCTGCAGCAGCTGAAGTGAGCAGCACAGAACCACAGGGCAGGGGGATGTGGCCAGCCCACCCACCCCTC…		ann.char
Abl interactor 1	ABI1_HUMAN	isogroup00107	6	isotig01257	2417	CCTCCCctCAGAGGGGgAaGGATGGGTGGGGAAAGCGAGCGTTCACGAAAGCGAGGCGAAGAGGAATCCCACAATACCAGGCGGGTTGCGAGCCCGGtGCTGCCGCTGTCTCTTTAATGCAAGAGGAAGCGATGCGGAGGGGTGGAAAATGGCAGAGTTGCAGATGTTGCTAGAGGAGGAAATCCCTTCTGGCAAGCGGGCTTTGCTCGAGAGCTACCAGAACCTCACCCGAGTCGCCGACTACTGCGAAAACAACTACATCCAGGCTCCAGATAAAAGGAAAGCATTAGAAGAGACCAAAGCCTACACAACTCAGTCTCTAGCCAGTGTTGCTTATCAGATCAATGCACTGGCCAACAATGTGTTACAGCTGCTGGACATCCAAGCGTCCCAGCTACG…	actin polymerization or depolymerization [GO:0008154]; dendrite morphogenesis [GO:0048813]; Fc-gamma receptor signaling pathway involved in phagocytosis [GO:0038096]; lamellipodium morphogenesis [GO:0072673]; megakaryocyte development [GO:0035855]; movement of cell or subcellular component [GO:0006928]; negative regulation of cell proliferation [GO:0008285]; peptidyl-tyrosine phosphorylation [GO:…	ann.char.bf
Abl interactor 1	ABI1_HUMAN	isogroup00107	6	isotig01255	2504	CCTCCCctCAGAGGGGgAaGGATGGGTGGGGAAAGCGAGCGTTCACGAAAGCGAGGCGAAGAGGAATCCCACAATACCAGGCGGGTTGCGAGCCCGGtGCTGCCGCTGTCTCTTTAATGCAAGAGGAAGCGATGCGGAGGGGTGGAAAATGGCAGAGTTGCAGATGTTGCTAGAGGAGGAAATCCCTTCTGGCAAGCGGGCTTTGCTCGAGAGCTACCAGAACCTCACCCGAGTCGCCGACTACTGCGAAAACAACTACATCCAGGCTCCAGATAAAAGGAAAGCATTAGAAGAGACCAAAGCCTACACAACTCAGTCTCTAGCCAGTGTTGCTTATCAGATCAATGCACTGGCCAACAATGTGTTACAGCTGCTGGACATCCAAGCGTCCCAGCTACG…	actin polymerization or depolymerization [GO:0008154]; dendrite morphogenesis [GO:0048813]; Fc-gamma receptor signaling pathway involved in phagocytosis [GO:0038096]; lamellipodium morphogenesis [GO:0072673]; megakaryocyte development [GO:0035855]; movement of cell or subcellular component [GO:0006928]; negative regulation of cell proliferation [GO:0008285]; peptidyl-tyrosine phosphorylation [GO:…	ann.char.bf
Abl interactor 1	ABI1_HUMAN	isogroup00107	6	isotig01260	2218	ACCAAGTTGATGTTAGCAACAGTAGCTTCCTTTCAGTAACTTGTGGCTTCATAGTGCTTACACCAGGTCCATGTgTAGTGgCCccACGTCTCCCTAGGAATAGGATAAaGTGAcTTGATGTCCTGCATCTGAGTATGCCATCTCTCTATTTCACTGCCAGCTGCTGTCAGCATTtCtGgAAaCTAATTTAATGAACTGATTTAAAAAGTGaTTTGTACCAtAAtGCCTTTCTCTTTTtCCCTTTCCCAAAGCAACTTGTAaTtGtGCTgaTAGgAGAATCtcAGGGCAGGgATTTGGCATTTtGgATTATACATTTAATTCCTTGAGCACTTTTTCTCTAaGAGCAGCAGCTGCcTGTTGTAGTTTTCTATTTATtAATtGaTtCCTGGATGTGTGCAC…	actin polymerization or depolymerization [GO:0008154]; dendrite morphogenesis [GO:0048813]; Fc-gamma receptor signaling pathway involved in phagocytosis [GO:0038096]; lamellipodium morphogenesis [GO:0072673]; megakaryocyte development [GO:0035855]; movement of cell or subcellular component [GO:0006928]; negative regulation of cell proliferation [GO:0008285]; peptidyl-tyrosine phosphorylation [GO:…	ann.char.bf
Abl interactor 1	ABI1_RAT	isogroup00107	6	isotig01258	2342	CCTCCCctCAGAGGGGgAaGGATGGGTGGGGAAAGCGAGCGTTCACGAAAGCGAGGCGAAGAGGAATCCCACAATACCAGGCGGGTTGCGAGCCCGGtGCTGCCGCTGTCTCTTTAATGCAAGAGGAAGCGATGCGGAGGGGTGGAAAATGGCAGAGTTGCAGATGTTGCTAGAGGAGGAAATCCCTTCTGGCAAGCGGGCTTTGCTCGAGAGCTACCAGAACCTCACCCGAGTCGCCGACTACTGCGAAAACAACTACATCCAGGCTCCAGATAAAAGGAAAGCATTAGAAGAGACCAAAGCCTACACAACTCAGTCTCTAGCCAGTGTTGCTTATCAGATCAATGCACTGGCCAACAATGTGTTACAGCTGCTGGACATCCAAGCGTCCCAGCTACG…	actin polymerization or depolymerization [GO:0008154]	ann.char.bf
Abl interactor 1	ABI1_RAT	isogroup00107	6	isotig01259	2240	CCTCCCctCAGAGGGGgAaGGATGGGTGGGGAAAGCGAGCGTTCACGAAAGCGAGGCGAAGAGGAATCCCACAATACCAGGCGGGTTGCGAGCCCGGtGCTGCCGCTGTCTCTTTAATGCAAGAGGAAGCGATGCGGAGGGGTGGAAAATGGCAGAGTTGCAGATGTTGCTAGAGGAGGAAATCCCTTCTGGCAAGCGGGCTTTGCTCGAGAGCTACCAGAACCTCACCCGAGTCGCCGACTACTGCGAAAACAACTACATCCAGGCTCCAGATAAAAGGAAAGCATTAGAAGAGACCAAAGCCTACACAACTCAGTCTCTAGCCAGTGTTGCTTATCAGATCAATGCACTGGCCAACAATGTGTTACAGCTGCTGGACATCCAAGCGTCCCAGCTACG…	actin polymerization or depolymerization [GO:0008154]	ann.char.bf
Abl interactor 1	ABI1_RAT	isogroup00107	6	isotig01256	2429	CCTCCCctCAGAGGGGgAaGGATGGGTGGGGAAAGCGAGCGTTCACGAAAGCGAGGCGAAGAGGAATCCCACAATACCAGGCGGGTTGCGAGCCCGGtGCTGCCGCTGTCTCTTTAATGCAAGAGGAAGCGATGCGGAGGGGTGGAAAATGGCAGAGTTGCAGATGTTGCTAGAGGAGGAAATCCCTTCTGGCAAGCGGGCTTTGCTCGAGAGCTACCAGAACCTCACCCGAGTCGCCGACTACTGCGAAAACAACTACATCCAGGCTCCAGATAAAAGGAAAGCATTAGAAGAGACCAAAGCCTACACAACTCAGTCTCTAGCCAGTGTTGCTTATCAGATCAATGCACTGGCCAACAATGTGTTACAGCTGCTGGACATCCAAGCGTCCCAGCTACG…	actin polymerization or depolymerization [GO:0008154]	ann.char.bf
Abl interactor 2	ABI2_MOUSE	isogroup16122	1	isotig20511	535	GCGGGgcgAGggACGGACGGACGGACGGACAGAGAGACGGACGGGgAGAGGATGTGAAGATGGCGGAGCTGCAGATGCTGCTGGAGGAGGAGATCCCGGGCGGGCGCCGGGCCCTGTTCGACAGCTACACGAACCTGGAGCGGGTGGCCGAGTACTGCGAGACCAACTACATCCAGTCAGCAGATAAGCAGCGAGCCCTGGAAGAAACCAAAGCCTACACAACGCAGTCATTAGCAAGCGTAGCCTATCTGATCAACACTTTGGCCAACAATGTTCTCCAAATGCTGGATATCCAGGCATCCCAGCTTCGGCGCATGGAATCTTCAATCAACCATATTTCACAAACGGTGGACATTCACAAAGAGAAAGTTGCTAGAAGAGAAATTGGTATCTTGACTA…	actin polymerization or depolymerization [GO:0008154]; camera-type eye development [GO:0043010]; cell migration [GO:0016477]; dendrite development [GO:0016358]; learning or memory [GO:0007611]; peptidyl-tyrosine phosphorylation [GO:0018108]; positive regulation of Arp2/3 complex-mediated actin nucleation [GO:2000601]; Rac protein signal transduction [GO:0016601]	ann.char.bf
ABI gene family member 3	ABI3_HUMAN	isogroup17268	1	isotig21657	240	GGACACGGAGCTGTCGCTGGCGCCGGGCGCGCTGCTCTTCGTCACCCGCCGCTTCCCGGACGGCTGGTGCGAGGGGGgTGATGGATtCGGGAAtGGGGCCCCGCTCcGgAATCTTCCCCGGGAATTTCGTGGAGACCGTCTGAGCCCGACCCGCTCCCCGCGCCGaGGCGCTTCCTTGGAATTTCGGCTTTGGCAGCGCAGGAATGCGCAGGAaTTcCGGCTTTTGGAGCCGGGAATTTc	movement of cell or subcellular component [GO:0006928]; regulation of cell migration [GO:0030334]	ann.char.bf
Probable serine/threonine-protein kinase abkC	ABKC_DICDI	isogroup13089	1	isotig17478	786	TCGAGTGTCTtCAAACTaCTGATGACCCACAAGGTGAAGCTTGAGAGCAATTTTGCTTCCATCgTCTttGCCATCATGGTtCTGGAAGGACTGGGACGTTCACTGGACCCTGAgCTGGACATCCTGGAGGCAGCTAaGCCACTGCTCATCAAAaGTGCAGCTTCTGCCCTCAAaTAGACTCGTGTGGCTGCTGCCCTCTCGCTGTGGGGgTtACCTGTGCTGCCTGGGAGCTGACACAGAGTGAAGCTCAAGGTGAGAAGTCACATGTACCCCaGGGATGTGGTgTGCAGTGGCTGCTCTCCACTAATGCTGCCTtCAGTCATTTCAGCCAAGCACCAGGCATGGGATGGAATACCTGAATTTCCAGAAAGCAGTAAGAATTTgCACAGTTGGACATTT…		ann.char
Tyrosine-protein kinase ABL1	ABL1_HUMAN	isogroup04667	1	isotig09056	2348	GATCCCCTCTGTACCAAAGccACAGTCCTCTACAAAGCTGCTGCTGAGCACAGCAACCCCAGCTGCCTCTTCCTCATCCGTgCCCTCTGCCCCAGGCGGGgAGCAGACGTCATCCACAGCCTTCATCCCCCTCATATCCACCAGGGTGTCGCTGCGGAAGACCCGGCAGCCCCcGGAGAGGATtGCcAGTGGCACCATCACCAAAGGGGTGGTGCTGGAAAGCACCGAGGCTCTGCGGCTCGCCATCAGCAAGAACTCTGAGCAAATGGCCAGCCACAGCGCcGTCCTGGAGGCTGGCAAGAACCTCTACACCTTCTGCGTGAGCTACGTGGACTCCATCCAGCAGATGAGGAACAAGTTTGCCTTTCGGGAGGCCATCAATAAGCTGGAGAACAACCT…	actin cytoskeleton organization [GO:0030036]; actin filament branching [GO:0090135]; activated T cell proliferation [GO:0050798]; activation of protein kinase C activity [GO:1990051]; alpha-beta T cell differentiation [GO:0046632]; autophagy [GO:0006914]; B-1 B cell homeostasis [GO:0001922]; B cell proliferation involved in immune response [GO:0002322]; B cell receptor signaling pathway [GO:00508…	ann.char.bf
Actin-binding LIM protein 1	ABLM1_HUMAN	isogroup03118	1	isotig07507	3638	AGAAAACTCAAGGCATGGGGAAcAGAGGAAAaTTTCTGGCATAACCTTTGCAAAAATACATTTTtCTCTTGAACcTtCcAGGCGTCCATTCCCACCAGGAGATCGAGTtACCTTTAATGGACGGGACTGTCTCTGTCAGATGTGTGCcCAGCCCATGTCCTCCAGCCCAAGAGAACTCTCTGCCTCAAGCAATTGTGCTGGCTGTGGAAGAGACATCAAAAAtGGACAaGCACTGCTAGCCcTGGATAAGCAGTGGCACCTGGGGTGCTTTAAGTGCAAGgCCTGTGGGAAGGTCCTAACTGGGGAATACATCAGCAAAGATGGTGCTCCTTACTGTGAAAAGGAtTaCcAAGTTCTTTTTGGAGTCAAGTGTGAAGCATGTCACCAGTTCATTACTGG…	animal organ morphogenesis [GO:0009887]; cilium assembly [GO:0060271]; cytoskeleton organization [GO:0007010]; lamellipodium assembly [GO:0030032]; visual perception [GO:0007601]	ann.char.bf
Actin-binding LIM protein 2	ABLM2_HUMAN	isogroup05682	1	isotig10071	1949	AGGAGgCAAGCTGGGGGATGAAAGAATACAAGaTTTATCCTTATGAAACACTTATTGTAAcAAACCGAGTCcGTGTGAAATTGCCTAAGGaTGTGGACAGGACcAGGCTGGAGAGGCATTTGTCCCCTGAAGAGTTCCAGGAAGTCTTCAAAATGAGTATTGAGGAATTTGATCGTCTGGCACTTTGGAAGCGGAATGACCTGAAGAAAAAGGCCCTGCTTTTCTAAACCCTCCCAGATGAAATATCTGCTTAATCAAAACAAAAaTAGTCTTGCCAGAACTATCACATGCACTTGCTGTTGAACCATTGTCCAGCTTCATTGTGTTAGTATGTGTTGGGGAAACAAGACAGATTAGATGGTAATGTGTTGGGATACAGACAATTTGCTAATCTTGCAT…	actin cytoskeleton organization [GO:0030036]; transcription, DNA-templated [GO:0006351]	ann.char.bf
Actin-binding LIM protein 3	ABLM3_HUMAN	isogroup01875	2	isotig05710	894	TCGGCTCCCCAAaCCgTGTCATCTGCGCTAAAGTGGATAATGAgATCCTTAaTtACAAAGACCTGgcAGCTCTTCCCAaGATTAAAGCCAtCTATgAAGTGCAGCGTCcTGACCTCaTTTCCTaCGAGCCCTATCACAGATACACGTCGGAtGAGaCGCTGgAGAGATATaGCTATGGGGAGTCCcTGGGGACCcTCtCCCcATACTCACAGgACATCTATGAGAGCTTCGACACGCGGCAGAGACGAGCCTCCAGCCCTGGCTACATCGACTCCCCCACCTACAGCCGCCAGGGCATGTCCCCCACCATCCCcAGGTccccccACCACTTCTACCGCTCAGCTGCTGGTGAGAGTAaCATCTACAGGAAGCCCCCGATCTACAAGCGCCACGCCACCA…	actin cytoskeleton organization [GO:0030036]; cilium assembly [GO:0060271]; lamellipodium assembly [GO:0030032]; positive regulation of protein targeting to mitochondrion [GO:1903955]; positive regulation of transcription from RNA polymerase II promoter [GO:0045944]; transcription, DNA-templated [GO:0006351]	ann.char.bf
Actin-binding LIM protein 3	ABLM3_HUMAN	isogroup01875	2	isotig05709	1214	ACAAGGTGACGTTcAGCGGGAAGGACTGTGTCtGCCAGAACTGcTCCCAGTCCCTGCTCAGCACCAAGCCCATCAaGATCCACGGgCCcAGCCACTGTGCTGgCTGCAAGGAGGAGATCAAGcAGGgCCAGTCCcTGCTGGCCCTGGAGAAGCAGTGGCACGTCAGCTGCTTCAAGTGCCAAACGTGCGGgATCATCCTGACCGgCGAGTACATCAGCAAGGATGGCATCCCCTACTGTGAGTCCGACTACCACGCCCAGTTCGGCATCAAGTGCGAGACCTGTGACCGCTACATCAGCGGCCGTGTCCTGGAGGCAGGAGGGAAGCACTACCACCCCACCTGTGCCAGATGTGTGCGCTGCCACCAGATGTTCACAGAGGGAGAGGAGATGTACCTGA…	actin cytoskeleton organization [GO:0030036]; cilium assembly [GO:0060271]; lamellipodium assembly [GO:0030032]; positive regulation of protein targeting to mitochondrion [GO:1903955]; positive regulation of transcription from RNA polymerase II promoter [GO:0045944]; transcription, DNA-templated [GO:0006351]	ann.char.bf
Active breakpoint cluster region-related protein	ABR_BOVIN	isogroup12264	1	isotig16653	865	TGGCAAGGGCCTGGAGATGAGGAaGTTGGTGCTCTCGGGTTTCCTGGCCAGCGAGGAGATCTACATtAACCAGCTGGAGGCCCTCTTGTTGCccATGAAGCCACTGAAGGCCACGGCCACCACgTCGCAGCCTGTCCTCACCCTCCAGCAGATCGAGACGATTTTCTACAAGATCCAGGATATCTATGAGATCCACAAGGAGTTCTACGACAGCCTGTGCCCCAAGGTGCAGCAGTGGGACAGCAATGTCACCATGGGCCACCTCTTCCAGAAGCTGGCCAGCCAGCTGGGGGTCTACAAAGCCTTTGTGGATAATTACAAAATCGCATTGGAGACGGCAGAGAAGTGCAGCCAGAGCAACTACCAGTTCCAGAAGATCTCGGAGGAGCTGAAGGTGAA…	actin cytoskeleton organization [GO:0030036]; brain development [GO:0007420]; inner ear morphogenesis [GO:0042472]; intracellular signal transduction [GO:0035556]; negative regulation of blood vessel remodeling [GO:0060313]; negative regulation of cellular extravasation [GO:0002692]; negative regulation of inflammatory response [GO:0050728]; negative regulation of neutrophil degranulation [GO:004…	ann.char.bf
Active breakpoint cluster region-related protein	ABR_MOUSE	isogroup07444	1	isotig11833	1509	AGCCGTGccATCGAGCGcctcaagaagaaGATGTTTGAGAatGAGTTCtGGCTGCTCCTCAACTCCCCtGCCATTCCCTTCCGCATCCACAaCcGCAATGGGAAGAGCTACCTCTTCCTGCTCTCCTCCGACTACGAGCGGTCtGAGTGGaGGGaGGCCATCCAGAGACtGCAGAAGAAGGACCTCcAGGCCTTtGTGCTGAGCTCaGTGGAGCTGCAGGTGCTCACGGGATCCTGCTTCAaGCTACGCACTGTCCACAACaTCCCAGTCACCAGCAACAAGGACGATGACGAGTCCCCAGGGCTTTaTGGGTTCCTGCACGTCATCGTCCaCTCTGCCAAGGGCTTCAaGCAGTCAGCCAACCTCTaCTGCACgCTGGAAGTGgACTCCTTtGGCtAC…	actin cytoskeleton organization [GO:0030036]; brain development [GO:0007420]; inner ear morphogenesis [GO:0042472]; intracellular signal transduction [GO:0035556]; negative regulation of blood vessel remodeling [GO:0060313]; negative regulation of cell migration [GO:0030336]; negative regulation of cellular extravasation [GO:0002692]; negative regulation of inflammatory response [GO:0050728]; neg…	ann.char.bf
Actin-binding Rho-activating protein	ABRA_PIG	isogroup00290	4	isotig02111	1995	GAGCGAGGAGGCGCGCAGCAGGGCGCGCAGGAAGAGCGGCGCCGTGCACAGCCTCAAGGACCGGTGGCAGGAGTGGGCTGACCAGCACATCATAACGCAGAAGCTCAACCCCTTCAGCGACGAGTTCGACCACGAGCTGGCCATGTCCACGCGCCTGCACAAAGGAGACGAGGGATACGGCCACCCAAAGGAAGGAACCAAAACTGCGGAGAGAGCCAGGAGGGCCGAGGCCCACATCCACCGGGAGATCAGGGACTTGTGCTTCATCATCGAATCGATGGCCgAGCCGCGGCCCGACGGCAAGATCCAGGTCACCTTCGGGGAGCTCTTCGACAGATACGTCCGCATTTCAGATAAGGTGGTCGGGATTCTGATGAGAGCCAGGAAaCACGGGCTGGT…	positive regulation of Rho protein signal transduction [GO:0035025]; protein transport [GO:0015031]; regulation of transcription, DNA-templated [GO:0006355]; transcription, DNA-templated [GO:0006351]	ann.char.bf
Actin-binding Rho-activating protein	ABRA_PIG	isogroup00290	4	isotig02109	3238	GAGCGAGGAGGCGCGCAGCAGGGCGCGCAGGAAGAGCGGCGCCGTGCACAGCCTCAAGGACCGGTGGCAGGAGTGGGCTGACCAGCACATCATAACGCAGAAGCTCAACCCCTTCAGCGACGAGTTCGACCACGAGCTGGCCATGTCCACGCGCCTGCACAAAGGAGACGAGGGATACGGCCACCCAAAGGAAGGAACCAAAACTGCGGAGAGAGCCAGGAGGGCCGAGGCCCACATCCACCGGGAGATCAGGGACTTGTGCTTCATCATCGAATCGATGGCCgAGCCGCGGCCCGACGGCAAGATCCAGGTCACCTTCGGGGAGCTCTTCGACAGATACGTCCGCATTTCAGATAAGGTGGTCGGGATTCTGATGAGAGCCAGGAAaCACGGGCTGGT…	positive regulation of Rho protein signal transduction [GO:0035025]; protein transport [GO:0015031]; regulation of transcription, DNA-templated [GO:0006355]; transcription, DNA-templated [GO:0006351]	ann.char.bf
Actin-binding Rho-activating protein	ABRA_PIG	isogroup00290	4	isotig02108	3237	GAGCGAGGAGGCGCGCAGCAGGGCGCGCAGGAAGAGCGGCGCCGTGCACAGCCTCAAGGACCGGTGGCAGGAGTGGGCTGACCAGCACATCATAACGCAGAAGCTCAACCCCTTCAGCGACGAGTTCGACCACGAGCTGGCCATGTCCACGCGCCTGCACAAAGGAGACGAGGGATACGGCCACCCAAAGGAAGGAACCAAAACTGCGGAGAGAGCCAGGAGGGCCGAGGCCCACATCCACCGGGAGATCAGGGACTTGTGCTTCATCATCGAATCGATGGCCgAGCCGCGGCCCGACGGCAAGATCCAGGTCACCTTCGGGGAGCTCTTCGACAGATACGTCCGCATTTCAGATAAGGTGGTCGGGATTCTGATGAGAGCCAGGAAaCACGGGCTGGT…	positive regulation of Rho protein signal transduction [GO:0035025]; protein transport [GO:0015031]; regulation of transcription, DNA-templated [GO:0006355]; transcription, DNA-templated [GO:0006351]	ann.char.bf
Actin-binding Rho-activating protein	ABRA_PIG	isogroup00290	4	isotig02110	1994	GAGCGAGGAGGCGCGCAGCAGGGCGCGCAGGAAGAGCGGCGCCGTGCACAGCCTCAAGGACCGGTGGCAGGAGTGGGCTGACCAGCACATCATAACGCAGAAGCTCAACCCCTTCAGCGACGAGTTCGACCACGAGCTGGCCATGTCCACGCGCCTGCACAAAGGAGACGAGGGATACGGCCACCCAAAGGAAGGAACCAAAACTGCGGAGAGAGCCAGGAGGGCCGAGGCCCACATCCACCGGGAGATCAGGGACTTGTGCTTCATCATCGAATCGATGGCCgAGCCGCGGCCCGACGGCAAGATCCAGGTCACCTTCGGGGAGCTCTTCGACAGATACGTCCGCATTTCAGATAAGGTGGTCGGGATTCTGATGAGAGCCAGGAAaCACGGGCTGGT…	positive regulation of Rho protein signal transduction [GO:0035025]; protein transport [GO:0015031]; regulation of transcription, DNA-templated [GO:0006355]; transcription, DNA-templated [GO:0006351]	ann.char.bf
Actin-binding Rho-activating protein	ABRA_RAT	isogroup11620	1	isotig16009	929	ccaggataaagttCttggaaaggcgtcattGCgagaaGAGTGAGTACTGCACTGTGTGCTGCACGGAGGctGCggggtttGttccgTaaCTGcggAccggtggAGCAcCGTCTGACAGCGCACACAGGGACCACAGTTAAAGCCAGTCACGGATTCATTTCCTGCTGGAGTGCCTTAAAACATTTTCAGAAATGGAAGGAGATAAAGGGCAAGGTGCTAAAGCTACCAGTGCAGTGGGTGACCTGAGGAGAAGCTGGCAGACGTGGGCAGAGGATCACATTGAGTATCAGAGGAAGAATCCCTTCAGCAGCGACGACAGGCTTGCAGCaAAACCTGcGCATACTCACAGAGGAGACCCCACCTACGGGAGAcCCCCcGAaGGgTCCCGGACTGAGCAGA…	positive regulation of Rho protein signal transduction [GO:0035025]; positive regulation of sequence-specific DNA binding transcription factor activity [GO:0051091]; positive regulation of transcription from RNA polymerase II promoter [GO:0045944]; protein import into nucleus, translocation [GO:0000060]; transcription, DNA-templated [GO:0006351]	ann.char.bf
Costars family protein ABRACL	ABRAL_COTCO	isogroup15148	1	isotig19537	621	ACAGCGGCGGCAGCAGCGACCACAATGAATGTGGAACATGAAATTAGCCTCCTAGTTGAGGAGATTCGGCGGCTGGGAACCAAAAATGCTGATGGACAAGTGAGTGTGAAATTCGGTGTGCTGTTTGCTGATGACAAGTGTGCCAACCTCTTTGAAGCCCTGGTGGGAACACTTAAGGCGGCAAAACGACGGAAGATCATCACTTACCAAGGAGAGCTGCTTTTACAAGGTGTTCATGACAATGTGGACATCATGCTGCTGCAGAACTGATGCAGTGTTTCAACTATGCATTGGTGGAATTGTTTGAAACAGTTTGATCAATCAGACAATTGTTTGATTTGCCATACACTCTTAATAAGGTTGATCATTCCAAGGCGTTTTGATGTATTTTGTATATCT…		ann.char
Ankyrin repeat and BTB/POZ domain-containing protein 1	ABTB1_RAT	isogroup10821	1	isotig15210	1012	AGACATGTACCTGCTGCccgggcTGaagcgcctctgtggcAggaccctggCGCAGATCCTCGACGAGGACAACATCATCAACATCTGGAGGATTGCAAAGCTGTTCCAGCTGACCCGACTGGAGGACCAGTGCACAGAGTACATGGCCAAGATCATCGAGAAGCTGGTGGAGTTGGAGGAGTTTGCAGCTGCtGTGAAGGAGAACGCAGAGGCGGTGGAGGAGCGGCAGGAGACTGACTCCATCCCCTGGTCGATGACATCCGCTTCCACATCACCAGCAACGTGCAGACTTACAGTGCCATTGAGGAAGCCAaCCAGAAaCTTGAAGCTCTAGAAAaCCTCCTGGCCAGTATAGGGCTCGAGTGCTGATGTGTGCAAACCCTGCCTGCCATGTGCAGC…	proteasome-mediated ubiquitin-dependent protein catabolic process [GO:0043161]; protein ubiquitination involved in ubiquitin-dependent protein catabolic process [GO:0042787]; regulation of proteolysis [GO:0030162]	ann.char.bf
Acetyl-CoA carboxylase	ACAC_CHICK	isogroup12933	1	isotig17322	796	tGCTGGACTGGAGAACCTCCAGGACCTTCTTCTACTGGCGGCTGCGGCGGCTGCTGCTGGAGGAGGCCGTGAAGAGCAAAATCcACGGGgCCAACCCCGAGCTGACGGACGGGCAGATCCAGGCAATGCTGCGGCGCTGGTtCGTGGAGGCaGAGGGCACGGTCAAGGCCTACCTGTGGGACAGCAACAAGGACCTGGTGGAGTGGCTGGAGAAGCAGCTGACGGAGGAGGAGGGCGTGCGCTCGGTGGTGGAGGAGAACATCAAGTACATCTCCAGGGACTACGTGCTGAAGCAGATCCGGGGCCTGGTCCAGGCCAATCCCGAGGTTGCCATGGATTCCATCGTGCACATGACCCAGCACATCTCGCCCACGCAGCGAGCCGAGGTGGTGCGGATCC…	fatty acid biosynthetic process [GO:0006633]; malonyl-CoA biosynthetic process [GO:2001295]; positive regulation of gene expression [GO:0010628]; positive regulation of transcription, DNA-templated [GO:0045893]; regulation of biological quality [GO:0065008]; regulation of gene expression, epigenetic [GO:0040029]; response to carbohydrate [GO:0009743]; response to fatty acid [GO:0070542]; response…	ann.char.bf
Acetyl-CoA carboxylase 1	ACACA_HUMAN	isogroup07441	1	isotig11830	1507	GCAaGGTGAAGGGCTGGGTTGAGAGATTAATGAAGACCcTGAGGGATCCATCTTTGCCCCTGCTGGAACTGCAGGATATCATGACCAGTGTTTCTGGACGGATACCACCCAATGTAGAAAAGTCCATCAaGAAGGAGATGGCCCAGTATGCCAGCAACATCACCTCAGTCCTCTGCCAGTTTCCTAGCCAACAGATTGCCAACATCCTGGACAGCCACGCGGCCACGCTGAACCGCAAGTCGGAGCGCGAGGTTTtCTTCATGAACACCCAGAGCATCGTGCAGCTGGTGCAGAGGTACCGCAGTGGCATTCGGGGCCACATGAAGGCCGTGGTGATGGATCTGCTCCGGCAGTACCTGAAGGTGGAGACTCAGTtCcAGCACGGTCACTATGACAAGT…	acetyl-CoA metabolic process [GO:0006084]; biotin metabolic process [GO:0006768]; carnitine shuttle [GO:0006853]; cellular response to prostaglandin E stimulus [GO:0071380]; fatty acid biosynthetic process [GO:0006633]; fatty-acyl-CoA biosynthetic process [GO:0046949]; lipid homeostasis [GO:0055088]; malonyl-CoA biosynthetic process [GO:2001295]; multicellular organismal protein metabolic process…	ann.char.bf
Acetyl-CoA carboxylase 2	ACACB_HUMAN	isogroup01366	2	isotig04691	2785	tgtcagaaacctccatctttgatgtgcttcccgtgttcttctaccacaccaaacgaggtggtgcgcatggcagcgctggaggtGTacgtgcggcgagggtacaTTGCCTACGAGCTGcACAgCcTGCAGCACcAGCAGCTCtCAGaTGGCACcTGCcaTCGtGGAGTTCCAGTtCATGCtgccctcctCCCACCCCAaCAGGAtATCTGTCCCTGTCAGCATCTCcAACCCTGACCTGGCCAGGCACAGcACcGAGCTCTtCATGGACAGtGGCTTTtGCCCcACGAgCcAGAGgATGGgAGTCaTGGtGGCCTtCCGCaGATTTGAGGACTTCACAAGGAACTTCGATGAAGTGATCTtGtGCTttGCCAAATCCCCGTCAGACAACGGGCTCCTCAG…	acetyl-CoA metabolic process [GO:0006084]; biotin metabolic process [GO:0006768]; carnitine shuttle [GO:0006853]; energy homeostasis [GO:0097009]; fatty acid biosynthetic process [GO:0006633]; malonyl-CoA biosynthetic process [GO:2001295]; negative regulation of catalytic activity [GO:0043086]; negative regulation of fatty acid beta-oxidation [GO:0031999]; negative regulation of gene expression […	ann.char.bf
Acetyl-CoA carboxylase 2	ACACB_HUMAN	isogroup08435	1	isotig12824	1332	GAGATGGTGAAGGGGGAgGTGCTGAAGGCCAACAGcGAGCTCAGCCACATCCACATCCAGTCCATGCTGCGGCGCTGGTTCATGGAGACTGAGGGAGCTGAGAAGGGCTACCTCTGGGACAACAACCAGGTGGTGGTGGAGTGGCTGGAGAAGCACATGCAGGAGGAGGgCAGCACCCAGTCAGTCATCAGGGAGAACATCAAGTACCTGAAGAGGGACTACATCCTCAAGCACATCCGGAGCTTGCTCCAGGCCAACCCCGAGCTGACCATGGACTGCATCGTGCAGATGGCTCAGCACATCTCCGGGCCACAGAAGGCCCAGGTCGCTCATCTCCTGTCCAGGGTGGACACTGATGACCCcTtCCTGAGCTGGGCAATCACCACAGGGTAGGAGAAA…	acetyl-CoA metabolic process [GO:0006084]; biotin metabolic process [GO:0006768]; carnitine shuttle [GO:0006853]; energy homeostasis [GO:0097009]; fatty acid biosynthetic process [GO:0006633]; malonyl-CoA biosynthetic process [GO:2001295]; negative regulation of catalytic activity [GO:0043086]; negative regulation of fatty acid beta-oxidation [GO:0031999]; negative regulation of gene expression […	ann.char.bf
Acetyl-CoA carboxylase 2	ACACB_HUMAN	isogroup01366	2	isotig04692	1431	tgtcagaaacctccatctttgatgtgcttcccgtgttcttctaccacaccaaacgaggtggtgcgcatggcagcgctggaggtGTacgtgcggcgagggtacaTTGCCTACGAGCTGcACAgCcTGCAGCACcAGCAGCTCtCAGaTGGCACcTGCcaTCGtGGAGTTCCAGTtCATGCtgccctcctCCCACCCCAaCAGGAtATCTGTCCCTGTCAGCATCTCcAACCCTGACCTGGCCAGGCACAGcACcGAGCTCTtCATGGACAGtGGCTTTtGCCCcACGAgCcAGAGgATGGgAGTCaTGGtGGCCTtCCGCaGATTTGAGGACTTCACAAGGAACTTCGATGAAGTGATCTtGtGCTttGCCAAATCCCCGTCAGACAACGGGCTCCTCAG…	acetyl-CoA metabolic process [GO:0006084]; biotin metabolic process [GO:0006768]; carnitine shuttle [GO:0006853]; energy homeostasis [GO:0097009]; fatty acid biosynthetic process [GO:0006633]; malonyl-CoA biosynthetic process [GO:2001295]; negative regulation of catalytic activity [GO:0043086]; negative regulation of fatty acid beta-oxidation [GO:0031999]; negative regulation of gene expression […	ann.char.bf
Isobutyryl-CoA dehydrogenase, mitochondrial	ACAD8_MOUSE	isogroup12790	1	isotig17179	813	gggCTACGGCTACCTGAAGGATTACGCAGTGCAGCAGTTCATGCGAGACATCAGAGTCCACCAGATCCTGGAAGGTACaAACGAGGTCATGAGGATGATTGTGGCCAGGAATCTGCTACAGGGCTGAAGCCACGAGCCTTAAAATCCCATCTGTTACAGCTCCCCTGTTTCCCTCCTCTGCTTTCCTTGGGAGTGGAGAGGGGGATACCCCAGTGGAAATAGCCTTCCTGCCTTCTGCACAGCTGGCTGGCACAGCTGCACACCGTGCCTGGCAGAGCTGCTGTCGCCAGGCTGGCATTGTGCAGTCAGAAATCACAGCTGTGAATGCAAACCTCTGTCTCCAAATCCTGCTCCTGCCTTGCTTGCCACACGTCCTCCTTGGAAAAAGAAACACCAGAG…	lipid metabolic process [GO:0006629]; valine catabolic process [GO:0006574]	ann.char.bf
Acyl-CoA dehydrogenase family member 9, mitochondrial	ACAD9_MOUSE	isogroup06055	1	isotig10444	1828	AAGAAGTTTTtCCTtACCCAGAAATTAGCAATGAAGAACTGGCAGAGATCAATCAGTTTGTGGGACCTGTTGAAAAGTTCTTCAATGAAGAAGTGGACTCAAAGAAAATCGATCAAGATGCAAAAATCCCgCCTGAAACCTTgCAAGGACTGAAGGACCTGGGTCTCTTTGGTATGCAGATTCCAGAGGAATATGGTGGGCTGGGCCTGTCAAACACCATGTATGCGCGTCTGGGAGAAATCACATCCCTGGATGGCTCCATTGCAGTGACTCTGGCAGCTCATCAGGCCATTGGGCTGAAGGGGATCCTCATTGCTGGCACCGAGGAGCAGAAGGCCAAGTACCTGCCCCGCCTGGCCTCAGGGGAGCACATTGCTGCCTTCTGCCTCACCGAGCCTG…	mitochondrial respiratory chain complex I assembly [GO:0032981]	ann.char.bf
Long-chain specific acyl-CoA dehydrogenase, mitochondrial	ACADL_PIG	isogroup00806	2	isotig03610	1904	AGGGCTCTCTCCCGTCCCGCCcTGTCCCGTAAGATGGCGACGCGGGTGCTCCGCCTGCGCGGCCTCCTGCGAGCCGCCGGCTCCCGCTCCTTGTCCGCCCAGCCCAGTCCTCTGCAAACAGAACAGCATGGCACAAAGCGCCTGGAGCCATCTTCAGCTAAAACTTTGATTGATATAGGCACTCGGAGGATCTTCTCATCAGACCATGATATCTTCAGGGAGAGTGCCAGGAAATTCTTCCAGGAAGAAGTGCTGCCTTTTCATGCAGAATGGGAGAAGGATGGCCAGGTGAGCAGGGAGCTCTGGGAAAAGGCTGGACAGCAGGGTTTGCTGGGTGTTGCTATTGCTGAGAAGCATGGAGGCATtGGAGCGGATATTCTCTCTTCTGCCATCGTCTGG…	long-chain fatty acid catabolic process [GO:0042758]	ann.char.bf
Long-chain specific acyl-CoA dehydrogenase, mitochondrial	ACADL_PIG	isogroup00806	2	isotig03611	1895	AGGGCTCTCTCCCGTCCCGCCcTGTCCCGTAAGATGGCGACGCGGGTGCTCCGCCTGCGCGGCCTCCTGCGAGCCGCCGGCTCCCGCTCCTTGTCCGCCCAGCCCAGTCCTCTGCAAACAGAACAGCATGGCACAAAGCGCCTGGAGCCATCTTCAGCTAAAACTTTGATTGATATAGGCACTCGGAGGATCTTCTCATCAGACCATGATATCTTCAGGGAGAGTGCCAGGAAATTCTTCCAGGAAGAAGTGCTGCCTTTTCATGCAGAATGGGAGAAGGATGGCCAGGTGAGCAGGGAGCTCTGGGAAAAGGCTGGACAGCAGGGTTTGCTGGGTGTTGCTATTGCTGAGAAGCATGGAGGCATtGGAGCGGATATTCTCTCTTCTGCCATCGTCTGG…	long-chain fatty acid catabolic process [GO:0042758]	ann.char.bf
Medium-chain specific acyl-CoA dehydrogenase, mitochondrial	ACADM_BOVIN	isogroup01658	2	isotig05276	1251	AGAGAAAGCAGAGCTGCTATTTCAGTTGGTttCAGAAGGTACCTCTTATTCATGAAACACAGTCTGCTCTGTAGACTGGATCAGCATGGGGTAAGCAGCAGCAGAGAATTCACTTTGGGGATCAACACCTTGTTCTGAACCAGAACATTAATGTGAACACAGGTTATAGCATTCTTATTTTTAAAATGGTTCCTGGAAAGATTATTCCTATAAGTGAGTTTATTTTCAACAATTTGTCAAACCAAGTTCTGGCAGAACTGGGAGCTGAAACATTAAATTATGTTGCCTAAGCCCGTGCATTACATTGCAGTATGCCTGTGGAGCATACCTCTTCCTTTGGCATTAGAACTTTGTAGGTGCTTTTTTATCTATTTTTGACTTTGCTGCCAGCAAACAAAC…	cardiac muscle cell differentiation [GO:0055007]; carnitine metabolic process, CoA-linked [GO:0019254]; fatty acid beta-oxidation [GO:0006635]; fatty acid beta-oxidation using acyl-CoA dehydrogenase [GO:0033539]; glycogen biosynthetic process [GO:0005978]; liver development [GO:0001889]; medium-chain fatty acid metabolic process [GO:0051791]; post-embryonic development [GO:0009791]; regulation of…	ann.char.bf
Medium-chain specific acyl-CoA dehydrogenase, mitochondrial	ACADM_HUMAN	isogroup01658	2	isotig05275	1582	GAGCACCGCCCccGAAGCCGCTGCGGCTGCCGCGCACTCCCGCCGAGATGGCTGCGCTGAGGGCGACGCGGCAAATGCTTCAAACCATTGCAGGGCAGGGATGGAGGTCCTATTCTAGTAAACCTGCTCAAAACTTACATGTAGGCAAACCTGGAGCTGGCTTTAGCTTTGAACTTACTGATGAACAGAAAGAGTTTCAAGCTACTGCTCGTAAATTTGCTGTGGAGGAAATTATTCCTGTTGCTGCACAATATGACAAAACTGGAGAGTATCCTGTTCCACTTATAAAGCGGGCTTGGGAGCTTGGTCTTATGAATTCACACATACCAGAAAGCTGTGGTGGCCTTGGCCTTGGCAGTTTTGAAGCATGCCTTATTACAGAAGAGTTAGCTTATGGAT…	carnitine biosynthetic process [GO:0045329]; carnitine metabolic process, CoA-linked [GO:0019254]; fatty acid beta-oxidation [GO:0006635]; fatty acid beta-oxidation using acyl-CoA dehydrogenase [GO:0033539]; medium-chain fatty acid catabolic process [GO:0051793]; medium-chain fatty acid metabolic process [GO:0051791]; oxidation-reduction process [GO:0055114]; regulation of lipid metabolic process…	ann.char.bf
Short-chain specific acyl-CoA dehydrogenase, mitochondrial	ACADS_RAT	isogroup05047	1	isotig09436	2184	TCAGCGTCAACAATTCCcTGTATTTAGGGCCAATACTGAAGTTTGGCTCTGAAGAGCAGAAGCACCAgTGGATTGCTCCCTTCACCAGTGGCGAGAAAATtGGATGTTTtGCCCTCAGTGAACCAGGAAACGGCAGCGATGCGGGTGCAGCCTCCACCATGGCACGGCTGGATGGGGATGAGTGGgTTCTGAATGGCACCAAGGCCTGGATCACCAACGCCTGGGATGCCTCGGCCACCGTGGTGTTTGCTACTACAGATAAATCCCTGAAACACAAGGGCATTAGTGCATTCCTGGTTCCCATGCCAACGCCTGGGTTGTCACTGGGGAAGAAAGAAGACAAACTGGGAATCCGAGCCTCTTCCACTGCCAACCTGATATTTGAGGACTGCCGGATAC…	butyrate catabolic process [GO:0046359]; fatty acid beta-oxidation [GO:0006635]; fatty acid beta-oxidation using acyl-CoA dehydrogenase [GO:0033539]; protein homotetramerization [GO:0051289]; response to glucocorticoid [GO:0051384]; response to starvation [GO:0042594]	ann.char.bf
Very long-chain specific acyl-CoA dehydrogenase, mitochondrial	ACADV_BOVIN	isogroup15997	1	isotig20386	543	TGAAGGaCgAGAGGAGTGGGGAGAGCAAAGAGAAAaTcACAGCATTCATCGTGGAGAGGGGCTTTGGGGGGgTCACCAGCGGACCCCCCgAGAAGAAATTggggATCAAAGCCTCCAACaCCACcTCGGTTTATTTCGAttCTGTTCCTGTCCCATCCCAAAATATTTTGGGGACACCTGGGGAGGGGTTCAAGGTGGCCATGAACATCCTGAACAACGGCAGGTTCGGCATGGCGGCGGCCATGGCTGGCACCATGAGGGGgCTGCTGGCCACAGCGGTTTCCCACGCCGCCAACCGGACCCAATTTGGGgCcAAAaTtCACAAATTTGGGGCCATCCAGGAGAAGTTGGGCAGGATGgCCCTGCTGCATTACGTCACTGAGTCCATGGCCTTCATGA…	epithelial cell differentiation [GO:0030855]; fatty acid beta-oxidation using acyl-CoA dehydrogenase [GO:0033539]; negative regulation of fatty acid biosynthetic process [GO:0045717]; negative regulation of fatty acid oxidation [GO:0046322]; regulation of cholesterol metabolic process [GO:0090181]; response to cold [GO:0009409]; temperature homeostasis [GO:0001659]	ann.char.bf
Arf-GAP with coiled-coil, ANK repeat and PH domain-containing protein 2	ACAP2_CHICK	isogroup04823	1	isotig09212	2267	CTAAACtAGAATACAaTGTAGATGCAGCcAATGGCATCGTTATGgAAGGTtATTtATtCAaGCGAGCCAGCAaTGCCTTCAAGACTtGgAaCAGGCGCTGGTTCTCAATACAAAATAACCAACTTGTGTACCAGAAGAAATTTAAGGATAATCCCACAGTAGTTGTTGAAGACCTGCGGCTCTGCACgGTTAAGCACTGTGAAGACATAGAAAGACGTTTCTGTTTTGAGGTGGTTTCTCCAACAAAGAGCTGCATGCTTCAGGCTGACTCGGAAAAGCTGCGGCAGGCGTGGATTAAGGCTGTTCAGACCAGTATTGCCACAGCGTATAGAGAGAAAGGGGATGAATCTGAGAAACAGGAAAAGAAATCATCCCcTTCTACTGGGAGCCTAGAATCTG…	cellular response to nerve growth factor stimulus [GO:1990090]; protein localization to endosome [GO:0036010]	ann.char.bf
Acetyl-coenzyme A transporter 1	ACATN_HUMAN	isogroup12428	1	isotig16817	850	TGGGGCAGACGgCCGGCTaTttCcTGGGGAACGTGCTGTTCCTGGCGCTGGAGTCCGCCTCCTTCTGCAACAaGTACCTGCGCTTCGAGCCGCAGCCGCGGGGCATCGTCACCCTCGCAGATTTCCTGTTTTTcTGGGGAGCTGTCTTCCTAATTACCACTACATTGGTTGCCTTTTTGAaGAAGGAAAACCAGGAGCTGATACCAGCAAAGGAAGAAACAAAAGGCATCACTGACACaTACAGGCTGCTATTCTCAATAATCAAGATGCCAGCAGTTCTTACTTTCTGTATCTTGATCCTCACTTCAAAAGTTGGGTTTTCAGCAGCAGATGCTGTAACAGGACTCAAACTGGTGGAGGAGGGAGTCCCcAAAGAGCACCTGGCTCTGCTGGCAGTTC…	BMP signaling pathway [GO:0030509]; SMAD protein signal transduction [GO:0060395]; transmembrane transport [GO:0055085]; transport [GO:0006810]	ann.char.bf
Acyl-CoA-binding domain-containing protein 6	ACBD6_BOVIN	isogroup13221	1	isotig17610	776	GGAGGAGGATGGCGAGGAGGTGGAGgCAGCACcGGGACGGGACcGCGGGGgACGCGGGAGGgATtGCCCTGAGAAGCTGCGGCCGGCCCATCCCTGGAAGTGTTCGaGACcAGGTGAAACTTGGAACCTGTAACACCCCCAAGCCAAGCTTCTTTGaTTTTGAGGGAAAGCAGAAATGGGAGGCTTGGAAAGCCCTGGGAGATACCAGCCCTCACCAAGCTATGCAGGAGTACATTGCTGCAGTGAAAAAACTCGACCCCAGTTGGAATCCACAGACAACAGAGAAGAGGGGAAAGGAGAGCAAAACTGTGTTTGGAGGCCCAGTCGTCAGCTCATTATATCAAGAAGAAGAAATAATCAGGGAAGAAGACAAGAACATTTTTGATTACTGCAGAGAAA…		ann.char
Long-chain-fatty-acid--CoA ligase ACSBG2	ACBG2_CHICK	isogroup10435	1	isotig14824	1055	GCTGAGGGGCCGCGCGCTCCCGCCGGgCCCGGAGTGGCTGTGTTTGTAACTAAGCATCGGTGaGGGAAGGCCCgaGCTGCAgTGCTGAGCAGGGCCCGgaGGGACAGTGCTGTGTGAGTCAGAGGCGAGGATGGCACTTGCAgAACCAGTCTCCGTGGTTTATTGCAACTCAGCTCTTCAGGGGAACGGCGAGGTGCCACGGGAAGATGTGCTGCTCAACTCTTCACCCAGAACTGCTGAGCCACACAACAGTGAGCCAGGGGAAGATTCCAAGATGGAGACATCTCaggTGAAGTCACTCAGTCCCAAAGCCTCATCCCCTCCTGGCTCCAGTGTGTGGACAACACATCGAGATGGAGAGGTCAGGCTGAGGATGGAGGAACAGGGCATTGGCAGTGA…		ann.char
Long-chain-fatty-acid--CoA ligase ACSBG2	ACBG2_CHICK	isogroup04861	1	isotig09250	2248	ACCTGccccTCAGccACATCGCTGCCCAGATGTGtgaCATttgggcAGCCATGACCTTCGGAGTGCAGgtttACtttgcccAAccaGATGCACTGAAgggCAGCTTGGtggAgAccctgcaggaGTGAGGCCAACTGCTTTTCTGGGAGTTCCTCGTGTCTGGGAAAAAATGGAaGAGAAAATGAAATCTGTGGGCATGAAAGCCTCAGCATTCCGTAGGAAAGTGGCATCGTGGGCCAAGGAAGTGGGGCTGCAGACCAACCTCAAGAGGATGAGTGGGTACTCGGAGGTGCCGGTGAATTTCCGCCTGGCCAGGCAGCTGGTGTTCAGGAAGGTGCGCAAGGCCCTGGGGCTGGACCGCTGCTCCAAGTGCTACACTGGGGCTGCTCCCATCACCAG…		ann.char
Acyl-CoA-binding protein	ACBP_ANAPL	isogroup10163	1	isotig14552	1083	GCCGCAGCCCCGCTGCAGACGCGCCGCGTCCCCGCCGGAGAAGGAGCGAGGCCGTTCCCTGCGCATCCTGCAGCAGCATGACTCTTCAGGCTGACTTTGATGGTGCTGCAGAAGATGTAAAAAAaTTAAAAaCaAGACCAACTGATGAAGAACTGAAGGAACTATATGGATTCTACAAACAGGCTACTGTTGGAGATATTAATATTGAATGTCCAGGAATGCTAGATTTGAAAGGCAAAGCCAAATGGGAGGCATGGAACCTGAAAAAAGGTTTATCAAAGGAGGATGCCATGAATGCCTATATCTCTAAAGCAAGAGCAATGGTAGAAAAATATGGAATCTAGAATATTCAAAATAATTCCCACTAATAATTAACTACTCTTCAGTAGCTGATGAACT…	transport [GO:0006810]	ann.char.bf
Acyl-CoA-binding protein	ACBP_CHICK	isogroup15509	1	isotig19898	594	GGGggCGgCGgggCAGAAGCGGCGGGGCCCGGACCGAGCTGTGTTCGTCGCgATGACCGAGGCCGCGTTCCAGAAAGCTGCCGAGGAGGTGAAGCAGCTGAAGTCGCAGCCCACGGACCAGGAGATGCTGGAAATCTACAGCCACTACAAACAGGCCACGGTGGGCGACGTGAACACGGAGCGCCCTGGTATGCTGGACTTCAAAGGCAAAGCAAAGTGGGATGCCTGGAGTGCACTGAAAGGAATGTCCAAAGAAGATGCAATGAAAGCTTACATAGCAAAAGTGGAAGAACTAAAGGGCAAATATGGCATCTGAGGACTGACTAAATCAGCTACATGCACGCCTGAAACCTGCCTTATTTCTAATAATGTGGAAAACTGGTTTCTAAGAGTAACCTT…	transport [GO:0006810]	ann.char.bf
Acyl-CoA dehydrogenase family member 11	ACD11_CHICK	isogroup04701	1	isotig09090	2331	ACATAAGGTTGATAGAGAaTATCGTGTGCAGAAAGCCTTGTTTTCAGCTGGGTTTCCAGTGCCTGAGCCCCTGTTGTATtGCAGTGACGTTtCtATCATTGgAACAGAGTTTtATGtAATGCAGCATGTGCAGGGTCGCATTTTCCGGGACATCTCTCTGcctGAGGTGGGCCCAGCAGAGCGTTCTGCTCTGTACCTTGCAATGATAGAAACTCTGGCCCTGTTGCACTCCTTTGATTTACAGTCATTGGGTCTCCAAGgaTATGGTAGAGGACCAGGATACTGCAAAAGACAGGTATCAACTTGGAAAAAACAGTATGAtGCAGCTGCTCATACAGATATTCCTGCaATGAACAAGCTGGCTGAGTGGTTAGCAAACAACTTGCCACCTGATGATAA…	fatty acid beta-oxidation using acyl-CoA dehydrogenase [GO:0033539]	ann.char.bf
Short/branched chain specific acyl-CoA dehydrogenase, mitochondrial	ACDSB_BOVIN	isogroup11560	1	isotig15949	936	gggggcGGTGGTCTACGTCACGgggCGGGCGCCAAAATGGCGGCGGCGGCGGGAGCTTGGCTGAGGGGCTGCGCGAAGCTGAGAAGACACATGCCAGCACACTTGGCTCCTTGGAGGGTTTCTCCCCGTGTTTTTAGATCCTCCAAATCAGAACTCAAGCCAACTCTAGCCAGTGATGGACTTGTCTGTGCTCCaCTTCAGATGTTCACTGAAGAGGAGGCCATGCTGAAAGACATGGTGACCAAATTTGCCCAGGAACGAGTTGCACCTTTCGTGCAGAAAATGGACGAGAATGCCAAAATGGAAGATTCCATCGTACAGGGATTGTTTGAACAAGGGCTGATGAGTATTGAGCTTGGGGAAGAATATGGAGGAACTGGAGCTTCATTTTTTTCAATC…	fatty acid metabolic process [GO:0006631]	ann.char.bf
Short/branched chain specific acyl-CoA dehydrogenase, mitochondrial	ACDSB_RAT	isogroup01136	2	isotig04231	3315	CCAAGTACTTCACTGCTGAGGTTGCTACACTGACAACCAGTAAATGCATTGAATGGATGGGAGGTGTTGGATTCACCAAGAATTACCCAATAGAAAaGTACTACAGGgACTGCAAGATAGGTACAATATATGAAGGAACTTCAAATATCCAGCTGAGCACAATTGCAAAATTCTTAGCACAGGAGTACTGAAACCATAAGGACATTTTTGATACTACATGAAAATTATTTCCCTGAACACTAATTGTGAATTACCTATTTGTAATTACAGAATGCATTGGTGATACCATAAATAAGAATACATCATCACAGTGAAATCATAGGGAAAACCATGAATTCCCcATTTCAGGAGAATGAGTCATTTATGTGCAATCAAGAATTCCACATTCAAATCCAAACT…	acyl-CoA metabolic process [GO:0006637]; fatty acid beta-oxidation [GO:0006635]; fatty acid metabolic process [GO:0006631]	ann.char.bf
Angiotensin-converting enzyme	ACE_CHICK	isogroup02836	1	isotig07225	4181	cAaCACCAGCGAGGAGGGGGCCGCCCAGTTCGCCAGGAGCTACAaCGACACGGCCGAGCTCGTCTTCTTCGACAGCGTCACGGCCAGCTGGAATTACAACACCAACCTGACGGCCGAAAATGCTGCTCTGCAGGTCCAGGCATCACTGGAGGAGCAGAGCTTCACAGAGCTCTGGGGGAAGAAAGCCAAGGAACTCTATAGCAACACGTGGAAAAACTTCAGTAACCCCCAGCTGAGGAAAATCATTGGATCCATCCAGACCTTGGGACCCTCCAACCTGCCCCTGGAGGAGAGAGAGCAGTACAACACGATCCTGAGCGACATGGACAAAATCTACTCCACGGCCAAGGTGTGCCCGTCCAACAGCACCTGCTGGGATCTCGAGCCAGACCTGTCGGA…	cell proliferation [GO:0008283]; primitive erythrocyte differentiation [GO:0060319]	ann.char.bf
Angiotensin-converting enzyme 2	ACE2_PAGLA	isogroup02858	1	isotig07247	4142	CTTTCTTCTtCACAGTGGCCATGCTTGAAGGCCGATGAGGCAGAGGCCAACAGAGAAGCTTACCTGAGAAAACCTGCTTAGTTGAGAGGTTCTCATCCTGAACATGAATAAGTTGGTCCACTTCTGGCTTCTCTGCCACCTGAGCACTGTTGTGACCccTCAGGATGTCACACAAGAAGCCCAAATATTTttAGAAGAGTTTAACAGGAGGGCAGAAAATATCAGCTATGAGAACTCCATTGCCTCATGGAACTACAACACCAACATCACTGAGGAGAATGCCAAAAAAaTGAGCGAGGCGGGCGCCCGGTGGTCGGCGTTCTACGAGGAGGCGTCCGGGAACGCCAGCAGATTCCCAGCAGACAGCATCACAGACGACCTCACCAAGCTCCAGATCCA…	angiotensin maturation [GO:0002003]; receptor-mediated virion attachment to host cell [GO:0046813]	ann.char.bf
Alkaline ceramidase 1	ACER1_MOUSE	isogroup08051	1	isotig12440	1395	GTGGGGGCCCgGGTTTGCCTGGAGGGTGCACATGGCTGCTGTCCCATCCCGAGTCTTTGCCTAGGGACGGAGCGAGGGGATTTTCTGGCGGCTGCTGGCGGTGAGCTCACACCGTGGGCACTCCTCTGCAGCTAGAGCAGCAGGGCAGGTTGCAGCTCCGGCTGTGCTGGAAACCTTGGAGCTCCCAGAGCGTGTGGAAGCAGTGCTGGTCCATCCAGGGATCACAGGTGCTGACCATGCCGAGCATATTCTCCTACCAGAGTGCCGAGGTGGAtTGGTGTGAGAGCAACTTCGTGCGCTCGGCGGTGATCGCCGAGTACTACAACACCATCAGCAATGTGAGTTTCTTTGTGCTGTCCCCTGCTCTGCTGTACCTGAACCGGCAGTACTGCCAGAAGA…	cell differentiation [GO:0030154]; cellular response to calcium ion [GO:0071277]; ceramide catabolic process [GO:0046514]; keratinocyte differentiation [GO:0030216]; regulation of lipid metabolic process [GO:0019216]; response to alkaline pH [GO:0010446]; sphingolipid biosynthetic process [GO:0030148]; sphingolipid metabolic process [GO:0006665]; sphingosine biosynthetic process [GO:0046512]	ann.char.bf
Alkaline ceramidase 2	ACER2_HUMAN	isogroup13662	1	isotig18051	737	GTTTTGATGTGTGCTCTTGCTATGTGGTTCCcTAGGAGATACCTGCCCAGAGTTTTTCGAAATGACAGGAGCCGATTTAAAGCTGCTGTGGGTGTCCTGTCTGGAGTTACCACGTGCCTGGCCTTCATTAAGCCTGCCATTAACAACATCTCACTAATGACGCTGGGAGTTCCCTGCACAGCTTTGCTCATtGCTGAGTTGAAGAGGTGTGAAAACCTGCGTGTATACAAATTGGGTCTCTTTTCAGGTCTTTGGTGGATGCTAGCACTTTTCTGCTGGATCAGTGACAAAGCGTTTTGTGAGATCTGGTCCTCATTTAATTTTCCCTATTTGCACTGTGTGTGGCACATTTTGATTTGCCTTGCGGCATATCTGGGATGTGTCTGCTTTGCTTACTTC…	activation of cysteine-type endopeptidase activity involved in apoptotic process [GO:0006919]; cellular response to drug [GO:0035690]; ceramide metabolic process [GO:0006672]; negative regulation of cell adhesion mediated by integrin [GO:0033629]; negative regulation of cell-matrix adhesion [GO:0001953]; negative regulation of protein glycosylation in Golgi [GO:0090285]; positive regulation of ce…	ann.char.bf
Alkaline ceramidase 3	ACER3_HUMAN	isogroup08661	1	isotig13050	1291	CTTCTCCCTGCGCTTCCCCGTGCCCTGGCTGCGCTCTAGCCCGGAGCGGGCGCCGCGATGGCTCCGGCCGCCGACCGGGAGGGGTACTGGGGAACGCCGACCTCCACCCTGGAGTGGTGCGAGGAGAACTACGCCGTCTCCTACTACATCGCCGAGTTCTGGAACACAGTGAGTAACCTGATTTTCATTCTACCTCCAATCTATGGTGCGATTCAGACCTATAAAGATGGCCTTGAAAAACGGTATTTAGCTGCATATTTGTGTCTTACAGCTGTGGGATTGGGATCTTGGTGCTTCCACATGACCCTGAAGTATGAAATGCAGCTGTTGGATGAACTGCCAATGATATACAGTTGTTGTGTGTTTGTCTACTGCCTGTATGAATGTTTCAAGTATAAG…	ceramide metabolic process [GO:0006672]; phytosphingosine biosynthetic process [GO:0071602]; positive regulation of cell proliferation [GO:0008284]; sphingolipid biosynthetic process [GO:0030148]; sphingosine biosynthetic process [GO:0046512]	ann.char.bf
Acetylcholinesterase	ACES_CHICK	isogroup17218	1	isotig21607	275	AGGGACTGCGCGCACAGGCCTGCGCCTTCTGGACACGGTTCCTGCCCAAACTGCTCAACGTCACCGGGCCCATGGAGGAGGCCGAGCGCCAGTGGCGGTTGGAGTTTCACCGCTGGAGCTCGTACATGATGCGCTGGAAGAGCCAGTTCGAGCTCTACAGCCGCCAGGAGCGCTGCCAGCCGCTCTAGGGACCCcGAAACCcGCCTGGGgCACCCCAAAACCCGCCTGaGGCACCCCAAAATTCACCTGGGGCACCCCAAAATCCATCcaGgCAA	neurotransmitter catabolic process [GO:0042135]; retina layer formation [GO:0010842]	ann.char.bf
Acetylcholine receptor subunit alpha	ACHA_CHICK	isogroup15987	1	isotig20376	549	TGGCTGGAAGCACTGGgTGTACTATGCTTGCTGCCCTGACACCCCcTACCTGGACATCACcTACCACTTCCTCATGCAACGCCTGCCTCTCTaCTTCATTGTCAACGTCATCATCCCCTGCCTGCTCTTCTCCTTTCTAACTGGGTTAGTTTTTTACCTACCCACAGATTCAGGTGAGAAAATGACTCTCAGCATCTCTGTCCTGCTGTCTTTGACTGTGTTCCTGCTGGTCATCGTGGAGCTGATTCCCTCCACCTCCAGCGCAGTGCCTCTGATTGGCAAGTACATGCTGTTCACCATGGTGTTCGTCATCGCCTCCATCATCATCACCGTCATCGTCATCAACACGCACCACCGCTCCCCCAGCACTCACACCATGCCCCACTGGGTCaGGAAGAT…	cation transmembrane transport [GO:0098655]; neuromuscular synaptic transmission [GO:0007274]; response to nicotine [GO:0035094]; synaptic transmission, cholinergic [GO:0007271]	ann.char.bf
Neuronal acetylcholine receptor subunit alpha-3	ACHA3_CHICK	isogroup10746	1	isotig15135	1021	GGAAaTATGTTGCCaTGGTCATtGATCGTATTTTTCTATGGGTTTTCATCCTGGTATGTATTCTAGGAACAGCAGGATTGTTTTtACAACCTCTGATGGCTGGAGATGAAATGTAAAGATTAAATAAAaTGTTGTGAAATCAAATAAAACTGCCAACTAACTCTGCACCCTCCTCCCAGCACCTCATGTCTCTTCCATGTGTAGTAGAACAAGGATCTCTCTTGGCTTCAACTTTGCTTGACCAAGGCAACTTTGTTCAAAaTGTGGAAAAAAAaaTTATTTGGAACTTTTATGACAGCTAATCTCAGAGTAATACAAGCTATGCTTTACAGCTACTTCCTGCAATAACTGGAGAAGATGGAGGCAGTTAAACTTTATAGGAATTATTTAaGAAGGGgT…	behavioral response to nicotine [GO:0035095]; nervous system development [GO:0007399]; synaptic transmission involved in micturition [GO:0060084]	ann.char.bf
Neuronal acetylcholine receptor subunit alpha-5	ACHA5_CHICK	isogroup10220	1	isotig14609	1079	ATTCCTTgTaTTGGGCTTTCATTTcTAACTGTCCTTGTCTTCTATCTTCCTTCAAaTGAaGGTGAAAAAaTTtCACTCTGCACTTCAGTACTTGTATCTTTGACTGTTTTtCTCCTCGTTATTGAAGAAaTCATTCCATCATCCTCTAAAGTTATCCCGCTCATAGGAGAGTACTTGGTGTTCACAATGATATTTGTGACCTTGTCCATCGTGATCACTGTCTTTGCTATCAATATCCACCACCGCTCCTCGTCCACGCACAATGCCATGGCTCCcTGGgTCCGCAAGATATTCcTGCACAAGCTGCCCAAGCTGCTCTGCATGAGGAGCcATGTCGACAGGTACTTTGCTCAGAAGGAGGAGACAGCAAATATGAaCGGGTCAGAGTCATCCAGGAAC…	cation transmembrane transport [GO:0098655]; neuromuscular synaptic transmission [GO:0007274]; response to nicotine [GO:0035094]; synaptic transmission, cholinergic [GO:0007271]	ann.char.bf
Activated CDC42 kinase 1	ACK1_BOVIN	isogroup13612	1	isotig18001	740	CTTTGGGGAGGAAGTGCCCCAGGGTAGCCCCTCTCCAGTGGGGgAGCTGACAGCCCCcTCATTAGCCAaGCTGGCCATGGAGGCCTTCTCTTTGCTGGACAAGACCCCACCACAGAGCCCcACACGGGcTCTACCTCGGCCTCTCcACCCCACACCGGTGGTGGACTGGGATGCCcGGCCATTGCCCCCACcGCCTGCCTaTGATGATGTGGCaCAGGATGAGGACGATATTGAGGTCTGCTCTATCACCaGCCCCCcGAGCCGGCGGGGCAAGACCAACTATGGCTTTGTGGATGAGGGTGAGCGAGGACCAGCACTGGAGGATAaCCTCTTCcTGCCCCCcAAGGAGACCAAACAGCCCAGCATGACGCAGACTACcGAGCTCTtCGAGGAGCTGCA…	cell differentiation [GO:0030154]; cell migration [GO:0016477]; endocytosis [GO:0006897]; innate immune response [GO:0045087]; peptidyl-tyrosine autophosphorylation [GO:0038083]; phosphorylation [GO:0016310]; regulation of cell proliferation [GO:0042127]; transmembrane receptor protein tyrosine kinase signaling pathway [GO:0007169]	ann.char.bf
Atypical chemokine receptor 3	ACKR3_CANFA	isogroup05820	1	isotig10209	1905	ACTCGCCCGGGCAGCGCCGCTCCAGGCCCCGAGGTCATTTGAAGTCCAATCCGAGCGACCATGAGTGCACTTGACTTGACTTCCATCCTGGATTTCCTGGAGACAGCCAACTTGACGGAGATCAACTGGACGTGCAACAGCAGCGAGTGCATCACGGTGGACGCCACAACATGTTCcGGCACGCTCAACAAGAGCGCCCTGCTCTACACCCTGTCCTTCTTCTACATCTTCATCTTCGTCATAGGCCTGGTGGCCAACTCGGTGGTGGTGTGGGTCAACCTCCAGGCCAAAATGACCGGCTATGAAACCCACCTGTACATCTTCAACCTGGCCATCGCCGACCTGTGCGTGGTGATCACCCTGCCCGTGTGGGTCATCTCGCTCGTCCAGCACAACCAG…	angiogenesis [GO:0001525]; cell adhesion [GO:0007155]; chemotaxis [GO:0006935]; negative regulation of intrinsic apoptotic signaling pathway in response to DNA damage [GO:1902230]; positive regulation of ERK1 and ERK2 cascade [GO:0070374]; receptor internalization [GO:0031623]; vasculogenesis [GO:0001570]	ann.char.bf
Atypical chemokine receptor 4	ACKR4_MOUSE	isogroup11636	1	isotig16025	928	TAGACATCATCTACGTGCTGGTTACGGACTGCAGCGCCAGTAAAACCATGGATGTGGCGCTCCAGGTCACCAAGAGCATGGCTTTGTTCCACGCCTGCCTCAACCCTCTCCTCTACGCCTTTCTGGGCGCCTCTTTCAAAATGCACATCATGAAAATCGCCAAAAAgTATGGGTACTGGAGAAGACAGCAGCAGAATGGAAGAccTGAAGAAATTTCTATGAATTATGAAGACCCTACTGAAGAAACAGTCAGTTTCACTATATAGGCTTCCATTGCTCCCATCATCTTACATAACCAAGGGAATTGTTTGCTAATTCCAGAGGGTATTGTTTCTGCAGCTGTTTCCCTTCAACTCAACTTTCAGATGAATTTCTGAACCTtGcAAGGCACTAcAGAGC…	chemotaxis [GO:0006935]	ann.char.bf
Actin-like protein 6A	ACL6A_HUMAN	isogroup07562	1	isotig11951	1487	CAATGTTGGGTGTgAGCCACGTTGTCACAACAAGCGTtGGAATGtGTGATATAGATATCAGGCCGGGTCTCTATGGCAGTGTGATTGTAGCAGGAGGAAACACTTTAATACAGAGTTTCACAGACAGATTGAACAGGGAGCTGTCTCAGAAAACCCCACCGAGCATGCGCCTGAAGTTGATCGCTAACAACACCACTGTGGAGCGGAGGTTCAGCTCGTGGATCGGGGGCTCCATTTTGGCTTCTTTGGGTACTTTCCAGCAGATGTGGATTTCTAAACAAGAATATGAAGAAGGAGGGAAACAGTGTGTAGAAAGAAAATGCCCTTAGACCTCTTTACTGTGAAAACTGCTGCCTGCTCGGTGCTCCTTCTGTTTTATAGCTTTAGCATACTCAGGAA…	ATP-dependent chromatin remodeling [GO:0043044]; chromatin remodeling [GO:0006338]; DNA recombination [GO:0006310]; DNA repair [GO:0006281]; histone H2A acetylation [GO:0043968]; histone H4 acetylation [GO:0043967]; neural retina development [GO:0003407]; positive regulation of protein targeting to mitochondrion [GO:1903955]; protein deubiquitination [GO:0016579]; regulation of growth [GO:0040008…	ann.char.bf
Actin-like protein 6A	ACL6A_HUMAN	isogroup14617	1	isotig19006	662	TAGAAAGGGACAATGGCAGCACTCTGATGGAGATAGATGGTGACAAAGGCAAACAAGGCGGCCCAACTTACTACATAGACACTAATGCCCTGAGAGTTCCAAGGGAGAATATGGAAGCCATTTCACCTTTAAAAAATGGAATGATTGAAGAttGGGATAGTTTCCAGGCAATTTTGGATCACACTTACAAGATGCATATTAAATCTGAAGCCAGTTTGCATCCTGTCCTTATGTCTGAAGCACCATGGAATACCaGGGCAAAGCGTGAAAAACTGACAGAACTGATGTTTGAgCACTACAACATCCCAGCTTTCTTCTTGTGTAAAACTGCCGTTCTGACAGCTTTTGCTAATGGGAGATCTACAGGTCTCATCTTGGATAGTGGAGCAACACACACCA…	ATP-dependent chromatin remodeling [GO:0043044]; chromatin remodeling [GO:0006338]; DNA recombination [GO:0006310]; DNA repair [GO:0006281]; histone H2A acetylation [GO:0043968]; histone H4 acetylation [GO:0043967]; neural retina development [GO:0003407]; positive regulation of protein targeting to mitochondrion [GO:1903955]; protein deubiquitination [GO:0016579]; regulation of growth [GO:0040008…	ann.char.bf
ATP-citrate synthase	ACLY_MOUSE	isogroup02897	1	isotig07286	4054	GGGgCCGGAGCGGCAGCGGAGCGGGGCGGGAGCGGCCGAGCGGGGCCCAgACTAGGCAGCCATGTCAGCCAAAGCCATCTCTGAGCAGACTGGGAAGGAGTTCTTGTACAAGTACATCTGCACCTCCTCTGCCATCCAGAACCGCTTCAAGTATGCGCGGGTCACCCCGGCcACGgACtGGgCACGGCTCACCCAGgACCACCCcTGGCTCCTGAGCGAGCGTTTGGTGGTGAAGCCAGATCAGCTCATTAAGAGACGTGGGAAGCTGGGgCTGGTTGGGATTAACCTGACTCTGGATCAGGTGAAGGCTTGGCTCAAGCAGCGCCTGGGCCAGGAAACCACGATTGCTAATGCCAAGGGAATCCTGAAGAACTTTCTGATTGAGCCCTTCGTCCCTCA…	acetyl-CoA biosynthetic process [GO:0006085]; citrate metabolic process [GO:0006101]; fatty acid biosynthetic process [GO:0006633]; lipid biosynthetic process [GO:0008610]; oxaloacetate metabolic process [GO:0006107]	ann.char.bf
Muscarinic acetylcholine receptor M4	ACM4_CHICK	isogroup10291	1	isotig14680	1070	GCTACTGGCcACTGGGGGCCGTGgTGTGCGACCTGTGGCTGGCTCTGGACTATGTGGTGAGCAACGCCTCTGTCATGAACCTGCTCATCATCAGCTTTGACCGGTACTTCTGTGTCACCAAGCCCcTGACaTACCCGgCCAGGAGGACCACCAAGATGGCAGGgCTAATGATCGCGGCCGCATGGATATTGTCCTtCGTCCTCTGGgCCCCTGCCATCTTGTTCTGgCAGTTCGTtGTGGgCAaGAGgaCAGTCCCCGAGAGGGAATGCTACATCCAGTTCCTCTCCAaCCCAGCGGTGACaTTTGGCACAGCCATTGCTGCTTTCTACCTGCCCGTGGTCATCATGACGGTGCTGTACATCcACATCTCCCTGGCCAGCAGgAGCAGGGTAAGGAGGC…	adenylate cyclase-inhibiting G-protein coupled acetylcholine receptor signaling pathway [GO:0007197]; negative regulation of adenylate cyclase activity [GO:0007194]; phosphatidylinositol metabolic process [GO:0046488]; phospholipase C-activating G-protein coupled acetylcholine receptor signaling pathway [GO:0007207]; regulation of locomotion [GO:0040012]; synaptic transmission, cholinergic [GO:00…	ann.char.bf
2-amino-3-carboxymuconate-6-semialdehyde decarboxylase	ACMSD_BOVIN	isogroup07986	1	isotig12375	1406	AGGaGGGATAGCAGCACTGACACAGAAAACATTAGCACTGAAGGTGTGTTTCTCCTCTTCAGAAATGAAAATTGATATTCATAGCCACATTCTACCTAAGGAATGGCCCGACCTAAAAAAGAGATATGGATATGGTGGATGGGTACAGCTGGATCATCACTGCAAGGGACAGGCAAaGATGATGAAGGATGGAAaGGTTTTtAGAGTTATTCAAGAGAACTGCTGGgATCcAGAaGTACGGATCAAaGAGATGGACCAGTCAGGAGTCACtGTCCAAGTCCTGTCCACAGTCCCTGTAATGTTCAGCTACTGGGCCAAACCTCAGGACACGTTAGATCTCGCCCAGATATTAAaCAATGACTTAGCTGCTACAGTAAAAAAGTACCCCAAGAGGTTTGT…	negative regulation of quinolinate biosynthetic process [GO:1904985]; protein oligomerization [GO:0051259]	ann.char.bf
Protein ACN9 homolog, mitochondrial	ACN9_BOVIN	isogroup13017	1	isotig17406	794	GCCAGGGAGTTGTGGCTGATAAACTGAAGAGCATGTGGGGTTTGGGCATGAATGGCCATGGGAAATCAGGCTGCTGCTCTGACCTGGTGTTCCTGGTGGCTGCTTGCTTGTAGGATTTGAAGTCTGCCTCtGATGaaaTTTTgCttgggtgccccccatgattgggATATTAGtGtGaGAGAGAGCAGTCTAaGATGAAAGAAaGCaTGATGCACaTCTTTCCTCACTGCAGTGACTTGGCAGGCTGCTTCTGCTCCAAATGTTAATGCTTTCTTTACCTCTAAATGAAGACCATGGCACTTGGCTGTGGAAGAACCTGTGAgggtgcCAgaGCACAGTGCTGAGCTCACCTGACCAAACTtCATGTGGTACATGAATGGTTTCATGGCTCTGgTATTT…	mitochondrial respiratory chain complex II assembly [GO:0034553]; regulation of gluconeogenesis [GO:0006111]; response to oxidative stress [GO:0006979]; succinate metabolic process [GO:0006105]	ann.char.bf
Acyl-coenzyme A thioesterase 11	ACO11_MOUSE	isogroup12697	1	isotig17086	822	AGGTGCGGATGTACACGCTGGAGGAGGACAGGTTCCTGTCGTTCCGCATCGAGATGTCGGTGCGCGTCGCGGCCGGCCGAGCcTTCTCCCTGCTCTCCAACCTGCGGCGCCGCCACGAgTGGGACAGCCACTACGTGAGTGCTGAGCTCGTCCAGAAGGTCGATGAtGATGACATGATCTACCACGTGGTGAGCCAGAaGCTCAGGAaCGAGAaCAAGCCGCAGGACTtCGTtATCcTGGCGTCGCGGCGaAAGCCCTGCAGCAAGGGGGACCCCTACGTGGTGGCcTTtCGGTCGGTGACGCTGCCCACCCACCCcGCCAGAGCCGAATTCACGcGCGGCGAGACGCTCTGCTCCGGGTTCTGCATTTGGCCAGAGTCAGAGGAGATGAGCAAGGTGG…	acyl-CoA metabolic process [GO:0006637]; fatty acid metabolic process [GO:0006631]; intracellular signal transduction [GO:0035556]; response to cold [GO:0009409]; response to temperature stimulus [GO:0009266]	ann.char.bf
Acyl-coenzyme A thioesterase 12	ACO12_HUMAN	isogroup05632	1	isotig10021	1964	AGGGTtGGACAAATTATTGCcATCAGAACAAAGgTGAacAGAgCATTCAAAACTAGCAtGGAGGTTGGCATCAAGGTGACAGTACAAgATgTTTtGACTAATGCAGAAAaGATtGTGAGtGTGGCATAtGCAACATATGTGGCCAAaCCAGTTGGTGCTGGAAAGGTTGaGTTAAcACCTGTGGAGCTGCTGTCTGCAGAAGATCACCTGGAGCACAGCCTGGCTATTGAGAGGaGAAGAATCCgCCTGGgCTATGTCCAGGTCTTtcAGAAGCTAATGCAGGAGAGCAATAAGgAAGATACTTGtGAAGAGAAGGATGCAGTTTCAACTGAACATACtCACGTACAgAGCACTGAGCTtGtCCTGCCTCCTCATGCAAACCATCATGgAAACACTTtt…	acetyl-CoA metabolic process [GO:0006084]; acyl-CoA metabolic process [GO:0006637]; fatty acid metabolic process [GO:0006631]; pyruvate metabolic process [GO:0006090]	ann.char.bf
Acyl-coenzyme A thioesterase 13	ACO13_MOUSE	isogroup11549	1	isotig15938	937	GGgCGGCGGGCGGCGTTCGGCGGGGCGGCGGCATGGGGTTCACCGTGGAGAGCCTGAGGGAGGCCATGAAGTACATGCTGGAGTCGCAGGGCTTCGACCGGGTGCTCCGCAAGATGAAACTTCAATCTGCAGCTCCTGGAAAAGTTGTTTGTGAAATGAAAGTAGAGGAGGAGCATACAAACAGAGGTGGCACgTTACATGGAGGTTTGACAGCCACCCTTGTGGACGTGGTGTCAACAGCAGCCTTGCTGTACACAGAGAGAGCAATGCCTGGGGTCAGTGTGGACATGAACATCACATATACTTCTGCTGCTAAGATTGGAGAAGAGATAcTGATTACAGCTCAGATTTTGAAGCAAGGAAAAAATCTCGCATTTGCCACCGTGGATTTAACAAATA…	protein homotetramerization [GO:0051289]	ann.char.bf
Cytoplasmic aconitate hydratase	ACOC_CHICK	isogroup01109	2	isotig04178	3330	CTGCCTGCGCCCGGCGGCCCcTGACGGCGAGCGGCGATCTGTGTGCTCCtCGCTTCCCcGGgACACTAACAGTCTTCAACAACCATGAGCAACCCTTTTGTACGGATTGTGGAGCCCcTGGACCCAGAACAGCCTCTGAAGAAATTCTTTAATCTGAGCAAATTGGAAGATGTGAGATACGCTCGCCTGCCATTTTCCATTCGAGTCCTCCTGGAAGCAGCTATCCGTAACTGTGATGAATTCCTAGTGAAGAAAGGAGATGTTGAGAATATTCTCAACTGGAAAGtGATGCAACACAAGAATGTTGAAGTGCCATTTAAGCCTGCAAGAGTTATTCTGCAAGACTTCACTGGGGTGCCTGCTGTGGTTGACTTTGCTGCAATGCGTGATGCtGTGAAG…	cellular iron ion homeostasis [GO:0006879]; response to iron(II) ion [GO:0010040]; tricarboxylic acid cycle [GO:0006099]	ann.char.bf
Cytoplasmic aconitate hydratase	ACOC_CHICK	isogroup01109	2	isotig04177	3324	CTGCCTGCGCCCGGCGGCCCcTGACGGCGAGCGGCGATCTGTGTGCTCCtCGCTTCCCcGGgACACTAACAGTCTTCAACAACCATGAGCAACCCTTTTGTACGGATTGTGGAGCCCcTGGACCCAGAACAGCCTCTGAAGAAATTCTTTAATCTGAGCAAATTGGAAGATGTGAGATACGCTCGCCTGCCATTTTCCATTCGAGTCCTCCTGGAAGCAGCTATCCGTAACTGTGATGAATTCCTAGTGAAGAAAGGAGATGTTGAGAATATTCTCAACTGGAAAGtGATGCAACACAAGAATGTTGAAGTGCCATTTAAGCCTGCAAGAGTTATTCTGCAAGACTTCACTGGGGTGCCTGCTGTGGTTGACTTTGCTGCAATGCGTGATGCtGTGAAG…	cellular iron ion homeostasis [GO:0006879]; response to iron(II) ion [GO:0010040]; tricarboxylic acid cycle [GO:0006099]	ann.char.bf
Acyl-CoA desaturase	ACOD_CYPCA	isogroup02704	1	isotig07093	4675	GGACCTGCGCGCCCGCGTACCGCCGCCCAGCAGCCCAGACACGGCCCCCATGCCTGCGCACTTGCTGCAGGAGGAGGAGTTCtCCTCCACCTCCAGCACCACTGCTGTTGGCACAGTCACCTCCCGGGTGGCCAGGAATGGAAATGCCGTCGTGGAGAAGGACTTACTCAATCATGAGGACTTGGCAGGAGACCGGGGCATGGTAGATGATATCTTTGATGAGACCTACCAGGAGAAAGAGGGCCCCAAGCCCCCTCTGCGATACGTCTGGAGGAATATCATCCTCATGAGCCTGCTGCACCTAGGGGCCCTATTCGCCTTGACACTGATACCTTCTGCGAAGATCCAGACTCTGGCATGGGCTGTTCTGTGTTTCCTGGTGAGTGCTCTGGGGATCAC…	unsaturated fatty acid biosynthetic process [GO:0006636]	ann.char.bf
Aconitate hydratase, mitochondrial	ACON_MOUSE	isogroup03975	1	isotig08364	2743	GCGCGACTCCATCTTTGTCAGTGAACAAAATGGCGCCGTACTGCGTGCTGGCGGCTCGGCTGAGGCATGCCTTGAATAGTGGGGTACGACGCTACCATGTTGCTCCTGTCCTGTGCCAGCGGGCCAAGGTGGCCATGAGCCACTTTGAACCTAATGAATACATAAATTATGAAAAGCTGGAGAAGAACATCAACATTGTCCGTAAGAGGCTTGACCGCCCTCTGACCTTGTCCGAGAAGATCGTATATGGACACCTGGATGACCCAGCGAAGCAGGAGATTGAGCGCGGCAAGACCTATCTGCGCTTGCGGCCAGACCGCGTGGCCATGCAGGATGCCACGGCTCAGATGGCAATGCTTCAGTTCATCAGCAGCGGGCTGCCAAAAGTGGCTGTGCCTT…	citrate metabolic process [GO:0006101]; isocitrate metabolic process [GO:0006102]; liver development [GO:0001889]; response to isolation stress [GO:0035900]; tricarboxylic acid cycle [GO:0006099]	ann.char.bf
Acyl-coenzyme A thioesterase 1	ACOT1_HUMAN	isogroup00858	2	isotig03711	1332	CGGAGAaGACACCTTTCcAGGgATCATTGATATACATGGACTTGGAGGAGGCATTTTTGAGCCCAGAGCAAGCCTGCTGGCCAATCATGGCTTTGCCACACTGGCCCTGGCTTATTAtCAATTTGAGGATCTGCCGCAGGAACCAAAGGAACTCCACCTGGAATATTTTGAAGAGGCAGTAAACTATATGCTGCAGCACCCACAGGTAAAGGGTCCAGGGGTTGGCCTGCTCGGTTTCTCCAAAGGAggggAAGTGTCCCTTGCCATGGCTGCCTTCCTGAAGAACATCAAGGCTGTTGCTGCCCTCAATGCTCCTGTTGCTGCTACATGTATTCCTTTCTCTTACAAGAATAAAATCATCCCcACTTtGACCTTATATGAACACAAAGTCAAGGCCAC…	acyl-CoA metabolic process [GO:0006637]; long-chain fatty acid metabolic process [GO:0001676]; very long-chain fatty acid metabolic process [GO:0000038]	ann.char.bf
Acyl-coenzyme A thioesterase 1	ACOT1_HUMAN	isogroup00858	2	isotig03710	1335	CGGAGAaGACACCTTTCcAGGgATCATTGATATACATGGACTTGGAGGAGGCATTTTTGAGCCCAGAGCAAGCCTGCTGGCCAATCATGGCTTTGCCACACTGGCCCTGGCTTATTAtCAATTTGAGGATCTGCCGCAGGAACCAAAGGAACTCCACCTGGAATATTTTGAAGAGGCAGTAAACTATATGCTGCAGCACCCACAGGTAAAGGGTCCAGGGGTTGGCCTGCTCGGTTTCTCCAAAGGAggggAAGTGTCCCTTGCCATGGCTGCCTTCCTGAAGAACATCAAGGCTGTTGCTGCCCTCAATGCTCCTGTTGCTGCTACATGTATTCCTTTCTCTTACAAGAATAAAATCATCCCcACTTtGACCTTATATGAACACAAAGTCAAGGCCAC…	acyl-CoA metabolic process [GO:0006637]; long-chain fatty acid metabolic process [GO:0001676]; very long-chain fatty acid metabolic process [GO:0000038]	ann.char.bf
Acyl-coenzyme A thioesterase 9, mitochondrial	ACOT9_BOVIN	isogroup00881	2	isotig03751	1056	GCGgAGCAGATTGAGGgATATaGTGGgAGCATCTACCAACTGGAGGGATCATGTGCAAGCAATGCAAGAAAGAAAaGCTCTtCATACTTTACTGGCAAAACAGCAGGAAGATCTCCCTCcTAGGAGAATGAAGGATAGCTACTtGGAAGTTATTCTtCCTCTAGGAAGTCAGCCTGAAATAAGAGAAAaGTACCTGAATGTACACAACAGCGTAAGGTTtGGAAGGATACTTGAAGATCTTGACAGTTTAGGAGTTCTTATTTGCTACACTCACACCAAGCAGGAAATGCAGCAAAGGTCTCCTTTATCCATAGTtACAGCTCTGGTGGATAAAATCAATTTGTGCCAGAAGATTATACATCCAGATTGTGACATCAAATTCACAGGCAATGTTTCTTG…		ann.char
Acyl-coenzyme A thioesterase 9, mitochondrial	ACOT9_BOVIN	isogroup00881	2	isotig03752	972	GCGgAGCAGATTGAGGgATATaGTGGgAGCATCTACCAACTGGAGGGATCATGTGCAAGCAATGCAAGAAAGAAAaGCTCTtCATACTTTACTGGCAAAACAGCAGGAAGATCTCCCTCcTAGGAGAATGAAGGATAGCTACTtGGAAGTTATTCTtCCTCTAGGAAGTCAGCCTGAAATAAGAGAAAaGTACCTGAATGTACACAACAGCGTAAGGTTtGGAAGGATACTTGAAGATCTTGACAGTTTAGGAGATTtGTGCCAGAAGATTATACATCCAGATTGTGACATTAAATTCACAGGCAATGTTtCTTGGgTTGGGAAGACCTCCATGgAaGTGAAGATGCACATGCTTCaGCTTCATGATGGtAATTaCCACCCTGtGTTAGATGCCACcTT…		ann.char
Acid phosphatase-like protein 2	ACPL2_MOUSE	isogroup07127	1	isotig11516	1567	TCTGCACATGATGTCACcTTGTCACcTGTtCTTAGTGCCTTGGGCATTACAGAGgCcAGATTTCCCAGGTTtGCTGCcAGGTTGGTTTTtGAGCTGTGGCAGGATGGGAAGAGGCCCAAAGAACACTTTATCCGCATCcTGTACAATGGTGCTGACGTCACATTCCAGACCTCCTTTTGCAAGGATCATtACAAACGTTCCAGCAAGCCAATGTGCCCACTAGAAAAaTTTGTCAACTTTGTCAAGAGGGATATGTTCTTAATTTTTAACAGTACAAGCTACTATGATGCATGTCATAGGAGAGCACTGTAGAGAAGGGAGGAGGCAGCGTTAAtTTATGTCAGTGATCTGTTTTCTGGCAGAGGCACAGTTCAGTTTTCTTACTTCTTGTACGTTTAT…	chondroitin sulfate proteoglycan biosynthetic process [GO:0050650]; glycosaminoglycan biosynthetic process [GO:0006024]; positive regulation of heparan sulfate proteoglycan biosynthetic process [GO:0010909]	ann.char.bf
Acetyl-coenzyme A synthetase 2-like, mitochondrial	ACS2L_HUMAN	isogroup02990	1	isotig07379	3849	ATAGAGCTGAAGGCAACTGTGGATGAAGCTGTGAAGAACTGTCCAAGCATCAGACATGTGTTtGTGGCTCAGAGGACAGATAACAAAgTCcAGATGGGTGACCGTGATaTTCTtCTtGAAGAGGAGATGACCAaGGCAGATTCCaTCTGcGCTCCGgAGAGCATGgACAGTGAAGATGTGCTCTTCATGCTGTATACCTCAGGCAGCActGGGAAaCCCAAAGgAATTGTtCACACCCAGGCTGGATACCTGCTGTATGCTGCTCTCACACACAAGTATGTGTTTGACTACCAGCAAGGTGATGTTTTTGGCTGTGTGGCCGACATTGGCTGGATCACAGGACATAGCTATGTTGTGTATGGACCACTCTGCAATGGAGCCACCTCTGTCCTGTTTGAA…	acetate biosynthetic process [GO:0019413]; acetyl-CoA biosynthetic process [GO:0006085]; acetyl-CoA biosynthetic process from acetate [GO:0019427]; ethanol oxidation [GO:0006069]; propionate biosynthetic process [GO:0019542]	ann.char.bf
Acetyl-coenzyme A synthetase, cytoplasmic	ACSA_HUMAN	isogroup04940	1	isotig09329	2214	TTCtGGGGGGACATCGCTAAAGAGTTCTACTGGAAGCGTCaGCACACGGGACCCTTCCTGAAGTACAACTTCGACGTGACCAAGGGGAAGATCTTCATCGAGTGGATGAAAGgAGCGACCACcAACaTCTGCTACAaCctCCTGGACAGAAATGtCAATGAGAaGAaGCTtGGGGACAAAGTtGCTTTTtACTGGgAAGGGAATGAACcTGGGGATTCCATGAAGATCACCTACCGTGAGCTGCTGCACAAAGTCTGCCAGTTTGCCAACATCCTCCGCAGCCAAGGGGTGAAGAAAGGAGACCGAGTTTCCATCTACCTGCCAATGATCCTGGAGCTGGTCATAGCCATGCTGGCCTGTGCCAGGATTGGAGCTCTGCACTCTGTTGTGTTTGCAGGT…	acetate biosynthetic process [GO:0019413]; acetyl-CoA biosynthetic process from acetate [GO:0019427]; ethanol oxidation [GO:0006069]; lipid biosynthetic process [GO:0008610]; mitochondrion organization [GO:0007005]; propionate biosynthetic process [GO:0019542]	ann.char.bf
Acyl-CoA synthetase family member 2, mitochondrial	ACSF2_RAT	isogroup06861	1	isotig11250	1625	AGGTGGATCAAGCAGCAGCTGGACTTCTGGCCCTtGgCTTGAGGAAGGGAGACAGGCTGGGgATGTGGGGACCCAACAGATACGAGTGGGTTCTCATGCAGTTTGCAACTGCCcAGGCAGGAATCATCCTGGTATCTGTGAATCCAGCCTACCAGGCCTCTGAGCTGGAGTTTGTGCTCAGGAAGGTTGGCTGTAAGGCACTGGTGTTCCCCACTCAATTTAAAaCACAGAAATACTATGATATTCTAAAGCAGTCATGTCCTGAGATAGAAAAATCCaGTCCAGGGGGAATAAaGAGCAAAAGGCTGCCTGACTTATCCATTGTCATCATGTGTGACTCTAAGCTGCCTGGCACCTTCCACATGGATGAAGTGCTGCAGGCTGGGGACAGCAGCCACG…	fatty acid metabolic process [GO:0006631]	ann.char.bf
Acyl-CoA synthetase family member 4	ACSF4_HUMAN	isogroup01584	2	isotig05128	1468	AGTGgTTGATTtGAGCAGGGTACACTTCAGATTGGtACTCATACTGTTCCTTCATTGAAATTTAACAAATATTTACAGTGTTATTTCCACTTtATAATACAAGAGGCAACTCCTACTGACTTCAATGGAGTCTAAGTTTATACTAGATTAATTAATCCATGATGGGCCTAGGTTCACAAAAGATTAACTACTCTGTTTGTACAAACTGTAGTAAACAAGTTGCTCCTTCCAGGTATATGAAGTTCAGGCTATGTCCCCAGAAACCAAGTtAAAaGTtAGATtCAAAAAaGGACTTGGGCTAGCTTGCCTGGCACAGAAATCTTGACAGACAGACGAACACTAGTCTGGTGCAAGGAAGAGCCAGGCACAGGCGAGGACGGACTCAGAGAAAGCAAGACA…	amino acid activation for nonribosomal peptide biosynthetic process [GO:0043041]; beta-alanine metabolic process [GO:0019482]; fatty acid metabolic process [GO:0006631]	ann.char.bf
Acyl-CoA synthetase family member 4	ACSF4_HUMAN	isogroup01584	2	isotig05127	1670	AGTGgTTGATTtGAGCAGGGTACACTTCAGATTGGtACTCATACTGTTCCTTCATTGAAATTTAACAAATATTTACAGTGTTATTTCCACTTtATAATACAAGAGGCAACTCCTACTGACTTCAATGGAGTCTAAGTTTATACTAGATTAATTAATCCATGATGGGCCTAGGTTCACAAAAGATTAACTACTCTGTTTGTACAAACTGTAGTAAACAAGTTGCTCCTTCCAGGTATATGAAGTTCAGGCTATGTCCCCAGAAACCAAGTtAAAaGTtAGATtCAAAAAaGGACTTGGGCTAGCTTGCCTGGCACAGAAATCTTGACAGACAGACGAACACTAGTCTGGTGCAAGGAAGAGCCAGGCACAGGCGAGGACGGACTCAGAGAAAGCAAGACA…	amino acid activation for nonribosomal peptide biosynthetic process [GO:0043041]; beta-alanine metabolic process [GO:0019482]; fatty acid metabolic process [GO:0006631]	ann.char.bf
Long-chain-fatty-acid--CoA ligase 1	ACSL1_CAVPO	isogroup09264	1	isotig13653	1208	TAAaTAtttctattcctctctaagagtaAGCttGCAATAttCTCTGctttgtCAGccttGCttttcaATTttgccAggCaaGaaGaaTaaaTCTGTGACttgaattATATATGAGCATATGCAGATGAGGTCTGGTTAAATGGTTGGCTGTCTCTACTGGGAAAaGCTGACCTACTGTCTTCTTGTGATCTTAGGAGCTGTGAAAAATTAATGTTTGATTAGCCAGTCTTTGACTTGACTGGGACATAGAGTTTTCTTTTATTCATATCCTTCCAGATAATGTCTGTTTTAGAACAGAAATTATTTGCTTTGTGAAATATGGCTTTGGTTTCAAACCAAATTTGGTACTGTCTCCATAAGGTCATCAGAACCCTCACTAATATTCTGATCTCCCTCCTA…		ann.char
Long-chain-fatty-acid--CoA ligase 1	ACSL1_CAVPO	isogroup00099	8	isotig01199	4274	GCAAGCATTAAAAGGCATATGAAGCCAGAAATTGTGTGACTTCCATTAGGAATCCTAAGTTTTTTtACTGTGTatataTATATATATATATATATGCAGAAATGTACATATtCATGTGTGTGTTtGTACATACATGTTATAAAGATTTAGAATAGTATACAACTGAGTTCTACAGGTGCCTCTGGGCATTCAGCACTTTTTCTTCCTGGTCATTTTGGTATCAATTATGCCTCAGTGTCTGTTTTACTCCTGTCTTGCACCAGAACATACAAGCTCTGTAGCTAACAGCTCTGCTCTTGATTACACAGTTAGAAACAGGATAGGAACTTGCATTTTAAAAGAAAAAAATGAAAAGTGTGTTTGGATTGCAGTATTCACCTGCTGGTTGAGGCCTGTACA…		ann.char.bf
Long-chain-fatty-acid--CoA ligase 1	ACSL1_CAVPO	isogroup08189	1	isotig12578	1372	AGTGAGGATCCTGATTATAAGAAAAAGTAAGCCTGAGTACATGGTTCAGCTTGTAACATTCTTAGGGAtATCTGAGAATTTAAaGTTTcAGTCCTGgCAAATTtAAGCTACCAGAAATCAGTTTTCCATCTTTCTTTAGTGTGTtAGCAGCTTATTTTTTtCAGAATCTGACTAAAAAGCaTCAGGCTATTGAAGTGTTACTCTATTTAATAGGTCATGTTGGAGCACcAaTGCCGTGCAATATCATCAAACTTGTTGATGTACAAGAAATGAATTACTTGgCTGCCAAAGGAGAGGgTGAAGTAAGTAATTTCAGAAGGTCAATATGAGCCTCTTGGGAAATcTTGGaaaattttttttttgTtCCTGAAATAGTTGAGTTTAGTAAAAGTGCTAAAC…		ann.char
Long-chain-fatty-acid--CoA ligase 1	ACSL1_CAVPO	isogroup00099	8	isotig01198	4276	GCAAGCATTAAAAGGCATATGAAGCCAGAAATTGTGTGACTTCCATTAGGAATCCTAAGTTTTTTtACTGTGTatataTATATATATATATATATGCAGAAATGTACATATtCATGTGTGTGTTtGTACATACATGTTATAAAGATTTAGAATAGTATACAACTGAGTTCTACAGGTGCCTCTGGGCATTCAGCACTTTTTCTTCCTGGTCATTTTGGTATCAATTATGCCTCAGTGTCTGTTTTACTCCTGTCTTGCACCAGAACATACAAGCTCTGTAGCTAACAGCTCTGCTCTTGATTACACAGTTAGAAACAGGATAGGAACTTGCATTTTAAAAGAAAAAAATGAAAAGTGTGTTTGGATTGCAGTATTCACCTGCTGGTTGAGGCCTGTACA…		ann.char.bf
Long-chain-fatty-acid--CoA ligase 1	ACSL1_HUMAN	isogroup00099	8	isotig01201	3817	ACAGCCGTGGTCGCTGCTGCTGtTGCCGGGAGATTCCAGCATTGGAACAACTGCACTGAACTGCAATGCAAGCACATGAGTTGTTTAGATACCTACGAATGCCAGAACTTGGGGATGTCAGACAGTACGTGCGCACCCTTCCGACAAATACGCTGATGGGCTTCGGTGCTTTTGCAGCTCTCACAACCTACTGGTATGCAACAAGACCAAAAGCACTAAAACCACCATGCGACTTAGCAATGCAGTCTGTGGAAGTAGAGGGTGGTGAGCATGCTCGAAGGTCCTCTCTTCTCAAAAGCGATGAACTGTTGATGTACTACTATGATGATGTGAGAACAGTTTATGATATTTTCCAAAGGGGTTTACAAGTATCAAATAATGGTCCATGTCTAGGGTTTA…	adiponectin-activated signaling pathway [GO:0033211]; alpha-linolenic acid metabolic process [GO:0036109]; linoleic acid metabolic process [GO:0043651]; lipid biosynthetic process [GO:0008610]; long-chain fatty acid import [GO:0044539]; long-chain fatty acid metabolic process [GO:0001676]; long-chain fatty-acyl-CoA biosynthetic process [GO:0035338]; positive regulation of protein serine/threonine…	ann.char.bf
Long-chain-fatty-acid--CoA ligase 1	ACSL1_HUMAN	isogroup00099	8	isotig01200	3819	ACAGCCGTGGTCGCTGCTGCTGtTGCCGGGAGATTCCAGCATTGGAACAACTGCACTGAACTGCAATGCAAGCACATGAGTTGTTTAGATACCTACGAATGCCAGAACTTGGGGATGTCAGACAGTACGTGCGCACCCTTCCGACAAATACGCTGATGGGCTTCGGTGCTTTTGCAGCTCTCACAACCTACTGGTATGCAACAAGACCAAAAGCACTAAAACCACCATGCGACTTAGCAATGCAGTCTGTGGAAGTAGAGGGTGGTGAGCATGCTCGAAGGTCCTCTCTTCTCAAAAGCGATGAACTGTTGATGTACTACTATGATGATGTGAGAACAGTTTATGATATTTTCCAAAGGGGTTTACAAGTATCAAATAATGGTCCATGTCTAGGGTTTA…	adiponectin-activated signaling pathway [GO:0033211]; alpha-linolenic acid metabolic process [GO:0036109]; linoleic acid metabolic process [GO:0043651]; lipid biosynthetic process [GO:0008610]; long-chain fatty acid import [GO:0044539]; long-chain fatty acid metabolic process [GO:0001676]; long-chain fatty-acyl-CoA biosynthetic process [GO:0035338]; positive regulation of protein serine/threonine…	ann.char.bf
Long-chain-fatty-acid--CoA ligase 1	ACSL1_MOUSE	isogroup00099	8	isotig01205	1620	ACAGCCGTGGTCGCTGCTGCTGtTGCCGGGAGATTCCAGCATTGGAACAACTGCACTGAACTGCAATGCAAGCACATGAGTTGTTTAGATACCTACGAATGCCAGAACTTGGGGATGTCAGACAGTACGTGCGCACCCTTCCGACAAATACGCTGATGGGCTTCGGTGCTTTTGCAGCTCTCACAACCTACTGGTATGCAACAAGACCAAAAGCACTAAAACCACCATGCGACTTAGCAATGCAGTCTGTGGAAGTAGAGGGTGGTGAGCATGCTCGAAGGTCCTCTCTTCTCAAAAGCGATGAACTGTTGATGTACTACTATGATGATGTGAGAACAGTTTATGATATTTTCCAAAGGGGTTTACAAGTATCAAATAATGGTCCATGTCTAGGGTTTA…	adiponectin-activated signaling pathway [GO:0033211]; lipid biosynthetic process [GO:0008610]; long-chain fatty acid import [GO:0044539]; long-chain fatty acid metabolic process [GO:0001676]; positive regulation of protein serine/threonine kinase activity [GO:0071902]; response to drug [GO:0042493]; response to nutrient [GO:0007584]; response to oleic acid [GO:0034201]; response to organic cyclic…	ann.char.bf
Long-chain-fatty-acid--CoA ligase 1	ACSL1_MOUSE	isogroup00099	8	isotig01202	2474	GCAAGCATTAAAAGGCATATGAAGCCAGAAATTGTGTGACTTCCATTAGGAATCCTAAGTTTTTTtACTGTGTatataTATATATATATATATATGCAGAAATGTACATATtCATGTGTGTGTTtGTACATACATGTTATAAAGATTTAGAATAGTATACAACTGAGTTCTACAGGTGCCTCTGGGCATTCAGCACTTTTTCTTCCTGGTCATTTTGGTATCAATTATGCCTCAGTGTCTGTTTTACTCCTGTCTTGCACCAGAACATACAAGCTCTGTAGCTAACAGCTCTGCTCTTGATTACACAGTTAGAAACAGGATAGGAACTTGCATTTTAAAAGAAAAAAATGAAAAGTGTGTTTGGATTGCAGTATTCACCTGCTGGTTGAGGCCTGTACA…	adiponectin-activated signaling pathway [GO:0033211]; lipid biosynthetic process [GO:0008610]; long-chain fatty acid import [GO:0044539]; long-chain fatty acid metabolic process [GO:0001676]; positive regulation of protein serine/threonine kinase activity [GO:0071902]; response to drug [GO:0042493]; response to nutrient [GO:0007584]; response to oleic acid [GO:0034201]; response to organic cyclic…	ann.char.bf
Long-chain-fatty-acid--CoA ligase 1	ACSL1_MOUSE	isogroup00099	8	isotig01203	2077	GCAAGCATTAAAAGGCATATGAAGCCAGAAATTGTGTGACTTCCATTAGGAATCCTAAGTTTTTTtACTGTGTatataTATATATATATATATATGCAGAAATGTACATATtCATGTGTGTGTTtGTACATACATGTTATAAAGATTTAGAATAGTATACAACTGAGTTCTACAGGTGCCTCTGGGCATTCAGCACTTTTTCTTCCTGGTCATTTTGGTATCAATTATGCCTCAGTGTCTGTTTTACTCCTGTCTTGCACCAGAACATACAAGCTCTGTAGCTAACAGCTCTGCTCTTGATTACACAGTTAGAAACAGGATAGGAACTTGCATTTTAAAAGAAAAAAATGAAAAGTGTGTTTGGATTGCAGTATTCACCTGCTGGTTGAGGCCTGTACA…	adiponectin-activated signaling pathway [GO:0033211]; lipid biosynthetic process [GO:0008610]; long-chain fatty acid import [GO:0044539]; long-chain fatty acid metabolic process [GO:0001676]; positive regulation of protein serine/threonine kinase activity [GO:0071902]; response to drug [GO:0042493]; response to nutrient [GO:0007584]; response to oleic acid [GO:0034201]; response to organic cyclic…	ann.char.bf
Long-chain-fatty-acid--CoA ligase 1	ACSL1_MOUSE	isogroup00099	8	isotig01204	2017	ACAGCCGTGGTCGCTGCTGCTGtTGCCGGGAGATTCCAGCATTGGAACAACTGCACTGAACTGCAATGCAAGCACATGAGTTGTTTAGATACCTACGAATGCCAGAACTTGGGGATGTCAGACAGTACGTGCGCACCCTTCCGACAAATACGCTGATGGGCTTCGGTGCTTTTGCAGCTCTCACAACCTACTGGTATGCAACAAGACCAAAAGCACTAAAACCACCATGCGACTTAGCAATGCAGTCTGTGGAAGTAGAGGGTGGTGAGCATGCTCGAAGGTCCTCTCTTCTCAAAAGCGATGAACTGTTGATGTACTACTATGATGATGTGAGAACAGTTTATGATATTTTCCAAAGGGGTTTACAAGTATCAAATAATGGTCCATGTCTAGGGTTTA…	adiponectin-activated signaling pathway [GO:0033211]; lipid biosynthetic process [GO:0008610]; long-chain fatty acid import [GO:0044539]; long-chain fatty acid metabolic process [GO:0001676]; positive regulation of protein serine/threonine kinase activity [GO:0071902]; response to drug [GO:0042493]; response to nutrient [GO:0007584]; response to oleic acid [GO:0034201]; response to organic cyclic…	ann.char.bf
Long-chain-fatty-acid--CoA ligase 3	ACSL3_MOUSE	isogroup12498	1	isotig16887	843	GACTGGCCTGGTGACAGACGCGTTCAAGCTGAAGCGCAAAGAGCTCACGGCGTTCTATCAGACGGACATTGACCGAATGTACGGCAAGAGCGCCAAGTAACCCTCTCTGCACCTCCTGCTGCCATGAGCTCGGATCAAACAGAAATACTTGAATTGCCTGTCTCGACTCAACACTTGAGATCAACACACAAAACCACCATTCCTCATTTCCAGCTTAAACTGTTCTTTCTAATGAAGTCACCGTGATGACTGGCAAGTTTAGTAAAAGGTCATGGCAGCAAACTTGTGTCTGTCTCCTTTTTTCCAGTTTTCTCTGCTACCTTGTCAGTCTGTGGATTTTCCCGGGTCTTTTTGGGAAACCATGATTCTGAAGCCTCAAGTTTTTAAACATTtATAAAT…	brain development [GO:0007420]; fatty acid biosynthetic process [GO:0006633]; long-chain fatty acid import [GO:0044539]; positive regulation of Golgi to plasma membrane protein transport [GO:0042998]; positive regulation of phosphatidylcholine biosynthetic process [GO:2001247]; positive regulation of secretion [GO:0051047]; response to nutrient [GO:0007584]; response to organic cyclic compound [G…	ann.char.bf
Long-chain-fatty-acid--CoA ligase 4	ACSL4_RAT	isogroup02535	1	isotig06924	5871	AGCAAGCCGGTACCACCgCCGGTAGCGCTGTAATCTCCGCCAGCaGCGCCGGggCTGGGCACGTtCTACTATAGATCTAATCAACCTGAAAAAaCCTCAGTCATCACTGAGATCCCTTAAgAAAaaGGCTATGGCAAAGCGGTTAAAAGCTAAACCCATCTCGGACAAGCCAGGGAGCCCTTACCGCTCTGTCACTCACCTGAATGCACTAGCAAACATAAACATCCCTGGAGCAGACACGCTGGACAAGCTCTTTGACCATGCTTTAGCAAAGTTTGGGAAGAAGGACTGTCTTGGAACCAGGGAAATTCTGAGTGAAGAAAATGAAATGCAACCAAATGGAAAAGTATTCAAAAAGTTAaTTTTAGGAACTtACAGATGGTTATCCTATGAAGAAGT…	dendritic spine development [GO:0060996]; embryonic process involved in female pregnancy [GO:0060136]; fatty acid metabolic process [GO:0006631]; fatty acid transport [GO:0015908]; response to interleukin-15 [GO:0070672]; response to nutrient [GO:0007584]; triglyceride metabolic process [GO:0006641]	ann.char.bf
Long-chain-fatty-acid--CoA ligase 5	ACSL5_HUMAN	isogroup01171	2	isotig04301	2912	ggggCTTAGTCCTGCCGCGGGAGCTGGGGAAGCACCTCTGGAGCTGGGGAAGAACCAGCCCTAGAACACCCCTTGGGAGTTGTAAAGCAGCAAAGGAAGCAAGCTGTACCAGCCCCTCCACCCTCCTCCAGCACTGAAGGAAGGTTCAACTCTGGCTCCACTGATCCAGCACAATGATCTGGATACTTCAAGTATTGTTCTCACCGCTCCCAACACCAGCATTGATCAGTCTCATTGCATTTGGAGCTGTCATCTTCCTGTGGGTGATAAGCAGGCCAAAACCCCTTTTACCTCCTGTTGACTTGAACAAGCAGTCAATAGGAATTGAGGGAGGAGCCAGAAGAGGTGCACTCTTGACAGATAATAATCTGCTTTCTTATTACTTTGAAGATGCTAAAA…	long-chain fatty acid metabolic process [GO:0001676]; long-chain fatty-acyl-CoA biosynthetic process [GO:0035338]; regulation of extrinsic apoptotic signaling pathway [GO:2001236]	ann.char.bf
Long-chain-fatty-acid--CoA ligase 5	ACSL5_HUMAN	isogroup01171	2	isotig04302	2896	ggggCTTAGTCCTGCCGCGGGAGCTGGGGAAGCACCTCTGGAGCTGGGGAAGAACCAGCCCTAGAACACCCCTTGGGAGTTGTAAAGCAGCAAAGGAAGCAAGCTGTACCAGCCCCTCCACCCTCCTCCAGCACTGAAGGAAGGTTCAACTCTGGCTCCACTGATCCAGCACAATGATCTGGATACTTCAAGTATTGTTCTCACCGCTCCCAACACCAGCATTGATCAGTCTCATTGCATTTGGAGCTGTCATCTTCCTGTGGGTGATAAGCAGGCCAAAACCCCTTTTACCTCCTGTTGACTTGAACAAGCAGTCAATAGGAATTGAGGGAGGAGCCAGAAGAGGTGCACTCTTGACAGATAATAATCTGCTTTCTTATTACTTTGAAGATGCTAAAA…	long-chain fatty acid metabolic process [GO:0001676]; long-chain fatty-acyl-CoA biosynthetic process [GO:0035338]; regulation of extrinsic apoptotic signaling pathway [GO:2001236]	ann.char.bf
Long-chain-fatty-acid--CoA ligase 5	ACSL5_HUMAN	isogroup13347	1	isotig17736	764	TTGAGTTTtGAATGAGAAACATATCCAAAAACATGGCAATTtCTCAAGGCTTTGGACTCCTTAAAAAGTTGTAACAACTTCATCACAAATTGATTACTTAACTGTTGCCAGCTTTTCTTGACAGTGTTTTCTTTAATTGATACACAAAGAAATGTATTAaTATCAAAGAATGCTATCACATTATTTTTGCCACTGTTATTTTAAGGGTCTAAATTTCACTGTTGAATCTTGATGTCCTTCTTCCTTAGGAAACCCTAAAGGAGCTATGATCACTCATCAAAACATAGTCAGCAATGCTTCAGCTTTTGTGAAAAGTACAGAGgTAACTGAAAAAATAAACATTGTTGAAGGGAAACAATCGAATGAGTAAAACAAACATTGAAATCTCTAGCTTTGGTC…	long-chain fatty acid metabolic process [GO:0001676]; long-chain fatty-acyl-CoA biosynthetic process [GO:0035338]; regulation of extrinsic apoptotic signaling pathway [GO:2001236]	ann.char.bf
Long-chain-fatty-acid--CoA ligase 6	ACSL6_HUMAN	isogroup09519	1	isotig13908	1167	TGaCATTtCCACGGTCATTtGTGACAAGCCTGAAAAAGCCAGgaTACTCCTtGACCACGTGgAGAGGAGAGAAAcTCCAGGCCTGAGATCTATCATCCTGATGGACCCATTTGAGAAGGAATTGACAGAGaGAGGGAAACGCtGTGGGgTTtgCATCcAGgCCATgCAGGAGGTGGAGGaCTGTGgCCGTGAGAGTCGACATGTGCCTGTGCCTCCTcGaCCAGAAGATCTTTcAATTGTCTGTTTtACTAGTGGCACTACAGgAAATCCCAAAGGtGCtATGCTGaCCCATGGAAaCGTGGTGGCGgATTTTtCAGgCTTTTtGAaaGTGACGGAGAAAGTGATCTTTCcGAGACAGGACGATGTGCTCATCTCCTTCCTGCCTCTGGCTCACATGTT…	acyl-CoA metabolic process [GO:0006637]; long-chain fatty acid metabolic process [GO:0001676]; long-chain fatty-acyl-CoA biosynthetic process [GO:0035338]	ann.char.bf
Long-chain-fatty-acid--CoA ligase 6	ACSL6_HUMAN	isogroup07841	1	isotig12230	1425	TGAAGTTATGCCAGGTTGGGCAAAGAAAAGAGGATTTGAAGGAaCATATGCAcAACTCTGTAAAAATAAGGAACTGCAGCAAGCGATAATGGAAGACATGGTACGATTAGGGAAGGAGAGTGGGCTTCACTCCTTTGAGCAGGTCAAAGCCATTTATATTCACTCTGAAATGTTCTCAGTGCAAAACGGTTTGTTGACACCAACATTAAAGGCTAAGAGACCAGAACTCAGAGATTACTTCAAAAAaCAAATAGAAGAGCTATATTCAAGCATCTCCATCTGAAATCACTGGAAGAATCTTCTGAGTAATGGACTTCATAGCAATATTAGAATAATACTCAAAAAGTACAGAGCCAGAACGACACTGCTGAAATGGATAAGCATCTGAATCTTACATTT…	acyl-CoA metabolic process [GO:0006637]; long-chain fatty acid metabolic process [GO:0001676]; long-chain fatty-acyl-CoA biosynthetic process [GO:0035338]	ann.char.bf
Acyl-coenzyme A synthetase ACSM4, mitochondrial	ACSM4_HUMAN	isogroup01814	2	isotig05587	1186	TGTGTCTTTGTACACCATATGCCACAGTTTAAATCAGAAGTTATTGCAGAGACTCTCTCGAGATACCCcATCACCACCTTCTGCACGGCTCCCACCGCCTTCCGCATGCTGGTGCAACATGATGTCAGCAGCTACAAGTTCCCAAGTCTGAAACATTGTGTAACTGGAGGGGAAGCACTCAATCCTGAAGTGTTGGCGAAGTGGAAAAcCCAGACAGGGCTGGTTATCCATGAAGGTTATGGCCAGACaGAAACAGTGACAaTCTGTGCCAATATGAAAGGAACGAAAATTAAACCTGGCTCTTTGGGAAGAGCTGTTCCCCCTTACGATGTGCAGATCGTGGATGAGCACGGGGCTGTTGTGCCTGCAGGAGCAGAGGGCACCATTGCTGTGCGAGTG…	acyl-CoA metabolic process [GO:0006637]; fatty acid biosynthetic process [GO:0006633]	ann.char.bf
Acyl-coenzyme A synthetase ACSM4, mitochondrial	ACSM4_HUMAN	isogroup01814	2	isotig05588	1134	TGTGTCTTTGTACACCATATGCCACAGTTTAAATCAGAAGTTATTGCAGAGACTCTCTCGAGATACCCcATCACCACCTTCTGCACGGCTCCCACCGCCTTCCGCATGCTGGTGCAACATGATGTCAGCAGCTACAAGTTCCCAAGTCTGAAACATTGTGTAACTGGAGGGGAAGCACTCAATCCTGAAGTGTTGGCGAAGTGGAAAAcCCAGACAGGGCTGGTTATCCATGAAGGTTATGGCCAGACaGAAACAGTGACAaTCTGTGCCAATATGAAAGGAACGAAAATTAAACCTGGCTCTTTGGGAAGAGCTGTTCCCCCTTACGATGTGCAGATCGTGGATGAGCACGGGGCTGTTGTGCCTGCAGGAGCAGAGGGCACCATTGCTGTGCGAGTG…	acyl-CoA metabolic process [GO:0006637]; fatty acid biosynthetic process [GO:0006633]	ann.char.bf
Acyl-coenzyme A synthetase ACSM4, mitochondrial	ACSM4_MOUSE	isogroup12248	1	isotig16637	867	AGTGGTTGTTtCAGTGGCACGAAGGACAGAGCAGGCTTGACAACAGGTGACTGATTCCTTCGGTGCACACCTGATTCTTTTCCCTCACTGTCTGATAAAACATCATTTATCATGAGAACATTTATTAAATCCTGGATTCCTCAGTGTTTGTGGATTCTCAGGTCACCTTCCAGATCATTCCATGGAAACAACAGGCTTCTTACATCTCAGATTATTtCCTATTATGAATCTATAAACCAGTGTAAAAAGGAACTGCCAGAATATTTCAACTTTGCAAGTGATGTCTTAGATGAGTGGGCACGACTGGAAAAGGATGGAAGAAAACCAGCAAATCCAGCTTTTTGGTGGGTCAATGAGGAGGGAGAGGAGGTGAAGTGGAGCTTTGAGGAGCTGGGCTCT…	acyl-CoA metabolic process [GO:0006637]; fatty acid biosynthetic process [GO:0006633]	ann.char.bf
Acyl-CoA synthetase short-chain family member 3, mitochondrial	ACSS3_MOUSE	isogroup06839	1	isotig11228	1636	CAGCTGTATATGGCCTCAAACCTGGTGAGGTATGGTGGGCAGCTTCTGATTTAGGCTGGGTTGTTGGTCAttccTACATTTGCTAtggACCTCTCCTTCATGGTAATACTACAGTTCTGTATGAGGGgAAGCCTGTGGGAACGCCAGATGCTGGTGCCTATTTCCGTGTGCTAGCAGAGCATGAAGTAGCTGCCTTCTTTACTTCACCAACTGCAATTAGAGCAATCCGTCAGCAGGACCCTGAGGCAGCCCTGGGAAAGCAGTACTCACTGAAAAGGTTGAGAACGATGTTTGTaGCTGGTGAGCACTGTGATGTGGACACGCTAGAATGGTCAAAAAGAGTCTTCAAGGTGCCTGTCTTGGACCACTGGTGGCAAACTGAATCTGgTTCTGCAATTA…	metabolic process [GO:0008152]	ann.char.bf
Actin, cytoplasmic type 5	ACT5_CHICK	isogroup14403	1	isotig18792	679	CGTGCGCGACATCAAGGAGAAGCTGTGCTACGTGGCGCTGGACTTCGAGCAGGAGATGGCCACGGCCGCCTCCTCCTCCTCGCTGGAGAAGAGCTACGAGCTGCCCGACGGGCAGGTCATCACCATCGGCAACGAGCGCTTCCGCTGCCCCGAGTCCATCTTCCAGCCCTCCTTCCTGGGCATGGAGTCCTGCGGCATCCACGAGACCACCTTCAACTCCATCATGAAGTGCGACGTGGACATCCGCAAGGACCTGTACGCCAACACCGTGCTGTCCGGGGGCACCACCATGTACCCGGGCATCGCCGACCGCATGCAGAAGGAGATCACGGCGCTGGCGCCCAGCACCATGAAGATCAAGATCATCGCCCCGCCCGAGCGCAAGTACTCGGTGTGGAT…		ann.char
Actin, aortic smooth muscle	ACTA_MOUSE	isogroup04474	1	isotig08863	2442	GAGtgTCCCACCCTAGAGCAGCCATCCCCAGCCAAGCACTGTCAGGGGCTGTTTTGTGCCTGGAAGACAGACACTGCAGTAGAAGATGTGTGAGGAAGAGGACAGCACTGCCCTTGTCTGTGACAATGGCTCAGGGCTGTGTAAGGCTGGCTTTGCTGGAGACGATGCTCCCAGGGCAGTGTTCCCGTCCATCGTGGGCCGTCCCAGGCACCAGGGTGTGATGGTTGGTATGGGTCAAAAGgACAGCTATGTGGGTGATGAGGCTCAAAGCAAGAGAGGAATCCTGACCCTGAAATACCCCATAGAGCACGGCATCATCACAAACTGGGACGACATGGAGAAGATCTGGCATCATTCTTTCTATAATGAGCTCCGTGTTGCACCTGAAGAGCACCCGAC…	glomerular mesangial cell development [GO:0072144]; mesenchyme migration [GO:0090131]; positive regulation of gene expression [GO:0010628]; regulation of blood pressure [GO:0008217]; response to virus [GO:0009615]; vascular smooth muscle contraction [GO:0014829]	ann.char.bf
Actin, cytoplasmic 1	ACTB_SHEEP	isogroup01654	2	isotig05267	1781	CCTCGCGCCCGCCCCGGCTCCGACCGCGCCAACTCCCCAAAGCCAGCcATGGATGACGATATTGCCGCGCTCGTTGTTGACAATGGTTCCGGTATGTGCAAGGCCGGTTTCGCCGGGGATGATGCCCCCCGTGCTGTCTTCCCATCCATCGTGGGTCGCCCCAGACATCAGGGTGTGATGGTTGGTATGGGTCAGAAAGACAGCTATGTTGGTGATGAAGCCCAGAGCAAAAGAGGTATCCTGACCCTGAAGTACCCCATTGAACACGGTATTGTCACCAACTGGGATGACATGGAGAAGATCTGGCATCACACTTTCTACAATGAGCTGAGAGTAGCCCCTGAGGAGCACCCTGTGCTGCTCACAGAGGCTCCCCTGAACCCCAAAGCCAACAGAGAG…		ann.char
Actin, cytoplasmic 2	ACTG_RAT	isogroup01547	2	isotig05053	2006	AGCGGCACCGTCACCGCAGCGCccACAGAAGCGACCCCcGcGCAGCAGTCTCCGCCATGGAAGAGGAAATCGCCGCTCTCGTCATCGACAATGGCTCCGGCATGTGCAAGGCCGGGTTCGCCGGGGACGACGCTCCCCGCGCCGTGTTCCCCTCgATCGTcGGGCGcCCCCGGCACCAGGGTGTCATGGTGGGCATGGGGCAGAAGGACAGCTACGTGGGGGACGAGGCGCAGAGCAAGAGGGGCATCCTGACCCTCAAGTACCCGATCGAGCACGGCATCGTCACCAACTGGGATGACATGGAGAAGATCTGGCACCACACCTTCTACAACGAGCTGCGGGTGGCCCCCGAGGAGCACCCGGTGCTGCTCACAGAGGCTCCCCTGAACCCCAAGGCCA…	adherens junction organization [GO:0034332]; platelet aggregation [GO:0070527]; response to calcium ion [GO:0051592]; response to mechanical stimulus [GO:0009612]; retina homeostasis [GO:0001895]; sarcomere organization [GO:0045214]	ann.char.bf
Actin, gamma-enteric smooth muscle	ACTH_HUMAN	isogroup01547	2	isotig05054	1272	AGCGGCACCGTCACCGCAGCGCccACAGAAGCGACCCCcGcGCAGCAGTCTCCGCCATGGAAGAGGAAATCGCCGCTCTCGTCATCGACAATGGCTCCGGCATGTGCAAGGCCGGGTTCGCCGGGGACGACGCTCCCCGCGCCGTGTTCCCCTCgATCGTcGGGCGcCCCCGGCACCAGGGTGTCATGGTGGGCATGGGGCAGAAGGACAGCTACGTGGGCGACGAGGCGCAGAGCAAGAGGGGCATCCTCACGCTCAAGTACCCCATCGAGCACGGCATCATCACCAACTGGGAtGACATGGAGAAGATCTGGCACCACTCCTTCTACAACGAGCTGCGTGTGGCCCCCGAGGAGCACCCGACCCTGCTCACCGAGGCACCCCTCAACCCCAAGGCCA…	mesenchyme migration [GO:0090131]; muscle contraction [GO:0006936]; positive regulation of gene expression [GO:0010628]	ann.char.bf
Alpha-actinin-1	ACTN1_CHICK	isogroup00782	2	isotig03563	2373	GAGAAGTGCCAACTTGAGATCAATTtCAACACCTTGCAGACCAAGCTGCGGCTCAGCAACAGGCcAGCCTTCATGCCCTCCGAGGGgAAAATGGTCTCGGATATAAACAATGCCTGGGGTGGCCTAGAGCAGgCTGAGAAGGGCTACGAGGAGTGGTTATTGAATGAGATCCGGAGGCTGGAGAGGCTGGATCACCTGGCaGAGAAGTTCCGGCAGAAGGCATCCATTCATGAGTCCTGGACAGATGGTAAGGAgGCAATGCTGCAGCAGAAGGATTACGAAACTGCAACCCTCTCGGAGATCAAGGCCCTGCTGAAGAAACACGAGGCCTTTGAGAGTGACCTGGCTGCACACCAGGACCGCGTGGAGCAGATTGCTGCTATTGCACAAGAGCTCAAT…	actin crosslink formation [GO:0051764]; actin filament bundle assembly [GO:0051017]; sarcomere organization [GO:0045214]; skeletal muscle fiber development [GO:0048741]	ann.char.bf
Alpha-actinin-1	ACTN1_CHICK	isogroup10412	1	isotig14801	1057	CGGgCAGAGCGGGCAGCGGCACCGGCGGGACGCCACGGAACGGAACGGAGCAGGACGGGACGGACAGCAGCGGCCGCAGCCATGGATCACTACGACCCGCAGCAGACCAACGACTACATGCAGCCGGAGGAGGACTGGGACCGGGACCTGCTCCTCGACCCAGCGTGGGAGAAGCAGCAGAGGAAGACATTTACAGCATGGTGTAATTCTCACCTCCGCAAGGCTGGGACACAGATTGAGAACATAGAGGAAGATTTCAGGGATGGTCTTAAACTCATGTTACTTCTGGAAGTCATTTCAGGTGAACGTCTGGCTAAGCCTGAAAGAGGGAAAATGCGAGTGCACAAAATATCCAATGTGAACAAGGCCTTGGATTTCATTGCCAGCAAAGGAGTCAAG…	actin crosslink formation [GO:0051764]; actin filament bundle assembly [GO:0051017]; sarcomere organization [GO:0045214]; skeletal muscle fiber development [GO:0048741]	ann.char.bf
Alpha-actinin-1	ACTN1_CHICK	isogroup14279	1	isotig18668	688	CTGTCTTTCTATCTGCATGTCGTTCCTCCTGCTCCTGTCTCCTCACCcACTGCATGGTGCACCTGTTTGTTGTCCTTTCACCTCCCTTTGATCTCTGTGTCTCCCTTCCTCGTGCCCACACGTCACcGCACTGGCACTGCATGTCCTGCTGCCTGGCACACCGCATAACCAGGaCCACTCcGGCACACTTGGCCCTGAGGaGTTCAAaGCCTGTCTCATCAGCTTGGGTTACGATATTGGAAACGATGCACAGGTACTGAAAGCTAGTGGTaAACACAGCCAGATATTAAACTGGGAAAAAATAACAGTTTTTttCCTTTCTTTTCTTGTTTGTCTTAATCCATCTGTTGTTTTTCTTGTGTTTGACTATATATACATCACTTTTCTGTACTACTTACT…	actin crosslink formation [GO:0051764]; actin filament bundle assembly [GO:0051017]; sarcomere organization [GO:0045214]; skeletal muscle fiber development [GO:0048741]	ann.char.bf
Alpha-actinin-1	ACTN1_CHICK	isogroup00782	2	isotig03564	2358	GAGAAGTGCCAACTTGAGATCAATTtCAACACCTTGCAGACCAAGCTGCGGCTCAGCAACAGGCcAGCCTTCATGCCCTCCGAGGGgAAAATGGTCTCGGATATAAACAATGCCTGGGGTGGCCTAGAGCAGgCTGAGAAGGGCTACGAGGAGTGGTTATTGAATGAGATCCGGAGGCTGGAGAGGCTGGATCACCTGGCaGAGAAGTTCCGGCAGAAGGCATCCATTCATGAGTCCTGGACAGATGGTAAGGAgGCAATGCTGCAGCAGAAGGATTACGAAACTGCAACCCTCTCGGAGATCAAGGCCCTGCTGAAGAAACACGAGGCCTTTGAGAGTGACCTGGCTGCACACCAGGACCGCGTGGAGCAGATTGCTGCTATTGCACAAGAGCTCAAT…	actin crosslink formation [GO:0051764]; actin filament bundle assembly [GO:0051017]; sarcomere organization [GO:0045214]; skeletal muscle fiber development [GO:0048741]	ann.char.bf
Alpha-actinin-2	ACTN2_CHICK	isogroup01298	2	isotig04555	4081	GGGCTCCTCCGCAGGGTCAGCCACAGGGACCGGCAGCAGACAGGGACACAGCAGGGAAGGTCATCACAGGTCAGCACCTATCTGGCAGTTTCAGCCTCTGCTCTCAGCAAGATTAGTCAATATTCATTCCCTGTCACCTTGGAAAAAGAGAAAAAAAAAAAaaTGGACACTGCTACCTACAACCTCTCAGCAAGTGAACTAAACTTAAATCGTAGTAGAAGCCACAGCAGCTGAAGCTGACCCCcAGGTAGCATGAACAGCATGAATCAGATAGATACAAACATGCAGTACACCTACAACTACGAAGAGGATGAGTACATGACCCAAGAAGAAGAATGGGACAGGGACCTGCTCCTGGACCCAGCATGGGAGAAACAGCAAAGGAAGACGTTTACAGCC…	actin filament uncapping [GO:0051695]; cardiac muscle cell development [GO:0055013]; establishment of protein localization to plasma membrane [GO:0090002]; focal adhesion assembly [GO:0048041]; microspike assembly [GO:0030035]; muscle contraction [GO:0006936]; negative regulation of potassium ion transmembrane transporter activity [GO:1901017]; negative regulation of protein localization to cell …	ann.char.bf
Alpha-actinin-2	ACTN2_CHICK	isogroup01298	2	isotig04556	542	GGGCTCCTCCGCAGGGTCAGCCACAGGGACCGGCAGCAGACAGGGACACAGCAGGGAAGGTCATCACAGGTCAGCACCTATCTGGCAGTTTCAGCCTCTGCTCTCAGCAAGATTAGTCAATATTCATTCCCTGTCACCTTGGAAAAAGAGAAAAAAAAAAAaaTGGACACTGCTACCTACAACCTCTCAGCAAGTGAACTAAACTTAAATCGTAGTAGAAGCCACAGCAGCTGAAGCTGACCCCcAGGTAGCATGAACAGCATGAATCAGATAGATACAAACATGCAGTACACCTACAACTACGAAGAGGATGAGTACATGACCCAAGAAGAAGAATGGGACAGGGACCTGCTCCTGGACCCAGCATGGGAGAAACAGCAAAGGAAGGTCTGgAAATAC…	actin filament uncapping [GO:0051695]; cardiac muscle cell development [GO:0055013]; establishment of protein localization to plasma membrane [GO:0090002]; focal adhesion assembly [GO:0048041]; microspike assembly [GO:0030035]; muscle contraction [GO:0006936]; negative regulation of potassium ion transmembrane transporter activity [GO:1901017]; negative regulation of protein localization to cell …	ann.char.bf
Alpha-actinin-4	ACTN4_BOVIN	isogroup02216	2	isotig06391	651	GTGCCcGGCGCGCTGGACTACAAATCCTTCTCCACCGCGCTCTACGGCGAGAGCGACCTCTGAGCCCGCCCTCTGCGCAGCCCTGCTGGGAACCTCGGGGTGCCGTCCCCTCCCTCCCTCCCCTCGGGCCCCGCAAATGTATTTTTGGTAACGCCACACGCAGAGAAATTCCCGTTGTTTTCCACGGGGTCGGCGGCGCGGCAGCCCGAGGGTTCCTTTTCTCTGCACACACACACAGACACACACCCCACTGTGGTAATTTATGGCTTTTTCCAGATTGTGGGAGGAAAAAAAaTTTATAGGTTTTTTTtGGGGTTTTTTtGAGGGTTTTTTTtAGGGTTTTTTTTTttCGCTCACATTCCCGCCTCAGAGCAAGCGTTTCGTGGACCaaaaaataTA…	actin filament bundle assembly [GO:0051017]; bicellular tight junction assembly [GO:0070830]; negative regulation of cellular component movement [GO:0051271]; negative regulation of substrate adhesion-dependent cell spreading [GO:1900025]; peroxisome proliferator activated receptor signaling pathway [GO:0035357]; positive regulation of cell migration [GO:0030335]; positive regulation of NIK/NF-ka…	ann.char.bf
Alpha-actinin-4	ACTN4_BOVIN	isogroup02216	2	isotig06392	609	GTGCCcGGCGCGCTGGACTACAAATCCTTCTCCACCGCGCTCTACGGCGAGAGCGACCTCTGAGCCCGCCCTCTGCGCAGCCCTGCTGGGAACCTCGGGGTGCCGTCCCCTCCCTCCCTCCCCTCGGGCCCCGCAAATGTATTTTTGGTAACGCCACACGCAGAGAAATTCCCGTTGTTTTCCACGGGGTCGGCGGCGCGGCAGCCCGAGGGTTCCTTTTCTCTGCACACACACACAGACACACACCCCACTGTGGTAATTTATGGCTTTTTCCAGATTGTGGGGGgAAAAAAAAATTTaTAGGTTTTTTTTGGGGTTTTTTtGAGGGTTTTTTTtAGGgTTTTTTTTTTtCGCtCACATTCCCgCCTCAGAGCAAGCGTTTCGTGGACCAAAAAAATG…	actin filament bundle assembly [GO:0051017]; bicellular tight junction assembly [GO:0070830]; negative regulation of cellular component movement [GO:0051271]; negative regulation of substrate adhesion-dependent cell spreading [GO:1900025]; peroxisome proliferator activated receptor signaling pathway [GO:0035357]; positive regulation of cell migration [GO:0030335]; positive regulation of NIK/NF-ka…	ann.char.bf
Alpha-actinin-4	ACTN4_CHICK	isogroup08658	1	isotig13047	1296	GGAGTGCGgggTCGGGGGGggggCCCGCGATTcTGGGTCCGTGTCGCTGGCGCGTCCTCCGCCtGTCGCGACATCAGGGCGGCGATAATGGTGGATTACCACAGCGcGGGGCAGCCTCACCCgTACGGCGGGAACGGGCCGGGCCCCAATGGCGACTACATGGCCCAGGAGGACGATTGGGATCGGGATCTGCTctTGGACCCCGCCTGGGAGAAACAGCAaCGCAAGACCTTCACGGCCTGGTGCAACTCTCACCTGCGCAAGGCGGGCACGCAGATCGAGAACATCGACGAGGATTTCCGcGACGGGCTCAAGCTGATGCTGCTGCTCGAGGTCATCTCAGGCGAGCGGCTGCCGAAGCCGGAGCGGGGCAAGATGAGGGTGCACAAGATCAACAAC…	peroxisome proliferator activated receptor signaling pathway [GO:0035357]; protein transport [GO:0015031]; regulation of nucleic acid-templated transcription [GO:1903506]; retinoic acid receptor signaling pathway [GO:0048384]	ann.char.bf
Alpha-actinin-4	ACTN4_RAT	isogroup15608	1	isotig19997	581	GGAGGATCAGCTGAACCACCTGAAGGAGTACGAGGAGAACATCGTGGAGTACAAACCCAACCTGGAGCTGCTGGAGCAGCAGCACCAGCTGGTGCAGGAGGCACTCATCTTCGACAACCAGCACTCCAACTACACCATGGAGCACCTGCGCGTGGGCTGGGAGCAGCTGCTGACGACCATCGCCCGCACCATCAACGAGGTGGAGAACCAGATCCTGACCCGCGACGCCAAGGGCATCAGCCAGGAGCAGATGCAGGAGTTCAGGGCCTCCTTCAACCACTTCGACAAGGACCACGGCGGTGCCCTGGGCCCGGAGGAGTTCAAGGCCTGTTTGATCAGCCTGGGCTACGACGTGGAGAACGACCGGCAGGGTGACGCAGAATTCCAGCGGATCATGGC…	actin filament bundle assembly [GO:0051017]; bicellular tight junction assembly [GO:0070830]; negative regulation of cellular component movement [GO:0051271]; negative regulation of substrate adhesion-dependent cell spreading [GO:1900025]; peroxisome proliferator activated receptor signaling pathway [GO:0035357]; positive regulation of cell migration [GO:0030335]; positive regulation of NIK/NF-ka…	ann.char.bf
Actin, alpha skeletal muscle	ACTS_PONAB	isogroup07627	1	isotig12016	1473	GACGAGTGACCCGGCGAGGAGCGGGAGCCTCTGTCTCTGCCCGAGCAGCCCAGACACAGCCGAGACCATGTGTGACGAGGACGAGACCACCGCGCTCGTGTGCGACAACGGCTCCGGCCTGGTGAAGGCTGGCTTCGCCGGGGACGATGCCCCcAGGGCCGTGTTCCCCTCCATCGTTGGCCGCCCCcGCCATCAGGgCGTCATGGTGGGTATGGGTCAGAAGGACTCCTACGTAGGAGATGAAGCCCAGAGCAAGAGAGGTATCCTGACCCTGAAGTACCCCATTGAACACGGCATCATCACAAACTGGGACGACATGGAGAAGATCTGGCACCACACCTTCTACAACGAGCTGCGTGTGGCCCCAGAGGAGCACCCCACTCTGCTCACTGAGGCCCC…	mesenchyme migration [GO:0090131]; positive regulation of gene expression [GO:0010628]; skeletal muscle fiber development [GO:0048741]; skeletal muscle thin filament assembly [GO:0030240]	ann.char.bf
Alpha-centractin	ACTZ_MOUSE	isogroup03414	1	isotig07803	3208	GCCGAGGGCTGGGCTGTTGCTCCCTCACGGGCGGCTGCGGCGGGTCCTCGCCATGGAGTCCTACGATGTGATAGCGAACCAGCCCGTCGTGATAGACAACGGCTCGGGTGTGATTAAAGCAGGTTTTGCAGGCGATCAAATACCAAAATACTGCTTTCCTAACTATGTGGGCAGACCAAAGCAcGTTCGTGTTATGGCTGGTGCTTTAGAAGGGGACATTTTCATTGGTCCAAAGGCAGAGGAACACAGAGGTCTTCTTGCAATCCGATACCCGATGGAGCATGGCATCGTGAAGGACTGGAACGACATGGAGCGCATCTGGCAGTACGTGTATTCTAAAGACCAGCTCCAGACATTCTCAGAAGAGCATCCTGTGCTGCTGACAGAAGCACCCCTAAA…	spermatogenesis [GO:0007283]	ann.char.bf
Activin receptor type-1B	ACV1B_RAT	isogroup06075	1	isotig10464	1818	AGAGGaTCTGCGGAACACTCACtGCTGCTACTCCGATTTCTGCAACAAAaTTGATTTAATGgTTCCcAGCGGACACcTGAAAGACAAcGAGCCCCCATCcAGCTGGGGTCcTGTGGagCTGGTGGCAGTgATtGCTGGGCCTGtGTTCCTTGTGTTTGTTGTGATGATCATTGTGGtGTTtGTGTtCcATCACCACCAACGAGTCTATCACAACCGCCAGCGCCTGGACATGGAGGACCCTTCTTGTgAAATGTGCCTTTCCAAGGAcAAGACCTTGCAaGATCTGGTCTATGATCTCTCCACCTCTGGCTCTGGCTCAGGTTtGCCTCTGTTTGTGCAGCGGACCGTGGCTCGGACCATTGTCCTGCAGGAGATCATTGGCAAGGGTCGCTTTGGGGA…	central nervous system development [GO:0007417]; development of primary female sexual characteristics [GO:0046545]; extrinsic apoptotic signaling pathway [GO:0097191]; G1/S transition of mitotic cell cycle [GO:0000082]; hair follicle development [GO:0001942]; in utero embryonic development [GO:0001701]; negative regulation of cell growth [GO:0030308]; negative regulation of gene expression [GO:00…	ann.char.bf
Aminoacylase-1	ACY1_PIG	isogroup08766	1	isotig13155	1278	GGGCGGGCAGCGCCGGCGGCGGCAGCGCGGAGCTCTTTCCCCAGAGCTTTGCAGCCCTGCTCCCAGGCATGGCACCTGGGAAGCCTGGGAAGAGCGCGGGGGCCTCAGAGAACCCCTCAGTtACACTTTTCCGGGAGTACCTGAGGATTGACACTGTCCACCCTAAACCTGACTATGATGCGGCTGTCCAGTTTCTGGAGCGTGTCGGCACCGACCTGGGCTTGGCCTGCCAAAAAGTGGAGGTGTGCCAGGGCCGTGTGGTGCTGATCCTGACCTGGCAGGGCACGAACCCCCGCCTGCGCTCCATCCTTCTCAACTCTCACACCGACGTTGTGCCTGTCTTCGAGGAGCACTGGACCTACCCACCCTTCGAGGCAGTTAAAGACTCGCAAGGCAACA…	cellular amino acid metabolic process [GO:0006520]	ann.char.bf
Aspartoacylase	ACY2_PIG	isogroup08235	1	isotig12624	1365	TTGCTAGAGCTGATGTTTTGGACAAAATGAGgAAGATTGTCAAACATGGCCTTGATTTtGTGCAACTTTTtAATGAAGGCAAGGAaTTTGCACCATGCACAATCGAGGTTTTTAAAATAATGGAGAAAGtAGATtATCCcAGAAATAAGAaTGGTGAAATTATTGCAATAATTCATCCTCAACTACAGGATCAAGACTGGCAGCCACTGAAGAATGgTGATCCTGTATTTTtGACTCTTGATGGAGAAGTAATtCCATATCAGGGgAACTGTACAGTCTATCCAACATTTATTAATGAAGCaGCATATTATGAAAAGAAACAAGCTTTTGTAAAAaCAGAGAAAATCAAACTCACTGCAAAACACCTCAGCTTGCCaGTCTCaGAGCAGAGCACTTCTT…	metabolic process [GO:0008152]	ann.char.bf
Acylphosphatase-2	ACYP2_CHICK	isogroup11119	1	isotig15508	978	GCTGTCCGCGGAGCACCGGCGGCCGCCGCAGCCGCTCTTCCTCCGCTGCTGCCATGTCCGGCCTGGCCAAAGCCTCCGGCGCGCTCAAATCCGTGGATTACGAAGTGTTCGGGCGGGTGCAAGGTGTTTGTTTCAGGATGTACACAGAACAGGAAGCCAAGAAATTAGGAGTGGTTGGCTGGGTTAAAAACACCAGCCAAGGAACTGTGACtGGCCAAGTTCAGGGCCCAGAAGAGAGAGTGAATGAAATGAAATCCTGGCTGAGCAAAGTTGGAAGCCCAAGTTCCCGCATCGATAAAACGAGCTTTTCCAACGagAaGGAGATTGCCAAGCTTGACTTCTCGGATTTCAACACTAGATACTAACAGGAGGGCACCTCCCTGGGCACAAAACTGACAT…		ann.char
Adenosine deaminase	ADA_CHICK	isogroup04009	1	isotig08398	2721	GGTGGCGGCACAGCGGCGGCAaCAGCGGCGGCAACAGCGGCATGGAGCGGGCACAGAGGATCTTCGGGGGACCCAAGGTAGAGCTTCAcGTCCACCTGGATGGAGCCATCAGACCAGAGACCATCTTGTACTTTGGCAAGCAAAGAGGCATCCCTCTCCCTGGGGATACTGTTGAGGAGCTCTTAAAGTACGTCAGCTATGACACACCACTGACACTTCCCAAGTTTCTGGAGAAATTTAATTACTACATGCCTGCCATCGCGGGTGACCGTGAGGCAGTGAAGAGAATTGCCTACGAGTTCGTGGAAACCAAAGCAAAGGAAGGAGTTGCCTACGTGGAAGTCCGGTACAGCCCTCACCTCCTGGCCAACTCTGGTGTGGCTCCCATCCCCTGGGGGC…	adenosine catabolic process [GO:0006154]; hypoxanthine salvage [GO:0043103]; inosine biosynthetic process [GO:0046103]; negative regulation of adenosine receptor signaling pathway [GO:0060169]; nucleotide metabolic process [GO:0009117]; purine ribonucleoside monophosphate biosynthetic process [GO:0009168]; T cell activation [GO:0042110]	ann.char.bf
Disintegrin and metalloproteinase domain-containing protein 10	ADA10_BOVIN	isogroup02743	1	isotig07132	4510	AaTCCTCTAAatAAATATATTAGACaCTATGAAGGACTGTCCTATGAtGTGGATTtgTTACACcAAAAAaCACCagCGTGCCAAAAGAGCaGTATCACATGAAGAGCAGTTCTTGCGCCTAGATTTTCATGCTCATGGAAGACAATTCAACCTTCGAAtGAAGAGAGATACATCtCTTTTTAGTGATGACTTTAAAGTAGAAATATCGAACcAAGTAATtGATTATGATACCTCCcATATTTACACTGGACACATTtATGGTGAGCAGGGAAGTTTTACTCATGGGTCTGTTATTGATGGAAAATTtGAAGGATTCATCCAAACTCACAGTGGGACCTTTtATATTGAACCAGCAGAGAGATACATAAAGGACAGAAACCTACCATTCCACTCTGTCAT…	constitutive protein ectodomain proteolysis [GO:0051089]; in utero embryonic development [GO:0001701]; membrane protein ectodomain proteolysis [GO:0006509]; monocyte activation [GO:0042117]; negative regulation of cell adhesion [GO:0007162]; Notch signaling pathway [GO:0007219]; PMA-inducible membrane protein ectodomain proteolysis [GO:0051088]; positive regulation of cell growth [GO:0030307]; po…	ann.char.bf
Disintegrin and metalloproteinase domain-containing protein 17	ADA17_HUMAN	isogroup06289	1	isotig10678	1768	gCCcAAGCAGGAGCACCAGAGgATGGACACCATCcAGgAGGACCCCAGCACCGACTCGCACATCGAtGAGGACACCTTTGACAAGGACCCTTTCCCGAACAGCAGCTCGGCCGCCAAATCTTTCGAGGACTTGACAGAGCATCCTGTCATTAGGAGTGAGAAAGCTTCATCCTTCAAACTGCAGCGCCAGAACCGCGTGGACAGCAAAGAAACAGAGTGCTAGTGTCCTGCTGCCTGCTAAATGTGTGACTCGTGGCGGCAAAACAAGGATCTGAAACCATTTCATTTCTAGAAATATAAATGTATGTATATATATTTTTGTGAGGGAGTGGGAGAATAAGGAAGTGACCTACTGCAGATGCTGGTCATGTGTATGACCTTCCTTAAACTACATTTATG…	B cell differentiation [GO:0030183]; cell adhesion [GO:0007155]; cell adhesion mediated by integrin [GO:0033627]; cell motility [GO:0048870]; defense response to Gram-positive bacterium [GO:0050830]; epidermal growth factor-activated receptor transactivation by G-protein coupled receptor signaling pathway [GO:0035625]; epidermal growth factor receptor signaling pathway [GO:0007173]; germinal cent…	ann.char.bf
Disintegrin and metalloproteinase domain-containing protein 17	ADA17_HUMAN	isogroup06362	1	isotig10751	1746	AaGAGGGCCCTCCAGCCTGAGACACACGTAGAGAGGCTCTTAAGTTTTtCAGCCCTGCAAAGGCACTTtAAaTTGTACTTAACTGCAACTGCTGAACACTTTtCAGAAAAaTTtCAAGCATTAATTGTGGATGGTGAAGGCAAGGAAAAGGAGTATCATGTTCAATGGCAAGACTTTTTCACCGGACATGTCGTTGGAGAGCATAATTCCAAGGTTGTGGCACATATTGGGGATGAAGATTTTACAGTGCGAATCAATACTGATGGAGAAGAATACAATATCGAGCCACTGTGGAGATTTGTAGATGATGTGGAAGACGAAAGACTGCTGGTCTACAGATCTGAAGATATCAAAGATTTCTCAAGGTTGCAGTCCCCcAAAGTATGTGGTTATTTGAAG…	B cell differentiation [GO:0030183]; cell adhesion [GO:0007155]; cell adhesion mediated by integrin [GO:0033627]; cell motility [GO:0048870]; defense response to Gram-positive bacterium [GO:0050830]; epidermal growth factor-activated receptor transactivation by G-protein coupled receptor signaling pathway [GO:0035625]; epidermal growth factor receptor signaling pathway [GO:0007173]; germinal cent…	ann.char.bf
Disintegrin and metalloproteinase domain-containing protein 22	ADA22_HUMAN	isogroup07200	1	isotig11589	1560	GGCGCGGGCACAGTCTACCCACATTGCTCGAGCCAGCTTCCAGGTTGATGCTTTTGGATCATCTTTCATCTTAGATGTGACACTAAACCATGACCTGCTGTCTTCTGAATATCTTGAGAGGCATATCGAGCAAGGTGGGAAGACAGTGGAAGTTAAAGGAGGAGAACATTGCTATTATCAGGGAAAAATTCGAGGAAATCCTGTATCATTTGTTGCCTTGTCCACATGCCATGGATTACATGGGATGTTCTATGATGGAAATCATACTTACCTTATTGAACCAGATGAAAACTACACATCAGATGATGACTTcCATTTCCACTCTGTTTACAAATCCAAGTTGTTTGAATTTCCTTCAGCTGACCTGACGTCTGAGTTCTGGCAGATGAATACTACATC…	adult locomotory behavior [GO:0008344]; cell adhesion [GO:0007155]; central nervous system development [GO:0007417]; myelination in peripheral nervous system [GO:0022011]; negative regulation of cell adhesion [GO:0007162]	ann.char.bf
Disintegrin and metalloproteinase domain-containing protein 22	ADA22_HUMAN	isogroup01000	2	isotig03960	4601	TGGTGTGCCTGGACCATCGCTGCCTCCCGGCCGAGGCCTTCAACTTCAGCACcTGCCCcGGCACCGCCGACAGCCGCGTCTGCTCGGGCCACGGCGTTtGCAGCAATGAAATAAAGTGTGTCTGTGACCGATTCTGGGGAGGAGATGACTGCAGTTCTCACATCAAAGATGATCTGTTTTTTGATAAAGATGCCATCAATAAAGGTGTGGTTAGCACAAATATAATAATAGGGGCTATTGCTGGCACCATTTTAGTGTTGGCTCTTGTTTTAGGAATAACTGGTTGGGGTTACAAAAACTACAGAAGACAGAGACAAATACCCCAGGGAGATTATGTAAAAAAGCCGGGAGAGGCCGACTCTTTTTATAGCGACATGCCTCCTGGAGTCAGCACAAACT…	adult locomotory behavior [GO:0008344]; cell adhesion [GO:0007155]; central nervous system development [GO:0007417]; myelination in peripheral nervous system [GO:0022011]; negative regulation of cell adhesion [GO:0007162]	ann.char.bf
Disintegrin and metalloproteinase domain-containing protein 22	ADA22_XENLA	isogroup01000	2	isotig03959	4688	TGGTGTGCCTGGACCATCGCTGCCTCCCGGCCGAGGCCTTCAACTTCAGCACcTGCCCcGGCACCGCCGACAGCCGCGTCTGCTCGGGCCACGGCGTTtGCAGCAATGAAATAAAGTGTGTCTGTGACCGATTCTGGGGAGGAGATGACTGCAGTTCTCACATCAAAGATGATCTGTTTTTTGATAAAGATGCCATCAATAAAGGTGTGGTTAGCACAAATATAATAATAGGGGCTATTGCTGGCACCATTTTAGTGTTGGCTCTTGTTTTAGGAATAACTGGTTGGGGTTACAAAAACTACAGAAGACAGAGACAAATACCCCAGGGAGATTATGTAAAAAAGCCGGGAGAGGCCGACTCTTTTTATAGCGACATGCCTCCTGGAGTCAGCACAAACT…		ann.char.bf
Disintegrin and metalloproteinase domain-containing protein 23	ADA23_HUMAN	isogroup00728	2	isotig03456	3689	AAGGGGGgAGAGCATTGTTACTACCATGGAAaTATCAGAGGTGTGAAGGATTCCAAAGTTGCTCTTTCAACTTGTAATGGACTTCATGGCATGTTTGAAGATAGTACTTATTTGTACTTGATAGAACCGATGGATCTGACCCACACAGCAGAAAGTAAAAGTAGGCCACATATCATCCAAAGAACTTACGGAACACAAGCCTCCAAGCAGTCACAGGACTTTGAGACTGACTCTAGTTCTGAATGGCCCTTTCTGTCTGAACTGCAGTGGCTGAGGAGAAGGAGAAGAAAGAGAGCATTATCTCGTGGTGTCTTTGAAGAAATGAAATATCTGGAGCTCATGATAGTCAATGACCATAAAATGTTCAAAAGGCACCGTTCTTCAACTGCATACACAAAC…	cell adhesion [GO:0007155]; central nervous system development [GO:0007417]	ann.char.bf
Disintegrin and metalloproteinase domain-containing protein 23	ADA23_HUMAN	isogroup00728	2	isotig03457	3653	AAGGGGGgAGAGCATTGTTACTACCATGGAAaTATCAGAGGTGTGAAGGATTCCAAAGTTGCTCTTTCAACTTGTAATGGACTTCATGGCATGTTTGAAGATAGTACTTATTTGTACTTGATAGAACCGATGGATCTGACCCACACAGCAGAAAGTAAAAGTAGGCCACATATCATCCAAAGAACTTACGGAACACAAGCCTCCAAGCAGTCACAGGACTTTGAGACTGACTCTAGTTCTGAATGGCCCTTTCTGTCTGAACTGCAGTGGCTGAGGAGAAGGAGAAGAAAGAGAGCATTATCTCGTGGTGTCTTTGAAGAAATGAAATATCTGGAGCTCATGATAGTCAATGACCATAAAATGTTCAAAAGGCACCGTTCTTCAACTGCATACACAAAC…	cell adhesion [GO:0007155]; central nervous system development [GO:0007417]	ann.char.bf
Alpha-2A adrenergic receptor	ADA2A_CAVPO	isogroup08073	1	isotig12462	1391	CAGCAGGCTGACCAgggggTGGCAGAGTGCAAGATCAACGATGAGAAGTGGTACATCATCTCTTCCAGCATCGGCTCCTTCTttGCCCCGTGCCTCATCATGATCCTGGTCTACATGCGCATCTACCAGATAGCcaaGAGGagaacAAgggTCccgccGAAcaagcgggcagagcgccccgaGAAGAAGCAGaatgGCTTGACTGACAAggaggACCTGccAgccacaGCCCAGCTCAACGGggaGAAGGcagcaggaggcagtggtgggCaagagggagaggtcaatGGCAtAGACATGGAGGAGACCTCTtCCTCCGAGCACcAGGAGAACAACCAGTGTAAGAAGTCAGAGAGACCATCGAGAGGAAAGACCAAGACTAAGCTGAGCCAAATTAAG…	platelet activation [GO:0030168]; regulation of smooth muscle contraction [GO:0006940]; regulation of vasoconstriction [GO:0019229]	ann.char.bf
Disintegrin and metalloproteinase domain-containing protein 30	ADA30_HUMAN	isogroup04290	1	isotig08679	2528	TGGtAATGGAAAGGTCTGCAGGCACTTCCAGTGTGTGAGTGCCTCTCTCcTGAACTACGATTGTGACGTGGAGAAGCAGTGCCACGGCCATGGGgTGTGCAaTAACAACAGGAACTGTCACTGTGAAGCAGGCTGGGCCCCCcTtCcTtGtGAGTCcAAaGgcTACGGGGgCAGCGTGGACAGTGGCCCTCCATACAATGACAAGGACACCTCTCTGCGCAACGGGCTGCTCGTGTTCTTCTTCCTGGTGCTCCCCCTGCTCGTGGTTGCTGCCCTGGCCTTTGCCAAGAGGGACAGGCTGAAGAGAGGCTGCAGGAGGCTGGTGTCCCGCTGCCACTCGTCACTTCAGTCTCCTCCTCCTCGGCCAGACACCGAACCCAGGGACTTCCAGCAGAGAGG…	binding of sperm to zona pellucida [GO:0007339]	ann.char.bf
Adenosine deaminase-like protein	ADAL_HUMAN	isogroup05519	1	isotig09908	2002	ggcaGgTACCTGGAGAGGGCAGAGTGAaCCCTGtGgCTGCCCAGGGCAGGGAGAGACAGGGGCTGCcAAAgCAGCAGGGgcGAGGcTGgCaggCaGgAgCTCACCCCACAATCCTGCTTCTCTTCTGCAGaGCTCAAACACACaTGTGCaCACcTTGAAGTGGTTGTTTCAAAAATGgAGCTTGAGGCTATTTTtATTGCTTTTTTttACACAACAAACAGCAATTCTAAAAAGCATTTTAaGAATGAGACCACTTTGCCAAGTAGCTCAGTTACTGAAGGCATTCAAGATTTTtAAGTGCCTACACACTGCcAGTGCCcAGAGCTCTAGCAGAGATCTCCACGTGCTACTCAATCCACACAGCTTCAGTCATATATGTACAACAATAAAGCCAGATAC…	adenosine catabolic process [GO:0006154]; drug metabolic process [GO:0017144]; inosine biosynthetic process [GO:0046103]; nucleotide metabolic process [GO:0009117]; purine-containing compound salvage [GO:0043101]	ann.char.bf
Disintegrin and metalloproteinase domain-containing protein 9	ADAM9_HUMAN	isogroup13227	1	isotig17616	775	CTTATGATCCTCCTGCCGCCGCCGGCCGCGCCTGGGCAGCCTGCGGGTTTCCAGGACATTTCCCTGCTCACTTCCTACGAAGTTGTAACTCCCCAGAGATTGGGAAGGGAACGACGAGAGGCTTCCAACAGCACCTCCATACAGGACAAGGTGTCATATGCTATTGAGATTGAGGGgAAAGAATACACCATCCATCTAGAAAAGAACAAAGAACTGCTGCCCAAAGATTTCACAGTTTATACCTATGACAAGGAGGGAAAGCTGCAATTGGACCATCCAGATGTCCAGGATCACTGCCATTATCAGGGATTCGTGGAGGGGAGCCTGGATTCCCTGGTGGCTGTCAGCACTTGCTCAGGGCTCAGGGGTTTGGTGACAATAGGGAATGTCACCTATGGG…	activation of MAPKK activity [GO:0000186]; cell adhesion [GO:0007155]; cell adhesion mediated by integrin [GO:0033627]; cell-cell adhesion mediated by integrin [GO:0033631]; cell-matrix adhesion [GO:0007160]; cell migration [GO:0016477]; cellular response to lipopolysaccharide [GO:0071222]; integrin-mediated signaling pathway [GO:0007229]; keratinocyte differentiation [GO:0030216]; membrane prote…	ann.char.bf
Arf-GAP with dual PH domain-containing protein 1	ADAP1_HUMAN	isogroup07689	1	isotig12078	1459	TTTTCCCCTGCCTGTGCTCGGCCGgCTCAGGtGCACCGACAGgCCTcTGTACCCTTTCcATTAACCTtAGGCTtCTCTTGCCTTCCTCTTTtCCCTCTGTCTGCCAGAGCCTGTTtCtCTGgTGGCTCCTTCTCTCCTGGATAacGCAGTGGGTTGGCCTGCAGGTGCATAAGGTGCAGGCAGCTGCCCTCCTGGCCCTGTCCTGCCCTGCCTGGAGGGATACCATTCCGACGCGATGGCTGGAGGAAACGAGCGCAGCATGAAGGCCCTGAAGGAAGTGTGGAAAAGAGCAGAGAACTCTTTGTGTGCAGACTGTGGGAAGCCAGATCCTGACTGGGCATCCTCCACTTTGGGTGTCTTTATATGCCTCAGCTGTTCAGGAATTCACCGCAACATCCC…	cell surface receptor signaling pathway [GO:0007166]; regulation of GTPase activity [GO:0043087]	ann.char.bf
Arf-GAP with dual PH domain-containing protein 1	ADAP1_HUMAN	isogroup05408	1	isotig09797	2037	AGGTCAGCAGggTGAAGTCCGTGCGCCTGGACGACTGGGACGATGCCCAGGTGGAGTTTATGGCCTCGAATGGAAACAATGTAGCAAAAGCAAAATATGAATCTAAAATGCCACCATTTTATTATAAACCAACATATCTTGACTGCCAACTGCTGCGGGAGCAGTGGATCCGAGCCAAATACGAACGAAAGGAGTTCATCCACAGTGAGAAGCAGGAGCCTTACTCTGCAGGGTACAGAGAAGGATTTCTGTGGAAGAGAGGACGTGACAATGGGCAATTCTTAAGCCGAAAATTCGTGTTATCAGAGAGGGAAGGTGCTCTGAAGTACTTCAACAAAAACGATGCAAAGgAACCCAAAGCGATTATGAAGATCGAgCACCTCAACGCGACTTTCCAGC…	cell surface receptor signaling pathway [GO:0007166]; regulation of GTPase activity [GO:0043087]	ann.char.bf
Alkyldihydroxyacetonephosphate synthase, peroxisomal	ADAS_HUMAN	isogroup02655	1	isotig07044	4894	CGGGCCGGCcTCCGGCTCTATCCCGAAGAAGCGGCAaGAaCTTTTGAAGTGGAATGGATGGGGATATAATGATTCCAAATTCATCTTCAATAAGAAGGGTCAAGCAGAATTTACAGGAAAAAGGTACAGATTAGGTGGTATGGTATTACCAACTTTTAAGGAATGGATAGAAAAAACCTTTGGAGCAAGTCTGGAGCACAAAACTACCTCTAGAGCATCCTTAAATGTTAATGATGTACCTCCATCCATTGTAAATGAAGAATTTCTTCAGGATCTTAGAGCCACTAAAATCTCATATTCCCAGGATGCAGAAGATAGGGTATTCAGAGCTCATGGTCACTGCCTACACGAGATATTTGTACTCAGGGAAGGAATGTTTAAACGAATTCCTGATATAGT…	ether lipid biosynthetic process [GO:0008611]; lipid biosynthetic process [GO:0008610]	ann.char.bf
tRNA-specific adenosine deaminase 1	ADAT1_CHICK	isogroup06092	1	isotig10481	1811	GTGGAGATGCTTCTATTTTtCCTATCAGTGAACCaGAGAACCAGCTTtCtAAGCCAGTGACTGGAGGTCATGCAGCTGGACAATCAGCAGAATGTAGAaGAAaCCATAaTCACTtGTGTCCAGAAGATAAAAGGAAATcaaaGAtGGCAAGTAATCATAtAATCAaGAGAATGAAAaCTGATGATGGTGATTGTTTTtCcATAATCACtGAAGACCTGGCCGTTCAGCATGAATCTGTGAAACGAGAAGACAaCACAAaTCAAAaGAGCTGTGAATGTTCTGCAGAGATGCAAGCCACTAATAAGGATACTGGCTTAGTGAGACCAAAGGTAGTAGATGTTCACAGAaCCGGAGCAAAATGTGTTCCTGGAGAGCTGGATGATGCCcGAaTACCTGGGC…	tRNA processing [GO:0008033]	ann.char.bf
tRNA-specific adenosine deaminase 2	ADAT2_MOUSE	isogroup00529	3	isotig02928	1659	GGGTCTGCACCCACCTCCATGGTGAATAGCAAGAGACTCAAGAGTGAAAaaGAGATGGTGCAGTTATGACAAACAACTGCTAGAGATTAAAAaTATATTTtAGAGATATTGGTTAGCATGTAAAATGGGCTAAGTGCAGTGCAGTGTTCAGTTTTGAATGTTGTATCAATCAGTAAACCATGTCTTTATATGCTCCTGCTATGGGGATTCATGCTTCCCcTTTTCTGAAAAAGgCTGGATGTGCATCTTACATCATtCAAAAGTAAGTTCTGATTTTATGAGGGAGGAATTGTaGCTCAGACTAATTtAGTTTGAaGAGTACAAGCACATTTTAGGAAaTTTGATGActGCCTAGATCAGGCTGTTGTGCTTCCTGCTTGTTTTTcACTTAATACCTTG…	tRNA modification [GO:0006400]; tRNA wobble adenosine to inosine editing [GO:0002100]	ann.char.bf
tRNA-specific adenosine deaminase 2	ADAT2_MOUSE	isogroup00529	3	isotig02929	1546	gACGCGGCCGCGCTGGCCTGGATGGACCAGGCACTCGACGTGgCCAGAGAGGCGCTGGAgAAAGGGGAGGTTCCCGTGGGCTGCCTGCTGgTCTACGACGGCGAGGTGATAGGCAGGGgCAGGAACGAGGTGAACGAGACGAAGAACGCtACTCGACATGCAGAAATGGTGGCAATCGACCAGGTCcTTGaCTGGTGCAAtCAACACCAGAGGGaTTATAGGGAAGTGTTTCCACaGCTGGTGTTGTATGTAACTGTAGAGCCCTGTATCATGTGTGCAGCTGCCCTGCGCTTGATGAAAATTCCACGGGTCGTGTATGGCTGTCGAAATGAGCGATTTGGAGGCTGTGGCTCCGTTTTGAGCATCTCgTCTGATGCTATGGTGGACTCAGGAGACCCA…	tRNA modification [GO:0006400]; tRNA wobble adenosine to inosine editing [GO:0002100]	ann.char.bf
Arginine decarboxylase	ADC_HUMAN	isogroup16281	1	isotig20670	514	AGGGGGAAACCTGAGTCCCAGAAACTGAAAATTAATGAGGCAAAAaTCCTATTTTTAATATTACTAACATTTTAATATTATTGCTGTTATTATAAAGAGAGCCAGCTCGCCTCTGGCTGTTGTTCTGGGGGACAGGAGAGCCCTGGAGTGTCCCCTTCCCcATTCTCAaGGGgCTGCTCCTTCCTCTGGCTCCCCTTTGGGTGTCTCCACTTGCAGGAAAGCCATCCAGCTCTTCCAGGAAAAGCCACCCcAGACAGAAGATGACCGTGAgAGCCTCTGCACCCCCTTGTCCTGTGGCTGGGAGATGGCAGAGACACTTTGTGTCACCCCTGTCTTTGCTCCAGCTGGCATCATCTGAGCACTGGGGGAGAAGGAGCCACGGTGGGAAAGGTCCTGTGG…	agmatine biosynthetic process [GO:0097055]; negative regulation of protein catabolic process [GO:0042177]; positive regulation of catalytic activity [GO:0043085]; positive regulation of polyamine transmembrane transport [GO:1902269]; putrescine biosynthetic process from ornithine [GO:0033387]; putrescine transport [GO:0015847]; spermatogenesis [GO:0007283]; trans-Golgi network membrane organizati…	ann.char.bf
Chaperone activity of bc1 complex-like, mitochondrial	ADCK3_BOVIN	isogroup00479	3	isotig02785	2406	TTGTGGAGTGCTGGTGCTTTATCTCCTGGTCTTACTGTTGCtGTGTGGGATTACTGCCCAACCCAGCTCCTTGGGACTGCAGGTTGCAACACTGCTGGTGTAaGGACTGGCTGTTGGTCTTGGCATTGGGGCACTGGCAGAAGTGGCAAAGAAGAGCCTTAGACCTGAGGAACGCAGTGGGAAGAAAGCAGTGATGGATTCTAGCCCGTTCCTGTCAGAGGCCAATGCAGAAAGGATTGTGAGGACCTTGTGCAAAGTgCGGGGAGCAGCACTGAAGCTGGGACAGATGCTAAGCATtCAAGATGATGCCTTCATCAATCCCcACcTCCAGAGGATTTTTGAGCGTGTcCGTCAGAGTGCTGACTTCATGCCAATAAAGCAGATGACGAAAACTCTGAA…	phosphorylation [GO:0016310]; ubiquinone biosynthetic process [GO:0006744]	ann.char.bf
Chaperone activity of bc1 complex-like, mitochondrial	ADCK3_MOUSE	isogroup00479	3	isotig02783	3036	gCCGAGCAGAGCGAAGCGGAGCAGAGCCGGTGGCCGCTGGGCTGTGCCGTGCCGGGCTGGGCACAGAAAGACATCAGTCATGGCAGGGgATGCCATCATGGTCATGAGGGGCTTGACCAAGCTCAGTAAAGCCATCCTGGAAACCCAAGCAGGACAGCTTCGGCAGGTGCTGCTCGGGGGAGATGCAGTCACCATTGCAAAGGCTCTGCAGGCCTCTGCTGAGGAACAGCTCTCTTCTGCCTTGGGGAAAGTGCAGGAACTAGGCAAACAGCAGGAGAACTTTACTGACCTTGGTGAGGATTTtGGGAAAGACTATGACTTCTCAGCCCGAGAGCCATCAGGTGCTCCAATGGACTTCTCCACTGCCCCTGGCAAGCCTCAGGAACACAACACTGAAGG…	phosphorylation [GO:0016310]; ubiquinone biosynthetic process [GO:0006744]	ann.char.bf
Chaperone activity of bc1 complex-like, mitochondrial	ADCK3_MOUSE	isogroup00479	3	isotig02784	2988	ATGCCAGAGATTCCAGGCATCCTCAGTGTCCCTTCCTTTCTGTCTTGTCTCTTACTGTGAATGTCTGCAGTGCCAGAGTCTCTAAGTCTCTATGATTCCTTGGTGTGGAGACATGACATCTGGCTGCATGCTTGTCTCTGAGGACCATGGATAGGTAAGGAGCAAGGTTCAAGATCTTTTCTTAAAGTGTTTCAATTCTTGTTTTCAGGAACTAGGCAAACAGCAGGAGAACTTTACTGACCTTGGTGAGGATTTtGGGAAAGACTATGACTTCTCAGCCCGAGAGCCATCAGGTGCTCCAATGGACTTCTCCACTGCCCCTGGCAAGCCTCAGGAACACAACACTGAAGGCCCTGCTTACTCCTACACAACAAATGGACCTTTCAGAAATGTTGATGA…	phosphorylation [GO:0016310]; ubiquinone biosynthetic process [GO:0006744]	ann.char.bf
Adenylate cyclase type 2	ADCY2_HUMAN	isogroup13137	1	isotig17526	782	TGCTGCTCATCGTGATGGGCGCCTGCCTAGCCCTGCTCGCCGTCTTcTTCGCCTCGGGGCTGGAAGTTGAAGACCACGTGGCATTTTtAATAACTGTTCCAACAGCCcTAGCAATTTTTTTTGCTATATTtATCCTCGTCTGCGTAGAACCTGTATTTAAGAAGCTGCTTCGTATATTTTCTCTGGTGGTCTGGGTATGTCTTGTTGCCATGGGATATCTCTTTATGTGTTTTGGAGGAATCATCTGTCCCTGGGACCAGGTTTCGTTTTTCTTGTTCATCATTTTTGTGGTGTACACCATGCTGCCCTTCAACATGAGGGATGCTATAGTCGCCAGTGTCCTGACCTCTGCGTCTCACACCATCGTGCTGAGCGTCTGCCTGTCGGGCACAGCTGCTG…	activation of adenylate cyclase activity [GO:0007190]; activation of protein kinase A activity [GO:0034199]; adenylate cyclase-activating G-protein coupled receptor signaling pathway [GO:0007189]; adenylate cyclase-inhibiting G-protein coupled receptor signaling pathway [GO:0007193]; adenylate cyclase-modulating G-protein coupled receptor signaling pathway [GO:0007188]; cAMP biosynthetic process …	ann.char.bf
Adenylate cyclase type 2	ADCY2_HUMAN	isogroup04111	1	isotig08500	2639	GATTaagaTCTTAGGTGACTGCTATTACTGTGTTTCTGGACTACCTATATCTCTTCAAAaTCATGCCAaGAATTGTGTGAAAaTGGGACTGGACATGTGTGAAGCCATTAAGAAGGTGAGAGATGCGACTGGCGTGGACATCAACATGCGCGTGGGCGTGCACTCGGGGAACGTGCTGTGCGGCGTTATCGGGCTGCAGAAGTGGCAGTACGATGTCTGGTCCCACGATGTGACCCTGGCCAACCACATGGAAGCTGGGGGAGTCCCGGGCCGCGTTCACATCACCTCAGTCACCTTGGCACATCTGAATGGAGCTTACAAAGTGGAAGATGGGGACGGAGATGTGAGGGACCCATATCTGAAAGAGCATAATGTTAaGACTtACTTTGTAATCAATCC…	activation of adenylate cyclase activity [GO:0007190]; activation of protein kinase A activity [GO:0034199]; adenylate cyclase-activating G-protein coupled receptor signaling pathway [GO:0007189]; adenylate cyclase-inhibiting G-protein coupled receptor signaling pathway [GO:0007193]; adenylate cyclase-modulating G-protein coupled receptor signaling pathway [GO:0007188]; cAMP biosynthetic process …	ann.char.bf
Adenylate cyclase type 6	ADCY6_HUMAN	isogroup14663	1	isotig19052	657	GGGACTaTGAGGTGGAGCCGGGCCACGGGGgCGAGCgCAACGCCTACCTCAAGGAGCACAaCATCGAGACCTtCCTCATCGTGGGCTGCAGCCAGAAGCGCAAGGAGGAGAAAGCCATCCTGGCCAAGCTGCAGCGCACTCGTGCCAACTCCACCGAGGGGCTGGTGCCGCGCTGGGTGCCCGAGCGCTCCTTCTCCCGCACCAAGGACTCCAaGGCCTTCCGGCAGATGGGCATCGATGACTCCAGCAAGGACAACCGTGGTGCCCAGGAGGCCCTGAACCCCGAGGACGAGGTGGATGAGTTCCTGAGCCGGGCCATCGATGCCCGCAGCATCGACCAGCTCCGCAAGGACCACGTCAAGAAGTTCCTGCTCACCTTCCAGACCCCTGAGCTGGAGA…	activation of adenylate cyclase activity [GO:0007190]; activation of protein kinase A activity [GO:0034199]; adenylate cyclase-activating G-protein coupled receptor signaling pathway [GO:0007189]; adenylate cyclase-inhibiting G-protein coupled receptor signaling pathway [GO:0007193]; cAMP biosynthetic process [GO:0006171]; cellular response to catecholamine stimulus [GO:0071870]; cellular respons…	ann.char.bf
Adenylate cyclase type 6	ADCY6_HUMAN	isogroup12839	1	isotig17228	809	ACATCCTGCCcAAAGATGTGGCCGCACATTTTCTGGCTCGGGAGCGGCGCAACGACGAGCTCTACTACCAGTCCTGCGAGTGTGTGGCCGTCATGTTCGCCTCCATCAGCAACTTCTCCGAGTTCTACGTGGAGCTGGAGGCCAACAACGAGGGcGTGGAGTGCCTGAGGCTGCTCAACGAGATCATCGCTGACTTTGATGAGATCATCAGCGAGCAGAAGTACAGGCAGCTGGAGAAGATCAAGACCATTGgCAGCACCTACATGGCAGCCTCAGGGCTCAACGCGGCCACCTACGACCGCGAGGGCCGCAGCCACATCGCGGCGCTGGCCGACTACGCCATGCACCTCATGGAGCAGATGAAGTACATCAATGAGCACTCCTTCAACAACTTCCAGA…	activation of adenylate cyclase activity [GO:0007190]; activation of protein kinase A activity [GO:0034199]; adenylate cyclase-activating G-protein coupled receptor signaling pathway [GO:0007189]; adenylate cyclase-inhibiting G-protein coupled receptor signaling pathway [GO:0007193]; cAMP biosynthetic process [GO:0006171]; cellular response to catecholamine stimulus [GO:0071870]; cellular respons…	ann.char.bf
Adenylate cyclase type 8	ADCY8_HUMAN	isogroup12630	1	isotig17019	828	TGAGGATAGGGATTCACTCTGGATCAGTTCTGTGTGGAGTGCTGGGCCTGAGAAAGTGGCAGTTTGATGTCTGGTCATGGGACGTGGACATTGCAAACAAACTGGAGTCGGGTGGAATTCCTGGGAGGATTCACATCTCCAAAGCCACTCTGGACTGCCTGAACGGGGAcTACAAAGTTGAAGAAGGGCACGGCAAGGAGCGCAATGAATTCCTGAGGAAACATAACATTGAGACTTATTTAATTAAACAACCTGAGGAGAGTCTGTTGACTTTACCTGAAGATATTGTGAAAGAGGCTGTCAGCTCCTCTGACAGGAGAAACAGTGGAGCTACGTTTACTGAAGGATCCTGGAGCCCTGAGCTTCCATTTGATAACATAGTGGGAAAACAAAATACTC…	activation of adenylate cyclase activity [GO:0007190]; activation of protein kinase A activity [GO:0034199]; adenylate cyclase-activating G-protein coupled receptor signaling pathway [GO:0007189]; adenylate cyclase-inhibiting G-protein coupled receptor signaling pathway [GO:0007193]; cellular response to glucagon stimulus [GO:0071377]; cGMP biosynthetic process [GO:0006182]; intracellular signal …	ann.char.bf
Adenylate cyclase type 9	ADCY9_CHICK	isogroup06238	1	isotig10627	1780	CCCcAAGTTCGACTCCAACAaCCTGGAGGAGGCTTGCATGGAGAGATGCTTCCCGCAGACCCAGCGCAGGTTTCGCTATGCCcTCTTCTACATCGGCGTGGCCTGTCTGCTCTGGGgCATCTATTTCGgCATACACATGAgAGaGAAACAGATtGTTTTCATGgTGCCGGCTCTGTGCTTCCTCCTGGTATGTGTAGCTTTTTTtGTGTTCACTTTCACTAAGACTTATGCCCGCCATTACGTATGGACTTCGCTGATTCTCACCCTCCTGGTGTTTGCTCTGACCCTCGCTCCGCAGTTCCAGGCTCTGAAGCCTGTCTCAGGAAGTGGTGACATGTCCAACCGGACTCCCCcGGCAGATCCCACAGACACTTGTCTTTCTCAAGTGGGCAGTTTTTC…	adenylate cyclase-activating adrenergic receptor signaling pathway [GO:0071880]; adenylate cyclase-activating G-protein coupled receptor signaling pathway [GO:0007189]; cAMP biosynthetic process [GO:0006171]; cGMP biosynthetic process [GO:0006182]; intracellular signal transduction [GO:0035556]; signal transduction [GO:0007165]	ann.char.bf
Adenylate cyclase type 9	ADCY9_CHICK	isogroup06759	1	isotig11148	1654	TGGCGGCGTCGGGgCTCAACACCTCGCAGTGCCAGGACAGCAGCCATCCCcACGGgCACcTGCAGACCCTTTTtGAATTtGCCAAaGAAATGATGCGGGTGGTGGATGACTtCAaCAaCAaCATGCTGTGGTTTAACTTCAaGCTCCGGATCGGCTTCAACCACGGCCCGCTGACGGCCGGGGTCATCGGCACCACCAAGCTGCTGTACGACATCTGGGGGgACACTGTGAACATCGCCAGCAGGATGgACACCACCGGCGTCGAGTGCCGCATCCAGGTGAGCGAGGAGAGCTACCGCATCCTCAGCAAGATGGgCTATGACTTTGACTACAGGGGGACGGTCAATGTGAAGGGCAAGGGgCAGATGAAGACCTACCTTTACCCCAAGTGCATGGACA…	adenylate cyclase-activating adrenergic receptor signaling pathway [GO:0071880]; adenylate cyclase-activating G-protein coupled receptor signaling pathway [GO:0007189]; cAMP biosynthetic process [GO:0006171]; cGMP biosynthetic process [GO:0006182]; intracellular signal transduction [GO:0035556]; signal transduction [GO:0007165]	ann.char.bf
Alpha-adducin	ADDA_HUMAN	isogroup01012	2	isotig03983	4465	GGCGGCAAGGAGAGGCTGGGGCGCAGACGCTcGttAAgCTCGTTAAGCCCGGAGAAGAGCGGAGGGGgCCGTGTCTGCCTGGAAAACGTGGCGGGGAGTGCGGAAAAACCATCTGCGTGCAGGCTGCCTGCGGTTCCTTAAAACTGTGCTATGAATGGTGATTCTGGTGTGGGGgTGGTGACTTCACCACCTCCAACAACAGCCCCTCATAAAGAGAGGTATTTTGATCGAGTTGATGAAAATAATCCCGAATATTTGAGAGAGAGAAATATGGCACCTGATCTTCGCCAGGATTTTAACATGATGGAACAGAAGAAGAGAGTCTCCATGATTCTTCAAAGCCCAGCCTTCTGTGAAGAATTGGAATCCATGATCCAAGAGCAGTTTAAGAAGGGGAAG…	actin cytoskeleton organization [GO:0030036]; actin filament bundle assembly [GO:0051017]; barbed-end actin filament capping [GO:0051016]; cell morphogenesis [GO:0000902]; cellular response to calcium ion [GO:0071277]; cell volume homeostasis [GO:0006884]; erythrocyte differentiation [GO:0030218]; hemoglobin metabolic process [GO:0020027]; homeostasis of number of cells within a tissue [GO:004887…	ann.char.bf
Alpha-adducin	ADDA_HUMAN	isogroup01012	2	isotig03984	4432	GGCGGCAAGGAGAGGCTGGGGCGCAGACGCTcGttAAgCTCGTTAAGCCCGGAGAAGAGCGGAGGGGgCCGTGTCTGCCTGGAAAACGTGGCGGGGAGTGCGGAAAAACCATCTGCGTGCAGGCTGCCTGCGGTTCCTTAAAACTGTGCTATGAATGGTGATTCTGGTGTGGGGgTGGTGACTTCACCACCTCCAACAACAGCCCCTCATAAAGAGAGGTATTTTGATCGAGTTGATGAAAATAATCCCGAATATTTGAGAGAGAGAAATATGGCACCTGATCTTCGCCAGGATTTTAACATGATGGAACAGAAGAAGAGAGTCTCCATGATTCTTCAAAGCCCAGCCTTCTGTGAAGAATTGGAATCCATGATCCAAGAGCAGTTTAAGAAGGGGAAG…	actin cytoskeleton organization [GO:0030036]; actin filament bundle assembly [GO:0051017]; barbed-end actin filament capping [GO:0051016]; cell morphogenesis [GO:0000902]; cellular response to calcium ion [GO:0071277]; cell volume homeostasis [GO:0006884]; erythrocyte differentiation [GO:0030218]; hemoglobin metabolic process [GO:0020027]; homeostasis of number of cells within a tissue [GO:004887…	ann.char.bf
Gamma-adducin	ADDG_HUMAN	isogroup00712	2	isotig03425	4284	CTGAGGTCAaCTGTATTACTAGaGAGGAGGAGAGCTGTGGAAAaacTCAAGGGgAAGCCTTCCCTCCACAGTGTTGAAGCATGAGTGCTGATGCCAGCCAGGTGGTGATCACTACTCCTCCCCCAGCCACGATGCCTCACAAAGAGCGGTACTTCGATCGCATCAATGAGAATGACCCGGAGTACATCCGGGAGAGAAACATGTCCCCTGACCTGAGACAGGACTTCAACATGATGGAGCAGAGGAAGAGGGTCACCCAGATACTGCAGAGCCCTGCTTTTAGAGAAGATCTGGAATGCCTTATTCAAGAACAGATGAAGAAGGGCAATAACCCCACTGGACTGCTTGCATTACAGCAGATTGCTGAATACATTACAGCGAGCACTTTTACAGGTTTTT…	transmembrane transport [GO:0055085]	ann.char.bf
Gamma-adducin	ADDG_HUMAN	isogroup00712	2	isotig03426	4188	CTGAGGTCAaCTGTATTACTAGaGAGGAGGAGAGCTGTGGAAAaacTCAAGGGgAAGCCTTCCCTCCACAGTGTTGAAGCATGAGTGCTGATGCCAGCCAGGTGGTGATCACTACTCCTCCCCCAGCCACGATGCCTCACAAAGAGCGGTACTTCGATCGCATCAATGAGAATGACCCGGAGTACATCCGGGAGAGAAACATGTCCCCTGACCTGAGACAGGACTTCAACATGATGGAGCAGAGGAAGAGGGTCACCCAGATACTGCAGAGCCCTGCTTTTAGAGAAGATCTGGAATGCCTTATTCAAGAACAGATGAAGAAGGGCAATAACCCCACTGGACTGCTTGCATTACAGCAGATTGCTGAATACATTACAGCGAGCACTTTTACAGGTTTTT…	transmembrane transport [GO:0055085]	ann.char.bf
Alcohol dehydrogenase 1	ADH1_CHICK	isogroup05514	1	isotig09903	2003	AGTCCACTtGTGggAGCACTTCACGCAACCAGCTTCCAGTGTGCTGGAGAGGACTTGGGGTACCAGCAACCCAGCTGCTCTGGGAGTGACTGAGCTCTTGGTGCAAGAATTCAGCAGTGGCAAGATTTGAAACAGACACGCCGGTCAACATGAGCACAGCAGGCAAAGTTATTAAATGCAAGGCAGCTGTGCTGTGGGAAGTCAATAAACCATTCAGTATTGAGGAAGTGGAAGTTGCCCCTCCAAAAGAACATGAAGTTCGCATAAAGATCATGGCTACTGGGATCTGCCGCTCTGATGACCATGTGATAACTGGTGCACTGGTTGAGCCTTTTCCAATAATTCTTGGGCATGAAGCAGCTGGTGTTGTGGAGAGTGTCGGGCAGGGAGTGACTTCAG…		ann.char
Alcohol dehydrogenase 1	ADH1_COLLI	isogroup00042	24	isotig00654	1760	GGGggAGAGCAAGGAAtGGttCAAggGCAGAGTAAATGATAAAaGCCTGCCTGGAGGACTTCTGCCCCCATCCATCTCCCAGCCGCTATCCAGCTCCTCCCCTCTGCATCCAGCATCCCACACAGATTAACCAGCGCTCTCCAGACGCTGCGCACCGGGACTGCTCCCGCTCCACGACGCGGGGATTCTGCAACATTCGGGGGCAGCAGCTTCCCTCCTGCCTGCGACAGCGACAGACACAGCTCTGCTAACACCCCATGGCCACTGCGGGAAAAGTTATCAAGTGCAAGGCTGCTGTTGCCTGGGCCCCaGGCAAGACACTCTCTGTTGAGGAGGTGGAAGTTGCACCCCCAAAGGCAGGaGAAGTCCGGATCAAGATTGTGGCCACAGGCATCTGTC…		ann.char
Alcohol dehydrogenase 1	ADH1_COLLI	isogroup00042	24	isotig00672	1638	ACATtAACCAGCGCTCTCCAGACGCTGCGCACCGGGACTGCTCCCGCTCCACGACGCGGGGATTCTGCAACACGCGGGGGCAGCAGCTTCTCTCCTGCCTGCGACAGCGACAGACACAGCTCTGCTAACACCCCATGGCCACTGCGGGAAAAGTTATCAAGTGCAAGGCTGCTGTTGCCTGGGCCCCAGGCAAACCACTCTCTGTTGAGGAGGTGGAAGTTGCACCCCCAAAGACTGGGGAAGTCCGGATCAAGCTTGTGGCCGCAGGCATTTGTCAAACTGATGAGCACCTTCTGCAAGGCTGCTTTCCCAACGCAGAATTCCCAGTTCTCCCTGGCCATGAAGGAGCTGGAATTGTGGAAAGCATTGGAGAAGGAGTGACCTCTCTGAAACCAGGGG…		ann.char
Alcohol dehydrogenase 1	ADH1_COLLI	isogroup00042	24	isotig00653	1760	GGGggAGAGCAAGGAAtGGttCAAggGCAGAGTAAATGATAAAaGCCTGCCTGGAGGACTTCTGCCCCCATCCATCTCCCAGCCGCTATCCAGCTCCTCCCCTCTGCATCCAGCATCCCACACAGATTAACCAGCGCTCTCCAGACGCTGCGCACCGGGACTGCTCCCGCTCCACGACGCGGGGATTCTGCAACATTCGGGGGCAGCAGCTTCCCTCCTGCCTGCGACAGCGACAGACACAGCTCTGCTAACACCCCATGGCCACTGCGGGAAAAGTTATCAAGTGCAAGGCTGCTGTTGCCTGGGCCCCaGGCAAGACACTCTCTGTTGAGGAGGTGGAAGTTGCACCCCCAAAGGCAGGaGAAGTCCGGATCAAGATTGTGGCCACAGGCATCTGTC…		ann.char
Alcohol dehydrogenase 1	ADH1_COLLI	isogroup00042	24	isotig00659	1761	GGGggAGAGCAAGGAAtGGttCAAggGCAGAGTAAATGATAAAaGCCTGCCTGGAGGACTTCTGCCCCCATCCATCTCCCAGCCGCTATCCAGCTCCTCCCCTCTGCATCCAGCATCCCACACAGATTAACCAGCGCTCTCCAGACGCTGCGCACCGGGACTGCTCCCGCTCCACGACGCGGGGATTCTGCAACATTCGGGGGCAGCAGCTTCCCTCCTGCCTGCGACAGCGACAGACACAGCTCTGCTAACACCCCATGGCCACTGCGGGAAAAGTTATCAAGTGCAAGGCTGCTGTTGCCTGGGCCCCcGGCAAACCACTCTCTGTTGAGGAGGTGGAAGTTGCACCCCCAAAGGCTGGGGAAGTCCGGATCAAGCTTGTGGCCGCAGGCATTTGTC…		ann.char
Alcohol dehydrogenase 1	ADH1_COLLI	isogroup00042	24	isotig00668	1777	GGGggAGAGCAAGGAAtGGttCAAggGCAGAGTAAATGATAAAaGCCTGCCTGGAGGACTTCTGCCCCCATCCATCTCCCAGCCGCTATCCAGCTCCTCCCCTCTGCATCCAGCATCCCACACAGATTAACCAGCGCTCTCCAGACGCTGCGCACCGGGACTGCTCCCGCTCCACGACGCGGGGATTCTGCAACATTCGGGGGCAGCAGCTTCCCTCCTGCCTGCGACAGCGACAGACACAGCTCTGCTAACACCCCATGGCCACTGCGGGAAAAGTTATCAAGTGCAAGGCTGCTGTTGCCTGGGCCCCcGGCAAACCACTCTCTGTTGAGGAGGTGGAAGTTGCACCCCCAAAGGCTGGGGAAGTCCGGATCAAGCTTGTGGCCGCAGGCATTTGTC…		ann.char
Alcohol dehydrogenase 1	ADH1_COLLI	isogroup00042	24	isotig00652	1760	GGGggAGAGCAAGGAAtGGttCAAggGCAGAGTAAATGATAAAaGCCTGCCTGGAGGACTTCTGCCCCCATCCATCTCCCAGCCGCTATCCAGCTCCTCCCCTCTGCATCCAGCATCCCACACAGATTAACCAGCGCTCTCCAGACGCTGCGCACCGGGACTGCTCCCGCTCCACGACGCGGGGATTCTGCAACATTCGGGGGCAGCAGCTTCCCTCCTGCCTGCGACAGCGACAGACACAGCTCTGCTAACACCCCATGGCCACTGCGGGAAAAGTTATCAAGTGCAAGGCTGCTGTTGCCTGGGCCCCaGGCAAGACACTCTCTGTTGAGGAGGTGGAAGTTGCACCCCCAAAGGCAGGaGAAGTCCGGATCAAGATTGTGGCCACAGGCATCTGTC…		ann.char
Alcohol dehydrogenase 1	ADH1_COLLI	isogroup00042	24	isotig00667	1777	GGGggAGAGCAAGGAAtGGttCAAggGCAGAGTAAATGATAAAaGCCTGCCTGGAGGACTTCTGCCCCCATCCATCTCCCAGCCGCTATCCAGCTCCTCCCCTCTGCATCCAGCATCCCACACAGATTAACCAGCGCTCTCCAGACGCTGCGCACCGGGACTGCTCCCGCTCCACGACGCGGGGATTCTGCAACATTCGGGGGCAGCAGCTTCCCTCCTGCCTGCGACAGCGACAGACACAGCTCTGCTAACACCCCATGGCCACTGCGGGAAAAGTTATCAAGTGCAAGGCTGCTGTTGCCTGGGCCCCcGGCAAACCACTCTCTGTTGAGGAGGTGGAAGTTGCACCCCCAAAGGCTGGGGAAGTCCGGATCAAGCTTGTGGCCGCAGGCATTTGTC…		ann.char
Alcohol dehydrogenase 1	ADH1_COLLI	isogroup00042	24	isotig00673	1638	ACATtAACCAGCGCTCTCCAGACGCTGCGCACCGGGACTGCTCCCGCTCCACGACGCGGGGATTCTGCAACACGCGGGGGCAGCAGCTTCTCTCCTGCCTGCGACAGCGACAGACACAGCTCTGCTAACACCCCATGGCCACTGCGGGAAAAGTTATCAAGTGCAAGGCTGCTGTTGCCTGGGCCCCAGGCAAACCACTCTCTGTTGAGGAGGTGGAAGTTGCACCCCCAAAGACTGGGGAAGTCCGGATCAAGCTTGTGGCCGCAGGCATTTGTCAAACTGATGAGCACCTTCTGCAAGGCTGCTTTCCCAACGCAGAATTCCCAGTTCTCCCTGGCCATGAAGGAGCTGGAATTGTGGAAAGCATTGGAGAAGGAGTGACCTCTCTGAAACCAGGGG…		ann.char
Alcohol dehydrogenase 1	ADH1_COLLI	isogroup00042	24	isotig00661	1776	GGGggAGAGCAAGGAAtGGttCAAggGCAGAGTAAATGATAAAaGCCTGCCTGGAGGACTTCTGCCCCCATCCATCTCCCAGCCGCTATCCAGCTCCTCCCCTCTGCATCCAGCATCCCACACAGATTAACCAGCGCTCTCCAGACGCTGCGCACCGGGACTGCTCCCGCTCCACGACGCGGGGATTCTGCAACATTCGGGGGCAGCAGCTTCCCTCCTGCCTGCGACAGCGACAGACACAGCTCTGCTAACACCCCATGGCCACTGCGGGAAAAGTTATCAAGTGCAAGGCTGCTGTTGCCTGGGCCCCaGGCAAGACACTCTCTGTTGAGGAGGTGGAAGTTGCACCCCCAAAGGCAGGaGAAGTCCGGATCAAGATTGTGGCCACAGGCATCTGTC…		ann.char
Alcohol dehydrogenase 1	ADH1_COLLI	isogroup00042	24	isotig00660	1761	GGGggAGAGCAAGGAAtGGttCAAggGCAGAGTAAATGATAAAaGCCTGCCTGGAGGACTTCTGCCCCCATCCATCTCCCAGCCGCTATCCAGCTCCTCCCCTCTGCATCCAGCATCCCACACAGATTAACCAGCGCTCTCCAGACGCTGCGCACCGGGACTGCTCCCGCTCCACGACGCGGGGATTCTGCAACATTCGGGGGCAGCAGCTTCCCTCCTGCCTGCGACAGCGACAGACACAGCTCTGCTAACACCCCATGGCCACTGCGGGAAAAGTTATCAAGTGCAAGGCTGCTGTTGCCTGGGCCCCcGGCAAACCACTCTCTGTTGAGGAGGTGGAAGTTGCACCCCCAAAGGCTGGGGAAGTCCGGATCAAGCTTGTGGCCGCAGGCATTTGTC…		ann.char
Alcohol dehydrogenase 1	ADH1_COLLI	isogroup00042	24	isotig00657	1761	GGGggAGAGCAAGGAAtGGttCAAggGCAGAGTAAATGATAAAaGCCTGCCTGGAGGACTTCTGCCCCCATCCATCTCCCAGCCGCTATCCAGCTCCTCCCCTCTGCATCCAGCATCCCACACAGATTAACCAGCGCTCTCCAGACGCTGCGCACCGGGACTGCTCCCGCTCCACGACGCGGGGATTCTGCAACATTCGGGGGCAGCAGCTTCCCTCCTGCCTGCGACAGCGACAGACACAGCTCTGCTAACACCCCATGGCCACTGCGGGAAAAGTTATCAAGTGCAAGGCTGCTGTTGCCTGGGCCCCcGGCAAACCACTCTCTGTTGAGGAGGTGGAAGTTGCACCCCCAAAGGCTGGGGAAGTCCGGATCAAGCTTGTGGCCGCAGGCATTTGTC…		ann.char
Alcohol dehydrogenase 1	ADH1_COLLI	isogroup00042	24	isotig00664	1761	GGGggAGAGCAAGGAAtGGttCAAggGCAGAGTAAATGATAAAaGCCTGCCTGGAGGACTTCTGCCCCCATCCATCTCCCAGCCGCTATCCAGCTCCTCCCCTCTGCATCCAGCATCCCACACAGATTAACCAGCGCTCTCCAGACGCTGCGCACCGGGACTGCTCCCGCTCCACGACGCGGGGATTCTGCAACATTCGGGGGCAGCAGCTTCCCTCCTGCCTGCGACAGCGACAGACACAGCTCTGCTAACACCCCATGGCCACTGCGGGAAAAGTTATCAAGTGCAAGGCTGCTGTTGCCTGGGCCCCcGGCAAACCACTCTCTGTTGAGGAGGTGGAAGTTGCACCCCCAAAGGCTGGGGAAGTCCGGATCAAGCTTGTGGCCGCAGGCATTTGTC…		ann.char
Alcohol dehydrogenase 1	ADH1_COLLI	isogroup00042	24	isotig00655	1760	GGGggAGAGCAAGGAAtGGttCAAggGCAGAGTAAATGATAAAaGCCTGCCTGGAGGACTTCTGCCCCCATCCATCTCCCAGCCGCTATCCAGCTCCTCCCCTCTGCATCCAGCATCCCACACAGATTAACCAGCGCTCTCCAGACGCTGCGCACCGGGACTGCTCCCGCTCCACGACGCGGGGATTCTGCAACATTCGGGGGCAGCAGCTTCCCTCCTGCCTGCGACAGCGACAGACACAGCTCTGCTAACACCCCATGGCCACTGCGGGAAAAGTTATCAAGTGCAAGGCTGCTGTTGCCTGGGCCCCaGGCAAGACACTCTCTGTTGAGGAGGTGGAAGTTGCACCCCCAAAGGCAGGaGAAGTCCGGATCAAGATTGTGGCCACAGGCATCTGTC…		ann.char
Alcohol dehydrogenase 1	ADH1_COLLI	isogroup00042	24	isotig00669	1777	GGGggAGAGCAAGGAAtGGttCAAggGCAGAGTAAATGATAAAaGCCTGCCTGGAGGACTTCTGCCCCCATCCATCTCCCAGCCGCTATCCAGCTCCTCCCCTCTGCATCCAGCATCCCACACAGATTAACCAGCGCTCTCCAGACGCTGCGCACCGGGACTGCTCCCGCTCCACGACGCGGGGATTCTGCAACATTCGGGGGCAGCAGCTTCCCTCCTGCCTGCGACAGCGACAGACACAGCTCTGCTAACACCCCATGGCCACTGCGGGAAAAGTTATCAAGTGCAAGGCTGCTGTTGCCTGGGCCCCcGGCAAACCACTCTCTGTTGAGGAGGTGGAAGTTGCACCCCCAAAGGCTGGGGAAGTCCGGATCAAGCTTGTGGCCGCAGGCATTTGTC…		ann.char
Alcohol dehydrogenase 1	ADH1_COLLI	isogroup00042	24	isotig00665	1761	GGGggAGAGCAAGGAAtGGttCAAggGCAGAGTAAATGATAAAaGCCTGCCTGGAGGACTTCTGCCCCCATCCATCTCCCAGCCGCTATCCAGCTCCTCCCCTCTGCATCCAGCATCCCACACAGATTAACCAGCGCTCTCCAGACGCTGCGCACCGGGACTGCTCCCGCTCCACGACGCGGGGATTCTGCAACATTCGGGGGCAGCAGCTTCCCTCCTGCCTGCGACAGCGACAGACACAGCTCTGCTAACACCCCATGGCCACTGCGGGAAAAGTTATCAAGTGCAAGGCTGCTGTTGCCTGGGCCCCcGGCAAACCACTCTCTGTTGAGGAGGTGGAAGTTGCACCCCCAAAGGCTGGGGAAGTCCGGATCAAGCTTGTGGCCGCAGGCATTTGTC…		ann.char
Alcohol dehydrogenase 1	ADH1_COLLI	isogroup00042	24	isotig00662	1761	GGGggAGAGCAAGGAAtGGttCAAggGCAGAGTAAATGATAAAaGCCTGCCTGGAGGACTTCTGCCCCCATCCATCTCCCAGCCGCTATCCAGCTCCTCCCCTCTGCATCCAGCATCCCACACAGATTAACCAGCGCTCTCCAGACGCTGCGCACCGGGACTGCTCCCGCTCCACGACGCGGGGATTCTGCAACATTCGGGGGCAGCAGCTTCCCTCCTGCCTGCGACAGCGACAGACACAGCTCTGCTAACACCCCATGGCCACTGCGGGAAAAGTTATCAAGTGCAAGGCTGCTGTTGCCTGGGCCCCcGGCAAACCACTCTCTGTTGAGGAGGTGGAAGTTGCACCCCCAAAGGCTGGGGAAGTCCGGATCAAGCTTGTGGCCGCAGGCATTTGTC…		ann.char
Alcohol dehydrogenase 1	ADH1_COLLI	isogroup00042	24	isotig00670	1638	ACATtAACCAGCGCTCTCCAGACGCTGCGCACCGGGACTGCTCCCGCTCCACGACGCGGGGATTCTGCAACACGCGGGGGCAGCAGCTTCTCTCCTGCCTGCGACAGCGACAGACACAGCTCTGCTAACACCCCATGGCCACTGCGGGAAAAGTTATCAAGTGCAAGGCTGCTGTTGCCTGGGCCCCAGGCAAACCACTCTCTGTTGAGGAGGTGGAAGTTGCACCCCCAAAGACTGGGGAAGTCCGGATCAAGCTTGTGGCCGCAGGCATTTGTCAAACTGATGAGCACCTTCTGCAAGGCTGCTTTCCCAACGCAGAATTCCCAGTTCTCCCTGGCCATGAAGGAGCTGGAATTGTGGAAAGCATTGGAGAAGGAGTGACCTCTCTGAAACCAGGGG…		ann.char
Alcohol dehydrogenase 1	ADH1_COLLI	isogroup00042	24	isotig00656	1776	GGGggAGAGCAAGGAAtGGttCAAggGCAGAGTAAATGATAAAaGCCTGCCTGGAGGACTTCTGCCCCCATCCATCTCCCAGCCGCTATCCAGCTCCTCCCCTCTGCATCCAGCATCCCACACAGATTAACCAGCGCTCTCCAGACGCTGCGCACCGGGACTGCTCCCGCTCCACGACGCGGGGATTCTGCAACATTCGGGGGCAGCAGCTTCCCTCCTGCCTGCGACAGCGACAGACACAGCTCTGCTAACACCCCATGGCCACTGCGGGAAAAGTTATCAAGTGCAAGGCTGCTGTTGCCTGGGCCCCaGGCAAGACACTCTCTGTTGAGGAGGTGGAAGTTGCACCCCCAAAGGCAGGaGAAGTCCGGATCAAGATTGTGGCCACAGGCATCTGTC…		ann.char
Alcohol dehydrogenase 1	ADH1_COLLI	isogroup00042	24	isotig00658	1761	GGGggAGAGCAAGGAAtGGttCAAggGCAGAGTAAATGATAAAaGCCTGCCTGGAGGACTTCTGCCCCCATCCATCTCCCAGCCGCTATCCAGCTCCTCCCCTCTGCATCCAGCATCCCACACAGATTAACCAGCGCTCTCCAGACGCTGCGCACCGGGACTGCTCCCGCTCCACGACGCGGGGATTCTGCAACATTCGGGGGCAGCAGCTTCCCTCCTGCCTGCGACAGCGACAGACACAGCTCTGCTAACACCCCATGGCCACTGCGGGAAAAGTTATCAAGTGCAAGGCTGCTGTTGCCTGGGCCCCcGGCAAACCACTCTCTGTTGAGGAGGTGGAAGTTGCACCCCCAAAGGCTGGGGAAGTCCGGATCAAGCTTGTGGCCGCAGGCATTTGTC…		ann.char
Alcohol dehydrogenase 1	ADH1_COLLI	isogroup00042	24	isotig00663	1761	GGGggAGAGCAAGGAAtGGttCAAggGCAGAGTAAATGATAAAaGCCTGCCTGGAGGACTTCTGCCCCCATCCATCTCCCAGCCGCTATCCAGCTCCTCCCCTCTGCATCCAGCATCCCACACAGATTAACCAGCGCTCTCCAGACGCTGCGCACCGGGACTGCTCCCGCTCCACGACGCGGGGATTCTGCAACATTCGGGGGCAGCAGCTTCCCTCCTGCCTGCGACAGCGACAGACACAGCTCTGCTAACACCCCATGGCCACTGCGGGAAAAGTTATCAAGTGCAAGGCTGCTGTTGCCTGGGCCCCcGGCAAACCACTCTCTGTTGAGGAGGTGGAAGTTGCACCCCCAAAGGCTGGGGAAGTCCGGATCAAGCTTGTGGCCGCAGGCATTTGTC…		ann.char
Alcohol dehydrogenase 1	ADH1_COLLI	isogroup00042	24	isotig00674	1654	ACATtAACCAGCGCTCTCCAGACGCTGCGCACCGGGACTGCTCCCGCTCCACGACGCGGGGATTCTGCAACACGCGGGGGCAGCAGCTTCTCTCCTGCCTGCGACAGCGACAGACACAGCTCTGCTAACACCCCATGGCCACTGCGGGAAAAGTTATCAAGTGCAAGGCTGCTGTTGCCTGGGCCCCAGGCAAACCACTCTCTGTTGAGGAGGTGGAAGTTGCACCCCCAAAGACTGGGGAAGTCCGGATCAAGCTTGTGGCCGCAGGCATTTGTCAAACTGATGAGCACCTTCTGCAAGGCTGCTTTCCCAACGCAGAATTCCCAGTTCTCCCTGGCCATGAAGGAGCTGGAATTGTGGAAAGCATTGGAGAAGGAGTGACCTCTCTGAAACCAGGGG…		ann.char
Alcohol dehydrogenase 1	ADH1_COLLI	isogroup00042	24	isotig00671	1638	ACATtAACCAGCGCTCTCCAGACGCTGCGCACCGGGACTGCTCCCGCTCCACGACGCGGGGATTCTGCAACACGCGGGGGCAGCAGCTTCTCTCCTGCCTGCGACAGCGACAGACACAGCTCTGCTAACACCCCATGGCCACTGCGGGAAAAGTTATCAAGTGCAAGGCTGCTGTTGCCTGGGCCCCAGGCAAACCACTCTCTGTTGAGGAGGTGGAAGTTGCACCCCCAAAGACTGGGGAAGTCCGGATCAAGCTTGTGGCCGCAGGCATTTGTCAAACTGATGAGCACCTTCTGCAAGGCTGCTTTCCCAACGCAGAATTCCCAGTTCTCCCTGGCCATGAAGGAGCTGGAATTGTGGAAAGCATTGGAGAAGGAGTGACCTCTCTGAAACCAGGGG…		ann.char
Alcohol dehydrogenase 1	ADH1_COLLI	isogroup00042	24	isotig00666	1777	GGGggAGAGCAAGGAAtGGttCAAggGCAGAGTAAATGATAAAaGCCTGCCTGGAGGACTTCTGCCCCCATCCATCTCCCAGCCGCTATCCAGCTCCTCCCCTCTGCATCCAGCATCCCACACAGATTAACCAGCGCTCTCCAGACGCTGCGCACCGGGACTGCTCCCGCTCCACGACGCGGGGATTCTGCAACATTCGGGGGCAGCAGCTTCCCTCCTGCCTGCGACAGCGACAGACACAGCTCTGCTAACACCCCATGGCCACTGCGGGAAAAGTTATCAAGTGCAAGGCTGCTGTTGCCTGGGCCCCcGGCAAACCACTCTCTGTTGAGGAGGTGGAAGTTGCACCCCCAAAGGCTGGGGAAGTCCGGATCAAGCTTGTGGCCGCAGGCATTTGTC…		ann.char
Alcohol dehydrogenase 1	ADH1_COLLI	isogroup00042	24	isotig00675	1654	ACATtAACCAGCGCTCTCCAGACGCTGCGCACCGGGACTGCTCCCGCTCCACGACGCGGGGATTCTGCAACACGCGGGGGCAGCAGCTTCTCTCCTGCCTGCGACAGCGACAGACACAGCTCTGCTAACACCCCATGGCCACTGCGGGAAAAGTTATCAAGTGCAAGGCTGCTGTTGCCTGGGCCCCAGGCAAACCACTCTCTGTTGAGGAGGTGGAAGTTGCACCCCCAAAGACTGGGGAAGTCCGGATCAAGCTTGTGGCCGCAGGCATTTGTCAAACTGATGAGCACCTTCTGCAAGGCTGCTTTCCCAACGCAGAATTCCCAGTTCTCCCTGGCCATGAAGGAGCTGGAATTGTGGAAAGCATTGGAGAAGGAGTGACCTCTCTGAAACCAGGGG…		ann.char
Alcohol dehydrogenase class-3	ADHX_SAAHA	isogroup07826	1	isotig12215	1434	CTTCcGCTGGCAGCCGTAGCCGTGCGCGATGGCGAGCGGGGTCATTAAATGCAAGGCTGCTGTTGCCTGGGAGGCAGGTAAGCCTCTCTCTATTGAGGAAGTGGAGGTTGCTCCACCAAAAGCCCATGAAGTTCGCATCAAGATAGTTGCCACTGCTGTCTGTCACACTGATGCCTATACTCTGAGTGGTGCTGATCCTGAAGGATGTTTCCCTGTGATCCTGGGACATGAAGGAGCAGGAATTGTAGAGAGTGTTGGCGAAGGAGTAACAAAAGTAAAGAAGGGGgACACTGTTATCCCTCTATACATCCCTCAGTGTGGAGAGTGCAAGTTCTGTAAGAATCCCAAAACAAACCTGTGCCAGAAAATAAGAATTACTCAAGGGAAAGGAGTCATGCC…	ethanol oxidation [GO:0006069]	ann.char.bf
Afadin- and alpha-actinin-binding protein	ADIP_MOUSE	isogroup06553	1	isotig10942	1698	GGTGCCTTCTGCACAGAAGAGAATCTTGAACAGAGTATATCCTATATTGATAGGGAATTAACAACAATGGGCTTTCCTTCTATTTATGCAGAGCCCAAAGGAAAAGAATTAAATttAGTATGTATCATAAATTGTATGAaTGAGTTGCTTGTACTGCAGCACAAGAACCTTCGAGCTCAGGAAGAAGTAGAAATACAGCATCTGAAGCTGGGAAGTGATATGGATCACTTACAGAACTGCTATGCTAAATTAAAGGAACAGTTGgAATTATCTAAAAGGGAAATAGTTGGGCTTCAGGAAAGAGACAGACAACTGCAAAGCAAGAACAGAAATTTGCACCAGTTACTTAAAAATGAAAAGGATGAAGTTCAGAAGCTACAGAACATAATTTCAAGTAGA…	cell adhesion [GO:0007155]; centrosome cycle [GO:0007098]; cilium assembly [GO:0060271]; intraciliary transport involved in cilium assembly [GO:0035735]; regulation of cell motility [GO:2000145]; regulation of Rac protein signal transduction [GO:0035020]	ann.char.bf
Adiponectin	ADIPO_MOUSE	isogroup00048	18	isotig00737	2378	ATAATTCATTtACTAACACACTTATTCACCCTTGTGCTTGCATTGCTGCAAGCTGGACACACTTTCTCCCCcAGCCACTAACAaCATTCCCAgTTTGCAGAaAGCAGCAGCCCAGGTTGAGCAGGCTCTCACACAGGCTCTCCAGCAAACCACTGCTCTTCCAGTTCCTGTCCAACTCCCAAACCCATCTTTTCCCTGTAAGGCCATCTTCACAAGCTATCCCAGTAGATTATACATCTGTTCCAAAACTTCAGTTATGTCcAGGAAAAAATGAATGGGAAAaCCCAACTTTTAGGTCAGCATGCGCAATAGCAAATGGAAAGTGCAGTGTCTGAGCTGACAGCTCCCGTGCCCTTAGGGACAGCGATGCAATAGCCAGACTTCATTCTCTAAACAGAC…	adiponectin-activated signaling pathway [GO:0033211]; brown fat cell differentiation [GO:0050873]; cellular response to cAMP [GO:0071320]; cellular response to drug [GO:0035690]; cellular response to epinephrine stimulus [GO:0071872]; cellular response to insulin stimulus [GO:0032869]; circadian rhythm [GO:0007623]; detection of oxidative stress [GO:0070994]; fatty acid beta-oxidation [GO:0006635…	ann.char.bf
Adiponectin	ADIPO_MOUSE	isogroup00048	18	isotig00743	2383	ATAATTCATTtACTAACACACTTATTCACCCTTGTGCTTGCATTGCTGCAAGCTGGACACACTTTCTCCCCcAGCCACTAACAaCATTCCCAgTTTGCAGAaAGCAGCAGCCCAGGTTGAGCAGGCTCTCACACAGGCTCTCCAGCAAACCACTGCTCTTCCAGTTCCTGTCCAACTCCCAAACCCATCTTTTCCCTGTAAGGCCATCTTCACAAGCTATCCCAGTAGATTATACATCTGTTCCAAAACTTCAGTTATGTCcAGGAAAAAATGAATGGGAAAaCCCAACTTTTAGGTCAGCATGCGCAATAGCAAATGGAAAGTGCAGTGTCTGAGCTGACAGCTCCCGTGCCCTTAGGGACAGCGATGCAATAGCCAGACTTCATTCTCTAAACAGAC…	adiponectin-activated signaling pathway [GO:0033211]; brown fat cell differentiation [GO:0050873]; cellular response to cAMP [GO:0071320]; cellular response to drug [GO:0035690]; cellular response to epinephrine stimulus [GO:0071872]; cellular response to insulin stimulus [GO:0032869]; circadian rhythm [GO:0007623]; detection of oxidative stress [GO:0070994]; fatty acid beta-oxidation [GO:0006635…	ann.char.bf
Adiponectin	ADIPO_MOUSE	isogroup00048	18	isotig00733	2379	ATAATTCATTtACTAACACACTTATTCACCCTTGTGCTTGCATTGCTGCAAGCTGGACACACTTTCTCCCCcAGCCACTAACAaCATTCCCAgTTTGCAGAaAGCAGCAGCCCAGGTTGAGCAGGCTCTCACACAGGCTCTCCAGCAAACCACTGCTCTTCCAGTTCCTGTCCAACTCCCAAACCCATCTTTTCCCTGTAAGGCCATCTTCACAAGCTATCCCAGTAGATTATACATCTGTTCCAAAACTTCAGTTATGTCcAGGAAAAAATGAATGGGAAAaCCCAACTTTTAGGTCAGCATGCGCAATAGCAAATGGAAAGTGCAGTGTCTGAGCTGACAGCTCCCGTGCCCTTAGGGACAGCGATGCAATAGCCAGACTTCATTCTCTAAACAGAC…	adiponectin-activated signaling pathway [GO:0033211]; brown fat cell differentiation [GO:0050873]; cellular response to cAMP [GO:0071320]; cellular response to drug [GO:0035690]; cellular response to epinephrine stimulus [GO:0071872]; cellular response to insulin stimulus [GO:0032869]; circadian rhythm [GO:0007623]; detection of oxidative stress [GO:0070994]; fatty acid beta-oxidation [GO:0006635…	ann.char.bf
Adiponectin	ADIPO_MOUSE	isogroup00048	18	isotig00744	2369	ATAATTCATTtACTAACACACTTATTCACCCTTGTGCTTGCATTGCTGCAAGCTGGACACACTTTCTCCCCcAGCCACTAACAaCATTCCCAgTTTGCAGAaAGCAGCAGCCCAGGTTGAGCAGGCTCTCACACAGGCTCTCCAGCAAACCACTGCTCTTCCAGTTCCTGTCCAACTCCCAAACCCATCTTTTCCCTGTAAGGCCATCTTCACAAGCTATCCCAGTAGATTATACATCTGTTCCAAAACTTCAGTTATGTCcAGGAAAAAATGAATGGGAAAaCCCAACTTTTAGGTCAGCATGCGCAATAGCAAATGGAAAGTGCAGTGTCTGAGCTGACAGCTCCCGTGCCCTTAGGGACAGCGATGCAATAGCCAGACTTCATTCTCTAAACAGAC…	adiponectin-activated signaling pathway [GO:0033211]; brown fat cell differentiation [GO:0050873]; cellular response to cAMP [GO:0071320]; cellular response to drug [GO:0035690]; cellular response to epinephrine stimulus [GO:0071872]; cellular response to insulin stimulus [GO:0032869]; circadian rhythm [GO:0007623]; detection of oxidative stress [GO:0070994]; fatty acid beta-oxidation [GO:0006635…	ann.char.bf
Adiponectin	ADIPO_MOUSE	isogroup00048	18	isotig00738	2368	ATAATTCATTtACTAACACACTTATTCACCCTTGTGCTTGCATTGCTGCAAGCTGGACACACTTTCTCCCCcAGCCACTAACAaCATTCCCAgTTTGCAGAaAGCAGCAGCCCAGGTTGAGCAGGCTCTCACACAGGCTCTCCAGCAAACCACTGCTCTTCCAGTTCCTGTCCAACTCCCAAACCCATCTTTTCCCTGTAAGGCCATCTTCACAAGCTATCCCAGTAGATTATACATCTGTTCCAAAACTTCAGTTATGTCcAGGAAAAAATGAATGGGAAAaCCCAACTTTTAGGTCAGCATGCGCAATAGCAAATGGAAAGTGCAGTGTCTGAGCTGACAGCTCCCGTGCCCTTAGGGACAGCGATGCAATAGCCAGACTTCATTCTCTAAACAGAC…	adiponectin-activated signaling pathway [GO:0033211]; brown fat cell differentiation [GO:0050873]; cellular response to cAMP [GO:0071320]; cellular response to drug [GO:0035690]; cellular response to epinephrine stimulus [GO:0071872]; cellular response to insulin stimulus [GO:0032869]; circadian rhythm [GO:0007623]; detection of oxidative stress [GO:0070994]; fatty acid beta-oxidation [GO:0006635…	ann.char.bf
Adiponectin	ADIPO_MOUSE	isogroup00048	18	isotig00740	2378	ATAATTCATTtACTAACACACTTATTCACCCTTGTGCTTGCATTGCTGCAAGCTGGACACACTTTCTCCCCcAGCCACTAACAaCATTCCCAgTTTGCAGAaAGCAGCAGCCCAGGTTGAGCAGGCTCTCACACAGGCTCTCCAGCAAACCACTGCTCTTCCAGTTCCTGTCCAACTCCCAAACCCATCTTTTCCCTGTAAGGCCATCTTCACAAGCTATCCCAGTAGATTATACATCTGTTCCAAAACTTCAGTTATGTCcAGGAAAAAATGAATGGGAAAaCCCAACTTTTAGGTCAGCATGCGCAATAGCAAATGGAAAGTGCAGTGTCTGAGCTGACAGCTCCCGTGCCCTTAGGGACAGCGATGCAATAGCCAGACTTCATTCTCTAAACAGAC…	adiponectin-activated signaling pathway [GO:0033211]; brown fat cell differentiation [GO:0050873]; cellular response to cAMP [GO:0071320]; cellular response to drug [GO:0035690]; cellular response to epinephrine stimulus [GO:0071872]; cellular response to insulin stimulus [GO:0032869]; circadian rhythm [GO:0007623]; detection of oxidative stress [GO:0070994]; fatty acid beta-oxidation [GO:0006635…	ann.char.bf
Adiponectin	ADIPO_MOUSE	isogroup00048	18	isotig00747	2368	ATAATTCATTtACTAACACACTTATTCACCCTTGTGCTTGCATTGCTGCAAGCTGGACACACTTTCTCCCCcAGCCACTAACAaCATTCCCAgTTTGCAGAaAGCAGCAGCCCAGGTTGAGCAGGCTCTCACACAGGCTCTCCAGCAAACCACTGCTCTTCCAGTTCCTGTCCAACTCCCAAACCCATCTTTTCCCTGTAAGGCCATCTTCACAAGCTATCCCAGTAGATTATACATCTGTTCCAAAACTTCAGTTATGTCcAGGAAAAAATGAATGGGAAAaCCCAACTTTTAGGTCAGCATGCGCAATAGCAAATGGAAAGTGCAGTGTCTGAGCTGACAGCTCCCGTGCCCTTAGGGACAGCGATGCAATAGCCAGACTTCATTCTCTAAACAGAC…	adiponectin-activated signaling pathway [GO:0033211]; brown fat cell differentiation [GO:0050873]; cellular response to cAMP [GO:0071320]; cellular response to drug [GO:0035690]; cellular response to epinephrine stimulus [GO:0071872]; cellular response to insulin stimulus [GO:0032869]; circadian rhythm [GO:0007623]; detection of oxidative stress [GO:0070994]; fatty acid beta-oxidation [GO:0006635…	ann.char.bf
Adiponectin	ADIPO_MOUSE	isogroup00048	18	isotig00746	2368	ATAATTCATTtACTAACACACTTATTCACCCTTGTGCTTGCATTGCTGCAAGCTGGACACACTTTCTCCCCcAGCCACTAACAaCATTCCCAgTTTGCAGAaAGCAGCAGCCCAGGTTGAGCAGGCTCTCACACAGGCTCTCCAGCAAACCACTGCTCTTCCAGTTCCTGTCCAACTCCCAAACCCATCTTTTCCCTGTAAGGCCATCTTCACAAGCTATCCCAGTAGATTATACATCTGTTCCAAAACTTCAGTTATGTCcAGGAAAAAATGAATGGGAAAaCCCAACTTTTAGGTCAGCATGCGCAATAGCAAATGGAAAGTGCAGTGTCTGAGCTGACAGCTCCCGTGCCCTTAGGGACAGCGATGCAATAGCCAGACTTCATTCTCTAAACAGAC…	adiponectin-activated signaling pathway [GO:0033211]; brown fat cell differentiation [GO:0050873]; cellular response to cAMP [GO:0071320]; cellular response to drug [GO:0035690]; cellular response to epinephrine stimulus [GO:0071872]; cellular response to insulin stimulus [GO:0032869]; circadian rhythm [GO:0007623]; detection of oxidative stress [GO:0070994]; fatty acid beta-oxidation [GO:0006635…	ann.char.bf
Adiponectin	ADIPO_MOUSE	isogroup00048	18	isotig00731	2378	ATAATTCATTtACTAACACACTTATTCACCCTTGTGCTTGCATTGCTGCAAGCTGGACACACTTTCTCCCCcAGCCACTAACAaCATTCCCAgTTTGCAGAaAGCAGCAGCCCAGGTTGAGCAGGCTCTCACACAGGCTCTCCAGCAAACCACTGCTCTTCCAGTTCCTGTCCAACTCCCAAACCCATCTTTTCCCTGTAAGGCCATCTTCACAAGCTATCCCAGTAGATTATACATCTGTTCCAAAACTTCAGTTATGTCcAGGAAAAAATGAATGGGAAAaCCCAACTTTTAGGTCAGCATGCGCAATAGCAAATGGAAAGTGCAGTGTCTGAGCTGACAGCTCCCGTGCCCTTAGGGACAGCGATGCAATAGCCAGACTTCATTCTCTAAACAGAC…	adiponectin-activated signaling pathway [GO:0033211]; brown fat cell differentiation [GO:0050873]; cellular response to cAMP [GO:0071320]; cellular response to drug [GO:0035690]; cellular response to epinephrine stimulus [GO:0071872]; cellular response to insulin stimulus [GO:0032869]; circadian rhythm [GO:0007623]; detection of oxidative stress [GO:0070994]; fatty acid beta-oxidation [GO:0006635…	ann.char.bf
Adiponectin	ADIPO_MOUSE	isogroup00048	18	isotig00742	2368	ATAATTCATTtACTAACACACTTATTCACCCTTGTGCTTGCATTGCTGCAAGCTGGACACACTTTCTCCCCcAGCCACTAACAaCATTCCCAgTTTGCAGAaAGCAGCAGCCCAGGTTGAGCAGGCTCTCACACAGGCTCTCCAGCAAACCACTGCTCTTCCAGTTCCTGTCCAACTCCCAAACCCATCTTTTCCCTGTAAGGCCATCTTCACAAGCTATCCCAGTAGATTATACATCTGTTCCAAAACTTCAGTTATGTCcAGGAAAAAATGAATGGGAAAaCCCAACTTTTAGGTCAGCATGCGCAATAGCAAATGGAAAGTGCAGTGTCTGAGCTGACAGCTCCCGTGCCCTTAGGGACAGCGATGCAATAGCCAGACTTCATTCTCTAAACAGAC…	adiponectin-activated signaling pathway [GO:0033211]; brown fat cell differentiation [GO:0050873]; cellular response to cAMP [GO:0071320]; cellular response to drug [GO:0035690]; cellular response to epinephrine stimulus [GO:0071872]; cellular response to insulin stimulus [GO:0032869]; circadian rhythm [GO:0007623]; detection of oxidative stress [GO:0070994]; fatty acid beta-oxidation [GO:0006635…	ann.char.bf
Adiponectin	ADIPO_MOUSE	isogroup00048	18	isotig00736	2367	ATAATTCATTtACTAACACACTTATTCACCCTTGTGCTTGCATTGCTGCAAGCTGGACACACTTTCTCCCCcAGCCACTAACAaCATTCCCAgTTTGCAGAaAGCAGCAGCCCAGGTTGAGCAGGCTCTCACACAGGCTCTCCAGCAAACCACTGCTCTTCCAGTTCCTGTCCAACTCCCAAACCCATCTTTTCCCTGTAAGGCCATCTTCACAAGCTATCCCAGTAGATTATACATCTGTTCCAAAACTTCAGTTATGTCcAGGAAAAAATGAATGGGAAAaCCCAACTTTTAGGTCAGCATGCGCAATAGCAAATGGAAAGTGCAGTGTCTGAGCTGACAGCTCCCGTGCCCTTAGGGACAGCGATGCAATAGCCAGACTTCATTCTCTAAACAGAC…	adiponectin-activated signaling pathway [GO:0033211]; brown fat cell differentiation [GO:0050873]; cellular response to cAMP [GO:0071320]; cellular response to drug [GO:0035690]; cellular response to epinephrine stimulus [GO:0071872]; cellular response to insulin stimulus [GO:0032869]; circadian rhythm [GO:0007623]; detection of oxidative stress [GO:0070994]; fatty acid beta-oxidation [GO:0006635…	ann.char.bf
Adiponectin	ADIPO_MOUSE	isogroup00048	18	isotig00745	2368	ATAATTCATTtACTAACACACTTATTCACCCTTGTGCTTGCATTGCTGCAAGCTGGACACACTTTCTCCCCcAGCCACTAACAaCATTCCCAgTTTGCAGAaAGCAGCAGCCCAGGTTGAGCAGGCTCTCACACAGGCTCTCCAGCAAACCACTGCTCTTCCAGTTCCTGTCCAACTCCCAAACCCATCTTTTCCCTGTAAGGCCATCTTCACAAGCTATCCCAGTAGATTATACATCTGTTCCAAAACTTCAGTTATGTCcAGGAAAAAATGAATGGGAAAaCCCAACTTTTAGGTCAGCATGCGCAATAGCAAATGGAAAGTGCAGTGTCTGAGCTGACAGCTCCCGTGCCCTTAGGGACAGCGATGCAATAGCCAGACTTCATTCTCTAAACAGAC…	adiponectin-activated signaling pathway [GO:0033211]; brown fat cell differentiation [GO:0050873]; cellular response to cAMP [GO:0071320]; cellular response to drug [GO:0035690]; cellular response to epinephrine stimulus [GO:0071872]; cellular response to insulin stimulus [GO:0032869]; circadian rhythm [GO:0007623]; detection of oxidative stress [GO:0070994]; fatty acid beta-oxidation [GO:0006635…	ann.char.bf
Adiponectin	ADIPO_MOUSE	isogroup00048	18	isotig00732	2378	ATAATTCATTtACTAACACACTTATTCACCCTTGTGCTTGCATTGCTGCAAGCTGGACACACTTTCTCCCCcAGCCACTAACAaCATTCCCAgTTTGCAGAaAGCAGCAGCCCAGGTTGAGCAGGCTCTCACACAGGCTCTCCAGCAAACCACTGCTCTTCCAGTTCCTGTCCAACTCCCAAACCCATCTTTTCCCTGTAAGGCCATCTTCACAAGCTATCCCAGTAGATTATACATCTGTTCCAAAACTTCAGTTATGTCcAGGAAAAAATGAATGGGAAAaCCCAACTTTTAGGTCAGCATGCGCAATAGCAAATGGAAAGTGCAGTGTCTGAGCTGACAGCTCCCGTGCCCTTAGGGACAGCGATGCAATAGCCAGACTTCATTCTCTAAACAGAC…	adiponectin-activated signaling pathway [GO:0033211]; brown fat cell differentiation [GO:0050873]; cellular response to cAMP [GO:0071320]; cellular response to drug [GO:0035690]; cellular response to epinephrine stimulus [GO:0071872]; cellular response to insulin stimulus [GO:0032869]; circadian rhythm [GO:0007623]; detection of oxidative stress [GO:0070994]; fatty acid beta-oxidation [GO:0006635…	ann.char.bf
Adiponectin	ADIPO_MOUSE	isogroup00048	18	isotig00739	2367	ATAATTCATTtACTAACACACTTATTCACCCTTGTGCTTGCATTGCTGCAAGCTGGACACACTTTCTCCCCcAGCCACTAACAaCATTCCCAgTTTGCAGAaAGCAGCAGCCCAGGTTGAGCAGGCTCTCACACAGGCTCTCCAGCAAACCACTGCTCTTCCAGTTCCTGTCCAACTCCCAAACCCATCTTTTCCCTGTAAGGCCATCTTCACAAGCTATCCCAGTAGATTATACATCTGTTCCAAAACTTCAGTTATGTCcAGGAAAAAATGAATGGGAAAaCCCAACTTTTAGGTCAGCATGCGCAATAGCAAATGGAAAGTGCAGTGTCTGAGCTGACAGCTCCCGTGCCCTTAGGGACAGCGATGCAATAGCCAGACTTCATTCTCTAAACAGAC…	adiponectin-activated signaling pathway [GO:0033211]; brown fat cell differentiation [GO:0050873]; cellular response to cAMP [GO:0071320]; cellular response to drug [GO:0035690]; cellular response to epinephrine stimulus [GO:0071872]; cellular response to insulin stimulus [GO:0032869]; circadian rhythm [GO:0007623]; detection of oxidative stress [GO:0070994]; fatty acid beta-oxidation [GO:0006635…	ann.char.bf
Adiponectin	ADIPO_MOUSE	isogroup00048	18	isotig00735	2367	ATAATTCATTtACTAACACACTTATTCACCCTTGTGCTTGCATTGCTGCAAGCTGGACACACTTTCTCCCCcAGCCACTAACAaCATTCCCAgTTTGCAGAaAGCAGCAGCCCAGGTTGAGCAGGCTCTCACACAGGCTCTCCAGCAAACCACTGCTCTTCCAGTTCCTGTCCAACTCCCAAACCCATCTTTTCCCTGTAAGGCCATCTTCACAAGCTATCCCAGTAGATTATACATCTGTTCCAAAACTTCAGTTATGTCcAGGAAAAAATGAATGGGAAAaCCCAACTTTTAGGTCAGCATGCGCAATAGCAAATGGAAAGTGCAGTGTCTGAGCTGACAGCTCCCGTGCCCTTAGGGACAGCGATGCAATAGCCAGACTTCATTCTCTAAACAGAC…	adiponectin-activated signaling pathway [GO:0033211]; brown fat cell differentiation [GO:0050873]; cellular response to cAMP [GO:0071320]; cellular response to drug [GO:0035690]; cellular response to epinephrine stimulus [GO:0071872]; cellular response to insulin stimulus [GO:0032869]; circadian rhythm [GO:0007623]; detection of oxidative stress [GO:0070994]; fatty acid beta-oxidation [GO:0006635…	ann.char.bf
Adiponectin	ADIPO_MOUSE	isogroup00048	18	isotig00734	2378	ATAATTCATTtACTAACACACTTATTCACCCTTGTGCTTGCATTGCTGCAAGCTGGACACACTTTCTCCCCcAGCCACTAACAaCATTCCCAgTTTGCAGAaAGCAGCAGCCCAGGTTGAGCAGGCTCTCACACAGGCTCTCCAGCAAACCACTGCTCTTCCAGTTCCTGTCCAACTCCCAAACCCATCTTTTCCCTGTAAGGCCATCTTCACAAGCTATCCCAGTAGATTATACATCTGTTCCAAAACTTCAGTTATGTCcAGGAAAAAATGAATGGGAAAaCCCAACTTTTAGGTCAGCATGCGCAATAGCAAATGGAAAGTGCAGTGTCTGAGCTGACAGCTCCCGTGCCCTTAGGGACAGCGATGCAATAGCCAGACTTCATTCTCTAAACAGAC…	adiponectin-activated signaling pathway [GO:0033211]; brown fat cell differentiation [GO:0050873]; cellular response to cAMP [GO:0071320]; cellular response to drug [GO:0035690]; cellular response to epinephrine stimulus [GO:0071872]; cellular response to insulin stimulus [GO:0032869]; circadian rhythm [GO:0007623]; detection of oxidative stress [GO:0070994]; fatty acid beta-oxidation [GO:0006635…	ann.char.bf
Adiponectin	ADIPO_MOUSE	isogroup00048	18	isotig00748	2373	ATAATTCATTtACTAACACACTTATTCACCCTTGTGCTTGCATTGCTGCAAGCTGGACACACTTTCTCCCCcAGCCACTAACAaCATTCCCAgTTTGCAGAaAGCAGCAGCCCAGGTTGAGCAGGCTCTCACACAGGCTCTCCAGCAAACCACTGCTCTTCCAGTTCCTGTCCAACTCCCAAACCCATCTTTTCCCTGTAAGGCCATCTTCACAAGCTATCCCAGTAGATTATACATCTGTTCCAAAACTTCAGTTATGTCcAGGAAAAAATGAATGGGAAAaCCCAACTTTTAGGTCAGCATGCGCAATAGCAAATGGAAAGTGCAGTGTCTGAGCTGACAGCTCCCGTGCCCTTAGGGACAGCGATGCAATAGCCAGACTTCATTCTCTAAACAGAC…	adiponectin-activated signaling pathway [GO:0033211]; brown fat cell differentiation [GO:0050873]; cellular response to cAMP [GO:0071320]; cellular response to drug [GO:0035690]; cellular response to epinephrine stimulus [GO:0071872]; cellular response to insulin stimulus [GO:0032869]; circadian rhythm [GO:0007623]; detection of oxidative stress [GO:0070994]; fatty acid beta-oxidation [GO:0006635…	ann.char.bf
Adiponectin	ADIPO_MOUSE	isogroup00048	18	isotig00741	2368	ATAATTCATTtACTAACACACTTATTCACCCTTGTGCTTGCATTGCTGCAAGCTGGACACACTTTCTCCCCcAGCCACTAACAaCATTCCCAgTTTGCAGAaAGCAGCAGCCCAGGTTGAGCAGGCTCTCACACAGGCTCTCCAGCAAACCACTGCTCTTCCAGTTCCTGTCCAACTCCCAAACCCATCTTTTCCCTGTAAGGCCATCTTCACAAGCTATCCCAGTAGATTATACATCTGTTCCAAAACTTCAGTTATGTCcAGGAAAAAATGAATGGGAAAaCCCAACTTTTAGGTCAGCATGCGCAATAGCAAATGGAAAGTGCAGTGTCTGAGCTGACAGCTCCCGTGCCCTTAGGGACAGCGATGCAATAGCCAGACTTCATTCTCTAAACAGAC…	adiponectin-activated signaling pathway [GO:0033211]; brown fat cell differentiation [GO:0050873]; cellular response to cAMP [GO:0071320]; cellular response to drug [GO:0035690]; cellular response to epinephrine stimulus [GO:0071872]; cellular response to insulin stimulus [GO:0032869]; circadian rhythm [GO:0007623]; detection of oxidative stress [GO:0070994]; fatty acid beta-oxidation [GO:0006635…	ann.char.bf
Adenosine kinase	ADK_HUMAN	isogroup01333	2	isotig04626	2158	GAGGGGAGCGGAGCGCGCCGCACGCCGCCCAGCGCGAAGATGGCAGCGGGGGAGCCGCAAGCCAAGAAGCTCAAGCTGGAGCAGAAGCAGCTGAGTGAAAATGTCCTGTTTGGAATGGGAAATCCTCTGCTTGATATCTGTGCAGTTGTGGACAAGGACTTCCTTGACAAGTATGGGCTGAAGCCAAATGACCAAATTTTGGCAGAGGAGAAGCACAAAGAACTATTTGAAGAACTTGTGAAAAAGTTCAAAGTAGAATATCATGCTGGTGGTTCCACTCAAAATTCCGTTAAAGTGGCCCAGTGGATGATTCAGAGACCTCACAAAGCTGCAACTTTCTTCGGGTGCATTGGCAAAGATAAATTTGGAGAGATCTTGAAGAAGAAGGCTGAGGAAGCT…	adenosine salvage [GO:0006169]; AMP salvage [GO:0044209]; dATP biosynthetic process [GO:0006175]; purine-containing compound salvage [GO:0043101]; ribonucleoside monophosphate biosynthetic process [GO:0009156]	ann.char.bf
Adenosine kinase	ADK_HUMAN	isogroup01333	2	isotig04625	2230	GAGGGGAGCGGAGCGCGCCGCACGCCGCCCAGCGCGAAGATGGCAGCGGGGGAGCCGCAAGCCAAGAAGCTCAAGCTGGAGCAGAAGCAGCTGAGTGAAAATGTCCTGTTTGGAATGGGAAATCCTCTGCTTGATATCTGTGCAGTTGTGGACAAGGACTTCCTTGACAAGTATGGGCTGAAGCCAAATGACCAAATTTTGGCAGAGGAGAAGCACAAAGAACTATTTGAAGAACTTGTGAAAAAGTTCAAAGTAGAATATCATGCTGGTGGTTCCACTCAAAATTCCGTTAAAGTGGCCCAGTGGATGATTCAGAGACCTCACAAAGCTGCAACTTTCTTCGGGTGCATTGGCAAAGATAAATTTGGAGAGATCTTGAAGAAGAAGGCTGAGGAAGCT…	adenosine salvage [GO:0006169]; AMP salvage [GO:0044209]; dATP biosynthetic process [GO:0006175]; purine-containing compound salvage [GO:0043101]; ribonucleoside monophosphate biosynthetic process [GO:0009156]	ann.char.bf
ADM	ADML_BOVIN	isogroup02274	2	isotig06508	540	GGCAGTGATTACTTCACACACATACACACACAAAGgaGGAGTTCTCGCTCCTCAGGAAACCCTGCAAGCTCGGATCGCTACTACAAAAACATTTGCCTCAGTGGATTATCCTCACTGTCAgcaGGAGCCCAGcAGAATGAAACTAGTTCACGTAGCCCTGCTCTATCTCGgCTCTGTGACCTtCTTcGGGGTGGATGCTGCAAGGGTGGACGTAGCGACAGAGTTCAAAAGAAAaTGGACGAAATGGGCACTAAGCCGAGCCAAGCGGGACGTGAAGCCTGCGGGCGTGCTCCGAGGGCTGGGGGCAGCCGCcGACGTGCTGCCTCTCATACGCACCCAGGACGTGAAGGAGGATTCCCGAGTCTCGCCTCCCAGCACCCGGGAGGATGCTCACATCCG…	branching involved in labyrinthine layer morphogenesis [GO:0060670]; cAMP biosynthetic process [GO:0006171]; developmental growth [GO:0048589]; G-protein coupled receptor internalization [GO:0002031]; heart development [GO:0007507]; negative regulation of vascular permeability [GO:0043116]; negative regulation of vasoconstriction [GO:0045906]; neural tube closure [GO:0001843]; positive regulation…	ann.char.bf
Activity-dependent neuroprotector homeobox protein	ADNP_HUMAN	isogroup07741	1	isotig12130	1448	AGGCAGGGACTGGAgCCCTGGGAGCTGTGCTTAGACAGGAGGGGAGAGAgcaGGATATGAGCCTTCCTGTGTGCCCTGGGCTCCCCCaGGGgCTgTGACAGAGCCCTGAGGGgTGTTCTGCAAGGAGAATTGCCTGTGGAGGATTGTGCTTGAAACTTGTCCAATGAGTCTGAGACGCCCAAGCACCATTCATTTTGGAGGTCCAGCAGCAGCTCATGATGCCCCGTAAAGCTTTTCTTTCCCAGAAAGAAAAGCAGGCTCGTGCCAGGGAAAGGGATATGTTAAAAAAGAGGAGGAGGCGACAAGACTATCTCAAAAGAAGCGTGGAGCCGCAGAAAAATACAGAAACAATCAAATGGCACAGGGATGATGAGAAGAGGAGAGAAAATGAGCAAGTTA…	activation of protein kinase activity [GO:0032147]; cellular response to extracellular stimulus [GO:0031668]; estrous cycle [GO:0044849]; negative regulation of gene expression [GO:0010629]; negative regulation of neuron apoptotic process [GO:0043524]; negative regulation of protein binding [GO:0032091]; negative regulation of synaptic transmission [GO:0050805]; nitric oxide homeostasis [GO:00334…	ann.char.bf
Activity-dependent neuroprotector homeobox protein	ADNP_HUMAN	isogroup05243	1	isotig09632	2100	ttaaactCTGcAGGAGTCaatatGATGTcAAACGTTCACCTACAGCAGAaCAaTtACGGGgTtAAaTcGGTGCCCCCcaagTtacGTaGgTcAGCCAGGGggAggCTCAGCCTCAGTGGCAATGCACCTGTTTCTCTTTCCCAACAATCACAGAGCATGAAACAGTTTTCGGCGAGCGGCAATGGCAGGCCTTACACTCTGGgAGGGgAGCAGAGGTCCCAGGCCTCAGGCAGGTACTCTCTGCAGTCTGCCAACTCCTCGCTGTCGGCGGCGCAGCTCAAGCAGGCGTCGCTGTCGCAGTCCCAGGCAGCATCCAGAGCTCTGGGTCAGTCTGGCTCCAAATCCCCcGTGGCTGCTACAGGGCCTTCTGCTGTCAACACCTCGTCCACGCAGAAGTGG…	activation of protein kinase activity [GO:0032147]; cellular response to extracellular stimulus [GO:0031668]; estrous cycle [GO:0044849]; negative regulation of gene expression [GO:0010629]; negative regulation of neuron apoptotic process [GO:0043524]; negative regulation of protein binding [GO:0032091]; negative regulation of synaptic transmission [GO:0050805]; nitric oxide homeostasis [GO:00334…	ann.char.bf
ADNP homeobox protein 2	ADNP2_MOUSE	isogroup03660	1	isotig08049	2978	TTTGCtGGTAGAGAAACCTATGAAAAGCATTTGAAAGAGAGGCATCATATAATGCCAACTGTGCATACGATTTTAAAGTCTCCTGCTTtCAAGTGCATCCACTGTTGTGGTGTGTACACTGGAAATATGACTCTGACAGCTATCGCTGTACACTTGCTCCGTTGTAGAAGTGCTCCCAAAGACACCAACTCGAGCCTGAAGATGGAGCTTGAGCGTACTGAGAGGAAAGAGCTGCTCTTTGTGAATGGTGAGAAGCATCTTTCTGTGGTACTGAAAAGAAAGCAATCAGATCCCTGCATTGTTGCAGAAGACCAAAGGAATAAGGAACAGCAGCCTCTGAGCTTAAGTACTGGCATAGCTCTGTCTCCAGACAATGAAGTGAAATCAGGGGTAGTGCCT…	cellular response to oxidative stress [GO:0034599]; cellular response to retinoic acid [GO:0071300]; negative regulation of cell death [GO:0060548]; neuron differentiation [GO:0030182]; positive regulation of cell growth [GO:0030307]; regulation of transcription, DNA-templated [GO:0006355]; transcription, DNA-templated [GO:0006351]	ann.char.bf
[Protein ADP-ribosylarginine] hydrolase	ADPRH_BOVIN	isogroup15972	1	isotig20361	549	ACGTATGGTGTAATGATTTtCACTGCGCAACCCGGACGTGAATGGATGACATAATTtCTACCGCACATCcTGGCCAGAATAAAGTAACGCCGCGATTTTCtAACACTGAAAaGATGTTGCcAGAGAGTTgccGTTTTTCCCGCAGTTTCAGCAGCAGTTCTGTGgTTTtATAAGGGGgCGAGCAAAGGGCAAAGaTTCCTGGCAAAGGCTGgAGGCTCTGCTCAGGCTGCAGCAAGGAGGGgAAATaCAACCcAAAGTATCTTCTACATTGAAGTAGTCGGAGGCAAAATGCATCCTAAGGAGGTGGAAAACTACGTGGCATCCATGGTGCTGAGTGCACTCGGTGACACGCTGGGATATAACAACGGGAAATgggAGTTCCAGCTGAGTGGCCCAGTC…	cellular protein modification process [GO:0006464]; protein de-ADP-ribosylation [GO:0051725]	ann.char.bf
Manganese-dependent ADP-ribose/CDP-alcohol diphosphatase	ADPRM_RAT	isogroup13220	1	isotig17609	776	AGGgCTCAAAGAACCTCATTTTGtAGCATttAATGGAGGATTTAGCCAAGCCCAGCTGGACTGGTTCAATGAAGTCCTCAAGTTCTCTGATGAAAACCAAGAAAAAGTTATAGTTATGGCCCACGTaCCCCTTCATCCCTCtGCTTCGAACGGGGTTTGCCTGGCCTGGAATTACGAGGCCGCCCTGTCGGTGATCCACGCGCACCGCTGCGTGGTGTGCGTCCTGGCAGGGCACCTGCACGACGGCGCCTACTGCCTGGACCGGCACGGAGTGCATCACCTCACCCTGGAGGGCGTGATCGAGACCCCGCCGGACAGCAACGCCTTCGGCACCGTCTACGTCTATGAAGATAAAATGGTACTCAAGGGAAGGGGCAGGATTCCTGACAGAGTTATGCA…		ann.char
Adiponectin receptor protein 1	ADR1_HUMAN	isogroup09262	1	isotig13651	1208	GTGGTGTTtGGAATGTtCTTCCTGGGAGCAGTGCTGTGCCTCAGCTTCTCCTGGCTTTTCCACACTGTCTACTGTCACTCGGAGAAGGTCTCGCGGACTTTTTCGAAGCTGGATTATTCAGGAATTGCACTGCTGATCATGGGGAGCTTCGTCCCGTGGCTCTACTACTCGTTCTACTGCTCCCCACAGCCAAGACTCATCTACCTCTCCATCGTCTGTGTCTTGGGTATCTCTGCCATCATTGTGGCACAGTGGGACCGATTTGCAACCCCcAagCACAGgCAGACCAGAGCAGgcgtgTtCctGGggctGggactgagcGGggtcgtgCccACcatgcacTtcaCcAtcgCcgaGggcTttgtgAaGgCcaCcACGgTGGGgCAGATGGgCTGgTtC…	adiponectin-activated signaling pathway [GO:0033211]; fatty acid oxidation [GO:0019395]; glucose homeostasis [GO:0042593]; hormone-mediated signaling pathway [GO:0009755]; leptin-mediated signaling pathway [GO:0033210]; negative regulation of cell growth [GO:0030308]; negative regulation of epithelial cell migration [GO:0010633]; negative regulation of epithelial to mesenchymal transition [GO:001…	ann.char.bf
Adiponectin receptor protein 2	ADR2_HUMAN	isogroup01029	2	isotig04018	3971	TTGGACTCTTCTTGCTGGGCTCTCACTcTTTCACATATTCTGGCCCcTATTCTTTTGGTAGTcTGCCCCTAGCTAGTAGCTAGTTTTGCTAGCAGATAGTCAGGCTGGCTTcTGGTGGAGGAACAGGCTTATTTATTTATTaGAGAGAaCTAGGTATGGGCTTCTTCAATTAAATGGAAAAGGTGGCCTGTAAAATAACAGAACATGGGAGAAAATTaagTTTTCTCTTCATcAGCAGTAAAAACAGCCAATAGCCTTTCTGTCCAATGGAATGCTGAAGTATTTCTTCCTCTGATGGTGCAGTTTTGAACTGGGAACAGTGACTTTAGCATGATACTTCAAGTGTAAAACCTTTtCCCCAGAGATGTTCCATCAACTGTCTTCTGTTTACTGTaCTCA…	adiponectin-activated signaling pathway [GO:0033211]; fatty acid oxidation [GO:0019395]; female pregnancy [GO:0007565]; glucose homeostasis [GO:0042593]; heart development [GO:0007507]; hormone-mediated signaling pathway [GO:0009755]; negative regulation of cell growth [GO:0030308]; positive regulation of glucose import [GO:0046326]; regulation of fatty acid biosynthetic process [GO:0042304]; res…	ann.char.bf
Adiponectin receptor protein 2	ADR2_MOUSE	isogroup01029	2	isotig04017	4235	GAAGACATGTCCATGCAGGTCAGTAAGAAGCACTAAGGCAGCTCTCCTAATGATTtGCTGCCTGAAACGTGCATATTCCTCTTTGGTTTtAAAAGCAGGGCTGCAGTGTTTGTTTTTGTACAGTTGCTCCAGGCCTTGGAGCATTTTCTTGATTCAGTTTTTAGAGATTGGAACTCAGCcTTCCTAGGAGGAGGGATAGGGGTTTGCCTGTGCCTCTGGATTGCTGCTGTCTTGGTGCCCTTTACATTCCCATGCAaGATTCTCTCTGTAGAGGGgTAAAaGAAaTGTAACCTCAGTTTTGTGCTCTAGCTCTGGATTTtAGTGCCTGCTCCAAATACTTTGGTTTCTTCATCTTCACCCAACAGTTTTGTGAATTCAGTGCCCTTGAAGCAGTAGCTA…	adiponectin-activated signaling pathway [GO:0033211]; fatty acid oxidation [GO:0019395]; female pregnancy [GO:0007565]; glucose homeostasis [GO:0042593]; heart development [GO:0007507]; hormone-mediated signaling pathway [GO:0009755]; negative regulation of cell growth [GO:0030308]; positive regulation of glucose import [GO:0046326]; response to nutrient [GO:0007584]; vascular wound healing [GO:0…	ann.char.bf
Proteasomal ubiquitin receptor ADRM1	ADRM1_CHICK	isogroup14104	1	isotig18493	700	GtCTAGACTAAgCCCCTaGAGATCCCTAGGAAGAAATCCTCATAACTGTGGAGGGTGAGTTGGGGACAATGTtAATACCAGAAGCATAAACATGCTTTTAGCAGAATAAACTGTGCTGTTAAAATAGGTGTAGGCTGAAAGTTAAGACTGCCAGGAGAAATCTCTTTGTTTCTAGTAGATTCTCTGGAGTCTTACCTCTTTATGAAGCCAAGTTGCATTTATCTTTTATGAAGATCATGAATCAGTAAACACTTGAAACTGTTTTTCCATACAGAATGTGATGCCAATTAATCTCCTGCTGTTTGAGCCGGAGTGCTGTGAAAAAAaCCTATGTGAaTATGTTGTGTTtCAGAATGTTTTTGTTTTtAGgTGAGGGTGGcTTGCAAAGCCTTcTTGGAA…	proteasome assembly [GO:0043248]; ubiquitin-dependent protein catabolic process [GO:0006511]	ann.char.bf
Proteasomal ubiquitin receptor ADRM1	ADRM1_CHICK	isogroup08506	1	isotig12895	1316	GGGGTTCCGGCGCGCGGGGCAGGAAGAGCTGAGGCGGCGGCGGAGGAGGAGGAGGAGGCTGAAGGATGTCTTCAGGTGCGTTATTTCCAAGCCTGGTGCCAGGCTCTCGTGGCTCCTCGAGCAAATACCTGGTGGAATTTCGGGCAGGGAAGATGTCCCTGAAAGGCAGCACTGTAACTCCAGACAAGAGAAAAGGCCTTGTTTACATCCAGCAAACCGATGATTCCCTCATTCACTTCTGCTGGAAGGACAGGACTTCGGGCAATGTGGAGGATGATTTGATTATTTTTCCTGATGACTGTGAGTTCAAGAGAGTCCCACAGTGCACCACAGGCCGTGTGTATGTATTGAAGTTCAAGGCAGGATCAAAACGACTCTTCTTCTGGATGCAGGAGCCGA…	proteasome assembly [GO:0043248]; ubiquitin-dependent protein catabolic process [GO:0006511]	ann.char.bf
Adseverin	ADSV_CHICK	isogroup03082	1	isotig07471	3711	CTGGAGCTGGTGCCGGTGCCGCCGAGCCTCCACGGAGACTTCTTCGTTGGGGACGCGTACCTGGTGCTGCGCACGGAGCGCCGCGGGgACGGCGTCGCCTACCGCCTGCACTACTGGCTGGGgAAAGAGTGCACCCAGGATGAGAGCACAGCTGCAGCTATCTTTGCTGTTCAAATGGATGACTATCTAGGAGGAAAGCCTGTGCAGAGTAGAGAAATTCAAGGGTATGAGTCTACTGAGTTTGTGGGTTACTTCAAAGGAGGAATTAAATACAAGGCAGGTGGTGTTGCCTCTGGATTTAATCATGTTGTTACTAATGATCTGAGTGCTCAGAGGCTGCTGCATATCAAGGGCCGGAGAGTTGTAAGAGCCACAGAAGTCCCCCTGGCTTGGACCAGC…	actin filament capping [GO:0051693]; actin filament severing [GO:0051014]; negative regulation of cell proliferation [GO:0008285]; positive regulation of actin nucleation [GO:0051127]; positive regulation of apoptotic process [GO:0043065]; positive regulation of megakaryocyte differentiation [GO:0045654]; regulation of chondrocyte differentiation [GO:0032330]; sequestering of actin monomers [GO:0…	ann.char.bf
ADP/ATP translocase 1	ADT1_RAT	isogroup06865	1	isotig11254	1630	ACATTTGTCCGGCGGGGTGGGGAAGTGTCCGCTCGTTGCCTCTCTCCGGGCGGGGCTGTCGGACCGGCTCGCGGCATGGGTGACCAAGCGCTCAGCTTCGTCAAGGACTTTCTGGCCGGCGGGATCGCCGCCGCCATCTCCAAGACGGCTGTCGctcccATCGAGAGAGTGAAGTTGCTGCTGCAGGTCCAGCATGCCAGCAAACAGATCACGGCCGATAAGCAGTACAAGGGCATCGTGGACTGCATAGTCCGCATCCCCAAGGAGCAGGGCATCGCCTCCTTCTGGAGAGGCAACTTGGCCAATGTCATCCGGTACTTCCCCACCCAGGCCCTTAACTTCGCCTTCAAGGACAAGTACAAGCAAATCTTCCTGGGCGGAGTGGACAGGCACAAGCAG…	ADP transport [GO:0015866]; aging [GO:0007568]; heart development [GO:0007507]; liver development [GO:0001889]; negative regulation of cardiac muscle cell apoptotic process [GO:0010667]; negative regulation of mitochondrial membrane permeability involved in apoptotic process [GO:1902109]; positive regulation of cell growth involved in cardiac muscle cell development [GO:0061051]; positive regulat…	ann.char.bf
ADP/ATP translocase 2	ADT2_HUMAN	isogroup12950	1	isotig17339	798	GGCGTGGACAAGCGAACCCAGTTCTGGCGGTaCTTCGCCGGTAACcTGGCaTCCGGGGGTGCCGCCGGCGCGACCTCCcTCTGCTtCGTCTACCCCCTTGACTTtGCCcGAACCcGCcTGGCAGCGGATGTGGgTAAAGCCGGGGCCGACCGGGAGTTCAGTGGGCTCGGTGACTGCCTGGTCAAAATCTTCCGCTCAGATGGCATTAGGGGCCTGTACCAGGGCTTCAGTGTCTCTGTCCAGGGCATCATCATCTACAGAGCCGCCTACTTTGGCATCTACGACACcGCGAAGGGCATGCTTCCAGACCCAAAGAACACCCACATTGTTGTCAGCTGGATGATTGCTCAGACCGTCACTGCTGTcGCTGGTTTGGCCTCCTACCCTTTTGATACAGTT…	chromosome segregation [GO:0007059]; negative regulation of mitochondrial outer membrane permeabilization involved in apoptotic signaling pathway [GO:1901029]; positive regulation of cell proliferation [GO:0008284]; regulation of insulin secretion [GO:0050796]; transport [GO:0006810]; viral process [GO:0016032]	ann.char.bf
ADP/ATP translocase 3	ADT3_BOVIN	isogroup00285	4	isotig02089	3905	CTTTtCGGCTTGAGCGGCAGCAGCgTTTCCCTCCCGGCGGCTCCGGCGCGgCGCGAACATGGCGGACCAGGCCATCTCCTTCCTCAAGGACTTTCTGGCGGGCGGCGTCGCCGCTGCCATCAGCAAGACCGCGGTGGCCCCcATCGAGCGGgTCAAGCTCTTGCTTCAGGTGCAACATGCGAGCAAACAGATTGCTGCTGACAAGCAGTACAAGGGTATCATCGATTGTGTAGTGCGTATTCCAAGGGAACAAGGAGTGCTGTCCTTCTGGAGAGGAAATCTGGCAAATGTCATCAGATACTTCCCAACTCAAGCTCTTAATTTTGCCTTCAAGGATAAGTATAAGCAGGTGTTTTTGGGAGGTGTAGACAAGCACACTCAGTTCTGGAGGTATTTTGC…	apoptotic process [GO:0006915]; regulation of mitochondrial membrane permeability [GO:0046902]	ann.char.bf
ADP/ATP translocase 3	ADT3_BOVIN	isogroup00285	4	isotig02088	3905	CTTTtCGGCTTGAGCGGCAGCAGCgTTTCCCTCCCGGCGGCTCCGGCGCGgCGCGAACATGGCGGACCAGGCCATCTCCTTCCTCAAGGACTTTCTGGCGGGCGGCGTCGCCGCTGCCATCAGCAAGACCGCGGTGGCCCCcATCGAGCGGgTCAAGCTCTTGCTTCAGGTGCAACATGCGAGCAAACAGATTGCTGCTGACAAGCAGTACAAGGGTATCATCGATTGTGTAGTGCGTATTCCAAGGGAACAAGGAGTGCTGTCCTTCTGGAGAGGAAATCTGGCAAATGTCATCAGATACTTCCCAACTCAAGCTCTTAATTTTGCCTTCAAGGATAAGTATAAGCAGGTGTTTTTGGGAGGTGTAGACAAGCACACTCAGTTCTGGAGGTATTTTGC…	apoptotic process [GO:0006915]; regulation of mitochondrial membrane permeability [GO:0046902]	ann.char.bf
ADP/ATP translocase 3	ADT3_BOVIN	isogroup00285	4	isotig02091	3093	CTTTtCGGCTTGAGCGGCAGCAGCgTTTCCCTCCCGGCGGCTCCGGCGCGgCGCGAACATGGCGGACCAGGCCATCTCCTTCCTCAAGGACTTTCTGGCGGGCGGCGTCGCCGCTGCCATCAGCAAGACCGCGGTGGCCCCcATCGAGCGGgTCAAGCTCTTGCTTCAGGTGCAACATGCGAGCAAACAGATTGCTGCTGACAAGCAGTACAAGGGTATCATCGATTGTGTAGTGCGTATTCCAAGGGAACAAGGAGTGCTGTCCTTCTGGAGAGGAAATCTGGCAAATGTCATCAGATACTTCCCAACTCAAGCTCTTAATTTTGCCTTCAAGGATAAGTATAAGCAGGTGTTTTTGGGAGGTGTAGACAAGCACACTCAGTTCTGGAGGTATTTTGC…	apoptotic process [GO:0006915]; regulation of mitochondrial membrane permeability [GO:0046902]	ann.char.bf
ADP/ATP translocase 3	ADT3_BOVIN	isogroup00285	4	isotig02090	3093	CTTTtCGGCTTGAGCGGCAGCAGCgTTTCCCTCCCGGCGGCTCCGGCGCGgCGCGAACATGGCGGACCAGGCCATCTCCTTCCTCAAGGACTTTCTGGCGGGCGGCGTCGCCGCTGCCATCAGCAAGACCGCGGTGGCCCCcATCGAGCGGgTCAAGCTCTTGCTTCAGGTGCAACATGCGAGCAAACAGATTGCTGCTGACAAGCAGTACAAGGGTATCATCGATTGTGTAGTGCGTATTCCAAGGGAACAAGGAGTGCTGTCCTTCTGGAGAGGAAATCTGGCAAATGTCATCAGATACTTCCCAACTCAAGCTCTTAATTTTGCCTTCAAGGATAAGTATAAGCAGGTGTTTTTGGGAGGTGTAGACAAGCACACTCAGTTCTGGAGGTATTTTGC…	apoptotic process [GO:0006915]; regulation of mitochondrial membrane permeability [GO:0046902]	ann.char.bf
Androgen-dependent TFPI-regulating protein	ADTRP_HUMAN	isogroup03381	1	isotig07770	3260	GAGCAAGGCATTTAAATCCAGGGAATAAGCCTATTCTTCTCATCCCCccccaCCCCCcAGCCTATCTGCACaGTGAAAAGAGAAACAAATAGAAGCAAAGTTCGCAGCCTGGTGGTTTTTCCTTTTGACAAGAGCAAAGTGGCATCGTGTCCTGAGACTGCTCTGAAGTAAAGCCTCCTGCTGTGCCTTACCCCGAGCACCTTAAGAGAAAAGCTGCTTTGGGAGCAGTTGTCTGCTGCTCTTGGCTGAAGCATGGAAATCTCTACTCTCGCCACGTACCACTGCCTTGCTTTTGTCTGGTATTTTTTCGTTGCCTATTCCATCACACACATAAAAACAGAGGAGCGGCCATCTGAAGTGTTCCTTTACGGTGGGCAGTGGAAATATTTGACAGTCCTC…		ann.char
Adrenodoxin, mitochondrial	ADX_CHICK	isogroup00168	4	isotig01592	3494	TGTCGGGAGGGCAGCACGGCCGTTCAGCCTCTCTGCccGGGCGGTGCTCAGCTCAGAAGATAAAaTAACTGTTCATTTCATAAACCGTGATGGTGTCAAACTAACAGCcAAGGGAAAACCTGGGGATTCACTGCTGGATGTTGTTGTTGACAATAATCTAGACATAGATGGTTTTGGTGCATGTGAAGGAACGCTAGCCTGTTCAACTTGTCATTTAATATTTGAAGACCAtATATTTGAGAAACTAGATGCAATTACTGATGAAGAGATGGACATGCTGGACCTGGCATATGGCCTCACAGAAACATCACGTTTAGGCTGCCAAATCTGCTTGAAGAAATCAATGAATGATATGACTGTTCGAGTACCAGAAGCTGTGGCTGATGCTAGACAATCAGT…	cholesterol metabolic process [GO:0008203]; oxidation-reduction process [GO:0055114]; steroid biosynthetic process [GO:0006694]	ann.char.bf
Adrenodoxin, mitochondrial	ADX_CHICK	isogroup00168	4	isotig01591	3506	TGTCGGGAGGGCAGCACGGCCGTTCAGCCTCTCTGCccGGGCGGTGCTCAGCTCAGAAGATAAAaTAACTGTTCATTTCATAAACCGTGATGGTGTCAAACTAACAGCcAAGGGAAAACCTGGGGATTCACTGCTGGATGTTGTTGTTGACAATAATCTAGACATAGATGGTTTTGGTGCATGTGAAGGAACGCTAGCCTGTTCAACTTGTCATTTAATATTTGAAGACCAtATATTTGAGAAACTAGATGCAATTACTGATGAAGAGATGGACATGCTGGACCTGGCATATGGCCTCACAGAAACATCACGTTTAGGCTGCCAAATCTGCTTGAAGAAATCAATGAATGATATGACTGTTCGAGTACCAGAAGCTGTGGCTGATGCTAGACAATCAGT…	cholesterol metabolic process [GO:0008203]; oxidation-reduction process [GO:0055114]; steroid biosynthetic process [GO:0006694]	ann.char.bf
Adrenodoxin, mitochondrial	ADX_CHICK	isogroup00168	4	isotig01593	3492	TGTCGGGAGGGCAGCACGGCCGTTCAGCCTCTCTGCccGGGCGGTGCTCAGCTCAGAAGATAAAaTAACTGTTCATTTCATAAACCGTGATGGTGTCAAACTAACAGCcAAGGGAAAACCTGGGGATTCACTGCTGGATGTTGTTGTTGACAATAATCTAGACATAGATGGTTTTGGTGCATGTGAAGGAACGCTAGCCTGTTCAACTTGTCATTTAATATTTGAAGACCAtATATTTGAGAAACTAGATGCAATTACTGATGAAGAGATGGACATGCTGGACCTGGCATATGGCCTCACAGAAACATCACGTTTAGGCTGCCAAATCTGCTTGAAGAAATCAATGAATGATATGACTGTTCGAGTACCAGAAGCTGTGGCTGATGCTAGACAATCAGT…	cholesterol metabolic process [GO:0008203]; oxidation-reduction process [GO:0055114]; steroid biosynthetic process [GO:0006694]	ann.char.bf
Adrenodoxin, mitochondrial	ADX_CHICK	isogroup00168	4	isotig01594	2292	TGTCGGGAGGGCAGCACGGCCGTTCAGCCTCTCTGCccGGGCGGTGCTCAGCTCAGAAGATAAAaTAACTGTTCATTTCATAAACCGTGATGGTGTCAAACTAACAGCcAAGGGAAAACCTGGGGATTCACTGCTGGATGTTGTTGTTGACAATAATCTAGACATAGATGGTTTTGGTGCATGTGAAGGAACGCTAGCCTGTTCAACTTGTCATTTAATATTTGAAGACCAtATATTTGAGAAACTAGATGCAATTACTGATGAAGAGATGGACATGCTGGACCTGGCATATGGCCTCACAGAAACATCACGTTTAGGCTGCCAAATCTGCTTGAAGAAATCAATGAATGATATGACTGTTCGAGTACCAGAAGCTGTGGCTGATGCTAGACAATCAGT…	cholesterol metabolic process [GO:0008203]; oxidation-reduction process [GO:0055114]; steroid biosynthetic process [GO:0006694]	ann.char.bf
Adipocyte enhancer-binding protein 1	AEBP1_RAT	isogroup13841	1	isotig18230	722	GCACCAACGAGGACGATTTCTTTGATGGGGCGTGGTGTGCCGAGGACGACAGCCGGGCGCACTGGCTGGAGGTGGACACCcGCCGCGTCACCATGTTCACCGGCGTCGTCACCCAGGGCCGCGACTCCcAGATCCATGATGACTTCGTCACCAGCTTCTATGTGGGCTTCAGCAACGACAGCCAGCACTGGGTGATGTACAGCAACGGCTATGAGGAGATGATGTTTTATGGCAACGTGGACAAGGACACGCCGGTGCTGAGCGAGTTCCCTGAGCCAGTGGTGGCCCGGTATATCCGCATCTACCCCCAGCGCTGGAATGGGAGCCTCTGCCTGCGCCTCGAGGTCCTGGGGTGCCCCCTCTCTGCTGTCAGCAGCTACTACACCCAGCAGAACGAGG…	peptide metabolic process [GO:0006518]; protein processing [GO:0016485]; regulation of transcription, DNA-templated [GO:0006355]; transcription, DNA-templated [GO:0006351]	ann.char.bf
Zinc finger protein AEBP2	AEBP2_BOVIN	isogroup16316	1	isotig20705	512	GGGACAAACCTTTCAAGTGTGTCGTTGGTGGCTGCAACGCCAGCTTTGCATCTCAGGGGGgACTGGCCCgTCATGTGCCCACACACTTCAGCCAGCAGAACTCTTCTAAAGTTGCCAGCCAGCCCAAGGCCAAAGAGGAATCTCCATCTAAAGCTGGAATGAATAAAAGAAGAAAACTGAAGAACAAGAGACGGCGATCACTACCAAGACCTCATGACTTCTTTGATGCACAAACACTGGATGCCATAAGACATCGAGCCATCTGCTTTAATCTCTCAGCACATATAGAAAGTTTAGGAAAAGGCCACAGTGTTGTATTTCATAGTACTGTAATAGCTAAAAGAAAAGAAGACTCTGGCAAAATAAAaCTCTTGCTTCATTGGACACCAGAGGACATTC…	covalent chromatin modification [GO:0016569]; transcription, DNA-templated [GO:0006351]	ann.char.bf
Amino-terminal enhancer of split	AES_HUMAN	isogroup16615	1	isotig21004	473	CACCGGCCGCTCCGTGCGGGgACCGAGCCGCAACCTGACATGATGTTTCCACAAAGCCGGCACTCGGGCTCCTCTCACCTGCCTCAGCAGCTGAAGTTCACGACCTCCGACTCCTGCGACCGCATCAAGGACGAGTTCCAGCTGCTGCAGGCCCAGTACCACAGCTTGAAGTTGGAATGTGACAAACTAGCCAGCGAGAAATCGGAGATGCAGCGTCACTACGTCATGTACTATGAGATGTCCTACGGGCTGAATATTGAAATGCACAAACAGGCTGAAATTGTCAAGAGGCTAAATGGGATTTGTGCACAGGTTCTGCCCTACCTTTCACAAGAGCATCAGCAGCAAGTCCTGGGAGCCATTGAACGAGCCAAGCAGGTCACGGCGCCAGAACTGAAC…	animal organ morphogenesis [GO:0009887]; multicellular organism development [GO:0007275]; negative regulation of canonical Wnt signaling pathway [GO:0090090]; negative regulation of gene expression [GO:0010629]; negative regulation of protein binding [GO:0032091]; negative regulation of response to cytokine stimulus [GO:0060761]; negative regulation of transcription, DNA-templated [GO:0045892]; n…	ann.char.bf
Protein AF-10	AF10_HUMAN	isogroup01166	2	isotig04291	3388	TCAGCAGCTGTTTcccAATCTAAAAACTTtGACAGCTCACCTGGAGACATAAGTAATTCAAGCCTTACTTCtACAGCATACAAaCGAGCTCAAACTTCTGGAATAGAGGAAGAAaCTgTAACAGAGAAGAAACGGAAaGgAAaTAAGCAAAGTAAACATGGGCCtGgTAGACcTAAAGgAAATAAAaGTCAAGAAAGTCTTTCCcatCTTtCaGTTtCTTCTGCTTCCCCAACTTCATCTGTGGCATCTGCTGCAGGAAGTGTGACAAGCTCTGGTCTTCAAAAaTCTCCAACTTTGCTCAGGAATGGAAGTTTACAAAGTCTTAGTGTTGGTTCATCTCCAGTGGGTTCAGGTATTTTTAGCAGCAATGATGTAGCAGTATCATTTCCAAATGCAGTA…	positive regulation of transcription from RNA polymerase II promoter [GO:0045944]; transcription, DNA-templated [GO:0006351]	ann.char.bf
Protein AF-10	AF10_HUMAN	isogroup01166	2	isotig04292	2456	ATCTATGCCCTGCCCaGTTCCcTAAATATTTGCaGACAATTTTtATGTAGGCATGAAAATAGAGACTGGGAGTGAAGTAGTTGGCAAAAACAGGAGCAGCTTCATTCAATGGCAGCATCCCCTGGCCCcTTGCAAGGCTGAAGGTATTTGCTGAATACAGACATGGTGTGGGCAATATAAGTGGTTTGAATGACACAaAAGATTAGAAGGAAaCCAAGGTAAAAAAAaTGCTTAGTAACTAGGTGTTAAACTTtGgCAAGAGCTGTCTTGTAATACGAAATCTGGCCTTTCTATATACAGTATTTGAAAAGTACTTATAACTGGTAATTATTATCTGAGTTTCAAATAACATGCATGgAGTAGACATGTTACAGGCAAGATGTtGCTGTTGCTCAACGT…	positive regulation of transcription from RNA polymerase II promoter [GO:0045944]; transcription, DNA-templated [GO:0006351]	ann.char.bf
Protein AF-10	AF10_HUMAN	isogroup11354	1	isotig15743	954	CGGTGTCACTGGAGGgCGAGTTCTCCaGTAGCATGAAGGAGATGATCGGCGGCTGCTGCGTGTGCTCCGACGAGCGGGGCTGGgCcGAGAaCCCGCTCGTCTACTGCGACGGGCACGGCTGCAATGTCGCAGTGCATCAAGCTTGCTATGGAATTGTTCAAGTACCCACTGGACCATGGTTTTGCAGAAAGTGTGAATCTCAGGAAAGAGCAGCCAGAGTGAGATGTGAATTATGCCCTCATAAGGATGGTGCTTTAAAGAGAACAGATAATGGGGGTTGGGCTCATGTGGTTTGTGCTCTGTACATTCCCGAGGTGCAGTTTGCAAATGTTTCTACAATGGAGCCTATCGTGTTGCAGTCTGTTCCTCATGATCGTTATAATAAGACATGCTATATAT…	positive regulation of transcription from RNA polymerase II promoter [GO:0045944]; transcription, DNA-templated [GO:0006351]	ann.char.bf
Actin filament-associated protein 1-like 2	AF1L2_BOVIN	isogroup10438	1	isotig14827	1052	cAGAAGGATATTACGAAGAGGCTGAGCCCTATGACATCTCTGTAAATGATGGTGAAGCTGTTAGTAGTTCCTACGAGTCCTATGATGAGGAAGAGAGCAGCAAAGGCAAGTCAGCAACCcaTCAGTGGCcATCCCCAGAGGCCACcATTGAGCTGATGAAGGACGCCCGCATCTGTGCCTTCcTGTGGAGAAAGAAGTGGCTGGGACAGTGGGCAAAACAGCTGTGTGTTATCAAGGACaCcAGGTTGCTGTGCTACAAGAGcTCCaaaGACCACAACCCccaGcTTGATGtGAaTTtGcTGGgCtGCACTGTCATTCACAAGGAGAAGCAAGTGAGgAAGAAAGAGCACAAGCTGAAGATCATCCCCACGAACGCTGaTGTCATTGTGCTGGGGCTGC…	inflammatory response [GO:0006954]; positive regulation of epidermal growth factor receptor signaling pathway [GO:0045742]; positive regulation of interleukin-8 production [GO:0032757]; positive regulation of transcription, DNA-templated [GO:0045893]; regulation of interleukin-6 production [GO:0032675]; regulation of mitotic cell cycle [GO:0007346]	ann.char.bf
Actin filament-associated protein 1-like 2	AF1L2_HUMAN	isogroup14739	1	isotig19128	652	AGGAGAAGGAGGAGATCCGAGCTCAGCTCACCCAGCTGCGCAAGGAGAGGAGGGAGCTGAAGGAAATGCTGGGTGGCAGCACAGACAAGAGCCTGGAGCAGAGGCTGAAGGAGATAGATGAAGAATGCAAAAGGAAGGAAAGCCAGAGGGTGGACCTGGAGCTGAGCCTGGTGGAGGTGAAAGAGAACCTGAAGAAGGCAGAGTCTGGCCCGGTGACTCTGGGCACgGCAGTGGACACCACACACCTGGAGAACAcAGCCCCTCGGGTTCAGGCAAAAAGTGCCAGTGCAGCAAACAGCGCCGAGAACTCACCGGTCAATTCAGCAACGGCTCTAAAAAaCCGGCCTTTATCTGTTATGGTCACGGGGAAGGGAACAGTCCTACAGAAAGCTAAGGAAT…	inflammatory response [GO:0006954]; positive regulation of epidermal growth factor receptor signaling pathway [GO:0045742]; positive regulation of interleukin-8 production [GO:0032757]; positive regulation of transcription, DNA-templated [GO:0045893]; regulation of interleukin-6 production [GO:0032675]; regulation of mitotic cell cycle [GO:0007346]	ann.char.bf
Protein AF1q	AF1Q_RAT	isogroup01542	2	isotig05043	1730	CCATcACCATCATCATCATCGTCGCCATCCTCCCCccAcGAGGAAGGGCAGCTCGAGGGGCTGCATTGCAGACAAAAGGCAGCAGAGCCGCAGCTCCGGCACAAAGCACCGAGCTCCGCTCAGCGCTCCGCAGCCCCAGAATGCTGGACACCATCAGCAGCCAGTACGACTCCTTCATCTACTGGAGGATGCCGATCCCGCGGCTGGACACGGCCGAGCTGGAGGGGCTGGGGCTCGCAGACATGGCTCTCTACAAGCCCAAGGCGGGGCTGGGCAAGCTGGGCGAGCGGGGCAGCCAGGACCCCTCCCAGGAAGAGGACAGCCTGCTGCAGTTCAACAGCTTCAACTTCTGGCGAGCCCCCATCGCCAGCATCAGCTCCTTCGATTTCGAGTTCATCT…	extrinsic apoptotic signaling pathway [GO:0097191]; intrinsic apoptotic signaling pathway [GO:0097193]; positive regulation of apoptotic process [GO:0043065]; positive regulation of mitochondrial depolarization [GO:0051901]; positive regulation of release of cytochrome c from mitochondria [GO:0090200]; positive regulation of transcription, DNA-templated [GO:0045893]	ann.char.bf
Protein AF1q	AF1Q_RAT	isogroup01542	2	isotig05044	1559	CCATcACCATCATCATCATCGTCGCCATCCTCCCCccAcGAGGAAGGGCAGCTCGAGGGGCTGCATTGCAGACAAAAGGCAGCAGAGCCGCAGCTCCGGCACAAAGCACCGAGCTCCGCTCAGCGCTCCGCAGCCCCAGAATGCTGGACACCATCAGCAGCCAGTACGACTCCTTCATCTACTGGAGGATGCCGATCCCGCGGCTGGACACGGCCGAGCTGGAGGGGCTGGGGCTCGCAGACATGGCTCTCTACAAGCCCAAGGCGGGGCTGGGCAAGCTGGGCGAGCGGGGCAGCCAGGACCCCTCCCAGGAAGAGGACAGCCTGCTGCAGTTCAACAGCTTCAACTTCTGGCGAGCCCCCATCGCCAGCATCAGCTCCTTCGATTTCGAGTTCATCT…	extrinsic apoptotic signaling pathway [GO:0097191]; intrinsic apoptotic signaling pathway [GO:0097193]; positive regulation of apoptotic process [GO:0043065]; positive regulation of mitochondrial depolarization [GO:0051901]; positive regulation of release of cytochrome c from mitochondria [GO:0090200]; positive regulation of transcription, DNA-templated [GO:0045893]	ann.char.bf
Afadin	AFAD_HUMAN	isogroup00609	3	isotig03147	4192	caaGgATCTGTAGTCCcGgaGAtCAAAatGTGGTTTTCTGTTGTtGGAAGAACAGAATCCATGGgTGCTGGTCAAGACAAACTTGGAATATATGTCAAGTCTGTAGTGAAAGGAGGTGCTGCAGATGTGGATGGTCGTCTGGCCGCAGGGgATCAGTTGCTTAGTGTGGACGGTCGAAGTTTGGTGGGCCTGTCCCAGGAGAGGGCAGCAGAACTAATGACCAGGACAGGTTCTGTAGTAACACTAGAAGTAGCAAAaCAAGGAGCAATTtACCATGGTCTGGCAACCCTGCTtAATCAGCcATCCCcAATGATGCAAAGAGgTAAACCCCGACCAAAGAGTGAAGgcTTTGAGCTGTAtAAcAACTCCACGCAAAACGgATCACCTGAGAGTCCTCAG…	adherens junction organization [GO:0034332]; cell adhesion [GO:0007155]; cell-cell signaling [GO:0007267]; establishment of endothelial intestinal barrier [GO:0090557]; positive regulation of GTPase activity [GO:0043547]; regulation of protein localization [GO:0032880]; signal transduction [GO:0007165]	ann.char.bf
Afadin	AFAD_HUMAN	isogroup00609	3	isotig03146	4387	caaGgATCTGTAGTCCcGgaGAtCAAAatGTGGTTTTCTGTTGTtGGAAGAACAGAATCCATGGgTGCTGGTCAAGACAAACTTGGAATATATGTCAAGTCTGTAGTGAAAGGAGGTGCTGCAGATGTGGATGGTCGTCTGGCCGCAGGGgATCAGTTGCTTAGTGTGGACGGTCGAAGTTTGGTGGGCCTGTCCCAGGAGAGGGCAGCAGAACTAATGACCAGGACAGGTTCTGTAGTAACACTAGAAGTAGCAAAaCAAGGAGCAATTtACCATGGTCTGGCAACCCTGCTtAATCAGCcATCCCcAATGATGCAAAGAGgTAAACCCCGACCAAAGAGTGAAGgcTTTGAGCTGTAtAAcAACTCCACGCAAAACGgATCACCTGAGAGTCCTCAG…	adherens junction organization [GO:0034332]; cell adhesion [GO:0007155]; cell-cell signaling [GO:0007267]; establishment of endothelial intestinal barrier [GO:0090557]; positive regulation of GTPase activity [GO:0043547]; regulation of protein localization [GO:0032880]; signal transduction [GO:0007165]	ann.char.bf
Afadin	AFAD_HUMAN	isogroup00609	3	isotig03148	2410	caaGgATCTGTAGTCCcGgaGAtCAAAatGTGGTTTTCTGTTGTtGGAAGAACAGAATCCATGGgTGCTGGTCAAGACAAACTTGGAATATATGTCAAGTCTGTAGTGAAAGGAGGTGCTGCAGATGTGGATGGTCGTCTGGCCGCAGGGgATCAGTTGCTTAGTGTGGACGGTCGAAGTTTGGTGGGCCTGTCCCAGGAGAGGGCAGCAGAACTAATGACCAGGACAGGTTCTGTAGTAACACTAGAAGTAGCAAAaCAAGGAGCAATTtACCATGGTCTGGCAACCCTGCTtAATCAGCcATCCCcAATGATGCAAAGAGgTAAACCCCGACCAAAGAGTGAAGgcTTTGAGCTGTAtAAcAACTCCACGCAAAACGgATCACCTGAGAGTCCTCAG…	adherens junction organization [GO:0034332]; cell adhesion [GO:0007155]; cell-cell signaling [GO:0007267]; establishment of endothelial intestinal barrier [GO:0090557]; positive regulation of GTPase activity [GO:0043547]; regulation of protein localization [GO:0032880]; signal transduction [GO:0007165]	ann.char.bf
Afadin	AFAD_HUMAN	isogroup10061	1	isotig14450	1098	tcaaaggtCCAAGACACAAAGCTGGAGCTGTCCAGGAaaccACatttGATCTGGAGGGAGATATTCACAGTGGAACAGCATTACCAGCAAGCAAGAGCACCAGCAGGCTGGATGGTGACAGGACATCATCTGCATCCAGCACAGCCGAGCGAGGAATGGTGAAGCCGATGATCAGAATAGACCAGCAGGATTACCGCAGACAGGACAGCAGATCTCAGGATACCCATGgACCAGAACTTATACTGCCTGCCAGTATTGAATTCAGGgAAAGCTCTGAAGATGCCTTCTTATCTGCCATtATAAATTACACAAATAGCtCAACaGTTCATTTtAaGCTGTCACCAACATATGTTTtGTATATGACAtGTCGgTATGTATTaTCCAGCCAATAcAGACCTG…	adherens junction organization [GO:0034332]; cell adhesion [GO:0007155]; cell-cell signaling [GO:0007267]; establishment of endothelial intestinal barrier [GO:0090557]; positive regulation of GTPase activity [GO:0043547]; regulation of protein localization [GO:0032880]; signal transduction [GO:0007165]	ann.char.bf
Afadin	AFAD_HUMAN	isogroup02446	1	isotig06835	1239	GgATCTCGAGTTTCATGGAGTAATGAGATTCTATTTTCAAGACAAAGCAGCTGGAAATTTTGCAACAAAATGTATCCGTGTCTCTAGTACTGCCACAACTCAAGATGTGATAGAAACTCTTGCAGAGAAGTTTCGACCAGACATGCGAATGTTGTCATCCCCTAAATACTCACTTTATGAAGTTCATGTTAGTggaaagAAAGAAGATTAGATGTGGATGAGAAGCCTCTTGTTGTACAGTTAAACTGGAACAAAGATGATCGCGAGGGAAGGTTTGTCCTCAAGAATGAAAATGATACAGTTCCTCCAAAGAAAGCTCAGAGTAATGGGCCTGAAAAACAAGAAAAAGAGGGAGTAATTCAGAATTTCAAGCGAACTCTCTCAAAAAAAGAAAAAAAa…	adherens junction organization [GO:0034332]; cell adhesion [GO:0007155]; cell-cell signaling [GO:0007267]; establishment of endothelial intestinal barrier [GO:0090557]; positive regulation of GTPase activity [GO:0043547]; regulation of protein localization [GO:0032880]; signal transduction [GO:0007165]	ann.char.bf
Actin filament-associated protein 1	AFAP1_CHICK	isogroup09078	1	isotig13467	1232	tggctattgAACCCAAATCaGGAaCatCAAGTCCACAGTCTCCAATTTtcAAGCACcGAACTTTGGAAAAcTCTCCAATcTCCAGCTGTGATACCAGTGATACTGAATGCTCCATCCCTGTGAACAGTGCTGCAGCTCTGAAGAGACCTCCCTcaTCAAACAATTCTCCATGTAGAGGCcATGTCCTTCGAAAaGcAAAGgAATGGgAGATGAAAAaTGGGACATAAACATAGCAAAGCCACTCACTTTCCATAAAGGCCTTACCTACTACAGACCAAGACATAGGCTGCAAAGGACTCACCTGAAAGGTCACATCAAGTGATGAAACATAGGAAGTTTTGTAACTCTGTTAAGTTAATGGTAGCTTGGAGCTAATTTGCCTGTATTCCCTCTACTGTA…	peptidyl-arginine phosphorylation [GO:0018109]; peptidyl-tyrosine phosphorylation [GO:0018108]; regulation of cytoskeleton organization [GO:0051493]; regulation of signal transduction [GO:0009966]	ann.char.bf
AF4/FMR2 family member 2	AFF2_PANTR	isogroup08669	1	isotig13058	1291	GAGCAGCTcttttctcctatcccaatcGTAcaaaatgAaCTTCTGTCCCCACTGAGAGAATATGAAGAACTTAAaTCTTtGTGGgTGAAAaTAGACCTTAGTTTACTCTCTAGGGTACCTGGACAGGAAACTTTtGAGACCACGTCTGTGAAAAGTGAACCAAGAGAGGCAAATGTGAAACACAGGAGACCATCTCGAGAGTCTCCTACCccAGCAGCTGAAAAaCCCTCCACAAAAACCAAAAGGAAaCACAAgcaGACAGAAAGCCTGGATACTTTTGTTGAAAGCAAGAAGCAGCGCCTGGAGGACCCTCCAGCTTCCTGTCTGCTCCCACCTTGTATCTCTCCAATACCGAACCACAGAATAACCAGCACTAAAGAGAGCAGCAGTAGCTCAGTG…	mRNA processing [GO:0006397]; regulation of RNA splicing [GO:0043484]; RNA splicing [GO:0008380]	ann.char.bf
AF4/FMR2 family member 4	AFF4_HUMAN	isogroup02925	1	isotig07314	3983	AGCTGAAAATCCCTTCTCAGCCACTGGATGCATCAGCCTCTGGTGAGGTGAGCTGTGTGGATGAAATCCTCAAAGAGATGACCCACTCCTGGCCTCCTCCACTGACTGCCATCCACAccccctgCAAAACTGAACCCTCCAAATTCCCCTTTCCAACAAAGGAGtCTCAGCAGTCCAGTTTtGGCACTGGAGAACAGAAACGATACAATCCCTCATCCAAAACGTCCAATGGTCATCAATCCAAATCATGTGAATCAAACCAGACAGATATGCTGAAAGATGACTTAAAACTTAGCAGTAGTGAAGACAGCGATGGAGAGCAGGACTGTGATAAGACAGTGCCAAGGAGCACACCTGGAAGTAAtTCTGAGCCTTCCCAGCACAACAGTGAAGGAGCAG…	spermatid development [GO:0007286]; transcription elongation from RNA polymerase II promoter [GO:0006368]; transcription from RNA polymerase II promoter [GO:0006366]	ann.char.bf
AFG3-like protein 2	AFG32_MOUSE	isogroup01196	2	isotig04352	2788	AAAGGATTTGAAAAGTATTTTCCCAATGGGAAGAAATCTAATGGAACTAAAAGTACaCCTGGAGAAACGAAAGAAACAAAGCAAGCTACTTCCAGACAACCCAGTGGGACTAGTAGTGGAGgAGgTGGCAGTGGTGGAAAAAAaGGTGGCAAGAAaGAAGACACTAACTGGTGGACCAGATTACAGAaGGGTGACATTCCATGGGATGTCAGGGAGTTTCGGATGTATGTAGTGGGAAGTTCTTTTTTCTGGACAATGGTAGTGTACTACTTCTTCTTCAGGGTCCCTGGGAGAGAAATCACCTGGAAAGACTTTGTCAATAACTACCTTTCTAAAGGATTGGTGGACAGACTTGAAGTGGTGAACAAGCGCTTTGTTAGAGTCATCTTTGTTCCTGGA…	axonogenesis [GO:0007409]; cristae formation [GO:0042407]; mitochondrial calcium ion homeostasis [GO:0051560]; mitochondrial calcium uptake [GO:0036444]; mitochondrial fusion [GO:0008053]; mitochondrial protein processing [GO:0034982]; mitochondrion organization [GO:0007005]; muscle fiber development [GO:0048747]; myelination [GO:0042552]; nerve development [GO:0021675]; neuromuscular junction de…	ann.char.bf
AFG3-like protein 2	AFG32_MOUSE	isogroup01196	2	isotig04351	2796	AAAGGATTTGAAAAGTATTTTCCCAATGGGAAGAAATCTAATGGAACTAAAAGTACaCCTGGAGAAACGAAAGAAACAAAGCAAGCTACTTCCAGACAACCCAGTGGGACTAGTAGTGGAGgAGgTGGCAGTGGTGGAAAAAAaGGTGGCAAGAAaGAAGACACTAACTGGTGGACCAGATTACAGAaGGGTGACATTCCATGGGATGTCAGGGAGTTTCGGATGTATGTAGTGGGAAGTTCTTTTTTCTGGACAATGGTAGTGTACTACTTCTTCTTCAGGGTCCCTGGGAGAGAAATCACCTGGAAAGACTTTGTCAATAACTACCTTTCTAAAGGATTGGTGGACAGACTTGAAGTGGTGAACAAGCGCTTTGTTAGAGTCATCTTTGTTCCTGGA…	axonogenesis [GO:0007409]; cristae formation [GO:0042407]; mitochondrial calcium ion homeostasis [GO:0051560]; mitochondrial calcium uptake [GO:0036444]; mitochondrial fusion [GO:0008053]; mitochondrial protein processing [GO:0034982]; mitochondrion organization [GO:0007005]; muscle fiber development [GO:0048747]; myelination [GO:0042552]; nerve development [GO:0021675]; neuromuscular junction de…	ann.char.bf
Aftiphilin	AFTIN_HUMAN	isogroup00612	3	isotig03156	3557	CAAACAATGGAACCaGACATTATTCGAATGTACTCCTCATcccctCCaCCaCTtGACAATGGAGCTGATGATGATGATGAAGATGAGTTtGGAGGATTTtCTGGTGTGAGCACTGCTGGCGTAGCTTTtGCTGATTTTGATACACCGGACTACAGTCATCCAAaGGAAGAGTTTATACCcACgAatCATTtCATCCcACTCCATGATTATTCTGACAATGTAGCTAGCATTGCAACTTTCACATCTGTTAAAAATGGTAAAGATAAAGACTGCATTGCAGAGCTTCCTACTCATGCTAAGGAGCTTTCTGATATGTCAGCTACTAGTACTATCAAAGAAAAATCTAAGTTTAGAACTTCAGGTACCGCTTTAGAAGATGTAAACAGAAGGGGGgAACAA…	protein transport [GO:0015031]	ann.char.bf
Aftiphilin	AFTIN_HUMAN	isogroup00612	3	isotig03155	3641	CAAACAATGGAACCaGACATTATTCGAATGTACTCCTCATcccctCCaCCaCTtGACAATGGAGCTGATGATGATGATGAAGATGAGTTtGGAGGATTTtCTGGTGTGAGCACTGCTGGCGTAGCTTTtGCTGATTTTGATACACCGGACTACAGTCATCCAAaGGAAGAGTTTATACCcACgAatCATTtCATCCcACTCCATGATTATTCTGACAATGTAGCTAGCATTGCAACTTTCACATCTGTTAAAAATGGTAAAGATAAAGACTGCATTGCAGAGCTTCCTACTCATGCTAAGGAGCTTTCTGATATGTCAGCTACTAGTACTATCAAAGAAAAATCTAAGTTTAGAACTTCAGGTACCGCTTTAGAAGATGTAAACAGAAGGGGGgAACAA…	protein transport [GO:0015031]	ann.char.bf
Aftiphilin	AFTIN_HUMAN	isogroup00612	3	isotig03157	2612	CAAACAATGGAACCaGACATTATTCGAATGTACTCCTCATcccctCCaCCaCTtGACAATGGAGCTGATGATGATGATGAAGATGAGTTtGGAGGATTTtCTGGTGTGAGCACTGCTGGCGTAGCTTTtGCTGATTTTGATACACCGGACTACAGTCATCCAAaGGAAGAGTTTATACCcACgAatCATTtCATCCcACTCCATGATTATTCTGACAATGTAGCTAGCATTGCAACTTTCACATCTGTTAAAAATGGTAAAGATAAAGACTGCATTGCAGAGCTTCCTACTCATGCTAAGGAGCTTTCTGATATGTCAGCTACTAGTACTATCAAAGAAAAATCTAAGTTTAGAACTTCAGGTACCGCTTTAGAAGATGTAAACAGAAGGGGGgAACAA…	protein transport [GO:0015031]	ann.char.bf
Putative Dol-P-Glc:Glc(2)Man(9)GlcNAc(2)-PP-Dol alpha-1,2-glucosyltransferase	AG10B_RAT	isogroup06446	1	isotig10835	1719	TGCAGTGGGACCCCATgATCACCACGCTGCCCGGCCTGTACCTGCTCTCGGTGGGGCTGGTGAAACCCGCGGCCTGGCTGCTCGGCTGGACCGGACGCGTCGTGTGCTCGGTGGGAATGCTCAGGTTTATCAATCTCCTCTTCAGTGCCGGCAACTTCTATTTGCTGTATTTGCTTCTGTTCAAGATCCATCAGAAGAATAAGgCTGTGTCTGGTTTCCAGAGAATATTGTCTGCATTAACTCTTGCAGCGTTTCCCACCCTTTATTTTTTtACGTTCCTTTATTATACGGATCCAGGATCCGTATTTTTTACTCTCTTTTCCTATTTAATGTGCCTTTATGGTAACCATAAAACTTCTGCTCTCCTTGGATTTTGTGGCTTCATGTTTCGTCAGACAA…	auditory receptor cell development [GO:0060117]; dolichol-linked oligosaccharide biosynthetic process [GO:0006488]; sensory perception of sound [GO:0007605]	ann.char.bf
Arf-GAP with GTPase, ANK repeat and PH domain-containing protein 1	AGAP1_HUMAN	isogroup07167	1	isotig11556	1562	TAGTGGTTGATGGACAAAGCTACCTGCTGCTGATCAGAGATGAAGGAGGCCCTccAgaggCACagtttGccatgtgggtggATGctGTTAtCtttgTgttcagcTTGGAGGATGAAGTCAGCTTCCAGACTGTTTACCACTACTACAGCcGCATGGCcAGCTACCGCAACACCaGCGAGATccccATGGTGCTGGTGGGCACCCAGGATGCCATCAGCTCCACCAACCCCcGTGTCATtGACGATGCcAGAGCCAGGAAGTTGtCCAaTGACCTCAaGAGATGCACGTACTACGAGACCTGTGCCACCTACGGCCTCAACGTGGAGAGAGTCTTCCACGACGTTGCCCAGAAGATCGTTTCCACCAAGAAGAAGCAGCAGCTCTCAATCGGACCCTGCA…	protein transport [GO:0015031]	ann.char.bf
Arf-GAP with GTPase, ANK repeat and PH domain-containing protein 3	AGAP3_HUMAN	isogroup09907	1	isotig14296	1116	CGATCCGCGCCGAGATCGGCCGCTTCGAGTCCGTGCACCCCAATATCTACGCCATCTACGACCTCATCGAGCGCGTGGAGGACCTGGCGCtGCAGAGCCAGATCCGCGAGCACGTCATCTCCATCGAGGACTCATTTGTGAACAGCCAGGAgTGGACCCTGAGtCGcTCgGTGCCtGAGCTGAAGgTGGGcATCGTGGGgAACCTGTCCAGTGGCAAGTCAGCGCTGGTGCACCGCTACCTGACcGGCACCTACGTGCAGGAGGAGTCTCCAGAGGGCGGCCGCTTCAAGAAGGAGATCGTGGTGGATGGGCAGAGCTACCTGCTGCTGATTCGAGACGAAGGGGgcccccccGAGCTCcAGTTTGCTGCCTGGGTCGATGCAGTGGTGTTTGTCTTCA…	signal transduction [GO:0007165]	ann.char.bf
Arf-GAP domain and FG repeat-containing protein 1	AGFG1_BOVIN	isogroup01349	2	isotig04657	2218	GCGACCAGcGGGGCCcACCTACACCGACATGACCgTggCAGCTTCGTGTGCACcTCCTGCTCCGGCATCCTGCGGGGCTtGAATCCACCCcACAGAGTGAAGTCGATTTCAATGACTACGTTCACACAACAGGAAATAGAATTTCTGCAGAAACATGGAAATGAAGTGTGCAAACAGATTTGGCTAGGCCTATTTGATGATAGATCATCAGCAATTCCAGATTTCAGGGATCCACAAAAAGTAAAGGAATTTCTACAGGAAAAATATGAAAAGAAAAGATGGTATGTTCCTCCAGAGCAAGCAAAGGTGGTGGCATCAGTCCATGCATCCATATCGGGGTCTTCTGCCAGTAGTACAAGCAGCACACCTGAGGTGAAGCCACTCAAATCTCTCTTGGGA…	acrosome assembly [GO:0001675]; intermediate filament organization [GO:0045109]; multicellular organism development [GO:0007275]; spermatid nucleus differentiation [GO:0007289]; transport [GO:0006810]	ann.char.bf
Arf-GAP domain and FG repeat-containing protein 1	AGFG1_BOVIN	isogroup01349	2	isotig04658	2098	GCGACCAGcGGGGCCcACCTACACCGACATGACCgTggCAGCTTCGTGTGCACcTCCTGCTCCGGCATCCTGCGGGGCTtGAATCCACCCcACAGAGTGAAGTCGATTTCAATGACTACGTTCACACAACAGGAAATAGAATTTCTGCAGAAACATGGAAATGAAGTGTGCAAACAGATTTGGCTAGGCCTATTTGATGATAGATCATCAGCAATTCCAGATTTCAGGGATCCACAAAAAGTAAAGGAATTTCTACAGGAAAAATATGAAAAGAAAAGATGGTATGTTCCTCCAGAGCAAGCAAAGGTGGTGGCATCAGTCCATGCATCCATATCGGGGTCTTCTGCCAGTAGTACAAGCAGCACACCTGAGGTGAAGCCACTCAAATCTCTCTTGGGA…	acrosome assembly [GO:0001675]; intermediate filament organization [GO:0045109]; multicellular organism development [GO:0007275]; spermatid nucleus differentiation [GO:0007289]; transport [GO:0006810]	ann.char.bf
Angiogenic factor with G patch and FHA domains 1	AGGF1_HUMAN	isogroup01115	2	isotig04189	3332	GCGGCGAGGCGCTCAGGAGGCAGATAGAAGAACTCACTAAAGAAATCCATAATAGAAAGGAGAAaGACACGTCTAGTGTAGAAGTACAGACAGAGGACTTTGCTGCATGGTCACAAGCAGATTATTACTACTATGAAAACTATTACAATCACACTGATACTCAAGATTGTGCATCTGAACTACCAATGCAGCACAGTCACGGGACTGAAGGCACTGAGCATAATTCCACAGAGGAATTGGAGAGAGAAGTTAATACTCCACAAGAGAAGGATAGCACCACGGCTGTTGATGGTGAAGAAGAGGAAAATTTCATCCAGAATTCACAGGAGACAGAAGAAACTTCATTAACGGAAGGCTCTTTGGCAGAGAGTTTGAGAGCTGCTGCAGAGGCTGCTGTTT…	angiogenesis [GO:0001525]; cell adhesion [GO:0007155]; positive regulation of angiogenesis [GO:0045766]; positive regulation of endothelial cell proliferation [GO:0001938]; vasculogenesis [GO:0001570]	ann.char.bf
Angiogenic factor with G patch and FHA domains 1	AGGF1_HUMAN	isogroup01115	2	isotig04190	3136	GCGGCGAGGCGCTCAGGAGGCAGATAGAAGAACTCACTAAAGAAATCCATAATAGAAAGGAGAAaGACACGTCTAGTGTAGAAGTACAGACAGAGGACTTTGCTGCATGGTCACAAGCAGATTATTACTACTATGAAAACTATTACAATCACACTGATACTCAAGATTGTGCATCTGAACTACCAATGCAGCACAGTCACGGGACTGAAGGCACTGAGCATAATTCCACAGAGGAATTGGAGAGAGAAGTTAATACTCCACAAGAGAAGGATAGCACCACGGCTGTTGATGGTGAAGAAGAGGAAAATTTCATCCAGAATTCACAGGAGACAGAAGAAACTTCATTAACGGAAGGCTCTTTGGCAGAGAGTTTGAGAGCTGCTGCAGAGGCTGCTGTTT…	angiogenesis [GO:0001525]; cell adhesion [GO:0007155]; positive regulation of angiogenesis [GO:0045766]; positive regulation of endothelial cell proliferation [GO:0001938]; vasculogenesis [GO:0001570]	ann.char.bf
Acylglycerol kinase, mitochondrial	AGK_MOUSE	isogroup01579	2	isotig05118	1183	gcggCCGGCGCGATGGCGAACGCGCTGGCAACCCTCCGGCACCACTGGAAGAAATCCACGTTCGGAGCCTGCCTGCTGGGCTGGGGCGGCCACTGGCTCTATGGGAAGCACTGTGATGACCTGGTACGAAGAGCTGCATGCCAGGAAGCCCAGGCTTTTGGCAACCAGCTGATTCATGCCACTGTGCCACTGAAGAAAGCAACAGTCTTCCTCAACCCAGCAGCTTGCAAAGGCAAAGCTGTGAACCTTTTTGAAAAGAATGCTGCACCAATTCTGCACTTATCTGGCATGGATGTAACTGTGGTTAGGACTGATTATGAGGGACAAGCAAAAAGGCTTATGGAATTAATGGAAAGCACGGATGTGATCATTATTGCAGGAGGAGATGGCACAGTCCAA…	ceramide biosynthetic process [GO:0046513]; glycerolipid metabolic process [GO:0046486]; lipid phosphorylation [GO:0046834]	ann.char.bf
Acylglycerol kinase, mitochondrial	AGK_MOUSE	isogroup01579	2	isotig05117	1980	gcggCCGGCGCGATGGCGAACGCGCTGGCAACCCTCCGGCACCACTGGAAGAAATCCACGTTCGGAGCCTGCCTGCTGGGCTGGGGCGGCCACTGGCTCTATGGGAAGCACTGTGATGACCTGGTACGAAGAGCTGCATGCCAGGAAGCCCAGGCTTTTGGCAACCAGCTGATTCATGCCACTGTGCCACTGAAGAAAGCAACAGTCTTCCTCAACCCAGCAGCTTGCAAAGGCAAAGCTGTGAACCTTTTTGAAAAGAATGCTGCACCAATTCTGCACTTATCTGGCATGGATGTAACTGTGGTTAGGACTGATTATGAGGGACAAGCAAAAAGGCTTATGGAATTAATGGAAAGCACGGATGTGATCATTATTGCAGGAGGAGATGGCACAGTCCAA…	ceramide biosynthetic process [GO:0046513]; glycerolipid metabolic process [GO:0046486]; lipid phosphorylation [GO:0046834]	ann.char.bf
Phosphoacetylglucosamine mutase	AGM1_HUMAN	isogroup01730	2	isotig05420	1028	tgaaacttgtGCttatttaataacctgtaaaaaagctattatggCAGGAGTtAATAGAGGACTACAATGAACTGTTtGTCAGAGGTAGACACCCTGAACCCAAaGTATGCCAAGGAGGATACTGGTGTGTTtAAAACATTGCATCCTGTTGGCCCAGCCCcTTCCTAGTGCTGGGGAGCAGTTAAGGCCACAGAAGACAAACTTGTCTCTGTCCCTTTCCTCTCAAGTGTGATTATAAATACTATTACTGCAAATTACTTTCTAAaTAATGTCATAAAGTATCTAATGAAGATAATATTGCAATAATAGATTATTATTTGCAAATATTCTTTTTCATtATATTGTTTCCCCCTCAAAAtGAGGTGAACTAAATCTGAAGACTAGTGACAGCCTCTGTCT…	carbohydrate metabolic process [GO:0005975]; glucosamine metabolic process [GO:0006041]; glucose 1-phosphate metabolic process [GO:0019255]; hemopoiesis [GO:0030097]; protein N-linked glycosylation [GO:0006487]; protein O-linked glycosylation [GO:0006493]; spermatogenesis [GO:0007283]; UDP-N-acetylglucosamine biosynthetic process [GO:0006048]	ann.char.bf
Phosphoacetylglucosamine mutase	AGM1_HUMAN	isogroup01730	2	isotig05419	1556	tgaaacttgtGCttatttaataacctgtaaaaaagctattatggCAGGAGTtAATAGAGGACTACAATGAACTGTTtGTCAGAGGTAGACACCCTGAACCCAAaGTATGCCAAGGAGGATACTGGTGTGTTtAAAACATTGCATCCTGTTGGCCCAGCCCcTTCCTAGTGCTGGGGAGCAGTTAAGGCCACAGAAGACAAACTTGTCTCTGTCCCTTTCCTCTCAAGTGTGATTATAAATACTATTACTGCAAATTACTTTCTAAaTAATGTCATAAAGTATCTAATGAAGATAATATTGCAATAATAGATTATTATTTGCAAATATTCTTTTTCATtATATTGTTTCCCCCTCAAAAtGAGGTGAACTAAATCTGAAGACTAGTGACAGCCTCTGTCT…	carbohydrate metabolic process [GO:0005975]; glucosamine metabolic process [GO:0006041]; glucose 1-phosphate metabolic process [GO:0019255]; hemopoiesis [GO:0030097]; protein N-linked glycosylation [GO:0006487]; protein O-linked glycosylation [GO:0006493]; spermatogenesis [GO:0007283]; UDP-N-acetylglucosamine biosynthetic process [GO:0006048]	ann.char.bf
Phosphoacetylglucosamine mutase	AGM1_HUMAN	isogroup08864	1	isotig13253	1264	CAAATgCAGAGgAGCAGgAaTtACAGAAAGTGATAACTGaGATCTGCCAAAAaGCAGAAGTGAACTTGCACAAAGATGCCTCAGTTTTTATTGGTAGAGACACCAGGCCAAGCaGCAAGAAGCTGTCCCAGTCAGTTATAGATGGTATCCAGGTTCTAGGTGGTCAGTACCATGATTATGGTCTGGTGACAACACCACAGCTCCATTACATGGTCTgCTGTCAAAACACCCAAGGgCAGTATGGGAAAGCAACACTGGAAGGTTATTATGAAAAACTGTCCAAAGCTTTTATGGAACTGATAAAACAGTCTCaCTGCTCTGGAGAGAATCAGAAGCACCTGAAGATTGACTGTGCCAATGGAATAGGAGCCCTGAAACTATCAGAAATGAAGCCcTACT…	carbohydrate metabolic process [GO:0005975]; glucosamine metabolic process [GO:0006041]; glucose 1-phosphate metabolic process [GO:0019255]; hemopoiesis [GO:0030097]; protein N-linked glycosylation [GO:0006487]; protein O-linked glycosylation [GO:0006493]; spermatogenesis [GO:0007283]; UDP-N-acetylglucosamine biosynthetic process [GO:0006048]	ann.char.bf
Protein argonaute-1	AGO1_HUMAN	isogroup02840	1	isotig07229	4171	GTGCCATACCTACGTGCGCTGCAcccgCTCcGTCTccatcccagccccagcctattaTGccaggCTggTggcattCCGGGCACGGtACcACcTTGTGGaTAAGGAGCACGACAGTGGCGAGGGCAGCCATATATCTGGACAGAGCAACGGCAGAGACCCCcAGGCcTTGGCGAAGGCTGTGCAGGTTCATCAGGACACTTTACGTACCATGTACTTTGCTTGAAAGCCTAACTTTTGTTACCTCACTCAAGAAAGCTTTCAGATTtGTAGGaGCCATACAAAAAAGGAAGCATTGGGACACCTTGGTTTTTTTTttCCAATGAGAAAtCACTGCAGGgCAGGCAGTGTCGACTCCAGGCAGGAGACCAGCACCACGGGACAAAACGATCCAaCACCTTt…	miRNA loading onto RISC involved in gene silencing by miRNA [GO:0035280]; miRNA mediated inhibition of translation [GO:0035278]; miRNA metabolic process [GO:0010586]; nuclear-transcribed mRNA catabolic process [GO:0000956]; phosphatidylinositol-mediated signaling [GO:0048015]; positive regulation of NIK/NF-kappaB signaling [GO:1901224]; positive regulation of transcription from RNA polymerase II …	ann.char.bf
Protein argonaute-2	AGO2_MOUSE	isogroup12687	1	isotig17076	824	ATAAAGTGGAGCTGGAGGTCACGCTGCCAGGAGAAGGAAAGGACAGGATATTTAAGGTGGCCATCAAGTGGATGTCCTGTGTGAGTTTGCAGGCTCTGCACGATGCTCTCTCTGGCCGGCTGCCGAGTGTCCCCTTTGAGACCATCCAGGCCCTGGATGTGGTGATGAGGCACTTGCCTTCCATGAGGTATACTCCTGTGGGGAGATCTTTCTTTACaGCATCaGAAGGGTGCTCAAATCCTTTGGGtGgTGGCAGAGAAGTTTGGTTTGGCTTCCATCAGTCAGTCAGACCTTCATTATGGAAAATGATGTTAAATATTGATGTGTCTGCAACTGCATTTTACAAAGCACAGCCAGTTATTGAGTTTGTCTGTGAAGTTCTGGACTTCAAAAGTATTG…	cell differentiation [GO:0030154]; gene silencing by RNA [GO:0031047]; miRNA loading onto RISC involved in gene silencing by miRNA [GO:0035280]; miRNA mediated inhibition of translation [GO:0035278]; miRNA metabolic process [GO:0010586]; mRNA cleavage involved in gene silencing by miRNA [GO:0035279]; mRNA cleavage involved in gene silencing by siRNA [GO:0090625]; negative regulation of translatio…	ann.char.bf
Protein argonaute-4	AGO4_CHICK	isogroup16289	1	isotig20678	513	AGATATTTGGGGATCGGCAGCcTGGCTACGATGGGAaGCGgAACATGTACACaGCACACCCcTtACCcATTGGCAGGGACAGGTGGATATGGAGGTTACACTTCCAGGAGAGGGGAAGGACCAGACATTTAAGGTTTCCATtCAATGGGTGTCAGTTGTCAGCCTTCAGATGCTGCTGGAAGCACTGGCAGGGCACTTGAATGAAGTTCCTGAAGATTCTGTACAGGCACTGGATGTAATCACACGGCACCTTCCCTCCATGAGGTACACCCCTGTGGGTCGCTCCTTTTTCTCCCcTCCTGAAGgTtATTACCACCCCcTGGgAGGGggCAGGgaGgTCTGGTTTGGCTtCcACCAGTCAGTCCGtCCTGCcATGTGGAACATGATGCTCAaCATTGA…	miRNA mediated inhibition of translation [GO:0035278]; mRNA catabolic process [GO:0006402]	ann.char.bf
Anterior gradient protein 2 homolog	AGR2_MOUSE	isogroup12320	1	isotig16709	859	GACACTGAAACCAGGAACACCTTCACATCCTGGCAGGCAACTGAGAGAGTAAACAAGGgCAGCCATGGAGAAGAGTTACCTGTCCTTGCTCCTGCTGCTCGTTGCCATCTCCTGCGCTCTGGCCAAGGATGCGGCCAAGAAGGATTCGAAGGATGCTACGGCTAAGCCAAAACTGCCTCAGACACTCTCCAGAGGCTGGGGTGACCAGCTcATCTGGACGCAGACCTACGAGGAGGCGCTTTTCCGAGCCAAGCACAGCCAGAAACCCCTCATGATTATCCACCACCTGGAAGACTGCCCACACAGCCAAGCCCTCAAGAAGGTCTTTGCTGAACACAAAGATATACAGAAACTGGCTGAAAAATTCATTCTCCTGAACCTTGTGTATGAAACCACAGA…	digestive tract morphogenesis [GO:0048546]; lung goblet cell differentiation [GO:0060480]; mucus secretion [GO:0070254]; negative regulation of cell death [GO:0060548]; positive regulation of cell-substrate adhesion [GO:0010811]; positive regulation of developmental growth [GO:0048639]; positive regulation of epidermal growth factor receptor signaling pathway [GO:0045742]; positive regulation of …	ann.char.bf
Anterior gradient protein 2 homolog	AGR2_MOUSE	isogroup11098	1	isotig15487	982	GggTTTTGTtCAtAGGTGAGTACcTCAaGcACCAAAGCTGATCTCAGCACAGAGCCCCTGCtgCACCTTGCATCCCAAATCCTCAGGCTGATTAACAGGAaTTTATtCCATGAGAAAtATAAAGGTTTGAGTTGGTTTTGTGGATCAAAACCACCcAGCTTCACAAGTCCAGCATTCCTCCCTCAACAGCTGATGCCACAGTCGCTGGAATGGGTAGCTCcTCCCATTCCTAaTAAaCCTACAAAGAAAaCACTtAaAACTGAAATGTCAGTAACCCTGTTAGAACAATCTCTTAGTCAGCGGAAGCAGACATGTCTCACAGACACATTTAGGAAGCAAGCAGGAGTGCAGAAAGATTTATATCCTTTtATTTCCTTCTGCTTGAAGGTTAACCTCGAC…	digestive tract morphogenesis [GO:0048546]; lung goblet cell differentiation [GO:0060480]; mucus secretion [GO:0070254]; negative regulation of cell death [GO:0060548]; positive regulation of cell-substrate adhesion [GO:0010811]; positive regulation of developmental growth [GO:0048639]; positive regulation of epidermal growth factor receptor signaling pathway [GO:0045742]; positive regulation of …	ann.char.bf
Alanine--glyoxylate aminotransferase 2, mitochondrial	AGT2_BOVIN	isogroup04885	1	isotig09274	2237	TCATGGCAAGGCTGCACACTCGTAACTTCGAcATCATCTGTCTCAGAGGAGGATACCATGGAGGCAGCCCTTACACCCTGGGTTTgaCATCTCTGACTCCTTATAAGCATGGTGTTGCCAATGGCTTTGGCTGTACAACTACAATGTTACCAGATGTTTTTCGTGGTCCATGGGgAGGCAGCCACTGTAGAGATTCTCCAGTGCAAACTGTTCGAAAATGCAACTGTACTGAAGGTGCATGTCATGCAAAAGACCAGTACATTGAACAGTTCAAAGATACTCTGAATACTTCAGTGCCCAAGACAGTAGCTGGATTTATTGCTGAACCAATGCAAGGTGTTAATGGAGCTGTTCAGTACCCAAGAAATTTCTTAAAGGAAGCTTATCAGCTTATAAGGG…	glyoxylate catabolic process [GO:0009436]; L-alanine catabolic process, by transamination [GO:0019481]; positive regulation of nitric oxide biosynthetic process [GO:0045429]	ann.char.bf
AT-hook DNA-binding motif-containing protein 1	AHDC1_HUMAN	isogroup15054	1	isotig19443	627	TGCCGCACGCCCCCcACCTGGCCTGCCGCGACCTCCCcATGCCTCAGCCGCACTACGACTCCCCCAGTTGCAAAAACCCCCcGTACTGGTATTCCCCCAACGCCAGCACCCGCAGCCCCTCTtACGACGGCAAGGCaGGTGCCGGCATGCTGGTGgACTTCATGGGCAGGACGGACCCCCcGTGTCTGAACCCCCACCTGAGCAGCCCTAGCGGCACCCACCCCTCCAaGGGCGAGAAGGAGCCCTTGGAGATGTCCCGGGCTCACCACCGGGGACCCTACGCTTGTCCCTTGATCAATGACTTGAACATCTCCCCCGTACCAAGAGACTCAATGTTGCAGCTGCAGGACAACTACAGGTACCCCAGTTTTGCACCCCAAGGGCACCCcGTCATGGCCC…		ann.char
Jouberin	AHI1_RAT	isogroup02444	1	isotig06833	1406	GGGgAGGCGaGGCGGCCGCAGCAGCCGCCGGGCCACGGGAGAGGACGCGGCCGACAATGGTGAaTTCTGAGGAAGAAGCAGCtGTTGTGTTGAGCCACTTCTAACTGAGGACTGAAAATGCGAGCAGTTGAAAGTGAGGCAAAGgCAAAAACCAAAGTCCGCTTTGAGGAAATCTTCAGACGCcATGCTGGCCTAGCAGACACAAAGAAGTCAAAAAAAAaGAAGTTTGgCTCTCAAGAGAGTATtGTGCTTGATACCTTTAGAAATAGTATTGATCTATCTAAGGAAAGTGTGAATGATGAAGCAATTATAAACAACACATATAATCCTGAAGAAGAGAGCCCAAGATTTACAAAAAATAAATTGAGAGAGAAAGCATCgATTGCAAAGAAAATAAAC…	cellular protein localization [GO:0034613]; central nervous system development [GO:0007417]; cilium assembly [GO:0060271]; cloaca development [GO:0035844]; embryonic brain development [GO:1990403]; heart looping [GO:0001947]; hindbrain development [GO:0030902]; Kupffer's vesicle development [GO:0070121]; left/right axis specification [GO:0070986]; morphogenesis of a polarized epithelium [GO:00017…	ann.char.bf
Neuroblast differentiation-associated protein AHNAK	AHNK_HUMAN	isogroup16364	1	isotig20753	506	TGGAAGTTCCCGACATCGACGTTGAaGgTCCGAAGGGGAAAATCAAAGGCCCCAAATTCAAAATGCCCGAAATGAACATCAAAGCTCCCAACCTCTCCATGCCCGACCTGGACCTGAACCTGAAAGGCCCCAAGGTCAAgggggtgggtggatgTCGATCTCTCTGCACCAAAAaTCGAaGGGgaCATGaGCTTGCCGGACGTCGACATCAAAGGCCCCAAGGTGGACGTTGAAGGTCCAGAGCTGGACATTGAAGGgCCCGAGGGGAAGATCAAAGGGCCCAAGTTCAaGATGCCCGAGATGcACATCAAGGCCCCcAAAATCTCCATGCCcGACGTCGACTTCGGCcTCAAAGGCCCCAAAGTCAaGGGGGACATCGATGTCTCTGTCCCCAaGATT…	protein oligomerization [GO:0051259]; regulation of RNA splicing [GO:0043484]; regulation of voltage-gated calcium channel activity [GO:1901385]	ann.char.bf
Neuroblast differentiation-associated protein AHNAK	AHNK_HUMAN	isogroup15203	1	isotig19592	614	CGAGATCGACATCAAAggCCCcaaaGTCGACATCAAAGGCCCcAAaGTCGAtATCGAGGGCCCGGCGGTCGAtGTGGATGGTCTGGAGGGgAAAGTGAaGCTGCCCAAAATGAAAATCCCcAAaTTtGgCTTtAAAGGGGAAGgTCCCGACGTGGACGtGAACTTGCCGAAGGCCGAGGTGGATCTGTCCGGCCCCAAGGTGGATCTGGGCCTGCCAGAGGCCAACGTCGAAGGTCTGGAGGGCAAAGTGAAGGGTCCTAAAGTGAAAATGCCCGAGATGCACGTGAACGTCCCcAAAaTCTCCATGCCcGAGATcGACTTGAACCTGAAGGGCCACAAAACCAAGGGCGGCTTCGACGTTTCCACCCCGAAGGTGGAAGGTCACCTGAAGGGGCCCGA…	protein oligomerization [GO:0051259]; regulation of RNA splicing [GO:0043484]; regulation of voltage-gated calcium channel activity [GO:1901385]	ann.char.bf
Neuroblast differentiation-associated protein AHNAK	AHNK_HUMAN	isogroup02374	2	isotig06707	491	CGAAATCGAccTcaagggcCCcAAAGTGGACATTGATGTTCCAGATGtCGACATccacgggcctGAgggAAAGTTCAAGATGCccaaattcaaGATGcccaaattTgggCTGAAGGGAGAAGGGCCCGAGaTGGACGTGAACCTCCCcAAAGGAGACCTGGACGTGTCCGGCCCCAAGGTGGACATTGAGGGTCCaGAGGTGGACGTGGAGcTGtCCCGAGGGgAAGATCAAAGGCCCCAAGTTCAAGATGCCCGAGATGcACATCAAGGccccAAAaTCTCCATGCCcGACaTCGACcTGAaCCTGAAGGGCCCCAAGGTCAaGGGGGCgTtGATGtCTccGTCCCcAAaCTCGAGGGtGaCcTGAAAGgTCcGGACGtGAGCGTgAAAGGTCcGAaG…	protein oligomerization [GO:0051259]; regulation of RNA splicing [GO:0043484]; regulation of voltage-gated calcium channel activity [GO:1901385]	ann.char.bf
Neuroblast differentiation-associated protein AHNAK	AHNK_HUMAN	isogroup02374	2	isotig06708	390	AAAGGAGATGTCGATGTTTCCCTTCCCAAAcTgGaGGGtGAcCTGAAGGCCCcAGACATCGACATCAAAGGCCCcAAaGTCGATGTTGATCTCCCtGaTGTtGAGtTGGAAGGtCCCGAGGGgAAGATCAAAGGCCCCAAGTTCAAGATGCCCGAGATGcACATCAAGGccccAAAaTCTCCATGCCcGACaTCGACcTGAaCCTGAAGGGCCCCAAGGTCAaGGGGGCgTtGATGtCTccGTCCCcAAaCTCGAGGGtGaCcTGAAAGgTCcGGACGtGAGCGTgAAAGGTCcGAaGTTGgATGTGGACGTtCcTGAGGTGGACaTtGAAGGTCcTGaGGGGAAGTGGAAGGgACCcAaGatCAaGAtGCCGgAGATGAACATCAaGGC	protein oligomerization [GO:0051259]; regulation of RNA splicing [GO:0043484]; regulation of voltage-gated calcium channel activity [GO:1901385]	ann.char.bf
Aryl hydrocarbon receptor	AHR_DELLE	isogroup02599	1	isotig06988	5232	CAGGGACCGCCTGAATGCGGAGCTGGaCCGCTtGGCCAGCCTGCTGCCTTTCCCTCAAGAtGTTATCGCCAAATTGGATAAGCTGtCTGTGcTTAGGCTTAGCGTCAGCTACCTGAGAGCTAAAAGTTTTTTtGACGTtGCATTAAAATCTTCTAACTCTACCAGACCAGAAAGAAATGGCATCCAGgAAGCcTCTAGAACAGGAAAGTCTGGAGAaGGGATGCAGATCCTGGAAGGAGAACTCCTATTGCAGGCATTAAATGGATTTGTGTTAGTTGTTACAGCAGATGCTCTGGTTTTTtATGTCTCTTCTACTATCCAAGACTACTTGGGATTCCAACAATCAGATATTATACAcCAGAGTGTATTTGAGTTGATTCACACAGAAGACAGACCCGA…	cell cycle [GO:0007049]; circadian regulation of gene expression [GO:0032922]; negative regulation of transcription, DNA-templated [GO:0045892]; positive regulation of transcription, DNA-templated [GO:0045893]; response to xenobiotic stimulus [GO:0009410]; transcription, DNA-templated [GO:0006351]	ann.char.bf
Activator of 90 kDa heat shock protein ATPase homolog 2	AHSA2_BOVIN	isogroup05681	1	isotig10070	1949	ACGGCACCAACGTGAACAACTGGCACTGGACGGAGCGGGACGCCACCAGCTGGTCCAAGAGGAAGCTGAAGGAGGTGCTGGAGGGgCTGGTGGTGGAGGGCGAGGCCGGGCGCTGCGAGATCGGCGACCTCAAACACGTGGAGGGCGAAGCGTCCTGCAACAGCCGCAAAGGGAAGCTCATCTTCTTCTACGAGTGGAACCTGCGCCTCAGCTGGAAAGGTACAGTGAAAGAGTCTGGTGAGAAACATAAGGGATCTGTTGAAATTCCTAACCTGTCAGAAGAAAATGAGGTAGATGATACAGAGATAAATGTTAGCAAGAAGAAAGGGGAAGGTGATGTTCTGAAGGACCTGATGAGAACTGAAGGAACCACCAAAGTCAGAGAGGCCCTGAGGGACT…		ann.char
Axin interactor, dorsalization-associated protein	AIDA_HUMAN	isogroup11303	1	isotig15692	961	GGAAGGGCACCGACTTCGACTCcTGGGGGCAGCTGGTGGAGGCGATCGACGAGTACCAGATATTAGCCAGGCACCTCCAGAAAGAGGCGCAGTCTCAGCACAACAACTCGGAATTCACAGAAGATCAAAAGAAAACCATAGCTAAAATTGCAACATGCTTGGAACTGAGGAGTGCAGCTTTACAGTCCACCCAGTCGCAGGATGAGTTTAAGCTTGAGGATCTGAAGAAGTTGGAACCAATATTAAAGAATATCCTCACTTACAATAAGGAGTTCCCCTTtGATGTCCAGCCTGTTCCACTCAGGAAGATTTTAGCACCTGGAGAAGAGGAACACTTGGAGTTTGAGGAGGATGATGAGGAAGGAGGAGCTGGAGCAGGGTCTCCAGACTCTTTTCCTG…	determination of ventral identity [GO:0048264]; dorsal/ventral pattern formation [GO:0009953]; negative regulation of JNK cascade [GO:0046329]; negative regulation of JUN kinase activity [GO:0043508]; regulation of protein homodimerization activity [GO:0043496]	ann.char.bf
Allograft inflammatory factor 1-like	AIF1L_MOUSE	isogroup04791	1	isotig09180	2283	GGGgCTGCGGAGAGCCTCGCAGGACGGGCGGCTGGACGAGATCAACAAGGAGTTTCTCTGTGACCCAAAGTTCAGTAATGAAAAAGACCTGGAGGAGAAGCTGGCAGTGTTCAAAGAGAAATACATGGAGTTTGACCTGAACAACCAAGGCGAGATTGATTTGATGTCTGTCAAAAGGATGATGGAGAAGCTGGGGGCTCCGAAGACCCACCTGGAACTGAAGAGGATGATCTCTGAGGTGACTGGAGGGGTCAGCGACACCATCTCGTACCAGGACTTTGTCAACGTGATGCTTGGGAAACGCTCTGCTGTGCTGAAACTGGTCATGATGTTTGAAGGAAAAGCCAATGAAAGAAACCCAAAACCTTCTGGTCCACCTCCAGAGAGAGACATAGCCAG…		ann.char
Apoptosis-inducing factor 1, mitochondrial	AIFM1_HUMAN	isogroup07954	1	isotig12343	1408	AGCTGTGGTTCTCCGAtGAcccCAACGTGACAGAGAcGcTGCGGTTCAAgCAGTGGAACGGCAAGGAGAGGaGtaTCTATTtCCAGCCGCCGTCTTTCTACGTGCCTGTCCAGGACCTGTCTTCTGTGGAAAaTGGTGGGgTGGCAGTTCTGCCTGGCAAGAAGGTTGTGCACATGGATGTCAGAGGGAACACAGTGAAGCTCAATGATGGGACCCAGATATCCTATGACAAATGTCTCATTGCCACTGGGGgAACCCCCAGgAaCCTGCCTGCCATCGAGCGAGCAGGAAAGGACGTGCAGAAAAGGCTGACCCTcTTCAGAAAGATcGACGACTTCCGAAGGCTGGAGAAGATTTCCAGGGAAGTCAAGTCCATCACAATTATTGGTGGTGGTTTCC…	activation of cysteine-type endopeptidase activity involved in apoptotic process [GO:0006919]; apoptotic process [GO:0006915]; cellular response to aldosterone [GO:1904045]; cellular response to estradiol stimulus [GO:0071392]; cellular response to hydrogen peroxide [GO:0070301]; cellular response to nitric oxide [GO:0071732]; cellular response to oxygen-glucose deprivation [GO:0090650]; chromoso…	ann.char.bf
Apoptosis-inducing factor 2	AIFM2_TAEGU	isogroup09219	1	isotig13608	1216	GGAATTGCCAAGAAGACTTTCATCTCCTACTCGGTGACCTTTGGGGACAGCTTCCGACAAGGCAGGGTCGTGGGCATAGACCCTGGGAGGCAAAAAGTCCTGCTCAGTGATGGTGAGGAGCTCCACTACTCCCATCTCATTATTGCAACAGGCAGTGATGGGCCATTCCCTGGGAAGTTCAACCAAGTCATTGACATGGAAAGTGCCATCCAGACCTATGAAGACATGGTGAAAGAGATTGAgaAATCTCAGCGCATCCTGGTGGTGGGAGGTGGTGCTGCTGGAGTGGAGATGGCTGCCGAGATCAAAACCGAGTACCCAGACAAGGAGGTCATCCTCATTCACTCCAAACCTGCACTGGCTGACGTGGAGCTGCTACCCAGTGTCCGTCAGGAGGTG…	apoptotic process [GO:0006915]	ann.char.bf
Androgen-induced gene 1 protein	AIG1_HUMAN	isogroup07798	1	isotig12187	1437	GGgAGTCCCGCCCGCgCGGCGCGCACACACACAGGGATACACACACGCACACCGGGACACGCGGAAACACGCACACGGGGCACTGGGACACAGACACGGACACAGACACAGGCACACGAAAGCGCACCCCGCGCCGCAAACATGGCGCTGGTGCCCTGCCAGGTGCTGCACGCCGCCATCCTCCTGTCCTATTGCTCCATCCTGTGCAATTACAAGGCTATTGACATGCCCGCGCATCAGACCTATGGAGGCAGCTGGAAATTTCTGACCTTCATAGACCTGGTTATCCAGGCTGTCTTCTTTGGAATTTGCGTCTTGACTGACCTGTCCAGTCTTCTCACTAGAGGGAATGACAGTCAAGAGCAAGAGAGGCAGCTGAAAAAACTCATTTCCCTCCGT…		ann.char
Absent in melanoma 1 protein	AIM1_HUMAN	isogroup09231	1	isotig13620	1210	TCTTCAGTTCCTGGGATACAATCCTCGAATAGCTTCAGTTCAaGTCCTTGGTGGCATAtGGATCATTTATGAACACAGTAATTACAGGGGaCGTCAGATGTTGTTAACGCCAAATGAAATTCCAGATtGGtATAAAtCCAGtGGCTTTTGTCAGATAGGTTCtCTGAGACCTTTACTGCAGAAACGTGTGTACTtCAGGCTtCGAAACAAGGAAACAGGAAAATTCATGTCAGCTGATGGAAACCTAGATAATCTGAATCTCCTCAGAATACAGGTTGCAGAAGATACAGACTCAGATGATCAAATCTGGGTTTATCAGGATGGATTCATAAAGTGTCGGATGGCAGAGGATTGCTGCTTGACAATTGTTGGAAATCTTATAACTCCTGGCTCTAAACT…		ann.char
Absent in melanoma 1 protein	AIM1_HUMAN	isogroup05954	1	isotig10343	1861	AGgAACCTGCCTTTCCtCaTGAAAtAAATGGGAAAgAGAACATtGATTGTACaGATGGTGAAATtAAGAGATCACGACTTGAAAAAAGCTCCCTCTTCTCAAGCTTaCTATCTTCTAAAGAAAAGTTTTTTAGCCCTTCTGTCACTTCAGTAAATAACACAaCAGCTTTtGCAACTGACTCCTCAGGGATGCCTCCTTtACAACAGGATGTTtCTGGgCCaTTCATCaTGCCTCAAAAAcCTGAGTCTCTTTCAGATATGAaGTTTCCAAGTTTtgTGGAGAAGTACCTGCAAGCAGATGgTGCCAAAAAAGAGCTAAGTTTgCAAATGCCCAACTACGGCAaCCcTGAGAAAAGTTTTTCGAGcTGGTTAGGAGCAAGCAGATATGAGTCAAATGTCC…		ann.char
Absent in melanoma 1 protein	AIM1_HUMAN	isogroup12446	1	isotig16835	848	GAGaaagaaaGCACTGCAGAGttaaaaggcaaaaatgAAGAAAGCTTTGCCTCTTATGAGGATATTGGGAAGACAACAGAACTTAAAGTAAAAGCTGCAATATCCCTTTTtAACCAAAGCAGCAAAAGTGATGCTGGTAGTGTCTCTCTGAAGCAAACAGAACCAGAATTAACCACAGCAAAGAAAGAAAGTTCACCTTTAAAACTGCCTTtGCACTCACCTGTTAAAAGTGAAAATGCTCAAGATCTTTtCTACCAAAGAAATTACACGAGCTCAGAATTCCATAGAAACGAAGAAAAaGtGCTGCCAAACACAGAGACATTATCACCATGCAGTAATGATAAATATCcTCTACCATCTCATCAGGTTTCCAGATCAGAATTTAAGAATATGGAAAAT…		ann.char
Aminoacyl tRNA synthase complex-interacting multifunctional protein 1	AIMP1_HUMAN	isogroup09062	1	isotig13451	1235	GGGAGCGGGTCCTTCTTCCCcGGgCGGGCAGCGGCGGCGGCTCCTCTCGGTTCATGTTTTTATCCCGTTTTCTGGTAAAGATGGCAGCCAACAATGCAGTGCTGAACAGACTGGAGCAGAAGGGTGCAGAGGCCGACCAAGTTATTGAGTACCTCAAGCAACAAGTTGCCCTGCTCAAGGAAAAAGCCATCTTGCAAGCATCTCTCCGAGAAGAGAAGAAGCTCCGTGTAGAAAATGCTAAACTGAAGAAAGAAATTGAAGGGCTGAAACAGGAGCTGATTCAGGCTGAAATTCGAAATGGAGTAAAGCAGGTTGCAGTTCCTCCTGGTACAGCCCTTTCAACAGCTTCATTTTCAGAAGATGTTCCACAACCTACGGCAGTTACAGCATCTTCTGGTT…	angiogenesis [GO:0001525]; apoptotic process [GO:0006915]; cell adhesion [GO:0007155]; cell-cell signaling [GO:0007267]; chemotaxis [GO:0006935]; defense response to virus [GO:0051607]; glucose metabolic process [GO:0006006]; inflammatory response [GO:0006954]; leukocyte migration [GO:0050900]; negative regulation of endothelial cell proliferation [GO:0001937]; response to wounding [GO:0009611]; …	ann.char.bf
Aminoacyl tRNA synthase complex-interacting multifunctional protein 2	AIMP2_CRIGR	isogroup11662	1	isotig16051	925	AGCACCTGCCCACCTGCATGTACCCCCTGCCCAACCTGCACCGCGCCCCCGgCAGCGCCGCGCCGCCGCAGGAAGAGGTTGACCCATCACTTCAAGCACTTGAATCCCGCCAGGAGGAGATTCTGAAGCGTTTGTATGAACTGAAGAGTGCTGTGGATGGGCTCTCCAAGATGATACAAACCCCTGATGCTGACTTTGATGTGACAAATATtATTCAAACTGATGAATTTTCTCCTTTGGCAAAAAATGGAGCAGATTTAGATCTGATGCTTGGAAAGGATTATGGTGCCCTGAAAGATGTTGTCATCAATGCAAATCCTTCTCTACCTCCATTGTCACTGTTAGTGATACACAGTCTGCTTTGTGAACGGTACAAAATACTGTCAGCTGTTCACACAC…	apoptotic process [GO:0006915]; cell differentiation [GO:0030154]; multicellular organism development [GO:0007275]; translation [GO:0006412]	ann.char.bf
AH receptor-interacting protein	AIP_BOVIN	isogroup09989	1	isotig14378	1108	GAAGAACCCCcaGCCCCTCATcTTCGATATCGAGGTGCTGAAGGTGGAGCCACCCGGcTCcTACCAGCAGGACCCATGGGCCATGACAGATGAGGAGAAGCTCCAGGCTGTGCCCCAGATCCACAAGGAAGGCAACGAGCTGTACCGGCAGGGCAAAGTGCCTGAGGCAGCTGCCAAATACTACGATGCCATCGCCTGTCTCAAGAACCTGCAGATGAAGGAGCAGCCAGGCTCTCCAGACTGGATCGAGCTGGACCAGAAGATCACACCCCTGCTCTTAAACTACTGCCAGTGCAAGCTGCAGTGTGAGGAGTACTACGAGGTGCTGGATCACTGCTCCTCCATCCTCAACAAGTATGAGGACAATGTCAAGGCCTACTTCAAGCGGGGCAAGGCCCA…	xenobiotic metabolic process [GO:0006805]	ann.char.bf
Adherens junction-associated protein 1	AJAP1_MOUSE	isogroup12489	1	isotig16878	843	CTCGACATCTTCACCGCCTACAACGAGACGCTGCAGTGCTCCCACGAGTGCGTCCGCACCCCcGtGCCcGTCTACGCAGAGGACACGCTGCACTCGCCCGGGgATTACAAAACCACCTTCAATGGAAACAGACCCTCTTCTTCTGACCGGCATCTTATTCCCGTGGCCTTTGTGTCTGAGAAATGGTTTGAAATCTCCTGCTGACTGGCCGAAGCCTGTTTGACTTCTGGGGGCAGGGCAGACGCCAGCGGGCTGTTTCCTGGATTCCATTGGTGAACCTGTAAAAATATAAAAAAATAATGGGTTACCTGTACCTACCATTTcTGTTTACCAGTAGGAGACTCAAAGAGCAGCGTTCTATGGGCCAAATATATTTTTATAAAAATGAACACGCCTATA…	cell adhesion [GO:0007155]	ann.char.bf
A-kinase anchor protein 17A	AK17A_HUMAN	isogroup06110	1	isotig10499	1809	TGAAGCAACCAGgAAAATCcATTtCCAACTGGGAAGTGATGGAAAGATTGAAGGGGATGGTGCAAACTCATCAGTTTtCCACTCTGCGGATTTCTAAAaGCACAaTGGATTTCATtCGGTTTGAAGGAGAGGTCGAGAACAAAAGCTTGGTTAAATCTTTCCTGGCGTGCCTTGATGGCAAAACcATAAaGCTGAGCGGCTTCTCTGACATTTTAAAAGTGCGTGCTGCGGAATACAAGATTGACTTTCCTACCAGACATGACTGGGACTCGTTTTtCCGTGATGCAAAAGATATGAACGAAACCTTGCCTGGGGAAAGGCCCGATACGATTCACTTGGAGGGTTTGCCTTGTAAGTGGTTTGCAGCAAAGGAGACCGGCTCGGAAAAGCCAAGTGAAG…	B cell activation [GO:0042113]; mRNA processing [GO:0006397]; regulation of RNA splicing [GO:0043484]; regulation of transcription, DNA-templated [GO:0006355]; RNA splicing [GO:0008380]; signal transduction [GO:0007165]	ann.char.bf
Alcohol dehydrogenase [NADP(+)]	AK1A1_CHICK	isogroup03715	1	isotig08104	2947	GCCGGGCAGCAGCGGCTGGAACGGCGCAGCGgCAATAACCTCAGCAGCAGCAGCAATAGCAATAACCTCAGCAGCAGCGGTCGGTACCGGCGGCAAAGATGCCTGCAACATGCGACTTCGTTGTGCTCCACACTGGGCAGAAGATGCCTCTCGTGGGACTGGGAACTTGGAAAAGTGACCGTGGCCAAGTGAAGGAGGCAGTGAAACACGCTCTCAGCGTGGGCTATCGCCACATCGACTGcGCAGCCGCCTACAGCAACGAAGCCGAGATCGGGGAGGCCTTCCAGGAATGTGTTGGGCCCAACAAGGTTATTAAAAGGGAGGACCTGTTTGTAACATCAAAGCTCTGGAATACCAAGCACCACCCAGAAGATGTAGAGCCAGCGCTGAGGAAAACAC…		ann.char
Aldo-keto reductase family 1 member B10	AK1BA_HUMAN	isogroup09682	1	isotig14071	1149	GGACCGACGGACGGAcgGACGGACGGACAGCGGCACCATGGCCATCCCCTGCGTGGAGCTCAGCAACAAGATGAAGATCCCCGCCCTGGGGCTGGGCACCTGGCAGGCTCCCCCGGGAAAGGTGGAGGAGGTGGTGAAGTTCGCTATTGACGCTGGCTACCGCCACTTCGACTGCGCCTACTTCTACCAGAACGAGAACGAGATAGGGAACGCGGTCCAGCAGAAGATCAAGGACGGGGTGGTGAAACGGGAAGAcCTCTTCATTGTCACTAAGCTGTGGAACACGTTCCATGAGAAGCCCATGGTtAAGGTGGGGCTCAAGAAGAGCCTTGCTGCACTCCAGCTGGACTACCTCGACCTCTACCTGATGCACTTCCCCATGGGATTCAaGGCTGGTGA…	cellular aldehyde metabolic process [GO:0006081]; daunorubicin metabolic process [GO:0044597]; digestion [GO:0007586]; doxorubicin metabolic process [GO:0044598]; farnesol catabolic process [GO:0016488]; retinoid metabolic process [GO:0001523]; steroid metabolic process [GO:0008202]	ann.char.bf
Aldo-keto reductase family 1 member B10	AK1BA_HUMAN	isogroup06566	1	isotig10955	1696	GTgTTTGCGGCCATGGCGACTTACGTGCAGCTCAACACCGGGGCCAAGATGCCCATCGTGGGGCTGGGCACGTGGAAGTCCCAGCCGGGGAAGGTGACAGCTGCGGTGATGGCTGCCATCGATGCCGGGTACCGGCACTTCGACTGCGCCTATGTGTACCAGAACGAGAACGAAGTTGGGGAAGGGATCCAGAAGAAAATCAAGGAAGGCGCTGTGaagCGAGAGGACCTCTTTGTGGTCAGCAAGCTGTGGTGCACGTTTCATGAcAAGCCTCTGGTGAAGGGAGCCTGCCAGAAGACTCTTGCTGCCCTGAAACTGGATTACCTGGATCTGTACCTCATCCACTGGCCCCTTGGTTTCAAGGCAGGAGAGGAgCTgTTCCCTGTAGATGACAAAGGC…	cellular aldehyde metabolic process [GO:0006081]; daunorubicin metabolic process [GO:0044597]; digestion [GO:0007586]; doxorubicin metabolic process [GO:0044598]; farnesol catabolic process [GO:0016488]; retinoid metabolic process [GO:0001523]; steroid metabolic process [GO:0008202]	ann.char.bf
Aldo-keto reductase family 1 member B10	AK1BA_HUMAN	isogroup09725	1	isotig14114	1138	AGCAGCGCTCCCGGAGCCATGGCCACCTGCGTGCAGCTCTACACCGGGGCCAGGATGCCCGTCGTGGGGCTGGGCACATGGAAGTCTGAAGCAGGGCAAGCAAAGGCTGCAGTGATGGCTGCCATCGATGCTGGGTACCGCCACGTGGACTGTGCCTATGCATACCACAATGAGAATGAGATTGGGGAAGGCATCCAGCAGAAAATCAAGGAAGGGGCTGTGAAAAGACAAGATCTCTTTGTTGTCAGCAAGCTGTGGTCCACTTTTCATGAGAAGTCTcTGGTGAAGGGAGCCTGCCAGAAGACTCTTGCCAACCTGAAATTGGATTACCTGGATCTCTACCTcATGCACTGGCCTATGGGGTTCAAGGCAGGAGAGGAGCTGTTTCCTGCAGATGAC…	cellular aldehyde metabolic process [GO:0006081]; daunorubicin metabolic process [GO:0044597]; digestion [GO:0007586]; doxorubicin metabolic process [GO:0044598]; farnesol catabolic process [GO:0016488]; retinoid metabolic process [GO:0001523]; steroid metabolic process [GO:0008202]	ann.char.bf
3-oxo-5-beta-steroid 4-dehydrogenase	AK1D1_HUMAN	isogroup10000	1	isotig14389	1106	TGCCGGCGCGATGAACCTCACCGCcGAGAGCCACCGCGTTCCGCTCAGCGACGGCAACAGCATCCCGCTCCTGGGGCTGGGCACCTACGCCGACCCCCAGAAAACTCCCAAAGGCTCCTGCCTGGAGGCGGTAAAGATTGCCATTGACGCTGGTTACCGCCACATCGACGGTGCCTTTGTCTACTTCAATGAGCATGAAGTGGGACAAGCCATCCGGGAGAAGATTGCCGAAGGGAAGATCAAGAGAGAAGACATCTTTTACTGCGGCAAGCTGTGGAATACCTGCCACCCCCCAGAGCTGGTGCGTCCCACCCTGGAGAAAACCCTGAAGATCCTGCAGCTGGACTATGTTGACCTCTACATCATTGAGCTGCCAATGGCTTTCAAGCCTGGAGATGC…	androgen metabolic process [GO:0008209]; bile acid biosynthetic process [GO:0006699]; bile acid catabolic process [GO:0030573]; C21-steroid hormone metabolic process [GO:0008207]; cholesterol catabolic process [GO:0006707]; digestion [GO:0007586]; oxidation-reduction process [GO:0055114]	ann.char.bf
A-kinase anchor protein 10, mitochondrial	AKA10_HUMAN	isogroup01501	2	isotig04962	1235	ttaCAGAagcaatgagaaatgacatagtTgcaaagaTCTGtggggaggATggccaagtggatcccaactgctttGTTACAGCACAGTCCATAGTGTTCAATGCAATGGAACAAGAGCACTTTAGTGAGTTTCTGCGGAGTCACCAtTTCTGTAAATACCAGATCGAGGTGCTGACCAGTGGGACTGTGTATCTGGCTGACATTCTGTTCTGTGAGTCAGCCCTGTTCTACTTCTCTGAGTACATGGAGAAGGAaGATGCAGTTAATGTATTGCAGTTCTGGTTGGCAGCAGATAACTTCCAGTCTCAGCTTGCTGCCAAAAAAGGCCAGTATGATGGGCAAGAAGCACAGAACGATGCCATGATTTtGTATGACAAGTACTTCTCCCTGCAGGCCACAC…	blood coagulation [GO:0007596]; protein localization [GO:0008104]; signal transduction [GO:0007165]	ann.char.bf
A-kinase anchor protein 10, mitochondrial	AKA10_HUMAN	isogroup01501	2	isotig04961	2246	ttaCAGAagcaatgagaaatgacatagtTgcaaagaTCTGtggggaggATggccaagtggatcccaactgctttGTTACAGCACAGTCCATAGTGTTCAATGCAATGGAACAAGAGCACTTTAGTGAGTTTCTGCGGAGTCACCAtTTCTGTAAATACCAGATCGAGGTGCTGACCAGTGGGACTGTGTATCTGGCTGACATTCTGTTCTGTGAGTCAGCCCTGTTCTACTTCTCTGAGTACATGGAGAAGGAaGATGCAGTTAATGTATTGCAGTTCTGGTTGGCAGCAGATAACTTCCAGTCTCAGCTTGCTGCCAAAAAAGGCCAGTATGATGGGCAAGAAGCACAGAACGATGCCATGATTTtGTATGACAAGTACTTCTCCCTGCAGGCCACAC…	blood coagulation [GO:0007596]; protein localization [GO:0008104]; signal transduction [GO:0007165]	ann.char.bf
A-kinase anchor protein 11	AKA11_HUMAN	isogroup11565	1	isotig15954	935	GACAGTAATGGTAAcAGCAGTAGCTGGAGCAGTCTTGGTTTAGAAGGGGATGTGTATGAGGAGAATTTATCCTTTCCAACATCAGACAGTGATGGAACAGAAGATAAAGATGAAGATTCCAAGGATGCTGTAGAAGGTTTGGAGCAAATGCGGAaGACTTTATCAATAATGAATATTGATCTGGAACCAAATCTAGTGGACCTGCAGCTCAGAGCAGCACTCCAGTGGCTGGCAGCTTCTGAAACTGAGGTGTCTGACCTTCACTTTCGTGACACTGCTGCAAGGGAGTTTGTCTTTCTTTCCAGAAGACTGAGAGAAAGGGACTGGAAAGTTGGAGATCTCTTGCAAGCAGTGCTGAAATATTGTGAAATGATAGAGACAGCCTCTGATGGAGAGCAA…	intracellular signal transduction [GO:0035556]; regulation of protein kinase A signaling [GO:0010738]	ann.char.bf
A-kinase anchor protein 11	AKA11_HUMAN	isogroup14608	1	isotig18997	662	AGCAGATCTCAAAATGAAAACTAGTAAGGAAGCAGAGAAGCAAGCAAAATCTAAACATAAGTCACTAATGATAAGAGATAGCATTCAGAAATTTGCAACTGAATTGGTTGAAAAAAaGTTTTGGCAGTGCATTTAAAGACCTCCAGAAAGGTGTTTCTTCATGCACGAATGCACTTTGTCATTTGGCTGCTAGGCTGACTTCATCAGTCTTTCAAATGGCTTTTTATGAGATTGGAAGGCGTAGAGCAATCTCACTGAAGGAGCGTGCCATTAATGGCATAGCAAACTTTTTGgTGAGTGAAGCTATAACTGGTGCTTTGAAAGAATTGCGTCAGgTAAAGAAaCAAATATTtACCAACACTGTTGCACGgTTCGCAGCAGACCTTGCTGAAGAACTTG…	intracellular signal transduction [GO:0035556]; regulation of protein kinase A signaling [GO:0010738]	ann.char.bf
A-kinase anchor protein 7 isoform gamma	AKA7G_HUMAN	isogroup01497	2	isotig04953	3061	TGGGCTGGAAAATGTACAGCAAAAGAAAATCTTTGAAGGGAGTAAGGAAGAAACACAACAGAGAGAAGAGCCATGTGCTGCTGCTTCAGTAGACTCTCTAATGGCAGAAATGCCATTTGTGGACACAGATATTGAAGATGAATGTGCTATGCATGCAACTTCTGAACTAAGTATTAAGAAGAAAAGAAAGCGGACTACTGGAAGGGAAGTTGAAGAGGGCACTGAGAGAAAGAaGAAAAAGAATAAACAATATCAGCCAAATTATTTCATTtCTCTTCCAATTACAAATCCAAAGATTACTGGCAGTATTCAGGCTGTCCAAGATGCAATAATACAAAAGGATCAAAGGCTTTCCAAAGCAATGGTTCGCTCTGGCTCATTGCATGTCACCATGTTAGT…	protein localization [GO:0008104]; regulation of protein kinase A signaling [GO:0010738]	ann.char.bf
A-kinase anchor protein 1, mitochondrial	AKAP1_RAT	isogroup03507	1	isotig07896	3118	GTGAGttTGGACaaggaAGCTgAGaAaattgAGCAGGTAGCaataCagaTaaTTTccaaGGTCATTTtGGCAGCAACTGAGGAAGTGCTGTCGGGTTCTGCAGGCGACACATCCCCTTGGCTCTGCCAGGCTGCTGCCAGCCGAGCTGAGGCTCCTCTGGGgATGGAGAGTGTTGCTGCCTCTGCTCAGGTGCTGGTGGAGGGAGCCACaGCAGCTGCTGAGAGCGTGGCTGCAGGGAGCAGTGCAGAGGAGCAGGGTCAGGGTGTGACAGGTTGTTCATCACACGGCTGTTGGGCCAGCCCTGTTCAGGAGAaCACGGAGGACTGTGGGGTGAAGAGCCAGGCGTGCAGGGAGTCCCcAGgAGTTGATAGGACTCATGTGGagaaCTCTCTGGAAAAG…	cellular response to cAMP [GO:0071320]; cellular response to peptide hormone stimulus [GO:0071375]; negative regulation of cardiac muscle hypertrophy [GO:0010614]; negative regulation of NFAT protein import into nucleus [GO:0051534]; negative regulation of protein dephosphorylation [GO:0035308]; regulation of protein kinase A signaling [GO:0010738]	ann.char.bf
A-kinase anchor protein 2	AKAP2_HUMAN	isogroup10111	1	isotig14500	1092	TAAGAAATCTTCCAGAATCCCTGAGGATGACATCAGGTTAAGGAAAAaCAGAGACCAAAACTGTGCCAaTTTcTTGGAGCCAGCTACTGtGCTtGCTACAAAAGAAGAGAAAATGGAAATTGAaGTTCCAGTTTCTGAACATAAAAGCATCACCACAGTGGCTTCACCACATCCCATAGACAATCCAACCCACTTCTTTTCTCCTGCTTCCAGTCGAAATGGACTTAGGGACAGGCATGAATCTCTGGACAGTGAAGTTGCTAAAGAGATCAGATACCTAGATGAAGTGCTGGAGGCTAATTGCTGCGATTCTGCTGCAGACAGTACATTTAATGGGACATCCTCCCCTGAACCAAGTGCAGTCTCCATTATGGATGGTTCAGGAGCATCTGCTAATGT…		ann.char
A-kinase anchor protein 2	AKAP2_HUMAN	isogroup00998	2	isotig03956	4663	ATGGAGAATTCATGAGTGCGAgggcAGTCTTCACaaTGgtGAAGGaCGACgggcagggaattcTAGAccacttcccaAaGTCaGGCAGCGcCTCTTcGcctccAGAGGAGCTTGACTCTGGTTTGGATGACTTGTCTGTCAGGTCTCAGGATACCACTGTCTTGGAGACCCTTTCCAaTGACTTCAGCATGGATAACATAAGTGACAGCGGTGCCTCcAATGAGACCATGAGCGCCCTGCAGGAAAGTTCTCTAGCAGATTTCTCTCTGCCACAGACCCCGCAGGCCGAAACGCCGGCTGAGTgCAGGGCTGAAGGCATCTCCAAGTCTTTCAGTGACCcAGGCTGTGATTCACCCTCCTCTGCCTTGGCAGACTCCATGCTGAtGgACGACCAGCTGg…		ann.char.bf
A-kinase anchor protein 2	AKAP2_MOUSE	isogroup00998	2	isotig03955	4703	ATGGAGAATTCATGAGTGCGAgggcAGTCTTCACaaTGgtGAAGGaCGACgggcagggaattcTAGAccacttcccaAaGTCaGGCAGCGcCTCTTcGcctccAGAGGAGCTTGACTCTGGTTTGGATGACTTGTCTGTCAGGTCTCAGGATACCACTGTCTTGGAGACCCTTTCCAaTGACTTCAGCATGGATAACATAAGTGACAGCGGTGCCTCcAATGAGACCATGAGCGCCCTGCAGGAAAGTTCTCTAGCAGATTTCTCTCTGCCACAGACCCCGCAGGCCGAAACGCCGGCTGAGTgCAGGGCTGAAGGCATCTCCAAGTCTTTCAGTGACCcAGGCTGTGATTCACCCTCCTCTGCCTTGGCAGACTCCATGCTGAtGgACGACCAGCTGg…	actin filament organization [GO:0007015]; protein localization [GO:0008104]; transmembrane receptor protein serine/threonine kinase signaling pathway [GO:0007178]	ann.char.bf
A-kinase anchor protein 8	AKAP8_RAT	isogroup00538	3	isotig02955	1360	AGGaGGGGAGCaCTGGGAaCGcTGGgagCACTGGgAACGCTGGGaGCACTGGgAACGAGCCTGGCAACGAGCcTGGCAGCGAGGACCCcAAAAaCcccGACaGCGACGGCGACGGCAACGAGCGCGACTCGGAGCACGGAGATGAAGGTGAAGGAGATGAAAAATCCTTGGATGAGGCAGACAGAGCATCGGAGGATGAGGAcGAGGAGGTGAAGAAGAAACGGGAGAAGCAGCGCAGGAGGGACAGGATGAGAGACAGGGCCATGGACAGGATCCAGTTTGCCTGTTCTGTGTGCAAATTCAGGAGCCTGGAGGAGGAGGAGATCCAGAGGCACCTGCAGAGCAAATTCCACCGGGACACGCTGCGCTACATCGGCACCAAGCTGCCCGACAAAACCG…	cell cycle G2/M phase transition [GO:0044839]; cellular response to lipopolysaccharide [GO:0071222]; cellular response to prostaglandin E stimulus [GO:0071380]; innate immune response [GO:0045087]; mitotic cell cycle [GO:0000278]; mitotic chromosome condensation [GO:0007076]; negative regulation of tumor necrosis factor production [GO:0032720]; positive regulation of histone deacetylation [GO:003…	ann.char.bf
A-kinase anchor protein 8	AKAP8_RAT	isogroup00538	3	isotig02956	881	AGGaGGGGAGCaCTGGGAaCGcTGGgagCACTGGgAACGCTGGGaGCACTGGgAACGAGCCTGGCAACGAGCcTGGCAGCGAGGACCCcAAAAaCcccGACaGCGACGGCGACGGCAACGAGCGCGACTCGGAGCACGGAGATGAAGGTGAAGGAGATGAAAAATCCTTGGATGAGGCAGACAGAGCATCGGAGGATGAGGAcGAGGAGGTGAAGAAGAAACGGGAGAAGCAGCGCAGGAGGGACAGGATGAGAGACAGGGCCATGGACAGGATCCAGTTTGCCTGTTCTGTGTGCAAATTCAGGAGCCTGGAGGAGGAGGAGATCCAGAGGCACCTGCAGAGCAAATTCCACCGGGACACGCTGCGCTACATCGGCACCAAGCTGCCCGACAAAACCG…	cell cycle G2/M phase transition [GO:0044839]; cellular response to lipopolysaccharide [GO:0071222]; cellular response to prostaglandin E stimulus [GO:0071380]; innate immune response [GO:0045087]; mitotic cell cycle [GO:0000278]; mitotic chromosome condensation [GO:0007076]; negative regulation of tumor necrosis factor production [GO:0032720]; positive regulation of histone deacetylation [GO:003…	ann.char.bf
A-kinase anchor protein 8	AKAP8_RAT	isogroup00538	3	isotig02954	1411	AGGaGGGGAGCaCTGGGAaCGcTGGgagCACTGGgAACGCTGGGaGCACTGGgAACGAGCCTGGCAACGAGCcTGGCAGCGAGGACCCcAAAAaCcccGACaGCGACGGCGACGGCAACGAGCGCGACTCGGAGCACGGAGATGAAGGTGAAGGAGATGAAAAATCCTTGGATGAGGCAGACAGAGCATCGGAGGATGAGGAcGAGGAGGTGAAGAAGAAACGGGAGAAGCAGCGCAGGAGGGACAGGATGAGAGACAGGGCCATGGACAGGATCCAGTTTGCCTGTTCTGTGTGCAAATTCAGGAGCCTGGAGGAGGAGGAGATCCAGAGGCACCTGCAGAGCAAATTCCACCGGGACACGCTGCGCTACATCGGCACCAAGCTGCCCGACAAAACCG…	cell cycle G2/M phase transition [GO:0044839]; cellular response to lipopolysaccharide [GO:0071222]; cellular response to prostaglandin E stimulus [GO:0071380]; innate immune response [GO:0045087]; mitotic cell cycle [GO:0000278]; mitotic chromosome condensation [GO:0007076]; negative regulation of tumor necrosis factor production [GO:0032720]; positive regulation of histone deacetylation [GO:003…	ann.char.bf
A-kinase anchor protein 9	AKAP9_HUMAN	isogroup00181	6	isotig01647	6465	TCTGGGAAAGTCCAGCCTTCCAAACAAGCTGGATGGGACACTGAcACAGAGGAGTCAGTAAAACCCTGCATCCGTGTGGGgTATGAAAAaGAGTCCTGTTCCTTATATCATGGTAGTAGTATGGGAGATGATGATATTAACATGTGGTCAGGAGCAGCAGGTGAAGGACTGCTGAGCcAACATCTTGCAGAAAGTGGGATGGAAATAGATCCTGAAAATGAAGAGCTCATTCTGAATATTAGTTCTCGACTGCAGGCGGCTGTTGAAAaGCTTCTGGAaGCTATCAATGAAACTTCAAATCAGCTTGAACATGCAAAAATTACTCAGACAGAACTCATGCGAGAATCCTTCAAGAAGCAGCAAGAGGCCACAGAATTTATCAGGTATCAGGAAGAGTTA…	cardiac conduction [GO:0061337]; cellular response to cAMP [GO:0071320]; chemical synaptic transmission [GO:0007268]; ciliary basal body docking [GO:0097711]; G2/M transition of mitotic cell cycle [GO:0000086]; maintenance of centrosome location [GO:0051661]; MAPK cascade [GO:0000165]; microtubule nucleation [GO:0007020]; negative regulation of adenylate cyclase activity [GO:0007194]; positive re…	ann.char.bf
A-kinase anchor protein 9	AKAP9_HUMAN	isogroup04092	1	isotig08481	2653	GCACAGACGCCATGGAGGATGAGGAGCGGCTGAAGAaGCTGGAGGCTGGGAAAGCCAAGCTTGCCCAATTtAGGCAGCGGAAGGCGCAAACTGATGGTCAAAAtGGATCAAaGAAGCAGAAAAaGAAGAaGAAAaCAGCaAaCaTCAAaGATGAAGAATCAaTACAAGATGGGATtGAAaCtGATCAATCTCGAGGTGATGAAaTATCcACATGCAGCAGTCGAAGGGgAGCAGCTGCCACTGCTGACTTTGCTATTATCAGgACTTtGCATAGTGGAGAAATTaTCAAaCACACCCAGGCTTACACCATTGAGCcGgAAAGTGAAATTTCCaCCACAGTAGAAGATtACAGTTCTGAGGTAAaTGGTTGCAGTTTTGTGACAAGagCAGCTATACCtG…	cardiac conduction [GO:0061337]; cellular response to cAMP [GO:0071320]; chemical synaptic transmission [GO:0007268]; ciliary basal body docking [GO:0097711]; G2/M transition of mitotic cell cycle [GO:0000086]; maintenance of centrosome location [GO:0051661]; MAPK cascade [GO:0000165]; microtubule nucleation [GO:0007020]; negative regulation of adenylate cyclase activity [GO:0007194]; positive re…	ann.char.bf
A-kinase anchor protein 9	AKAP9_HUMAN	isogroup00181	6	isotig01651	1676	tgggaaaaatgatgcAgACAAAagCTGCAAAATGCATCTCcAAagCTGAAGCAGTTGGCTTGgAAAGCTGCTAGCAGATTGCAGTTtGAAaCAGCAGATGATCAAGACTTCATTGCAGTACAAAATGCTATTGAAGAAGTTATTTCAGAACTGAAAATaCTGCCTGGATTGTCCAGTCTGGAaGAGCTGGTGCTGCCGCcAGGGACTCCATCCAGCTCACTGACTGAGAGGCTGCTGAGGCAAAATGCTGAGCTGACAGGCTTTGTCAGCAGACTGAGTGAAGAGAAGAATAATTTGAGGAATGCTGTTATGAAACTGGAGGAAGAACTGAGAAGATACCAGCACAGACAACCTTCTGCAGACTATTGTTCTAGGCACTCATCAGATGTtGgAGTGAAT…	cardiac conduction [GO:0061337]; cellular response to cAMP [GO:0071320]; chemical synaptic transmission [GO:0007268]; ciliary basal body docking [GO:0097711]; G2/M transition of mitotic cell cycle [GO:0000086]; maintenance of centrosome location [GO:0051661]; MAPK cascade [GO:0000165]; microtubule nucleation [GO:0007020]; negative regulation of adenylate cyclase activity [GO:0007194]; positive re…	ann.char.bf
A-kinase anchor protein 9	AKAP9_HUMAN	isogroup00181	6	isotig01652	1631	tgggaaaaatgatgcAgACAAAagCTGCAAAATGCATCTCcAAagCTGAAGCAGTTGGCTTGgAAAGCTGCTAGCAGATTGCAGTTtGAAaCAGCAGATGATCAAGACTTCATTGCAGTACAAAATGCTATTGAAGAAGTTATTTCAGAACTGAAAATaCTGCCTGGATTGTCCAGTCTGGAaGAGCTGGTGCTGCCGCcAGGGACTCCATCCAGCTCACTGACTGAGAGGCTGCTGAGGCAAAATGCTGAGCTGACAGGCTTTGTCAGCAGACTGAGTGAAGAGAAGAATAATTTGAGGAATGCTGTTATGAAACTGGAGGAAGAACTGAGAAGATACCAGCACAGACAACCTTCTGCAGACTATTGTTCTAGGCACTCATCAGATGTtGgAGTGAAT…	cardiac conduction [GO:0061337]; cellular response to cAMP [GO:0071320]; chemical synaptic transmission [GO:0007268]; ciliary basal body docking [GO:0097711]; G2/M transition of mitotic cell cycle [GO:0000086]; maintenance of centrosome location [GO:0051661]; MAPK cascade [GO:0000165]; microtubule nucleation [GO:0007020]; negative regulation of adenylate cyclase activity [GO:0007194]; positive re…	ann.char.bf
A-kinase anchor protein 9	AKAP9_HUMAN	isogroup00181	6	isotig01649	6031	TTAATTGATCTGAAACTTAAACAGGAAAGTGATTTGATGCACCTTCAATAACAGTCCTTTGAAAACTACCTAAAGGATAGTAATTTTAATATGAATTTGCTTCAGTCAGTATCATGATTATTTCTCAGAAGAAAATACATTTTCAAAAAaaGAAAAaTAATAAAAaCCCAAGCCAGTTCACATCCTTCTGCAGATTACAGCATGGATACCTTGGGGAGTGGTTTTACTTCATAACATTGCTTACTATTCATATCTAAAAGTAGTGATGCTTTTATTATACTCAGAATTGCTGGAGGAAACAGAAAAGCTAATGAAGGAAAAAATTGAAGTACAACGTCAAGCTGAAAAaGAGTATGATGACCTTCAGAAGCAAGTTAAAGTCTTGGAAGTAGACTTGGA…	cardiac conduction [GO:0061337]; cellular response to cAMP [GO:0071320]; chemical synaptic transmission [GO:0007268]; ciliary basal body docking [GO:0097711]; G2/M transition of mitotic cell cycle [GO:0000086]; maintenance of centrosome location [GO:0051661]; MAPK cascade [GO:0000165]; microtubule nucleation [GO:0007020]; negative regulation of adenylate cyclase activity [GO:0007194]; positive re…	ann.char.bf
A-kinase anchor protein 9	AKAP9_HUMAN	isogroup00181	6	isotig01648	6420	TCTGGGAAAGTCCAGCCTTCCAAACAAGCTGGATGGGACACTGAcACAGAGGAGTCAGTAAAACCCTGCATCCGTGTGGGgTATGAAAAaGAGTCCTGTTCCTTATATCATGGTAGTAGTATGGGAGATGATGATATTAACATGTGGTCAGGAGCAGCAGGTGAAGGACTGCTGAGCcAACATCTTGCAGAAAGTGGGATGGAAATAGATCCTGAAAATGAAGAGCTCATTCTGAATATTAGTTCTCGACTGCAGGCGGCTGTTGAAAaGCTTCTGGAaGCTATCAATGAAACTTCAAATCAGCTTGAACATGCAAAAATTACTCAGACAGAACTCATGCGAGAATCCTTCAAGAAGCAGCAAGAGGCCACAGAATTTATCAGGTATCAGGAAGAGTTA…	cardiac conduction [GO:0061337]; cellular response to cAMP [GO:0071320]; chemical synaptic transmission [GO:0007268]; ciliary basal body docking [GO:0097711]; G2/M transition of mitotic cell cycle [GO:0000086]; maintenance of centrosome location [GO:0051661]; MAPK cascade [GO:0000165]; microtubule nucleation [GO:0007020]; negative regulation of adenylate cyclase activity [GO:0007194]; positive re…	ann.char.bf
A-kinase anchor protein 9	AKAP9_HUMAN	isogroup00181	6	isotig01650	5986	TTAATTGATCTGAAACTTAAACAGGAAAGTGATTTGATGCACCTTCAATAACAGTCCTTTGAAAACTACCTAAAGGATAGTAATTTTAATATGAATTTGCTTCAGTCAGTATCATGATTATTTCTCAGAAGAAAATACATTTTCAAAAAaaGAAAAaTAATAAAAaCCCAAGCCAGTTCACATCCTTCTGCAGATTACAGCATGGATACCTTGGGGAGTGGTTTTACTTCATAACATTGCTTACTATTCATATCTAAAAGTAGTGATGCTTTTATTATACTCAGAATTGCTGGAGGAAACAGAAAAGCTAATGAAGGAAAAAATTGAAGTACAACGTCAAGCTGAAAAaGAGTATGATGACCTTCAGAAGCAAGTTAAAGTCTTGGAAGTAGACTTGGA…	cardiac conduction [GO:0061337]; cellular response to cAMP [GO:0071320]; chemical synaptic transmission [GO:0007268]; ciliary basal body docking [GO:0097711]; G2/M transition of mitotic cell cycle [GO:0000086]; maintenance of centrosome location [GO:0051661]; MAPK cascade [GO:0000165]; microtubule nucleation [GO:0007020]; negative regulation of adenylate cyclase activity [GO:0007194]; positive re…	ann.char.bf
Ankyrin repeat and IBR domain-containing protein 1	AKIB1_HUMAN	isogroup00967	2	isotig03894	5774	AGAGGGCGCCGTACCCGGAGTGGAGCGGGAGACAGGAGCGgCCGCTGGgCACATGgAAGCTCTGAGTGGCGGGCGCGgAGGTGCCGGGAAGGGCCGGGgAgAGCCCCTGTGAGGAGCCGGCTGTGAAGCATGTTACAGAACCGTACAACAAGTGGATGAAGGGGAAAGGAAGAAGTGCCATTGATAGCTAGGATAGCAACATGGGAAATACAACCACCAAGTTCCGCAAAGCCCTTATAAATGGAGATGAAAACTTGGCCTGCCAAATCTATGAGAGCAACCCTCAACTAAAAGAAACTCTTGACCCAAATACTTCTTATGGAGAAACGTACCAGCACAATACTCCACTCCATTATGCTGCTAGGCATGGAATGAATCGTATCCTGGGAACTTTCCTTT…	positive regulation of proteasomal ubiquitin-dependent protein catabolic process [GO:0032436]; protein polyubiquitination [GO:0000209]; protein ubiquitination involved in ubiquitin-dependent protein catabolic process [GO:0042787]	ann.char.bf
Ankyrin repeat and IBR domain-containing protein 1	AKIB1_HUMAN	isogroup00967	2	isotig03893	5864	AGAGGGCGCCGTACCCGGAGTGGAGCGGGAGACAGGAGCGgCCGCTGGgCACATGgAAGCTCTGAGTGGCGGGCGCGgAGGTGCCGGGAAGGGCCGGGgAgAGCCCCTGTGAGGAGCCGGCTGTGAAGCATGTTACAGAACCGTACAACAAGTGGATGAAGGGGAAAGGAAGAAGTGCCATTGATAGCTAGGATAGCAACATGGGAAATACAACCACCAAGTTCCGCAAAGCCCTTATAAATGGAGATGAAAACTTGGCCTGCCAAATCTATGAGAGCAACCCTCAACTAAAAGAAACTCTTGACCCAAATACTTCTTATGGAGAAACGTACCAGCACAATACTCCACTCCATTATGCTGCTAGGCATGGAATGAATCGTATCCTGGGAACTTTCCTTT…	positive regulation of proteasomal ubiquitin-dependent protein catabolic process [GO:0032436]; protein polyubiquitination [GO:0000209]; protein ubiquitination involved in ubiquitin-dependent protein catabolic process [GO:0042787]	ann.char.bf
Aurora kinase A-interacting protein	AKIP_MOUSE	isogroup10730	1	isotig15119	1021	GCGGGCGGCCGGAAGTTCCGGTGGCGGCGGGGCCGTCATTGCTGGCTCTGCCAGTGAACAAAGCGAAACAAAATGTTAATATCACGGCTGAGTTCCCAGTTGCTGAAGGCTTCGAGAATTGCAGGCCACCTCTTGCCCAGGTCAGTGTCCTCCTTCCTCTGCTGCCGCTCTCCATCCGCCTGCTACAGCACCCAGCCCCCcAACACCAGCGGGGCCCAGCCCCAGCAGTGGCACACGCTGGACCCTGAGCTGGAGGAGATCCTGATTCCCAGGAAACTCTCCATCAGCCCCTTGGAGAGCTGGCTGACAGTCAGGTACTCCCTCCCCAAAGCTGAGGGGGCTCAGGAAGAAGTGAGCCATGAAAACCCCCAGCCCTCAGAGTGTCCCCCTCCTGCTGGG…	mRNA processing [GO:0006397]; positive regulation of proteolysis [GO:0045862]; protein ubiquitination [GO:0016567]	ann.char.bf
Akirin-2	AKIR2_HUMAN	isogroup08408	1	isotig12797	1339	TtGAAAaGgACTCTGgATttCGACCCGCTGCTGAGCCCGGCGTCcccGAAGCGAAGGCGATGTGCGCCATTGTCAGCCCCGGCCTCAGCCGCCTCCTCCTCCTTCGCCGCCGCTGCCTCTTCCCCGCAGAAGTACCTGCGCATGGAGCCCTCGCCCTTCGGAGAGGTGTCGTCCCGGCTCACCACAGAACAAATTCTGTATAACATAAAACAGGAGTACAAACGCATGCAGAAGAGAAGACATTTAGAAAATAGCTTCCAGCAGACAGATCCTTGTTGTTCTACTGATGCACAGCCACATGCATTTCTCCTTACTGGACCAGCTTTGCCAGGTACTTCATCTGCAGCATCATCACCATTGAAAAAAGAGCAGCCCCTGTTTACTCTCAGACAAGTTGGA…	embryo development [GO:0009790]; innate immune response [GO:0045087]; negative regulation of transcription from RNA polymerase II promoter [GO:0000122]; positive regulation of cell proliferation [GO:0008284]; positive regulation of endopeptidase activity [GO:0010950]; positive regulation of interleukin-6 production [GO:0032755]; positive regulation of transcription from RNA polymerase II promoter…	ann.char.bf
A-kinase anchor protein 13	AKP13_HUMAN	isogroup05530	1	isotig09919	2000	ACAAATCTGGAGGCTTCTtCTCTGAGCTCcAAAgACCTCAGgaGGAGTCcACTTGCCAGCAATcAGTCCCTGGtCCTGCtCTCTGAGGAGCTCGaGCAAGGAGAAATCAGAGACTACAACCACCAGGTGCATCAGACATCACAGCCACAAGGATTTAACTTCTGTTCTTCTGCTGTTTCATCTCCACTGACCAAATCCATGTCTCTAATGTCAATTAGCAAACCAGTGCTCGACAGCACGCAATCGTTCGGCGGCTCCGTGGGCTCCTCCGTGCAGAGCATATCTGAAGAGAGCAGCAGTGTCCCTGCTGGCAAAGGTGTAACAAAAGTCAGCCGCACCTTCAGCTACCTCAGGAATAAAATGTCCAGCAGCAAGAAGAGCAAAGAAAAAGAGAAAGAT…	activation of MAPK activity by adrenergic receptor signaling pathway [GO:0071883]; adrenergic receptor signaling pathway [GO:0071875]; adrenergic receptor signaling pathway involved in heart process [GO:0086023]; bone development [GO:0060348]; cardiac muscle cell differentiation [GO:0055007]; G-protein coupled receptor signaling pathway [GO:0007186]; heart development [GO:0007507]; intracellular …	ann.char.bf
Homeobox protein AKR	AKR_CHICK	isogroup07161	1	isotig11550	1567	TTTATGTAGTAAAGAGAAAAAaGACGTTAAACTATAAaCTATCCTGTATTGCCCAGGAAACTGGTTGATATTTAAACAAGGACAAACTTAAATGAGGTAATTCATGTTATGTCTGTCGACACAGTCAGTTGAACAAGGAAAaTCAGTAACTATTTGTGGGAGGAGTGGCTCTCTTCAGAGAGAAAAGGTTTtCcTGTTGTTAATTAACcTAAGCTAGGGAACAATAGCCAATAGGTTAATGTGTGTGCAcAGAGTTAAAaGCTAAACCCTAGTTTGGACTTCAGATGTCCCGGGGCTTTCTGTAACAGGAGCAGGGAGTTGCATGTCAGAACTTGTCACTAGGTCTCTGTTTCGTTGTGCAGCGAAGGAAACTGCTTGGAGGGATCCATTAATCTCACC…	negative regulation of transcription, DNA-templated [GO:0045892]; transcription, DNA-templated [GO:0006351]	ann.char.bf
AKT kinase-transforming protein	AKT_MLVAT	isogroup11888	1	isotig16277	901	GCGATGTTACCATTGTGAAGGAAGGCTGGGTACAGAAGAGGGGAGAATATATAAAAAaCTGGCGGCCAAGATACTTCCTGCTGAAGACAGATGGCTCTTTCATAGGCTATAAGGAGAAGCCCCAGGATGTGgATCTGCcATATCCACTCAACAACTTTtCAGtGGCAAAaTGTCAGCTGATGAAAACAGAGCGACCAAAGCCAAACACATTCATTATCAGATGTCTTCAGTGGACCACTGTCATAGAGAGGACGTTCCACGTAGACACTCCAGAGGAGCGGGAAGAATGGACAGAAGCAATCCAGGCTGTAGCAGACAGACTTCAGAGGCAAGAAGAGGAGAGGATGAACTGTAGTCCAACTTCTCAGATAGACAATATAGGAGAAGAAGAGATGGATG…	response to growth hormone [GO:0060416]; response to insulin-like growth factor stimulus [GO:1990418]; viral process [GO:0016032]	ann.char.bf
RAC-alpha serine/threonine-protein kinase	AKT1_HUMAN	isogroup03632	1	isotig08021	3006	GGAGTtCAGGAATTtCGGAAGAGTGATCTTTTGCcATAAACTGGTTTTTCAAGAGACATTCCTGCCATTATGAATGAAGTAGCGATAGTGAAGGAAGGCTGGCTTCACAAACGAGGAGAATACATCAAGACATGGAGGCCACGGTATTTTCTGTTGAAGAATGATGGCACCTTCATCGGCTACAAGGAACGGCCACAGGATGTTGACCAGCGGGAATCACCTTTAAATAACTTCTCAGTAGCTCAGTGCCAGCTGATGAAGACAGAGCGACCTAAACCAAACACATTTATCATTAGATGCCTCCAGTGGACCACAGTAATTGAAAGAACATTTCATGTGGAGACTCCAGAGGAGCGGGAAGAATGGACAAAAGCCATCCAAACAGTAGCAGACAGCCTC…	activation-induced cell death of T cells [GO:0006924]; aging [GO:0007568]; anoikis [GO:0043276]; apoptotic mitochondrial changes [GO:0008637]; cell differentiation [GO:0030154]; cell projection organization [GO:0030030]; cell proliferation [GO:0008283]; cellular protein modification process [GO:0006464]; cellular response to cadmium ion [GO:0071276]; cellular response to DNA damage stimulus [GO:0…	ann.char.bf
RAC-beta serine/threonine-protein kinase	AKT2_MOUSE	isogroup16340	1	isotig20729	507	CTGAAAAAaGATCCTAAACTCAGGCTGGGCGGGGgCCCGGGCGACGCCcGCGAGGTGATGGAGCATCGCTTCTTCTGCGGCATCGACTGGCAGGACGTGGTGCAGAGGAAGCTGGTGCCGCCCTTCCGGCCGCAGGTGACGTCGGAGGTGGACACCAGGTACTTCGACGAGGAGTTCACGGCGCAGAGCATCACGGTGACGCCGCCCGAGAGATGTGAGCACCTGGATTCCCCcGAGCGCGACcACcGgACGCATTtCCCGCAGTTCTCCTACTCGGCCAGCATCCGGGAGTGACACACCTGGGCACACCTGGGGACAcCTGGAAACACCTGGCACACCTGGggATACCTGGGATACACCTGGgTaCACCTGgatACACCTGGgAtACACCTGagACAC…	activation of GTPase activity [GO:0090630]; carbohydrate transport [GO:0008643]; cellular response to high light intensity [GO:0071486]; cellular response to insulin stimulus [GO:0032869]; glucose metabolic process [GO:0006006]; glycogen biosynthetic process [GO:0005978]; insulin receptor signaling pathway [GO:0008286]; intracellular protein transmembrane transport [GO:0065002]; intracellular sig…	ann.char.bf
RAC-gamma serine/threonine-protein kinase	AKT3_HUMAN	isogroup02891	1	isotig07280	4047	AACTATGAAAaCATTCTGTGGTACTCCAGAATACCTGGCACCCGAGGTGTTAGAAGATAATGACTATGGTCGTGCAGTGGACTGGTGGGGATTAGgTGTTGTCATGTATGAGATGATGTGTGGAaGATTACCCTTCTACAACCAAGATCATGAGAAACTCTTTGAACTGATACTAATGGAGGACATAAAGTTtCCTCGAACTCTgTCTGCAGATGCAAAATCATTaTTATCAGGCCTACTGATAAAgGATCCAAATAaGAGACTTGGTGGAGGCCCAGACGATGCAAAAGAAATCATGCGTCATAGTTTCTTtGCTGGAGTAAACTGGCAAGATGTGTATGATAAAAAGCTTGTACCTCcTTTtAAACCTCAAGTGACATCTGAGACAGACACCAGGTA…	brain morphogenesis [GO:0048854]; homeostasis of number of cells within a tissue [GO:0048873]; intracellular signal transduction [GO:0035556]; mitochondrial genome maintenance [GO:0000002]; peptidyl-serine phosphorylation [GO:0018105]; positive regulation of cell size [GO:0045793]; positive regulation of TOR signaling [GO:0032008]; protein phosphorylation [GO:0006468]; signal transduction [GO:000…	ann.char.bf
AKT-interacting protein	AKTIP_CHICK	isogroup05794	1	isotig10183	1912	GgAATACACGTTATGAACCCTTtCTGGAGCATGTCTACAGGTTCTGTGCGCAAGAGATCTGACACTGAAGAGAAGACATTGAGTGGAGAGCTTCGAACCAGTCCCCTGCGAGCCTCTGCAAAGAAACAGTTGCCTTCTATCCCAAAGAATGCTGTGCCAATAACCAAGCCTGCTTCACCTGCCAGCTCCTCCCAGTCCACCAATGGAACACATGCTTCCTATGGGCCTTTTTATTTGGAGTACTCACTACTTGCAGAATTTACCTTgGTGGTGAAGCAGAAGTTGCCAGGTGTCTACGTGCAGCCCTCATACCGATCAGCTTTAATGTGGTTTGGTGTAATATTCATAAGACATGGGCTCTACCAAGATGGTGTGTTTAAATTCACTGTCTATATTCCT…	apoptotic process [GO:0006915]; early endosome to late endosome transport [GO:0045022]; endosome organization [GO:0007032]; endosome to lysosome transport [GO:0008333]; lysosome organization [GO:0007040]; protein transport [GO:0015031]	ann.char.bf
ARL14 effector protein	AL14E_BOVIN	isogroup04792	1	isotig09181	2282	TTGATTTTAaTGCTTTCCctAGGGTGACCTTCACAGAAACTCCTGAAGGCTTCAAAGAACCcATTTTAGGCAAAaTAAAGGAAATAAGTTGTTCTGATgAAGTAAAATGGATCCTTGTTCAGTTGGGGTTCAGCTTCAAGCTACCAACGAATGCCACAAGACCTACTACACCCGTCACACTGGCTTCAAGACTAAACAGGATATATCTTCATCTGACCTCCTGCTGCTGCAGCTgAGGACTGGCATAACTCTGTCAGAGAGCAACACAATCTGCTTCCACCATGCAAAAATTTACATTGAGAGATTCGAAGACTTACAGAAATCCTGTTGTGATCCCTTTAACATCCACAGAAAACTATCCAAGAAAAACCTGCGAGCAATTGACTTAGATGATGCAGC…		ann.char
Retinal dehydrogenase 1	AL1A1_CHICK	isogroup05173	1	isotig09562	2126	AGTCAGGGCAAAAaTCACTGTATTCCCTTTATACCTCTTTTCACCTGCGTTTCAGGAACATCCTCAAACTTCTCAACTGAAAGCATGAAGAAGCAAGGCGCAGACGGCAACCCTGCTCCAGCTATGCCAGCACTGCCAGAGCCATTAAAAGACCTGAAAATTAAGTACACCAAGATCTTTATAAACAATGAATGGCATGATTCAATCAGTGGTAAAAAATTTGCAGTCTTTAACCCAGCTACTGAAGAGAAAATCTGTGAGGTTGAAGAAGGTGACAAGGCGGATGTGGACGAGGCAGTCAAAGCAGCTAGAAAGGCTTTTGAGCTGGGCTCAACCTGGCGCACGATGGACGCCTCAGAGCGAGGAAGGCTCTTGAATAAACTGGCTGACTTAGTCGAA…	oxidation-reduction process [GO:0055114]; retinoid metabolic process [GO:0001523]; retinol metabolic process [GO:0042572]	ann.char.bf
Retinal dehydrogenase 2	AL1A2_CHICK	isogroup14144	1	isotig18533	698	GGGGgAAAGGGGCTGGgAaGAAaGGgaTtCTtCATtGAACcTACAGTGTTTtCcAATGTGACAGATGACATGCGgATtGCCAAGGAGgAGATTTTTGGGCCTGTTCAAGAAATACTGAGATTTAAAaCCATGGATGAAGTTATAGAGAGAGCCAaCAATTCTGATTTTGGTCTGGTAGCTGCTGTCTTTACAAATGACATAAACAAGGCCCTGACAGTCTCTTCAGCAATGCAGGCTGGGACAGTCTGGATAAATTGCTACAATGCCTTAAATGCCCAAAGTCCTTTtGGAGGATTCAAAATGTCTGGCAATGGgAGAGAGATGGGTGAATGTGGATTGAGAGAaTATTCTGAaGTTAAAACTGTGACAATAAAGATCCCTCAGAAGAACTCCTAAAAT…	9-cis-retinoic acid biosynthetic process [GO:0042904]; anterior/posterior pattern specification [GO:0009952]; blood vessel development [GO:0001568]; cardiac muscle tissue development [GO:0048738]; cellular response to retinoic acid [GO:0071300]; embryonic camera-type eye development [GO:0031076]; embryonic digestive tract development [GO:0048566]; embryonic forelimb morphogenesis [GO:0035115]; fa…	ann.char.bf
Aldehyde dehydrogenase family 1 member A3	AL1A3_HUMAN	isogroup09034	1	isotig13423	1241	GGCTAAGTTGGAGTGTGGAGGTCTTGCCATTGAAGATAGAGgCCTGTTTATAAAACCCACGGTGTTTTCAGAGGTCACTGACAACATGAGAaTTGCCAAAGAAGAGATTTTTGGGCCAGTTCAGCCAATTATGAAGTTCAAGAGTATAGAAGAgGTTATAAGAAGAGCCAACAGCACCGAGTACGGACTCACAGCCGCcGTGTTCACCAAGAACCTGGACAGGGCcTTAACCCTGGCTTCAGCTCTGCAGTCAGGGACAGTCTGGATCAACTGTTACAATGCGCTCTATGCTCAGGCTCCTTTTGGTGGCTTTAAAATGTCAGGCAATGGCAGAGAACTTGGGGAATATGCTTtGGCAGAATACACCGAAGTGAAAACAGTCACCATCAAACTCTCCCA…	embryonic camera-type eye development [GO:0031076]; embryonic eye morphogenesis [GO:0048048]; face development [GO:0060324]; Harderian gland development [GO:0070384]; inner ear morphogenesis [GO:0042472]; locomotory behavior [GO:0007626]; neuromuscular process controlling balance [GO:0050885]; nucleus accumbens development [GO:0021768]; olfactory pit development [GO:0060166]; optic cup morphogene…	ann.char.bf
Mitochondrial 10-formyltetrahydrofolate dehydrogenase	AL1L2_HUMAN	isogroup02563	1	isotig06952	5470	GtgcGCTGCGGACCATCTGCACCACGGCCGCGGCTTATCAACATAAGCTGAAGCTAGCCCTTATAGGTCAAAGTATTTTTGGACAaGAAGTTTATAACAACCTGAGAAAAGAGGGACATAAAGTTGTGGGCGTCTTCACTGTGCCTGACAAGAATGGACAAGCAGATCCTTTGGCACTGGCAGCAGAGAAGGATGGCACTCCTGTTTTTAAGTTCCCCAAATGGAGAGCTAAAGGCAAATCCATCGAGGATGTAGTTGCAGCCTACAAATCAGTTGGTGCAGACTTGAATGTCCTTCCATTCTGTAGCCAGTTTATCCCCATGGATGTTATCAACTGCCCAAAACATGGCTCTATTATTTACCATCCATCCATCCTGCCACGCCACCGAGGAGCTTCTG…	10-formyltetrahydrofolate catabolic process [GO:0009258]; biosynthetic process [GO:0009058]; folic acid metabolic process [GO:0046655]; one-carbon metabolic process [GO:0006730]	ann.char.bf
Arachidonate 5-lipoxygenase-activating protein	AL5AP_HUMAN	isogroup10780	1	isotig15169	1015	CTTCTGTGCTCGTAGGACTGAGCTGCCACCGAGGCTGCACCcTCCACCCTGACAGGgAGCCcACTCTCAGAATGGACCAGGAGACCcTGGGgAGCATTGTCCTGCTTGCCATCGTCACCCTGATCAGTGTTGTCCAGAACGCTTTTTTtGCCAACAAAGTGGAGCATGAAAGCAGACACTGCAATGGGAAGGGgTTGCAGCGGCAGGgATCCTCCTACTTCGACCGTGTCTACACTGCCAACCAGAACTGCGGACACGCCTACCCGACGTTCCTCGCTGTGCTTTGGTGTGCTGGCCTTCTCTGCAGCCAAGCTCCTGCTGCCTTTGCTGGCCTGATGTACTTGTTTGTGAGGCAGAAGTATTTtGTGGGCTACCTCGGGGAGAGGACTCAGAGCACTC…	cellular response to calcium ion [GO:0071277]; leukotriene biosynthetic process [GO:0019370]; leukotriene metabolic process [GO:0006691]; lipoxin metabolic process [GO:2001300]; lipoxygenase pathway [GO:0019372]; protein homotrimerization [GO:0070207]	ann.char.bf
Alpha-aminoadipic semialdehyde dehydrogenase	AL7A1_BOVIN	isogroup05805	1	isotig10194	1910	CTGCAGGAGGAGAACCCGGGCGTGTACAACGGGCGCTGGGGCGGCCGCGGGCAGGTGGTGACCACGTACTGCCCcGCCAACAACGAGCCcATcGCCAGCGTCCGGCAGGGTAATTTGgAGGATTATGAAGAAACAGTAAAGAAGGCTAAAGAGGCATGGAAGGTCTGGGCTGATATCCCTGCACCTAAACGTGGAGAAATAGTGCGACAGATTGGTGATGCCCTGAGACAGAAAATCAAAGTCCTAGGAAGTCTGGTCTCTTTGGAAATGGGAAAGATTTTTGTCGAGGGTGTTGGAGAAGTGCAGGAATATGTTGATGTCTGTGACTATGCTGTTGGTTTGTCCCGAATGATTGGTGGTCCTATTTTACCTTCAGAAAGACCTGGCCATGCCCTTATA…	glycine betaine biosynthetic process from choline [GO:0019285]	ann.char.bf
Aldehyde dehydrogenase family 8 member A1	AL8A1_BOVIN	isogroup00498	3	isotig02839	2211	GCTCATTGAAAAAaTCACAGGTGAAGCAAGCAGCCAgCAATGGCTCACTCAAAGACTCTGTTAGTGCTGGAAAACTTCATAGGTGGCAAATTTGTTCCTTGTTCCTCCTACATAGACTCCTATAATCCATCCACtGGAGATGTCTATTGCAGGGTTCCAGACAGTGGCAAAGAAGAGGTGGAAGCTGCTGTCAAAGCTGCCAAAGAAGCCTTCCCAATTTGGTCCTCAAAAAGTCCATTGGAAAGATCTCAGATACTGAACAAATTGGCAGACCTGATTGAACATGACCTGGAAGCATTTGCACAAGCAGAGTCAAAGGATCAGGGAAAAACTATTACGTTTGCCAGAACAGTGGACATCCCTCGGGCCGTGCACAACTTCCGATTCTTTGCCTCTTCC…	retinal metabolic process [GO:0042574]; retinoic acid metabolic process [GO:0042573]	ann.char.bf
Aldehyde dehydrogenase family 8 member A1	AL8A1_BOVIN	isogroup00498	3	isotig02840	2212	GCTCATTGAAAAAaTCACAGGTGAAGCAAGCAGCCAgCAATGGCTCACTCAAAGACTCTGTTAGTGCTGGAAAACTTCATAGGTGGCAAATTTGTTCCTTGTTCCTCCTACATAGACTCCTATAATCCATCCACtGGAGATGTCTATTGCAGGGTTCCAGACAGTGGCAAAGAAGAGGTGGAAGCTGCTGTCAAAGCTGCCAAAGAAGCCTTCCCAATTTGGTCCTCAAAAAGTCCATTGGAAAGATCTCAGATACTGAACAAATTGGCAGACCTGATTGAACATGACCTGGAAGCATTTGCACAAGCAGAGTCAAAGGATCAGGGAAAAACTATTACGTTTGCCAGAACAGTGGACATCCCTCGGGCCGTGCACAACTTCCGATTCTTTGCCTCTTCC…	retinal metabolic process [GO:0042574]; retinoic acid metabolic process [GO:0042573]	ann.char.bf
Aldehyde dehydrogenase family 8 member A1	AL8A1_BOVIN	isogroup00498	3	isotig02838	2228	GCTCATTGAAAAAaTCACAGGTGAAGCAAGCAGCCAgCAATGGCTCACTCAAAGACTCTGTTAGTGCTGGAAAACTTCATAGGTGGCAAATTTGTTCCTTGTTCCTCCTACATAGACTCCTATAATCCATCCACtGGAGATGTCTATTGCAGGGTTCCAGACAGTGGCAAAGAAGAGGTGGAAGCTGCTGTCAAAGCTGCCAAAGAAGCCTTCCCAATTTGGTCCTCAAAAAGTCCATTGGAAAGATCTCAGATACTGAACAAATTGGCAGACCTGATTGAACATGACCTGGAAGCATTTGCACAAGCAGAGTCAAAGGATCAGGGAAAAACTATTACGTTTGCCAGAACAGTGGACATCCCTCGGGCCGTGCACAACTTCCGATTCTTTGCCTCTTCC…	retinal metabolic process [GO:0042574]; retinoic acid metabolic process [GO:0042573]	ann.char.bf
4-trimethylaminobutyraldehyde dehydrogenase	AL9A1_BOVIN	isogroup05366	1	isotig09755	2054	GCCTTTAAaaTATGGAGTCAGATGTCGGGCATGGAGCGCTGCCGGGTGATGCTGGAGGCTGCCAGAATTATTCGGGAGCAGAGAGATGAAATTGCCACCATGGAGACCATCAACAATGGGAAATCCATCTTTGAAGCCAGAGTGGACATCGACGTATCCTGGCAGTGCCTGGAGTATTACGCAGGGCTGGCAGGATCTCTGGCGGGTGAACACATCCAGCTTCCCGGGGGATCCTTTGGGTACACTCGGAGAGAaCCACTTGGGGTGTGTGTTGGGATTGGAGCCTGGAATTACCCCTTCCAGATTGCCTGCTGGAAGTCTGGCCCGGCCTTGGCTTGTGGCAATGCGATGGTCTTCAAGCCTTCACCCTTCACCCCCATCTCTGCAGTGAGGTTGGCA…	carnitine biosynthetic process [GO:0045329]; cellular aldehyde metabolic process [GO:0006081]; neurotransmitter biosynthetic process [GO:0042136]; oxidation-reduction process [GO:0055114]	ann.char.bf
Alanine aminotransferase 2	ALAT2_HUMAN	isogroup02903	1	isotig07292	4040	ATCAACGAGAAGGCGAGCAGGgAGAAGATCCTGACGCTGGAGTCCATGAACCCGCAAGTGAAGGCGGTGGAATATGCGGTGCGCGGCCCCATCGTTCTGAAAGCCGGGGAGATCGAGAAGGAGCTGCGGAAGGGAATCAAAAAaCCTTTTACaGAAGTGATTAAAGCCAACATTGGAGATGCACATGCAATGGGACAGAGACCAATCACCTTCCTCCGTCAGGTGGTGGCCCTGTGTACATACCCAAACCTGTTGGACAGCCCCAGCTTTCCAGAAGATGCCAAAAAGCGTGCCAGGCGAATCTTGCAGGGCTGTGGAGGAAACAGCTTAGGATCCTACACTGCCAGTCAAGGTATAAATTGCATCCGTGAAGATGTTGCTTCATACATTGAAAGAAGA…	2-oxoglutarate metabolic process [GO:0006103]; cellular amino acid biosynthetic process [GO:0008652]; L-alanine catabolic process [GO:0042853]; L-alanine metabolic process [GO:0042851]	ann.char.bf
Alanine aminotransferase 2	ALAT2_XENTR	isogroup11963	1	isotig16352	895	AGGTGCAGAGCCGCGAGTGCATCGAGGCCGTCATCAAGTTCGCCTACGACGAGAAACTTttCCTCATGGCCGACGAGGTGTACCAGGACAACATCTACGCCGAGGGCTCGgCCTTCTACTCGTTCAAGAAGGTGCTGAAGGAGATGGGGCcGCCcTACgCCGaGGAGGTGGAGCTGGCCTCGTtCCACTCcATCTCCAAGGgATTCATGGgAGAGTGCGGCcTgCGGGgCGGATACATGGAGGTGGTGAACATGCACCCcGTGGTGAAGGCCGAGCTCGCCAAGCTGGTGTCGGTGCGTCTGTGCCCgCCcGTGCCcGGACAGATGATCCTGGACACCGTCGTGGACCCGCCCAGGCCCGGAGAGCCGTCCTacGAGAGATtCCAGGCTGAGAAGGAGG…	2-oxoglutarate metabolic process [GO:0006103]; biosynthetic process [GO:0009058]; L-alanine catabolic process [GO:0042853]; L-alanine metabolic process [GO:0042851]	ann.char.bf
Serum albumin	ALBU_CHICK	isogroup01452	2	isotig04863	2416	GCTAGCATTTTTGAGCAATTTTGCTCACACCATAATCTGAAACCATGAAGTGGTTAACATTAATTTCATTTATTTTTCTCCTGAGTTCTGCCAGATCCAGGAATCTGCAAAGGACTGCACGAGATGCGGACCACAAGAGCCCGATTGCCCACCGCTTCAACGACCTGAAGGAAGAGACATTCAAGGCAGTAACTATGATCACATTTGCCCAGTACCTGCAGAAGTGTTCCTACGATGGACTGTCTAAGCTGGTGAAGGATGTTGTTGATTTGGCACACAAGTGTGTGGCCAACGAGGATGCTCCCGAGTGCTCCAAGCCACTGCCCTCTGTTTTCCTGGATGAAATCTGCCAAGTGGACAAGCTCCGTGACTCGTACGGTGACATGGCTGACTGCTGTG…	cellular response to starvation [GO:0009267]; hemolysis by symbiont of host erythrocytes [GO:0019836]; maintenance of mitochondrion location [GO:0051659]; negative regulation of apoptotic process [GO:0043066]; response to virus [GO:0009615]; response to vitamin A [GO:0033189]; transport [GO:0006810]	ann.char.bf
Serum albumin	ALBU_CHICK	isogroup15425	1	isotig19814	585	gaTGAAaCaCTCCtGGATAaGtGCTgCAAgaCaGACAACCCtGCTGAGTGCTACGGAAATGCTGTAGGTGCAAAGCTTTGTTTGCAGATCCTACAATGCTTGCTTGGTCCCTGCCATGAAAGAATTGTGTTGAGAAGCTCCTACAGAAGAGCAGAcAGAAAGCTTTTAGAGATACTAATTGCAGGGGAAGTTAATGGTGGGAGATGAAGCAGTCCACAGCCCATGGCAAGGATACAGGGTTATCTCAGGTGACAGAGTAATTCCATTTGTCACATTCCAGTATTTCAGGCTAGTCTCACTGTCTGATGCCTCTGTATCTCCCATGTGATTCTGCTTGTCCTGAGGCTGACAATTAACAGCTCAGTTATTCTCTGAGCTCCACGGCCTACGCGGAGTACG…	cellular response to starvation [GO:0009267]; hemolysis by symbiont of host erythrocytes [GO:0019836]; maintenance of mitochondrion location [GO:0051659]; negative regulation of apoptotic process [GO:0043066]; response to virus [GO:0009615]; response to vitamin A [GO:0033189]; transport [GO:0006810]	ann.char.bf
Aldehyde dehydrogenase, mitochondrial	ALDH2_MESAU	isogroup01460	2	isotig04879	1919	ATAACAAGATTTtCATAAATAACGAATGGCACGATGCAGTCAGCAagAAAaCCTTCCCcACCATCAACCCAGCCACGGGAGAAGTCATCTGCCAGGTGGCTGAGGGCGATAAGGCAGATGTGGACAGGGCAGTGCAGGCAGCCAAGGCAGCATTCCAGCTGGGCTCTCCCTGGAGGAGGATGGATGCATCCCAgCGGGGgAgGCTGCTGAACCGTCTGGCCGACCTGATCGAGAGGGACCGCGCCTACCTGGCCGCCCTGGAAACTCTGGATAATGGCAAACCCTAcGCCATCTCCTACCTGGTGGATTTGGACATGGTGGTCAAATGTCTCAGATACTTTGCAGGCTGGTCAGATAAATTCCATGGCAAAACCATTCCTTTAGATGGAGATTTCTTCT…	ethanol catabolic process [GO:0006068]	ann.char.bf
Aldehyde dehydrogenase, mitochondrial	ALDH2_MESAU	isogroup01460	2	isotig04880	1790	ATAACAAGATTTtCATAAATAACGAATGGCACGATGCAGTCAGCAagAAAaCCTTCCCcACCATCAACCCAGCCACGGGAGAAGTCATCTGCCAGGTGGCTGAGGGCGATAAGGCAGATGTGGACAGGGCAGTGCAGGCAGCCAAGGCAGCATTCCAGCTGGGCTCTCCCTGGAGGAGGATGGATGCATCCCAgCGGGGgAgGCTGCTGAACCGTCTGGCCGACCTGATCGAGAGGGACCGCGCCTACCTGGCCGCCCTGGAAACTCTGGATAATGGCAAACCCTAcGCCATCTCCTACCTGGTGGATTTGGACATGGTGGTCAAATGTCTCAGATACTTTGCAGGCTGGTCAGATAAATTCCATGGCAAAACCATTCCTTTAGATGGAGATTTCTTCT…	ethanol catabolic process [GO:0006068]	ann.char.bf
Fructose-bisphosphate aldolase C	ALDOC_HUMAN	isogroup11859	1	isotig16248	904	GgCAGTCCGTGCTCGTCGCCGCCGCCCTACACGCCACCGCCACCATGACGCACCAACACCCCGCGCTGACGGCCGAGCAGAAGAAGGAGCTGTCGGACATCGCGCTGCGGATCGTGGCCCCGGGgAAGGGCATCCTGGCAGCCGATGAGTCCGTAGGGAGCATGGCCAAGCGCCTCAACCAGATTGGGGTGGAAAACACGGAGGAGAACCGCCGGCTGTACCGCCAGATCCTCTTCAGCGCCGACAGCCGGGTGAAGAAATGCATCGGGGGCGTCATCTTCTTCCACGAGACCATGTACCAGAAGGCTGATGACGGCACCCCCTTCGTCCAGATGATCAAGGACAAGGGCATCGTTGTGGGCATCAAGGTGGACAAGGGTGTTGTGCCTCTAGCCGGGA…	canonical glycolysis [GO:0061621]; epithelial cell differentiation [GO:0030855]; fructose 1,6-bisphosphate metabolic process [GO:0030388]; fructose metabolic process [GO:0006000]; gluconeogenesis [GO:0006094]; neutrophil degranulation [GO:0043312]	ann.char.bf
Aldose reductase	ALDR_RABIT	isogroup01731	2	isotig05422	1295	TtCCATGAGAAGCCCcTGGTGAAGGgAGCcTGCCAGAAGACCcTTGCCGACCTGAAGCTGGATTACCTGGATCTGTACCTCATGCATTGGCCTTTTGGCTTCAAGGCAGGAGAGGAGCTGTTCCCTGTAGATGACAAAGGCATGGCTATCCCcAGCAACACAGATATTCTGCAGACaTGGGAGGCCATGGAAGAGCTGGTGGATGCTGGGCTGGTAAAAAaCATTGGGATCTCCAACTTCAACCGTGAGCAGATTGAAAGAATCCTGAACAAaCCAGGACTGAAGCACAAACCTGCAAATAATCAGATTGAGTGTCATCCATACCTTTCCCAGGAGAAGCTGATTGACTACTGCCACTCCAAAGGGATCACTGTGACAGCATACTGTCCCCTTGGACGT…		ann.char
Aldose reductase	ALDR_RABIT	isogroup01731	2	isotig05421	1287	TtCCATGAGAAGCCCcTGGTGAAGGgAGCcTGCCAGAAGACCcTTGCCGACCTGAAGCTGGATTACCTGGATCTGTACCTCATGCATTGGCCTTTTGGCTTCAAGGCAGGAGAGGAGCTGTTCCCTGTAGATGACAAAGGCATGGCTATCCCcAGCAACACAGATATTCTGCAGACaTGGGAGGCCATGGAAGAGCTGGTGGATGCTGGGCTGGTAAAAAaCATTGGGATCTCCAACTTCAACCGTGAGCAGATTGAAAGAATCCTGAACAAaCCAGGACTGAAGCACAAACCTGCAAATAATCAGATTGAGTGTCATCCATACCTTTCCCAGGAGAAGCTGATTGACTACTGCCACTCCAAAGGGATCACTGTGACAGCATACTGTCCCCTTGGACGT…		ann.char
Chitobiosyldiphosphodolichol beta-mannosyltransferase	ALG1_HUMAN	isogroup02226	2	isotig06411	673	AGTGTGAGATAGACTGTGGAAAGGGAGGCTGACTCTGCTTGACTTGTGAAGGAAAACATTTGGTTGCAAAGTGGAATTGTGCCTATAGCAGCAGGCAAGAGGCAAAAaTGGCCTGCCCTGTCCTGGTATTTCTGTAATGCAATGATTCTATTTCTAGCcAAGTTGAGCAGCAAATCTGAAGCCAAATGTGTGGAAGTTGGTGCCAGTTAAGCAGAGTGTTCCCTGCTGTTGCTGGCTGTGTGTGCAGCTCTTGCTCAGAAGTTGTGTTTCCATAGTACAGAGCTGTCAGTGCTGCTGCTGACAGATCAGCCTTCACCGAGAGGgACAGCAGCAGTGGgACTGTGCTGAAGGCCAGGGCCAGGCCAGCCCTCCTCATCAGCAGCACCAGCTGGACAGAGG…	dolichol-linked oligosaccharide biosynthetic process [GO:0006488]; protein glycosylation [GO:0006486]	ann.char.bf
Chitobiosyldiphosphodolichol beta-mannosyltransferase	ALG1_HUMAN	isogroup02226	2	isotig06412	562	ATAACCTGTGTGTCACTGATGCCATGAAAAAAGATCTCTGGGTGAATTTCAAGATAAAGGCTGTAACATTGTATGaCAAACCAGCGTCTTATTTTAAGGAAACACCATTAGACCTCCAGCACAGCTTGTACATGAAACTTGCcAAGGACTACGAGCCTTTCAGACCACGAGCTGTCAGTGCTGCTGCTGACAGATCAGCCTTCACCGAGAGGgACAGCAGCAGTGGgACTGTGCTGAAGGCCAGGGCCAGGCCAGCCCTCCTCATCAGCAGCACCAGCTGGACAGAGGATGAAGACTTTTCAGTGCTTTTAAGAGCTTTAGAAGACTATGAGAGGTTTATCAAGGAGGGAGCCAAGCTTCCAGCTTTAGTGTGTGTGATAACAGGgAAAGGACCTTTGA…	dolichol-linked oligosaccharide biosynthetic process [GO:0006488]; protein glycosylation [GO:0006486]	ann.char.bf
GDP-Man:Man(3)GlcNAc(2)-PP-Dol alpha-1,2-mannosyltransferase	ALG11_HUMAN	isogroup09107	1	isotig13496	1232	TTACACCGGTGAtAGAGATGCCACTGGAGAAGAAATAGtAGAAGGTGCTTtCAGAAGATTCAATATTAAGTTAaTCCATCCTGTGAAGTTTGTATTTCTAGAAAAaCGCTTtCTTGTGGAAGCTtCTCTTTATCCTCACTTCACTTTGCTGGGACAAAGTTTAGGaTCAGTGTTCCTTGGCTGGgAAGCTCTTCTCAAGTGCGTTCCTGACATTTATATTGACTCAATGGGTTATGCCTTCACAATTCCCCTCTTCAaGTACCTGGgAGGTTGTCGGgTTGgATGCTACGTCCATTATCCCACCATCAGCACCGATATGCTCTCTGTCGTGAGGAAcCAGGATACCAGGTTTAACAATGCTGCCTTCATAACAAGCAGTCCTCTCTTCAGCAAATTTAA…	oligosaccharide-lipid intermediate biosynthetic process [GO:0006490]; protein glycosylation in endoplasmic reticulum [GO:0033577]	ann.char.bf
Dol-P-Man:Man(7)GlcNAc(2)-PP-Dol alpha-1,6-mannosyltransferase	ALG12_HUMAN	isogroup04225	1	isotig08614	2562	GCGGGGCGGCCACGTGGGCGCGCGCGAATATATCTGAATTTCAAACCCGAGATGGCTCAGAAGAGGAGCTCAAGTGGGCGGTCATTCCCATTGCTGCTGCTGCTTATTGTGGTGGCCTTTGTTCATTTAACTGTCTGTCCTTTTACAAAAGTGGAGGAAAGCTTTAACCTACAAGCTATCCATGATGTGGTGTACCACCAGCTGGACTTGGATAAGTATGATCATCATGAATTTCCTGGAGTTGTCCCAAGAACGTTCCTTGGACCAATTTTTATTGCTGCTCTTTCCAGCCCAGCTATCTACGTACTTTCTGTGCTAAGAATGTCCAAGTTTTATTCCCAGTTGATAGTCCGAGGAAGTTTGGGGCTCAGTGTGATTTACACGTTATGGAAGCTGCAG…	dolichol-linked oligosaccharide biosynthetic process [GO:0006488]; protein folding [GO:0006457]; protein N-linked glycosylation [GO:0006487]	ann.char.bf
UDP-N-acetylglucosamine transferase subunit ALG14 homolog	ALG14_RAT	isogroup11904	1	isotig16293	900	GGGGCGgTGCCACTGCCGCTTCCGCGAGAGGTGGCCTCCGCCGCGCATGGAGGAGCTGCCCGTCGTCGTTCTCCTGCTCCTCCTCCTCTCCTTACTGCTTGTCCCGTTGGTGCTTCTGGGCAGGAGGCCCCGCGGTCGGCGGACGCCTCCGTTCAGTCTACTAGTGGTGGCCGGCTCTGGTGGGCACACAACAGAAATCCTGAGGTTACTTAGCTGTTTGTCAGAGTCATACTCTCCTAGACATTATGTTTTGGCAGACTCAGATAAGATGAGTGAAGCTAAAATACGTTCTTTTGAACAAAAAAGGGCTGAAACATTCTCCAAGTCCCAGTTCAGCCTTGATCGCATTCCCAGGAGCCGGGAGGTTAGACAGTCTTGGATCTCCTCTGTGCTAACAAC…	dolichol-linked oligosaccharide biosynthetic process [GO:0006488]	ann.char.bf
Alpha-1,3/1,6-mannosyltransferase ALG2	ALG2_HUMAN	isogroup13658	1	isotig18047	737	TGGCATGGcAGACTGCATCGTtGTGAACAGCAAGTTCaCTGCCAGCGTGTTCAAAGACACATTTAAGTCCCTGTCTCACATCAACCCAGATGTCCTCTACCcATCGCTCAACATCAGTAGCTTTGAAGAAATTGTTCCTGCAGACATAGCTGAtCTGATACCaAAAAAGAAAAGGTTCTTGTTTCTTTCCATTAATAGGTATGAGAGAAAAAaGAATCTAGCATTGGCTCTCGAAGCTTTGCACGAACTCCAAGGGAAACTTGATTCTCATGAGTGGGATGAAGTTCACCTGGTTATGGCAGGTGGTTATGATAAGCGAGTTCTGGAAAATGTGGAGCACTATGAGGAGCTGAGGAGACTTGCAGCCAAACTTGGTGTTAATGACCATGTAACTTTTTt…	dolichol-linked oligosaccharide biosynthetic process [GO:0006488]; protein glycosylation in endoplasmic reticulum [GO:0033577]; response to calcium ion [GO:0051592]	ann.char.bf
Dol-P-Man:Man(5)GlcNAc(2)-PP-Dol alpha-1,3-mannosyltransferase	ALG3_HUMAN	isogroup09316	1	isotig13705	1201	CTGGTCTACCCCGCCGGCTTCGTGTACATCTTCCTGgggCTGTACCACGCCACGGGCCGCGGCTCCGACATCCGCCTGGCGCAGTACCTGTtCGCCGGCcTCTACCTCCTCAACCTGCTCCTCGTCTTCCGCATCTACTGCCGAACCAGCAAGGTCCCTCCGTATGTTTTCTTCTTCATGTGCTGCGCCTCATACCGCATCCACTCCATCTTTGTCCTGCGGCTCTTTAATGACCCTGTGGCCATGGCCATCCTCTTCCTCGCCATCAACCTCTTCCTGGAGGAGCGCTGGTCCTGGGGCTGCCTCCTCTTCAGCCTGGCTGTGTCAGTGAAGATGAACATCCTGCTCTTCGCCCCTGGGCTCCTCTTCCTCCTCCTGCAACGGTTTGGTCTCCTGGGC…	dolichol-linked oligosaccharide biosynthetic process [GO:0006488]; protein glycosylation [GO:0006486]	ann.char.bf
Dolichyl-phosphate beta-glucosyltransferase	ALG5_HUMAN	isogroup05411	1	isotig09800	2030	GCGGCCCTCGCCGCCTTCCTCTTCGTCCTGATTTGTGCAATCGCTCATGTAaCTGCcAAAaCAATGCCACgCGATGATGCTGAGTACAGGAAAGGATCTGCACCAAGTATACATGATCCTGCTACAAGAGAACTgTCTGTCGTTGTGCCTTCGTACAATGAGGAAGACCGGTTACCCCtTATGATGGATGAAGCTTTGGGTTATCTAGAAAAAAGACAGAAAGAAGATCCTTCaTTCACTTACGAAGTGATAGTGGTTAATGATGGTAGTAAAGATCAAACTGCAACGGTTGCAAAGGAGTACAGCAAGAAATATGGGAGTGACAAAGTGCGAGTGATATCTTTGGAAAAAAATCGAGGGAAAGGGGGAGCAGTCAGGACGGGTGTCTTTAGTTCTCGG…	determination of left/right symmetry [GO:0007368]; protein glycosylation [GO:0006486]; protein N-linked glycosylation [GO:0006487]; protein N-linked glycosylation via asparagine [GO:0018279]	ann.char.bf
Dolichyl pyrophosphate Man9GlcNAc2 alpha-1,3-glucosyltransferase	ALG6_CHICK	isogroup01937	2	isotig05834	443	GgAGACTATGAGGCTCAGaGgCACTGGCAAGAAATCACCTACAACTTACCCATCAGGCAGTGGTACTTTAATACAAGTGACAACAACCTGCTGTACTGGGGCCTCGATTACCCACCTCTCACTGCCTATCACAGTTTtGTGTGTGCTTACATGTAAGTTCAGTGTTTtAAATCTTTtGTTACAGTTTtCTTTGTGGATATTCAGCTTTCCTACAAGCCACTGCTGGATGTGGGATGCCCAGGGAGAAGTGCTGTAGGAACAGGGGACATTGCCTGGGAAAGCTCTCaTGTGTGCAGAGCCCAAGTGACATTTGATGAGTGGAGATCATGTAAaTAGAaTTCTGTTATtGGAaTACTTTTTCCACAaGGGCTTTGCTGCtGTTGGAATGAGACTtATGGA…	oligosaccharide-lipid intermediate biosynthetic process [GO:0006490]; protein N-linked glycosylation [GO:0006487]	ann.char.bf
Dolichyl pyrophosphate Man9GlcNAc2 alpha-1,3-glucosyltransferase	ALG6_CHICK	isogroup01937	2	isotig05833	1509	GgAGACTATGAGGCTCAGaGgCACTGGCAAGAAATCACCTACAACTTACCCATCAGGCAGTGGTACTTTAATACAAGTGACAACAACCTGCTGTACTGGGGCCTCGATTACCCACCTCTCACTGCCTATCACAGTTTtGTGTGTGCTTACATTGCAAaGTtAaTAAaTCCTGaTTGGGTTGCTCTGCACACATCTCGGGGCTATGAGAGTCAGCCCCATAAGTTATTTATGCGTGCAACAGTGTTTGTTGCTGATTTGCTGGTTTATATCCCTGCAGTTATTTTATATTGTTTTTCCTTGAAAGAAACATCTGCTAAAAAAAAGGTTTCCAGTGCTCTCTGCATCTTGCTTTACCCAGGCCTCATCCTTATTGACCATGGGCACTTCCAatacaactca…	oligosaccharide-lipid intermediate biosynthetic process [GO:0006490]; protein N-linked glycosylation [GO:0006487]	ann.char.bf
Probable dolichyl pyrophosphate Glc1Man9GlcNAc2 alpha-1,3-glucosyltransferase	ALG8_MOUSE	isogroup06444	1	isotig10833	1731	CGTGTCCTTCCTCAAGTGCCTCCTCATCCCcGCCTATTACTCcACAGATTTTGAaGTgcAtAGGAACTGGCTTGCCATCACCcACAGCTTGCCCCTCTCTCAGTGgTACTTTGAGGCAACCTCAGAATGGACCCTGGATtATCCACcATTCTTTGCTTGGTTCGAATATGCACTTTCTCACATTGCCAAGTACTTtGACCCCcAGATGTTGGTTGTTGAAAACTTGAATTATGCCAGTCGTGCAaCCATCTTCTTCCAAAGGCTTTCTGTCATCCTtACAGATACCCTCTTCATATATGCaGTtCATGAGTGCTGCAGATGTATAAATGGAAAACGAGCTGCAAaGGATATCCTGGAAAAaCCAACATTTATTCTTGCTGTTCTGCTCTTGTGGAATTT…	oligosaccharide-lipid intermediate biosynthetic process [GO:0006490]; protein N-linked glycosylation [GO:0006487]	ann.char.bf
Alpha-1,2-mannosyltransferase ALG9	ALG9_HUMAN	isogroup01643	2	isotig05245	2099	TAAGAAGTTTGGGCTGCACGTGAGCAGGCTGATGCTGGCTTTCCTGGTGCTCAGCACAGGGATGTTCTGTGCTTCTGCAGCTTTCCTCCCcAGCAGTTTCTGCATGTACACcACGGTGGTGGCCATGACAGGCTGGTACATGGACAAAACCTCAGTGGCAGTGCTgggggTGGCTGCTGGAGCCCTGCTGGGCTGGCCCTTCAGTGCAGCTCTGGGggATtCCTATTGCCTTTGaCTtGTTGATCCTGAaGAAGAGGTGGAAAaGTTTCCTGAaCTGgTGTGTGGtGTCCTTGATCCTGTTTTTGGTGCCcTTGGTGGTGGtGGACAGCTATTACTATGGgAaGCTGGTGGTGGCACCTCTCAACATCGTTCTGTACAATGTCTTCACCCCCcACGGgC…	dolichol-linked oligosaccharide biosynthetic process [GO:0006488]; protein glycosylation [GO:0006486]	ann.char.bf
Alpha-1,2-mannosyltransferase ALG9	ALG9_HUMAN	isogroup01643	2	isotig05246	790	TAAGAAGTTTGGGCTGCACGTGAGCAGGCTGATGCTGGCTTTCCTGGTGCTCAGCACAGGGATGTTCTGTGCTTCTGCAGCTTTCCTCCCcAGCAGTTTCTGCATGTACACcACGGTGGTGGCCATGACAGGCTGGTACATGGACAAAACCTCAGTGGCAGTGCTgggggTGGCTGCTGGAGCCCTGCTGGGCTGGCCCTTCAGTGCAGCTCTGGGggATtCCTATTGCCTTTGaCTtGTTGATCCTGAaGAAGAGGTGGAAAaGTTTCCTGAaCTGgTGTGTGGtGTCCTTGATCCTGTTTTTGGTGCCcTTGGTGGTGGtGGACAGCTATTACTATGGgAaGCTGGTGGTGGCACCTCTCAACATCGTTCTGTACAATGTCTTCACCCCCcACGGgC…	dolichol-linked oligosaccharide biosynthetic process [GO:0006488]; protein glycosylation [GO:0006486]	ann.char.bf
Alkylated DNA repair protein alkB homolog 1	ALKB1_MOUSE	isogroup06540	1	isotig10929	1700	TTTATTTtCATACCAAACCCTTTCCTTCCGGGCTGCCAGCGTCACTGGGTGAAGCAGTGTCTCAAGCTGTACCCTGAGAAACCCAaTGTCTGCAACCTGGACCTGCACATGGCTCCTGAGAaGACCACTGACCTCTGGGGACAGAGTAAGGAGCAGCTGAGAAGGAAAGGTTCCAGTAAATGGGAGCCCAGGAGCCTATTGGAGAAGCTGCGCTGGGTGACCCTtGGTTACCATTATAACTGGGAGACTAAGAAGTACTCAGCAAATCACCACACTCCTTTCCCCTCAGACCTTGCATTCCTATCTGAACAAGTGGCTGCAGCTTGTGGGTTTCGGGGTTTCCAAGCCCAAGCAGGGATCTTGAACTACTATCATTTTGATTCTTCACTGGGAATTCAT…	cell differentiation [GO:0030154]; developmental growth [GO:0048589]; DNA dealkylation involved in DNA repair [GO:0006307]; DNA demethylation [GO:0080111]; DNA repair [GO:0006281]; in utero embryonic development [GO:0001701]; negative regulation of neuron apoptotic process [GO:0043524]; neuron migration [GO:0001764]; neuron projection development [GO:0031175]; oxidative demethylation [GO:0070989]…	ann.char.bf
Alpha-ketoglutarate-dependent dioxygenase alkB homolog 3	ALKB3_HUMAN	isogroup01662	2	isotig05283	1791	AGGTGTGATAGACAAGCCTGGTGTGTATGAGCTCAGCAAGGGACCAACTGGCATTTCTAGGATTCATTTGATTCCTGGCTTTATTGACTCAGAACAGGCAGACTGGATGTTTGAGCAGCTCCTCCAAGACATCCCCTGGGGTCAGCGAACTCACATCAGACAGGAAGTATCTTTTGAGGAACCACGaCTTACATCCTGGTATGGGGAACTTCCTTACACATACTCCAGGATAACAATGCAGCCAAATCCAAATTGGCATCCTGTGCTGACCATGCTGAAGGAGCGCATTGAGGAGTTCACTGGCTACACCTTCAACTCCCTTCTCTGCAACCTCTACCGAAAtGAGAAGGACAGTGTGGACTGGCACAGTGATGATGAGCCATCTCTGGGAAAAAATCC…	cell proliferation [GO:0008283]; DNA dealkylation involved in DNA repair [GO:0006307]; DNA repair [GO:0006281]; oxidative single-stranded DNA demethylation [GO:0035552]; oxidative single-stranded RNA demethylation [GO:0035553]	ann.char.bf
Alpha-ketoglutarate-dependent dioxygenase alkB homolog 3	ALKB3_HUMAN	isogroup01662	2	isotig05284	1032	AGGTGTGATAGACAAGCCTGGTGTGTATGAGCTCAGCAAGGGACCAACTGGCATTTCTAGGATTCATTTGATTCCTGGCTTTATTGACTCAGAACAGGCAGACTGGATGTTTGAGCAGCTCCTCCAAGACATCCCCTGGGGTCAGCGAACTCACATCAGACAGGAAGTATCTTTTGAGGAACCACGaCTTACATCCTGGTATGGGGAACTTCCTTACACATACTCCAGGATAACAATGCAGCCAAATCCAAATTGGCATCCTGTGCTGACCATGCTGAAGGAGCGCATTGAGGAGTTCACTGGCTACACCTTCAACTCCCTTCTCTGCAACCTCTACCGAAAtGAGAAGGACAGTGTGGACTGGCACAGTGATGATGAGCCATCTCTGGGAAAAAATCC…	cell proliferation [GO:0008283]; DNA dealkylation involved in DNA repair [GO:0006307]; DNA repair [GO:0006281]; oxidative single-stranded DNA demethylation [GO:0035552]; oxidative single-stranded RNA demethylation [GO:0035553]	ann.char.bf
RNA demethylase ALKBH5	ALKB5_HUMAN	isogroup11256	1	isotig15645	965	CCGAGggCTTTGTGAACAGTGCCGTCATCAACGACTACCAGCCGGGGGGCTGCATTGTCTCCCACGTGGACCCCATCCATATCTTTGAGAGGCCCATCGTCTCCGTGTCCTTCTTCAGCGACTCGGCGCTCTGCTTCGGGTGTAAATTCCAGTTCAAGCCCATCAGGGTGTCGGAGCCCGTCCTGTTCTTGCCCGTGAAGAGGGGGAGCGTCACGGTGCTCAGTGGGTATGCGGCCGACGAAATCACACACTGCATTCGACCACAGGACATCAAGGAGAGGAGAGCTGTCATCATCCTCAGAAAAACAAGACTAGATGCACCTCGATTGGAAACAAAATCCCTGAGTAGCTCTGTGTTGCCACCAGGTTATAACTCTGACCGCCTGTCAGGAAGCAACC…	cell differentiation [GO:0030154]; DNA dealkylation involved in DNA repair [GO:0006307]; mRNA export from nucleus [GO:0006406]; mRNA processing [GO:0006397]; oxidative single-stranded RNA demethylation [GO:0035553]; response to hypoxia [GO:0001666]; spermatogenesis [GO:0007283]	ann.char.bf
Alkylglycerol monooxygenase	ALKMO_HUMAN	isogroup01552	2	isotig05064	1632	GCTGGAGGAGGTGCCCGACTACGTGGAGAAGAGTATTCCATTCTTCATTACTTTtATTGGGCTGGAGTTTGCTGTCAGCTGGATTCAGAAGCGTAAGCTGCCGGGTCGGATCAATGATGGCATAAGTTCTCTTTCCTTAGGCATCCTGTCCCGACTACCAGATGTTTTATTCAGAAGTATTGAGTTAATTAGTTACATATACGTATGGAATAACTACAGACTGTTTGAACTGCCTTGGGACTCACCATGGACATGGTATTTGACACTTCTGGGAGTGGACTTTGCATACTACTGCTTTCATCGCATGAGCCATGAGGTTAATATACTGTGGGCTGCGCACCAAGTACACCATAGTTCAGAAGATTACAACTTATTCACAGCCTTGAGGCAATCTGTACT…	ether lipid metabolic process [GO:0046485]; membrane lipid metabolic process [GO:0006643]; triglyceride biosynthetic process [GO:0019432]	ann.char.bf
Alkylglycerol monooxygenase	ALKMO_HUMAN	isogroup01552	2	isotig05063	1635	GCTGGAGGAGGTGCCCGACTACGTGGAGAAGAGTATTCCATTCTTCATTACTTTtATTGGGCTGGAGTTTGCTGTCAGCTGGATTCAGAAGCGTAAGCTGCCGGGTCGGATCAATGATGGCATAAGTTCTCTTTCCTTAGGCATCCTGTCCCGACTACCAGATGTTTTATTCAGAAGTATTGAGTTAATTAGTTACATATACGTATGGAATAACTACAGACTGTTTGAACTGCCTTGGGACTCACCATGGACATGGTATTTGACACTTCTGGGAGTGGACTTTGCATACTACTGCTTTCATCGCATGAGCCATGAGGTTAATATACTGTGGGCTGCGCACCAAGTACACCATAGTTCAGAAGATTACAACTTATTCACAGCCTTGAGGCAATCTGTACT…	ether lipid metabolic process [GO:0046485]; membrane lipid metabolic process [GO:0006643]; triglyceride biosynthetic process [GO:0019432]	ann.char.bf
Insulin-like growth factor-binding protein complex acid labile subunit	ALS_RAT	isogroup10819	1	isotig15208	1014	AAaGCCCTGTGGCTGGACGGCAACAACTTCACGCTGCTGCCGGCCGCTGCCTtCAGGAATTTATCGGCGCTGGACTTCCTGGACCTGCAGAGCAGCCAGCTGGGCTCCGTGGAGCAGCACGCCTTCCACGGGCTGCGCAGCCTCTACCACCTGCACCTGGAGCGAAACCGCCTCAAGCACCTGGCGCCGCACACCTTCCTGCACACGCAGAACCTCGTGTCCCTCAGCCTCAACAACAACCACTTCAGCAAGGTGGAGGAAGGGCTCTTTGCCGGGCTCTCCAACCTCTGGTACCTGAACCTGGGCTGGAACTCGCTGGTGGTGCTGCCCGACAAGGTGTTCCACGACCTGCCCAACCTcAGGGAGCTGATCCTGGCCGGGAACAAGCTGCCCTACCTG…	aging [GO:0007568]; cell adhesion [GO:0007155]; signal transduction [GO:0007165]	ann.char.bf
Alsin	ALS2_MOUSE	isogroup07230	1	isotig11619	1551	GGTTGAaGATTACAACACCAGAAGAACAATTTGTtCTtGTTtCTTCAACACCACAGGAGAAGACCAAGTGGCTGAGGGCAATAAGCCAAGCAGTGGATCAGGCCCTTAGAGGGACTTCTGACATGATTCTGTATGGAGCTGGTGGGAACGTGCCAAGACAGGAACCTCCTATTTCTCGCAGTGCCAAATACACCTtCTACAAGGACCCTCGATTCAAGGATGCTGTTTATGATGGGAGGTGgCTTTCAGGAAAACCCCATGGAAGAGGGATCCTAAAATGGGCAGATGGACGAATGTACTCTGGGACttttcGGACTGGGCTGGAGGATGGGTATGGTGAATACAGAGTGCCTAACAAAGCACTGAaTAAaGAGGACCATTACGTGGGATACTGGAAGG…	axonogenesis [GO:0007409]; behavioral fear response [GO:0001662]; cell death [GO:0008219]; endosomal transport [GO:0016197]; endosome organization [GO:0007032]; in utero embryonic development [GO:0001701]; locomotory behavior [GO:0007626]; lysosomal transport [GO:0007041]; neuromuscular junction development [GO:0007528]; neuron projection morphogenesis [GO:0048812]; positive regulation of GTPase …	ann.char.bf
Alsin	ALS2_RAT	isogroup01924	2	isotig05807	1109	aCTgggAaTGCGttttacgcctaaacaaacaaactgacaTggCTCTTCTCAgctttCTtGgCGTGCAAGTGAAGTTTTGgCCGGGAaCTGTGTCCATCCTTGGAGAGAGTAGAAAGGTATCATCAAACACAAAGGATGCCTGCTTTGCCTCTGCTGTTGAATGTTTACAGCAAATCAGTACCACaTTTACCCCAACTGACAAGCTGAAGGTGATCCAGCAGACTTTTGAAGAGATCTCCCAGAGTGTACTTGAGACCCTTCAGGAAGATTTTCTGTGGTCCATGGATGACTTGTTTCCTGTTTTTCTCTATGTGGTGCTACGAGCCAGGATAAGGAATTTGGGGTCTGAGGTGCACTTAATCGAAGACTTGATGGATCCcTATCTCCAGCATGGGGAGC…	axonogenesis [GO:0007409]; behavioral fear response [GO:0001662]; cell death [GO:0008219]; endosomal transport [GO:0016197]; endosome organization [GO:0007032]; in utero embryonic development [GO:0001701]; locomotory behavior [GO:0007626]; neuromuscular junction development [GO:0007528]; neuron projection morphogenesis [GO:0048812]; positive regulation of GTPase activity [GO:0043547]; positive re…	ann.char.bf
Alpha-methylacyl-CoA racemase	AMACR_MOUSE	isogroup09097	1	isotig13486	1233	AGCCCTTCCGCCACGGTGTCATGGAAAGACTTGGGCTTGGCCCAGAAGTCCTTCTACAGGAGAATCCCAGACTCATCTATGCTAGACTTACTGGGTTTGGCCAGACAGGAAAATACGCCAAGTCTGCAGGTCATGACATCAATTACTTGGCTTTATCAGGTGTACTGTCAAAGCTGGGTAGGAAGAATGAAAATCCTTATGCACCAGTAAACCTTCTGGCTGATTTTGCTGGTGGAGGTGTCATGTGTGCTCTGGGCATTGTTACAGCCCTCTTTGAACGTGCCAGATCTGGCAGAGGGCAGGTCATTGATGCGAGTATGGTAGAAGGAGTAGCATAccTAAGTTCTTTCCTGTGGAAATCACAAAAAATGGgACTTTGGAGCCAAGCTCGAGGTGAAA…	bile acid biosynthetic process [GO:0006699]; bile acid metabolic process [GO:0008206]; fatty acid metabolic process [GO:0006631]; isoprenoid catabolic process [GO:0008300]	ann.char.bf
Peptidyl-glycine alpha-amidating monooxygenase	AMD_BOVIN	isogroup01791	2	isotig05541	1871	GGGgAGTCACGGCCACAGACCCCGGTGGTGTCGCTGCTGGCAGTGGGAGGGTAGGTCGGCCGGGAGTCGACAGTGTGGTGCGCCTTTCTCCCATtctgaagcatgactattgctggtttctgtgatgccacttgaagtctcccatgctgtggattaataagtaacgcgcaggtttaactgcagaacctgggaagaaagcatcaggagtgctagtccttttcagttccttaagtagatagcagtacagtgccatctgtctgcaagggaagattcttcaatagctttttacagctaataaaaaagacaacatagtgtcatccaCcTtCctgaTttacagtgcaTtgcTttCcAagacagatGATTTCCAAGAAGCTGGAGGATGCCCAGAGCGCATAATGA…	peptide metabolic process [GO:0006518]	ann.char.bf
Peptidyl-glycine alpha-amidating monooxygenase	AMD_HUMAN	isogroup01791	2	isotig05542	529	AaaCAGGAaGAGaTTttGgATCATGACACCAaGgATAGTGATGcAAGTTATTTTCTGCAGCAGGCCAAAAAaGAAGAGGCTGAGATTTtGGATCAGGGTGATTTCTATtCACTCCTTTCTAAGCTGCTAGGAGAAaGGGAAGATGTTGTGAATCTGCATAAGCATAACCCTACAGAAAAAGCAGAATCAGATCTTGTGGCaGAGATTGCTAATGTAGTTCAAAAGAAGGATCTTGCCAGAGAGATCACAAATCATGATGAAAGGGACAATACTATTCTtGTCAGAGACAGAATGCAGAAATTtCACAGACTAGAGTCTACCCTGAGGCCACCAGAGAACaGGCATTTCTCTTTACAACAGTCTAAGCTtGgTGaGGGAAGCTGGGAAAAAAaGCATAAa…	central nervous system development [GO:0007417]; heart development [GO:0007507]; lactation [GO:0007595]; limb development [GO:0060173]; long-chain fatty acid metabolic process [GO:0001676]; maternal process involved in female pregnancy [GO:0060135]; odontogenesis [GO:0042476]; ovulation cycle process [GO:0022602]; peptide amidation [GO:0001519]; protein amidation [GO:0018032]; protein homooligome…	ann.char.bf
Peptidyl-glycine alpha-amidating monooxygenase	AMD_RAT	isogroup00910	1	isotig03803	1374	GGCAaCGTTTAtGTCTCTGATGGCTACTGCAACAGTCGGATTATTCAGTTCTCTCCAAATGGACTGTATGTGATGCAGTGGGGAGAAGAGACTTCTCTAGGCAGATCCAGGCCTGGACAGTTTCGTATCCCCCACAGCTTAGCCCTGATCCCTGACTTAAGTCAGCTGTGCGTTGCAGACAGAGAAAATGGTCGAATTCAGTGCTTCAGGTTGGAGACTGCGGAGTTCACAAGAGAGATCAAACACAAAGCATTTGGAAGAGAGTTGTTTGCAGTTTCATATGTTCCAGGTGGTCTTCTCTTTGCAGTCAATGGAATGCCTTATCCTGGAGAGGCAGCATCAGTGCAAGGATTTGTGATGAACTTCTCTACTGGAGAAATAATTGATACTTTCATTCCA…	central nervous system development [GO:0007417]; heart development [GO:0007507]; lactation [GO:0007595]; limb development [GO:0060173]; long-chain fatty acid metabolic process [GO:0001676]; maternal process involved in female pregnancy [GO:0060135]; odontogenesis [GO:0042476]; ovulation cycle process [GO:0022602]; peptide amidation [GO:0001519]; peptide metabolic process [GO:0006518]; protein ami…	ann.char.bf
AMMECR1-like protein	AMERL_HUMAN	isogroup04177	1	isotig08566	2599	ACCAATGaCCCcTATCCACTCTTTGTGACGTGGAAGACGGGGCGAGACAAGCGGCTTCGTGGCTGCATCGGGACCTTTTCAGCCATGAATCTTCACTCAGGACTCAGGGAATACACATTAACCAGTGCACTTAAGGACAGCCGATTTCCCCCCCTGaCccGcGAGGAGCTGCCcAAaCTCTtCTGCTCTGTCTCCCTCCTCACTAACTTTGAGGATGCCAGTGACTACCTGGACTGGGAGGTTGGAATCCATGGGATCAGAATAGAGTTCATCAATGAGAAAGGTGTCAAACGCACAGCCACGTATTTACCTGAGGTTGCTAAGGAACAAGACTGGGATCAGATCCAGACCATAGACTCCTTACTCAGGAAAGGTGGCTTTAAGGCTCCCATTACCAAT…		ann.char
E3 ubiquitin-protein ligase AMFR	AMFR_HUMAN	isogroup03748	1	isotig08137	2927	GTGCTAGTGAACACTGCCTGCTGTTTtCTGATGCTGGTTGCTAAGCTAATCCAGTGTATGGTGTTTGGTCCTCTTCGTGTCAGTGAGAGGCAGCATCTCAAGGATAAATTCTGGAATTTCATTTTCTACAAGTTTATCTTCATTTTtGGTGTGCTGAATGTTCAGACAGTGGAAGAAGTAGTGATGTGGTGCCTCTGGTTCTCTGGGCTTGTGTTTCTCCATCTGATGGTTCAGCTCTGCAAGGATCGCTTTGAATATCTTTCCTTTTCTCCTACCACACCCATGAGCAGCCACGTCAGAGTGCTGGCCCTGCTCATAGCCATGCTTCTGTCCTGCTGTGGATTAGCAGTTGTCTGTGGAGTTGTTGGCTACACCCATGGCATGCACACATtGGCTTTC…	aging [GO:0007568]; endoplasmic reticulum mannose trimming [GO:1904380]; endoplasmic reticulum unfolded protein response [GO:0030968]; ERAD pathway [GO:0036503]; learning or memory [GO:0007611]; movement of cell or subcellular component [GO:0006928]; positive regulation of protein binding [GO:0032092]; protein autoubiquitination [GO:0051865]; protein folding [GO:0006457]; protein K48-linked ubiqu…	ann.char.bf
Amphoterin-induced protein 2	AMGO2_HUMAN	isogroup08549	1	isotig12938	1311	GgAaGCTTTtCCATgACTCCgAaCCTGAAGTATCTAGACTTGTCATCCAACaGCCTGAGAACACTGAGCAGCCCTGTGTTTCATGaGCTAAaGGCGCTGGAGGTTCTCcTGCTGTACAACAATCAAATAaCACACaTCGaGTCTTTAGCcTTtGGAGgATTGTACAAATtGCAgAAGCTGTACCTAaGCTACAACTTGGTCTCACATTTCCCACTGGACTTATATGTTGGAAAACATAAATTGACAGACCTTGtGTTGCTGGACATTTCcTTtAATCGCATCCAGACGATGCCTATTCAGCGCCTGAGTTCAGTGCCAGCCAAACAACTTAGTGgAATTTaTCTTCATGGCAACCCATTCTATtGTGACTGTGTCCTgTACTCCATGCTAATCTTCTGG…	heterophilic cell-cell adhesion via plasma membrane cell adhesion molecules [GO:0007157]; homophilic cell adhesion via plasma membrane adhesion molecules [GO:0007156]; negative regulation of apoptotic process [GO:0043066]; negative regulation of programmed cell death [GO:0043069]; positive regulation of synapse assembly [GO:0051965]	ann.char.bf
Amphoterin-induced protein 3	AMGO3_HUMAN	isogroup09346	1	isotig13735	1193	TGgTGCTGGTGATCATCTACCTGTACCTCACACCGTGCCGCTGCCTGGGCTGCTGCAGGAAGCCAGTCCCGCTGAGCCCCCCGCAGGAGTGCAGCGCCCAGTCCTCCATCCTCAGCACCACTCCCCCcGCCACCGACGCGCCAAaCCGCAAGGCCAGCGCCAACAAACACGTTGTGTTCCTCGAGCCCATCAGGGAGACACAGAaCGGCAAGATCCGCCTGGCCcTCGGCGAGGACTTCCCcGACCCcAaGCACCCcAaGGTCCTGCAGCTCAAGTCAGACTCAGAGTCCATCAGCTCTGTCTTTTCTGATACCCCCATTGTGTCCTAGTGGGAGAGAGCTGGGAaCAGAGCCGGGGCCTCCCAAGAACTGGTcGCCTCCTTCGCTGCTAGAACAGGAT…	heterophilic cell-cell adhesion via plasma membrane cell adhesion molecules [GO:0007157]; positive regulation of synapse assembly [GO:0051965]	ann.char.bf
AMME syndrome candidate gene 1 protein homolog	AMMR1_MOUSE	isogroup10525	1	isotig14914	1045	GGCTTTTCTGCTCAGTGTcTCtACTcACTAACTTTGAaGATGTGTGTGACTACATGGATTGGGAGGTGGGTGTACATGGCATTAGAATAGAATTCATCAACGAAAAAGGATCAAAGCGCACGGCCACCTACTTACCAGAGGTTGCAAAGGAGCAAGGATGGGACCACATTCAAACGATAGATTCCTTGTTGAGGAAAGGAGGCTACAAAGCTCCGATTACTAATGAATTCAGGAAAACAATAAAGCTAACCAGGTACCGCAGTGAGAAGATGACGATGAGCTACACAGAGTACCTTGCCCATCGTCAGCATCAtCACTTCCAGAATGGTATTGGGCACCCCCTtCCAGCATACAACCATTATTCCTGACACTGAGCCGCATGACCAGTCACTGGACCTC…		ann.char
Protein AMN1 homolog	AMN1_BOVIN	isogroup00502	3	isotig02851	2750	AAGGGCAAATAACTGaTACAAaTATCGGTGAGGTATTGCACCCTGCTGTGGAGTCTCTGGACCTCCGAGACTGTGATATTTCAGATAATGCGTTATTGCAGCTTTATAACTGCAAGCAGCTGAAAAAAATCAACTtAAaTTCTTGCAAGGAGAACAGATTtGGAATTACTTCAGAaGGTAACAGATGATGGCGTTGTAGCACTAGTGAGTGGAACATGTTCAAAGAATTTAAaGGAGATCCACATGGAGCGCTGTGTGAATCTGACAGACATCGCTGTGGAAGCTGTCCTTACTTGTTGTCCCAAGATACACATTTTTCTGTTCCATGGATGCCCACTGATAACAGATCGTTCCCGAGATGCTTTAGAGCAACTCATCATATCAAaCAAAaTCAAGCAA…		ann.char
Protein AMN1 homolog	AMN1_HUMAN	isogroup00502	3	isotig02850	2947	AATATCGGAGAGGTATTGCACCCTGCTGTGGAGTCTCTGGACCTCCGAGACTGTGATATTTCAGATAATGCGTTATTGCAGCTTTATAACTGCAAGCAGCTGAAAAAATCAaCTTAAATTCTTGCAAGGAGAACAGATTTGGAATTACTTCAGAaGGGgTCATAGCACTGGCcTTATCCTGTCCTTACCTGCGTGAaGCATCTTTCAAAAGGTGCTGTGATATAACTGACAGTGGAGTTCTAGCTCTTGCACTCAACTGCCAATTCCTACAAATAGTGAACCTGGGCAGCTGCTCAGGCATCATGGATGCATCTCTGCAGGCACTAGGAAAAAaCTGCAAATTTCTTCACAGTGTGGACTTCTCATCTACTCAGGTAACAGATGATGGCGTTGTAGCAC…		ann.char
Angiomotin	AMOT_HUMAN	isogroup05611	1	isotig10000	1971	GCGACCCTTACAAAAATTCCGGCTCCAgTGAGTTCTACAaGAACTCGGTGCAGCCCCCTtCCcAGCCCAGCATGAAAGGAATGGAGCAGCGGGGGCCTCCCCcGGAgTATCCCTACAAAAACGTGTCCACCCCGTCTATGAaCTGCAAAGCTCAGGACTCGGGGCACTTCTATAGTGACCATCGCATGAGCCAGCAGGGAAGAgCTGATGGGCCTATGATGAGGTATCAGCATCCCCCTGAGTATGGCTCAGTCAGGCAGAACCCAGATGTGCAGCTGCAGTTACAACAGAGACcACCTCACCACCACAGCCCGACTTCTTCcTTGACCTCCCTGGgATCTTtGACTTTGCtCCAGTCTCCACCACCCTCTAGGCTGTCCCCTtCCCAGCACCAGCAAC…	actin cytoskeleton organization [GO:0030036]; blood vessel endothelial cell migration [GO:0043534]; cell-cell junction assembly [GO:0007043]; cell migration involved in gastrulation [GO:0042074]; cellular protein localization [GO:0034613]; chemotaxis [GO:0006935]; establishment of cell polarity involved in ameboidal cell migration [GO:0003365]; gastrulation with mouth forming second [GO:0001702];…	ann.char.bf
Angiomotin	AMOT_HUMAN	isogroup10080	1	isotig14469	1088	GGTACCGCTATCCTCCTCCCAGCGACCGCGGGCAGGTCCTGGTTGACTCTGGGATTTTTtATTTTTTTttACCTCCTTCCAGCTCGGTTGCCTGTTCTGAAAGTATATTTATTTTTAATAAAAGTCGAGCCGCAAATCGAGTTCGTAGCACATTCCCcGTTCTGTGGAGTCCGGTTGATTTCTGCGGTTAAAAAAGTTTACTCCCCCTCCTCCAGTTTTATTGACACTGaGGATGAAGAAGGATTTGCAAaTGAAaGCGCCTTGAAaTACAGCATCTTTTGGAGAGAGCTCTGCAGTTCTCCAGCCCGTTAAaTCTCGAATTCCACCCTTTGCCCCTGCTGAATCCACTGTTCTGCCCTTtACTCTCTGGGgTAAAAAAaCCAAaCAaCAaCAACAAAa…	actin cytoskeleton organization [GO:0030036]; blood vessel endothelial cell migration [GO:0043534]; cell-cell junction assembly [GO:0007043]; cell migration involved in gastrulation [GO:0042074]; cellular protein localization [GO:0034613]; chemotaxis [GO:0006935]; establishment of cell polarity involved in ameboidal cell migration [GO:0003365]; gastrulation with mouth forming second [GO:0001702];…	ann.char.bf
Aminopeptidase B	AMPB_RAT	isogroup13584	1	isotig17973	745	ATGGACAGCACCGGGgAGCAGCACCcGCTCAACAGGCTGCGGGTGGTGATCGAGCCAGGTGTCAATCCGGATGACACGTACAATGAAACACCCTATGAGAAGGGgTACTGCTTCGTCAGCTACTTGGCCCATCTTGTGGGCAACCAGAGCAAGTTTGATGCCTTCCTCCAGGCCTACGTGAACCGGTTCAAGTTCCAGAGCATCACTGCAGATGACACCCTTGGGTTCTTCCTGGAGTACTTCCCCGAGCTGAAGGAGAAAGGCGTGGACTCCATCCCAGGGTTTGAATTTGACCGCTGGCTGAACACGCCGGGCTGGCCGCCCTACCTGCCTGACCTGTCGCCGGGgCAGCAGCTGATGAGGCCGGCGGATGAGCTGGCAGAGCTCTGGGCAGCTGAT…	aging [GO:0007568]; negative regulation of blood pressure [GO:0045776]; peptide catabolic process [GO:0043171]; protein processing [GO:0016485]; proteolysis [GO:0006508]; retina development in camera-type eye [GO:0060041]	ann.char.bf
AMP deaminase 1	AMPD1_HUMAN	isogroup09156	1	isotig13545	1225	atGccaagggcaaacaGCTCACCCTGAAACAGCttttccaaCAGCTCAaaCTGCAccccTATGACCTGACAGTggattccctggATGTccATGCTggcaggCAGACGttccAGCGCtttgaCAagttcaaTGAcaagtaCaaccccgtgggggccAGCGAGctgCGCgacctcTAccTgaaGACGGAGAACGCCATCAaCGGCGAGTATTTTGCTACCATCATCAAGGAGGTtGGCTCTGACCTGGAGGATGCCAAGTACCAGCACACAGAGCCCCGGCTCTCCATCTACGGGCGGTCACCTGAGGAGTGGGACAAGCTGGCCAAGTGGTTCAACACCCACCGGGTCTATTCCCCCAACATGAAGTGGATGATCCAAGTCCCCAGGATTTATGATGTGT…	IMP salvage [GO:0032264]; purine-containing compound salvage [GO:0043101]; response to organic substance [GO:0010033]	ann.char.bf
AMP deaminase 2	AMPD2_HUMAN	isogroup06517	1	isotig10906	1708	CGGACCTGGGCTTCGGGCTGAAGATGGTGGATGGTGTCGTGCACGTCTACACCAAGCAGGACATCACTGACAAGAGCACGGAGCTGGACCTGCCATACCCCGACCTGCAGGAGTTCATCGCCGACATGAATTTCCTCATGGCTTTGATCATCAATGGGCCCATCAAATCCTTCTGCTACCGCCGGCTGCAGTACCTGAGCAACAAGTTCCAGATGCACGTGCTGCTCAACGAGATGAAGGAGTTGGCAGCCCAGAAGAAGGTgCCTCACCGCGACTTCTACAACATCCGCAAGGTGGACACCCACATCCACGCCTCGTCCTGCATGAACCAGAAGCATCTCCTGCGCTTCATCAAGCGGGCGATGAAGAAGCACCTGGATGAAATCGTGCACGTGGAGA…	cyclic purine nucleotide metabolic process [GO:0052652]; energy homeostasis [GO:0097009]; IMP biosynthetic process [GO:0006188]; IMP salvage [GO:0032264]; purine-containing compound salvage [GO:0043101]	ann.char.bf
AMP deaminase 3	AMPD3_HUMAN	isogroup06104	1	isotig10493	1812	AGGAGGCCAAGGAGAGGGAGCTGCAGAAGGAGCTGGCAGAGCaGCAGTCTGTGGAAACAGCTAAAaGGAAGAAAAGTTTCAaGATGATTAGATCCCAGTCTTTGTCATTACAAATTCCACCTCAGGAATGGAAaGCACCACCGGCCAATCCCGTCCTGTCTCCTGCAACGCCAGTTCTCCCAAGTGCTTTTGTGCCAGTCCAAGTGCCATATGATGTACCAGAATTCCAGAGAGTTTCAATTAGTGGGgACTACTGTGCAGGGGTCACAGTTGATGACTATGAACAAGCTGCCAAGAGCCTGGTGAAAGCTCTTCTCATCCGAGAGAAGTACTCGCGCCTTGCCTACCATCGCTTCCCAAGAACTACATCTCAGTACCTGTGCAGCATGCGGGATCAAA…	ADP metabolic process [GO:0046031]; AMP catabolic process [GO:0006196]; ATP metabolic process [GO:0046034]; energy homeostasis [GO:0097009]; erythrocyte homeostasis [GO:0034101]; GTP metabolic process [GO:0046039]; IMP salvage [GO:0032264]; neutrophil degranulation [GO:0043312]; purine-containing compound salvage [GO:0043101]	ann.char.bf
Glutamyl aminopeptidase	AMPE_PIG	isogroup03080	1	isotig07469	3715	TTCTGTGTCAGTTCCCTCCGTGTCCCGGCCCAGCTGCACTTCTTTTGATATCTACATTGCCTCTAAATGCGTGTTGTCTTTAATTAATCGAGtGTCTCGTGGAAAGAGgTGCaGgAGAGAGGCAGAGAACAGCTAtAGCTACACAATTAAAaTACAAaCCAAGACTGCTGAGTGTACTGAAtGCACATGCTGAAGTGACTAATAAGCTTTTttATGGTTAATGTTTtGCCctGAGAGCAGACCTAGGAGCAGAGATGGAGGGCATGGATTTTGAGGATGAGAAGTCCAAGAGGTACTGCATGAAGACAAAGCACGTGGCCATCATCTGTGGAGTCGTGGTTGTTGTAGGACTTGCTGTGGGGCTTGGCGTGGGATTGAGCAGACCTAAACCTCCAAAGG…	angiotensin maturation [GO:0002003]; cell migration [GO:0016477]; cell proliferation [GO:0008283]; peptide catabolic process [GO:0043171]; proteolysis [GO:0006508]; regulation of blood pressure [GO:0008217]; regulation of systemic arterial blood pressure by renin-angiotensin [GO:0003081]	ann.char.bf
Amphiphysin	AMPH_CHICK	isogroup05421	1	isotig09810	2031	AAGAGGAATCATTaCTGGATTTGGACTTcGACCCTTTCAAGCCAGAAGCTGTATCaaCAGGAGTTAGTCATTCTCCCATGTCTCAGACATTGCCATGGGATCTATGGACGACCAGCAGCGAATTGGTGCAGCCGGCATCCACCATAGCATTTAATGGATTTGCACAGGATATCTCTGCATTTACAGTACAATCAAATGAGAATGTGGAAGAGCCTGTGGCTGAGGCTGAAGAAACTCCACcTGGGGAACCTAAGGTTGAGGAAGCCCcTGCTGCTGCTGCTGCTGTGGAAAAGGAGGCTGTCCCTGCTGAGCCAGCAGAGCAGGCTGTGGAAAGTGTtGAGGCAGGAGATAAGGAGACAGCTGGAGTTGCTGAGAAGGAGAGCGAGGTGGTGTCAGAAG…		ann.char
Amphiphysin	AMPH_CHICK	isogroup12470	1	isotig16859	846	CCCACCCTCCCTATCCCCGCCGCCAGCCATGGCCGACATGAAGACCGGCATCTTCGCCAAAAaCGTCCAGAAGCGCCTCAACCGCGCCCAGGAGAAGGTTCTTCAAAAACTAGGAAAAGCAGATGAAACTAAAGATGAACAGTTTGAAGAATATGTCCAAAATTTCAAACGGCAAGAGGCAGAGGGTTCCAGACTCCAGAGAGAGCTGAGAGGATATTTAGCAGCCATTAAAGGAATGCAAGATGCCTCAAAGAAGCTTACAGAATCTCTCCATGAAGTGTATGAGCCAGACTGGTATGGACGTGAAGATGTGAAAATGATTGGGGAGAAATGTGATGAACTTTGGGAAGACTTCCATCAAAAGCTGGTGGATGGGTCATTGTTAACGCTGGATACATA…		ann.char
Cytosol aminopeptidase	AMPL_XENTR	isogroup05998	1	isotig10387	1848	TGTTCTGGGAgTCTActCTAGTGAAAaGgATGGTGCTGCCCAGTTCACTAGTGCAGGAGATGCTTTTGATAGGCTTGTGTCTGGAAAGCTGAGGGCGCTTCTGTCCCTATGTGGGCCACCTTTGAAGAAAGGCAAAACACGCaTATTTCATGGTTTGCATCAGGACTTTCCAAGTGTGGCAGTAGTTGGCTTGGGTAAGAAGAATGCTGGAATAAATGAACAAGAAAACTGGAATGAAGGCAAAGAAAATATTCGTACAGCTGTTGCAGTTGGCTGCAGGCAGATcCAGGACCTGGAGATCCCTTGTGTGGAAGTAGACCCcTGTGGAGATGCACAgGCAGCTGCAGAAGGTGCTGTCCTTGGATTGCATGAATATAATGAGCTGAAGCAAAAAAaGAA…		ann.char
Aminopeptidase N	AMPN_CHICK	isogroup00757	2	isotig03515	2855	GCCGTGCTTGCTCCAGCGCCGTGTCTGTCAGTGCTGCTCCCGCTGCCACCATGGCAGCCGGCTTCTTCATCAGCAGGACCGTGGGCATCGTGGCCATCGTGCTGGCCGTGGGCGCTGTGGCCACCATCATTGCGCTCTCGGTGGTGTACGCGCAGGAAAAGAACAAGGTGACATCGGATGTGGGCACCACCACCACAGTTAGACCCGGCACCACGGTCAGGCCTGGCACCACGGTTAGACCTGGCGTCACCACCACTGCCACTCCTAATCCCAGCGACCCcTGGAACAGATGGAGGCTACCAGCCACGCTGAAGCCGGAGAGCTACGAGGTGTCTCTGCAGCCCTACCTGACACCCGATGCCAACGGCATGTACATCTTCAAGGGCAACAGCAGCGTGG…	cell-cell signaling [GO:0007267]; peptide catabolic process [GO:0043171]; proteolysis [GO:0006508]; regulation of blood pressure [GO:0008217]; signal transduction [GO:0007165]	ann.char.bf
Aminopeptidase N	AMPN_CHICK	isogroup00757	2	isotig03514	2882	GCCGTGCTTGCTCCAGCGCCGTGTCTGTCAGTGCTGCTCCCGCTGCCACCATGGCAGCCGGCTTCTTCATCAGCAGGACCGTGGGCATCGTGGCCATCGTGCTGGCCGTGGGCGCTGTGGCCACCATCATTGCGCTCTCGGTGGTGTACGCGCAGGAAAAGAACAAGGTGACATCGGATGTGGGCACCACCACCACAGTTAGACCCGGCACCACGGTCAGGCCTGGCACCACGGTTAGACCTGGCGTCACCACCACTGCCACCACTGCCACCACTGCCACCACTGCCACTCCTAATCCCAGCGACCCCTGGAACAGATGGAGGCTACCAGCCACGCTGAAGCCGGAGAGCTACGAGGTGACTCTGCAGCCCTACCTGACACCcGATGCCAACGGCATGT…	cell-cell signaling [GO:0007267]; peptide catabolic process [GO:0043171]; proteolysis [GO:0006508]; regulation of blood pressure [GO:0008217]; signal transduction [GO:0007165]	ann.char.bf
Aminopeptidase O	AMPO_HUMAN	isogroup01627	2	isotig05214	1216	AGAaGAAGAGCTTGTGTATTTAGTCTGAGAGAaGACAAATATTAGAGGCACCACAGCACAGCTGTAATCGGGCTGAAGGACTTTGTGCTCTCGCTAACAGAGTGGAACTGAAATTGCATTTGCACTTCTCCCTGACCAGCTGGTCTTACTTCTGGAGTCCCTCTTGGAGGAGAAGACATTGTGTCCTAAGATACTGCAGTGCTTGGAGAGAACATACAGGCTCCGGGAGCAAGATGCTGAGGTTCGTCATCGGTGGTGTGAACTGGTGATCAAACACAAATATGAGCCTGGGTATGGAGACATTGAGAGATTCCTCAGAGAGGATCAGGCTATGGGTGTGTATCTCTATGGTGAATTAATGGTGAATGAAGATGCAAAACAACAAGAACTTGCACGGAA…	angiotensin maturation [GO:0002003]; peptide catabolic process [GO:0043171]; proteolysis [GO:0006508]	ann.char.bf
Activating molecule in BECN1-regulated autophagy protein 1	AMRA1_HUMAN	isogroup01943	2	isotig05846	933	GCAGAGCGATgAAgAaGTGGAAaTCTCCGTGGaCAGCACAGAGATgCCGCATTATCGCcAGCGCGCTATCCTTCCGTCTCAGCcTGTGAGGCGCACaccccTCCtGCaCAaCTTCCTGCATATGTtGTCCTCCcGCTCCTCTGGCAtACAGGAGGAGAGgACcGTGGgAGTGgTCTTTAACCAGGAGACGGGgCACTGGgAAAGAGTTTACAGCCAGTCGGCTtCAAGCAGACCTGGGAATGTATCACAGGAGGCCTTAAaCCAGGAAATGCCTGAGGAAAGCTCAGAGGAGGATTCACTCAGGAGAAGGTTGCTGGAGTCTTCCcTCATTtCATTATCTCGCTATGATGGTGCAGGATCCCGGgAACATCCAATCTACCCAGATCCAGCCAGGTTGTC…	autophagosome assembly [GO:0000045]; cell differentiation [GO:0030154]; cellular response to starvation [GO:0009267]; macroautophagy [GO:0016236]; macromitophagy [GO:0000423]; mitophagy [GO:0000422]; negative regulation of cardiac muscle cell apoptotic process [GO:0010667]; negative regulation of cell proliferation [GO:0008285]; negative regulation of neuron apoptotic process [GO:0043524]; neural…	ann.char.bf
Activating molecule in BECN1-regulated autophagy protein 1	AMRA1_HUMAN	isogroup01943	2	isotig05845	994	TGAACCGCTGTCGTGCTTGTCATAACCTGCTGACCTTTAACAATGACACGCTGCGCTGGGAAAGAAGCACGCCTAGCTACACACCAGGGcAGGTCCAAAGCACATTtGAGGGTGTGCCTCCAAATACCAGCCAGGTGCAGCCTGCAGAGAGAACCGAGGGCAGAGCTCCTGCCTCTAGCAGACTGCAGCTGGGCAGCTCTTCCACCCCGCAGGAGGAGAGgACcGTGGgAGTGgTCTTTAACCAGGAGACGGGgCACTGGgAAAGAGTTTACAGCCAGTCGGCTtCAAGCAGACCTGGGAATGTATCACAGGAGGCCTTAAaCCAGGAAATGCCTGAGGAAAGCTCAGAGGAGGATTCACTCAGGAGAAGGTTGCTGGAGTCTTCCcTCATTtCATTAT…	autophagosome assembly [GO:0000045]; cell differentiation [GO:0030154]; cellular response to starvation [GO:0009267]; macroautophagy [GO:0016236]; macromitophagy [GO:0000423]; mitophagy [GO:0000422]; negative regulation of cardiac muscle cell apoptotic process [GO:0010667]; negative regulation of cell proliferation [GO:0008285]; negative regulation of neuron apoptotic process [GO:0043524]; neural…	ann.char.bf
Alpha-2-macroglobulin receptor-associated protein	AMRP_MOUSE	isogroup00174	3	isotig01614	1473	GCTGGCGGCCGGCGGCGGCAAGCGGCGGGAGGCCGGGGAGTTCCGTGTGGTGAGGCTGAACCAGGTCTGGGAGAAGGCGCAGCGGCTCCATCTCTCTGCTGTGAAACTaGCAGAGTTGCACAGTGATCTGAAAATACAAGAAAAGGATGAGCTAAGCTGGAAAAAACTGAAGGCTGAAGGGCTGGATGAAGATGGAGAGAAGGAAGCCAAGCTCAGACGTAACTTAAATGTCATTATGACTAAATATGGAATGAATGGGAAGAAGGACTCTCAACTACTTGATACCAACTATATTAAAGATGGCACAGAAAGTGACACACTAGATGATCCAAGACTGGAAAAATTATGGAGCAAGGCCAAGACCTCTGGGAAGTTCTCtGATGAGGAGTTGGACAAGCT…	negative regulation of beta-amyloid clearance [GO:1900222]; negative regulation of protein binding [GO:0032091]; negative regulation of very-low-density lipoprotein particle clearance [GO:0010916]; regulation of receptor-mediated endocytosis [GO:0048259]	ann.char.bf
Alpha-2-macroglobulin receptor-associated protein	AMRP_MOUSE	isogroup00174	3	isotig01613	1496	GCTGGCGGCCGGCGGCGGCAAGCGGCGGGAGGCCGGGGAGTTCCGTGTGGTGAGGCTGAACCAGGTCTGGGAGAAGGCGCAGCGGCTCCATCTCTCTGCTGTGAAACTaGCAGAGTTGCACAGTGATCTGAAAATACAAGAAAAGGATGAGCTAAGCTGGAAAAAACTGAAGGCTGAAGGGCTGGATGAAGATGGAGAGAAGGAAGCCAAGCTCAGACGTAACTTAAATGTCATTATGACTAAATATGGAATGAATGGGAAGAAGGACTCTCAACTACTTGATACCAACTATATTAAAGATGGCACAGAAAGTGACACACTAGATGATCCAAGACTGGAAAAATTATGGAGCAAGGCCAAGACCTCTGGGAAGTTCTCtGATGAGGAGTTGGACAAGCT…	negative regulation of beta-amyloid clearance [GO:1900222]; negative regulation of protein binding [GO:0032091]; negative regulation of very-low-density lipoprotein particle clearance [GO:0010916]; regulation of receptor-mediated endocytosis [GO:0048259]	ann.char.bf
Alpha-2-macroglobulin receptor-associated protein	AMRP_MOUSE	isogroup00174	3	isotig01615	1478	GCTGGCGGCCGGCGGCGGCAAGCGGCGGGAGGCCGGGGAGTTCCGTGTGGTGAGGCTGAACCAGGTCTGGGAGAAGGCGCAGCGGCTCCATCTCTCTGCTGTGAAACTaGCAGAGTTGCACAGTGATCTGAAAATACAAGAAAAGGATGAGCTAAGCTGGAAAAAACTGAAGGCTGAAGGGCTGGATGAAGATGGAGAGAAGGAAGCCAAGCTCAGACGTAACTTAAATGTCATTATGACTAAATATGGAATGAATGGGAAGAAGGACTCTCAACTACTTGATACCAACTATATTAAAGATGGCACAGAAAGTGACACACTAGATGATCCAAGACTGGAAAAATTATGGAGCAAGGCCAAGACCTCTGGGAAGTTCTCtGATGAGGAGTTGGACAAGCT…	negative regulation of beta-amyloid clearance [GO:1900222]; negative regulation of protein binding [GO:0032091]; negative regulation of very-low-density lipoprotein particle clearance [GO:0010916]; regulation of receptor-mediated endocytosis [GO:0048259]	ann.char.bf
Pancreatic alpha-amylase	AMYP_STRCA	isogroup15942	1	isotig20331	553	GATGACTGGTCCTTGAATGTATCTCTGCAGACTGGTCTGCCTGCTGGCACTTACTGCGATGTCATTTCTGGGCAAAaGGAAGGTGACTTCTGTACAGCAGTCCAAGTTCATGTTGCTGCTGATGGCATGGCTAATTTCCTGATTGACAATGAAGATGAAGACCCATTCATTGCAATTCATGTTGATGCTAAATTGTAACCAGATGTGTTGTGCATGTGCTGTTCcTTCTCCTCTGTATCTTTGCTAACAGCAGGCAGATGTGCAGAATGAACCGAGACACAGCAAAGTGTGTCAGCTGTAATACCAATGAAATAGTGAACAGCTGCTGTACAGAGATGGGgACTGGTGGTGCCAGGGCAGATCTGGGAGTGGTGCTGTACATCTGTCTGCATTTGTAAG…	carbohydrate metabolic process [GO:0005975]	ann.char.bf
Pancreatic alpha-amylase	AMYP_STRCA	isogroup05197	1	isotig09586	2116	ACACTGAAGGCACCATGCAGGTCCTCCTCCTCCTCCTGGCAGCTGCAGGGCTGTGCTGGGGGCAGTACAACCCCAACACCCTCCCTAAGAGAAACTCCATtGTGCATCTCTTTGAGTGGCGCTGGCAGGACATTGCTCTGGAGTGTGAGCGCTACTTGGCCCCTAATGGATTTGGAGGAGTTCAGGTTTCACCTCCAAgTGAAAAtATTGTCATTACTAACCCGAACAGACCCTGGTGGGAAAGATACCAGCCCGTTAGCTACAAGCTCTGCACTCGATCAGGAAATGAGGAGGAATTCAGGGACATGGTGACCAGATGCAACAATGTTGGAGTTCATATCTATGTGGATGCTGTGGTCAACCATATGTGTGGGGCTGCTGGTGGCTCAGGTACTCATT…	carbohydrate metabolic process [GO:0005975]	ann.char.bf
Pancreatic alpha-amylase	AMYP_STRCA	isogroup16243	1	isotig20632	520	GTCAaGGAcCATTGACAGATAGTAAGAAGAGCACAGGTGACCACAGAGCACTGGATGGGGATCTATTTTCTGCTGTTAATTGCAGGGCTGTGCTGGGGgCAGTACCACCCcAACACCCTCCcTAAGAGAACCTCCATTGTGCATCTCTTTGAGTGGCGCTGGCAGGACATTGCTCTGGAGTGTGAGCGCTACTTGGCCCCTAATGGATTTGGAGGAGTTCAGATTTCACCTCCCAATGAAAATGTTATCATTACTGAccccAAACAACCATGGTGGGAAAGATACCAGCCTGTCAGCTACAAGCTGTGCACAAGATCTGGCAATGAAACTGAATTTAGAGACATGGTGACCAGGTGCAACAATGTTGGAGTGCACATTTATGTGGATGCAGTGATCAAC…	carbohydrate metabolic process [GO:0005975]	ann.char.bf
Ankyrin repeat domain-containing protein 13A	AN13A_HUMAN	isogroup11291	1	isotig15680	961	GCCGGACCTTGCTGCACTTGGCTGTTTCCTTGGGTTACATAgAATCTGCcAaGGTCCTGCTGCAGCACAAGGCTGATGTGACCAAGGAGAACGCGCAGGGATGGACGGTTTtGCATGAGGCTGTCAGCACAGGGgATCcAGAGATGGTGCAGCTGATCCTGCAGCATCGGGACTACCAGCAGACCTCCACGACCcTCGGAGGAGTTCCTGAGTTACTGCAGAAAaTTAATGAGACTCCTGACTTCTATGTGGAAATGAAATGGGAGTTCACCAGCTGGGTGCCCcTGGTTTCCAGGGTGTGCCCGAGCGACGTGTGCCGCATCTGGAAGAGCCGGGCCAAGCTGCGTGTCGACATCACCTTGCTGGGCTTTGAGAACATGAGCTGGGAGAGGGGCAGGA…		ann.char
Acidic leucine-rich nuclear phosphoprotein 32 family member A	AN32A_BOVIN	isogroup11546	1	isotig15935	938	GGACATGGACATGAAGAAAAGGATCCACTTAGAGCTGCGGAACAGGACGCCCTCAGATGTGAAAGAGCTCGTTCTGGACAACTGCAGGTCGTACGAAGGGAAAATCGAGGGCCTCACGGATGAGTTTGAGGAGCTGGAATTCCTCAGCACAATCAACGTCGGCTTAACCTCAGTTGCAAACTTACCAAAGTTAAACAAACTTAAGAAGCTCGAGCTGAGCGACAACAGAATCTCAGGAGGCCTGGAAGTGTTGGCAGAGAAGTGTCCGAACCTCACGCACCTAAACCTAAGCGGCAACAAAATTAAAGATCTCGGGACAATAGAACCTCTGAAAAAGTTGGAAAACCTGAAGAGCTTAGACCTGTTCAACTGTGAGGTGACCAACTTGAACGACTACAG…	nucleocytoplasmic transport [GO:0006913]; regulation of apoptotic process [GO:0042981]; regulation of transcription, DNA-templated [GO:0006355]; transcription, DNA-templated [GO:0006351]	ann.char.bf
Acidic leucine-rich nuclear phosphoprotein 32 family member B	AN32B_CHICK	isogroup08231	1	isotig12620	1362	GGGGAGCGGCACcGCGAGCGAGCGCAGCGCGGCTCGGGcTCGgCGGaGCGTGAGCGAGCATGGAGATGGAGAGGCGCTTGACGCTGgAGCTGCGCAACAGGAAGCCGAGCGAGGTGAAGGAGCTGGTTCTGGATAACTGTCGCTCAGAGGATGGCAAGGTGGCCGGTCTCTCCTCAGACTTTGAGAACCTGGAGTTCCTCAGCATGATCAACATCAACCTGCTGTCCGTGTCCAACCTCCCCAAGCTCAACAAGCTCCGGAAGCTGGAGCTGAGTGATAATAGGATTTCTGGTGGCCTTGAAGTTCTTGCAGAGAAAACTCCCAACCTGACACACTTGAACCTAAGTGGCAACAAGATCAAAGACATCAATACCCTGGAGCCTTTGAAAAAGTTGCCAA…	histone exchange [GO:0043486]; nucleocytoplasmic transport [GO:0006913]; nucleosome assembly [GO:0006334]; regulation of apoptotic process [GO:0042981]	ann.char.bf
Acidic leucine-rich nuclear phosphoprotein 32 family member E	AN32E_CHICK	isogroup03291	1	isotig07680	3390	CAGCCGCAGCGACCCTCGCGGCcGCCCTCGGCCACCCTCCCTCGTCAGTGCGGAACCGCGGGAGGgggggCGATGGAGATGAAGAAGCGCATCAACCTGGAGTTGCGGAACCGGGCCCCcGAGAAGGTGACAGAGCTGGTGCTCGATAACTGCCGCTCCAGCAACGGGGAGATCGAAGGGCTCAATGACTCCTTCAAGGAGCTCCAGTTCCTCAGCATGGCCAACGTTGAGCTGACGTCGCTGGCCAAGCTGCCCACGCTGAGCAAGCTCCGCAAGCTGGAGCTGAGTGACAATGTCATTTCTGGAGGCCTGGAGGTCCTTGCAGAGAGATGTCCTAATCTCACATATCTAAATCTAAGTGGCAACAAAATCAAAGATCTTGGCACTGTGGAAGCTCTT…	covalent chromatin modification [GO:0016569]; histone exchange [GO:0043486]; nucleocytoplasmic transport [GO:0006913]; nucleosome assembly [GO:0006334]; regulation of apoptotic process [GO:0042981]	ann.char.bf
Anaphase-promoting complex subunit 2	ANC2_MOUSE	isogroup09342	1	isotig13731	1196	ATCTACGgCAGCAAGGaCCtGTTCATCAACGAGTACCGCACGCTGCTGGCTgACAGGCTgCTGCACCAGTTCAACTACAGTGCTGAGAGGGAAATCCGTAaCGTGGAGCTGCTCAaGCTGAGGTTTGGTGAAGCTCAGATGCACTACTGTGAAGTCATGTtAAAaGACATGGCCGACTCACGGCGCATCAACGCCAACATTCGGGATGAGGAGGAGAAGCTCCCTGAGGAGGAGAGGCCTCCCTTCAGCCTCGTGGCTGTCATCCTGTCCAGTGAGTTCTGGCCACCGCTCAAAGAGgAGAAGCTGGAGCTCCCAGAGCAGGTCAAGGAAGCCATGGAAGCATATTCCAAGAaGTATGAGAAATTAAaGGCCATGAGGACCCTGAACTGGAAGTACCAC…	cell cycle [GO:0007049]; cell division [GO:0051301]; positive regulation of axon extension [GO:0045773]; positive regulation of dendrite morphogenesis [GO:0050775]; positive regulation of synapse maturation [GO:0090129]; positive regulation of synaptic plasticity [GO:0031915]; protein K11-linked ubiquitination [GO:0070979]; protein ubiquitination involved in ubiquitin-dependent protein catabolic …	ann.char.bf
Ankyrin repeat and death domain-containing protein 1A	AND1A_MACFA	isogroup02293	2	isotig06546	508	TcAAaCCCGGGgAATGGAAGAAGCTGGCACATTACTGGAAATTCACTGATGACCATGTTAGGGCCATTGAGCAGCAATGGACAGGcAcTAAAAGCTACAGGGAACACGGCCACAGAATGTTGCTGATCTGGCTCCATGGTGTGATCACTGCAGGAGAAAaTCCAATCAaGGGACTGTATGAAGGCCTGGTGGGGATTGGGAGAAGAGATTTAGCAGAAAGTaTCCGGAAAAaagCAAaTGCAGACTCCACCTCTCCACGGAAGTGCACAGCAaTGTAACACCAGTAGCATCCTCAGCCgGTCTCAGAGCTACAGGAGAAACACTTCTCTGCTGCTGAGAAGGCAGATGCAACCTAAGGGCTCCTtCTGGACAGGAAATGACAAGGaTAaAaCAAATGCT…	signal transduction [GO:0007165]	ann.char.bf
Ankyrin repeat and death domain-containing protein 1A	AND1A_MACFA	isogroup02293	2	isotig06545	595	TcAAaCCCGGGgAATGGAAGAAGCTGGCACATTACTGGAAATTCACTGATGACCATGTTAGGGCCATTGAGCAGCAATGGACAGGcAcTAAAAAAGCTTCCCaGGTATTTTCTTTTTTTCCTTGGATTTTGTTTCTAGGCGATAAAGCTGCAGTAGTAACAAAGCATGAAGAAAACCAGTTGGTTTATTTGAAGCAGCCAAAAGATTAGGTTAAAAATTCTGgTTTtACTGAATGTGGAATTACATACACTCTGTAATTTGTCTAGGAATAAAGCATGCAAGCAGGGGAATTATTGGTTCTTTGCTCACTCCTTATGAGACATTTGGCAGGCCTGTGAGCTCTTGCTACAATTCTTGTTCTGTAGTACAGAAGAAaCTTACTTGCTGGTTTtACcTTTT…	signal transduction [GO:0007165]	ann.char.bf
Ankyrin repeat and FYVE domain-containing protein 1	ANFY1_MOUSE	isogroup03023	1	isotig07412	3794	AGATATCAATGTCAGGACCCAGGATGGAGAGACAGCCCTACAGCTGGCCATCCAAAACcAGCTCCCACTGgTGGTGGATGCcATTTGTACCAGGGGAGCAGACATGTCTGTGCCAGATGAGAAAGGcAATCCtCCCTTATGGCTCGCCTTGGAAAACAACcTGGAAGATATTGCATCAACTCTGGTTAGgCATGGCTGTGATGCAACGTGTTGGGGATCAGgACCAGGTGGCTGCTCACAGACCCTTCTCCACAGAGCTATTGATGAGAACAGTGAACAGATTGCTTGCTTCcTtATCcGCAGTGGGTGTGATGTGAaTAGTCCCAGAAaGCcAGGCCCGAATGGAGAAGGAGAAGAGGAAGCCCGTGATGGACAGACACCCcTGCACTtGGCAGCCtG…	endocytosis [GO:0006897]; endosomal vesicle fusion [GO:0034058]; endosome localization [GO:0032439]; Golgi to lysosome transport [GO:0090160]; positive regulation of pinocytosis [GO:0048549]; retrograde transport, endosome to Golgi [GO:0042147]	ann.char.bf
Protein angel homolog 1	ANGE1_HUMAN	isogroup03793	1	isotig08182	2893	TGGAGTTTAGCATGTGATgtAGaGACagTGCcACcAGTGCTCCCAGGCcAgCCcATTcAGGATGCAGTGCCATTTtATCcTgTCCcAaCagAGCTGCCCTACCATGAGAtCTTATGgAGAGACTGGGAGGATCTTtCTGTCCAGCCcTgTgtCTTAGAGCaGgTCTCAAAAAACaCGTCTCtCTTtGAATTTCGAGTCATGTCTTACAACATCCTTGCCcAGGaCcTGGTGGAGCAGGgCCTTGAtCTCTATGTaCACtGTCATCCAGaCATCcTGAaCTGGAACTaCcGCCTtCCAAaCcTTTtGCAGGAGATCCAGCaTTGGGAtCCTGATGTtCtGTGTCTCCAGGAGGTgCAAGaGAACCATTaCTGGGAGCAACtGGAACCAACgTtCAaGGAG…		ann.char
Protein angel homolog 2	ANGE2_BOVIN	isogroup04661	1	isotig09050	2351	caGTatgaaatctgagggagaagAACCACTGACAAAGaaGAGAAGACTCAGTGgCCAGGATGATACTTCAGCTCCTGAACAAGAAACAAACTTGTCTAATCAGAAGGAAGTATCTTGTCTTACTGTAGCACAGAATGAAGAAAAACATGGCAGCAAGAAAGGAACCATCAAAAGACACTGGGAATATTTCTGTCAGCAGAGTAAAACAATGAAAATCGCTGAAAATAAAGGATCTGACCAAAGCAGTACAGGAAGTGAGGCAGCATTTGATTTTACAGTCATGTCCTACAATATTCTCTCACAGAATTTGTTGGAAGACAACTCTCACCTGTACAAACACTGCAGGCAGCGATTATTATTCTGGACATACAGATTTCCCAACATCCTGCAAGAAATCAA…	3'-UTR-mediated mRNA stabilization [GO:0070935]; negative regulation of mitotic cell cycle [GO:0045930]	ann.char.bf
Angiopoietin-related protein 1	ANGL1_BOVIN	isogroup16716	1	isotig21105	455	TGGAGGACTGGAGCAACAAGAAGGTCTATGCAGAGTACAGCAGCTTCCGCCTGgAGCCcGAGAGTGAATTCTACCGGCTGCGCCTGGGCACGTACCAGGGCAACGCCGGGgACTCCATGATATGGCACAATGGAAAGCAATTCACAACACTGGACAGGGACAGGGACATGTATTCAGGAAACTGTGCTCATTTCCACAAGGGCGGCTGgTGGTaCAACGCGTGTGCCCACTCCAACCTCAACGGGGTCTGGTACCGAGGGGGCCACTACAGGAGCAAGTACCAGGATGGAATATTTtGGGCTGAGTACCGGGGggtCGgtaCTCCTTGAAAGCAGTTCaGATGAtGaTCAGACCTATagaCTGAGGAGGAAAaTCCCaCagtGCTCCCATAGAAAATtC…	transmembrane receptor protein tyrosine kinase signaling pathway [GO:0007169]	ann.char.bf
Angiopoietin-related protein 2	ANGL2_HUMAN	isogroup03850	1	isotig08239	2847	GGAGACGCGATTTTAGGAAGTTTTTtGCAGAAGAATATTTGACCAGAACTAGAGGATCATGAtGACAACAAGATTCATCTGTTTAATGCTAGTAACTGTTGTGGGAGTTACTACAAGTGAAACACAGGAATTTGAAGGCAATGACAAGGAAAAGGCTCAAGAATTCATTTATACGAACAGATATAAACGTTCCAGTGACACACAGGACAAATGCACTTACACCTTCATTGTACCTCAGCAGAGAGTGACAGGTGCCATTTGTGTTAATTCTAAGGAGCCTGAAGTTCTGCTTGAAAACAGGGTAAATAAACAAGAATTACAGTTACTTAACAATGAACTTCTCAAACAAAAGAGACAAATAGAAACTCTCCAGCAACTGGTAGAGGTGGATGGTGGAAT…	multicellular organism development [GO:0007275]	ann.char.bf
Angiopoietin-related protein 3	ANGL3_HUMAN	isogroup09127	1	isotig13516	1225	GAAAAGGCTTATACTGGAAGCCTcaGAAAGGAaGATACTACcTGCTCAAGTCAaCCAAAATAATGATCCACCCAACAGACTTAAAAAgCTTTTGACTGAGTGCTCTGCAGTATTTTAACTCAGAACTAACACACTGAACTTTACCACACCAAAGGACTGTGTTACCAACAGATGCCATGTCCCAATCCATGCCCTGCATGGAATTTCTCCAAAACATAAACCTGAGGCATCTGAGATGGTCTTACAAAATGTTTGGTGAGTATTGTCATTCCTTCAAGCCCCAGTGTCAATGTGCTGCAACTTTTcATGGAGgTTTTCCCTCCCAGGATGAAATTTTAATGCCTAGGAGCCAACCTGTCACATATTGGATAATATTGTTTGGGGGAATGGGTTTTCAGg…	acylglycerol homeostasis [GO:0055090]; angiogenesis [GO:0001525]; artery morphogenesis [GO:0048844]; cell-matrix adhesion [GO:0007160]; cholesterol homeostasis [GO:0042632]; cholesterol metabolic process [GO:0008203]; fatty acid metabolic process [GO:0006631]; glycerol metabolic process [GO:0006071]; integrin-mediated signaling pathway [GO:0007229]; lipid homeostasis [GO:0055088]; lipid storage […	ann.char.bf
Angiopoietin-related protein 4	ANGL4_MOUSE	isogroup05786	1	isotig10175	1914	TCCTGGCTGGGCAGCACAGCaGTGGTGTTTTCCAGGTGCAGCCTGCAGGATCTCAGCCCTTCAAGGTGTACTGTGAtATGACTGCAGAGGGTGGCTGGACAGTGATCCAGAGGCGCATGGATGGCTCTGTGGACTTTGACCAGCTCTGGGATGCCTACAAGAATGGCTTTGGAGACCTTCGTGGTGACTTCTGGCTGGGCCTGGAGAAGATACATCACCTTGTCCAAGAGGGAAAATACAATCTCCTGATTGAGCTGGAAGACTGGGAGGGgAATTCCCAGGTGGTTCAGTTTGTCTTCAGTCTTGGTGGTGAGAGCACAGCCTACACACTCAGCCTGGTGGGGCCTCTGTCTGGAGAGCTGGAAAACGCCATTGGGgAATTCAGGCAGCTGCCCTTCT…	angiogenesis [GO:0001525]; cellular response to starvation [GO:0009267]; negative regulation of apoptotic process [GO:0043066]; negative regulation of endothelial cell apoptotic process [GO:2000352]; negative regulation of lipoprotein lipase activity [GO:0051005]; positive regulation of lipid metabolic process [GO:0045834]; protein homooligomerization [GO:0051260]; response to hypoxia [GO:0001666…	ann.char.bf
Angiopoietin-2	ANGP2_PIG	isogroup07351	1	isotig11740	1525	GCACATGGCAGCGGAGCGCTCGGCTGCGCCGCAGGTTAGCTAGGGCCGGGCTCCGGCCAGCGCATCCAGCCTCTCCAGGTCCGCCGAGTCACCGCAGGCATTAAAATGCAGCTGGCCGCCTGCTTCTTCTTGGGCTGCGGCATATTCTTAGCTTCAGGATACAACTCCTTCAGTAAGAGcATGGAGACCATAGGCAAGAAGCAGTACCAGGTTCAGCACGGGTCGTGCAGCTACACCTTCCTCCTGCCCGAGGCGGACAATTGCCGCTCCTCCGCTCCCTACGTGTCCAAcGCCGTGCAGAGGGATGCGCCTCTGGACTATGATGATTCTGTTCAAAGGCTGCAGCTGCTtGAGAACATCATGGAAAAcAaCACTCAGTGGCTAATGAAGcTtgagAaT…	angiogenesis [GO:0001525]; cell differentiation [GO:0030154]	ann.char.bf
Ankyrin-1	ANK1_HUMAN	isogroup09275	1	isotig13664	1205	AGAGAGCCCAGGGCTGGCGGATGACGAAGAGGCTCTCTCGGCCAGAGTCGTCCGCCGGCGCGTCCTGCTGCAGGGGAACGAAGCCCTTCATATCCCTGGAGAGCAGGTGACTGAGGAGCACTTCACCGACGATCAAGGCAATATCATCACCAAGAAGGTCATCCGCAAGGTGGTGCGTCAGCTGAGCCCTGGTGACACGGGTGACAGGCACGAGCAGGAGGAGCTCATTCTGGAGGGCTCCCTGCAGGAGCCCcAAGAGCTGGAGGCTGAGGATGATCACTTCAtGAAATACTCCATCTTGCACCGGGATGGTCTGGGCGCCAAGGATCACACCTCAACACCAAACCACTGAACTTAACACACgTTCTGACACATACCTGAGAAGAGAGGCGAGGAGAG…	cytoskeleton organization [GO:0007010]; ER to Golgi vesicle-mediated transport [GO:0006888]; exocytosis [GO:0006887]; maintenance of epithelial cell apical/basal polarity [GO:0045199]; positive regulation of organelle organization [GO:0010638]; protein targeting to plasma membrane [GO:0072661]; signal transduction [GO:0007165]	ann.char.bf
Ankyrin-1	ANK1_MOUSE	isogroup01358	2	isotig04676	1758	AGGgAGCAGTAATGTCTGAACAGAAGGAATGTAGTGACAGTGACAGTGAGATTGAGAGTGATTCAAGCTCAGAGGAAGAGCAGAGAATTACTACAAGAGTTTACCGACGGCGATTGATTCTGAAGGGTGAGGAAGCAAAAAaCATTCCTGGTGAATCTGTAACAGAGGAACAGTTTACCGACGAAGAAGGCAACgTCATCACAAGAAAAATCACCCGGAAGGTAGTAAGACGTGTTGTTATCCCCCACGAGAGGAAAGTTGGTGAAATGCAGGGAGAAGCTTATAAGGTTAAGACAAAGAAAGAAGTCAGACATGTGGAGAAGAAAAGTTACTCATGAAAGCTGAAAGCCAACCACTGAACGTGTGCTTTTACTGCCAGTATTCTAGAGGGACACTCAC…	ER to Golgi vesicle-mediated transport [GO:0006888]; erythrocyte development [GO:0048821]; iron ion homeostasis [GO:0055072]; monovalent inorganic cation transport [GO:0015672]; porphyrin-containing compound biosynthetic process [GO:0006779]; protein targeting to plasma membrane [GO:0072661]; signal transduction [GO:0007165]	ann.char.bf
Ankyrin-2	ANK2_HUMAN	isogroup06803	1	isotig11192	1642	AAGGAAAAATGCAAACTTCCACCATCGAAACTGCCAAGAAAGCTGGTGGCAAAGACCAAGTCAAAGAGCAGAGCAGCAAAAAGCCAACCGAACCTCTCCCTCCAGTAATAGTTGCTGAAAGTGCCAAAGAAATGGCAGCTGGGAAGGGCAGGACTTGTGAGGATCAGGGAGAACCTGACTTCCAGATCAGCCCTGACAGGAAAACCTCAACAGACTTTTCTGATGTTATTAAAGAAGAACTGGAGGATAATGACAAATACCAGCAGTTTCGACACcTCTCAGTGACAGAGGAGGGAGAGGTTAACTTGGAGCAAGTACTGACCAGTCCTTTTGGTGCTGCTTTTCCCACAGAGTATGGGAAaGATGGATTCCTTCcTGCTCTTTCTCTGCAAaGTGCTG…	atrial cardiac muscle cell action potential [GO:0086014]; atrial cardiac muscle cell to AV node cell communication [GO:0086066]; atrial septum development [GO:0003283]; cellular calcium ion homeostasis [GO:0006874]; cellular protein localization [GO:0034613]; ER to Golgi vesicle-mediated transport [GO:0006888]; membrane depolarization during SA node cell action potential [GO:0086046]; paranodal j…	ann.char.bf
Ankyrin-2	ANK2_HUMAN	isogroup00610	3	isotig03150	4200	GGCAGTCTTCCCGGAAGGCGCGCTCACCAAGAGAATTCGCGTTGGCCTCCAGGCTCAACCTATGCACACTGAACTTACAAAGAAGATTTTGGGCAACAAGGCTACCTTCAGCCCCATAGTcACACTGGAGCCCAGGAGGAGGAAATTCCATAAGCCCATCACGATGACGATCCCCGTGCCCAAGGCCTCCAGTGATGGGCTCATGAAcGGCTATGGAGGCGACACGCCCACTCTAaGGTTACTATGCAGCATAACAGGAGGAACCACCCCTGCCCAATGGGAAGACATCACTGGgACAACACCACTGACATTTGTTAATGAATGTGTTTCCTTCACAACAAATGTGTCTGCCAGATTTTGGTTGATAGACTGTCGTCAGACACAAGAATCTGTTACTTT…	atrial cardiac muscle cell action potential [GO:0086014]; atrial cardiac muscle cell to AV node cell communication [GO:0086066]; atrial septum development [GO:0003283]; cellular calcium ion homeostasis [GO:0006874]; cellular protein localization [GO:0034613]; ER to Golgi vesicle-mediated transport [GO:0006888]; membrane depolarization during SA node cell action potential [GO:0086046]; paranodal j…	ann.char.bf
Ankyrin-2	ANK2_HUMAN	isogroup00610	3	isotig03151	2131	GGCAGTCTTCCCGGAAGGCGCGCTCACCAAGAGAATTCGCGTTGGCCTCCAGGCTCAACCTATGCACACTGAACTTACAAAGAAGATTTTGGGCAACAAGGCTACCTTCAGCCCCATAGTcACACTGGAGCCCAGGAGGAGGAAATTCCATAAGCCCATCACGATGACGATCCCCGTGCCCAAGGCCTCCAGTGATGGGCTCATGAAcGGCTATGGAGGCGACACGCCCACTCTAaGGTTACTATGCAGCATAACAGGAGGAACCACCCCTGCCCAATGGGAAGACATCACTGGgACAACACCACTGACATTTGTTAATGAATGTGTTTCCTTCACAACAAATGTGTCTGCCAGATTTTGGTTGATAGACTGTCGTCAGACACAAGAATCTGTTACTTT…	atrial cardiac muscle cell action potential [GO:0086014]; atrial cardiac muscle cell to AV node cell communication [GO:0086066]; atrial septum development [GO:0003283]; cellular calcium ion homeostasis [GO:0006874]; cellular protein localization [GO:0034613]; ER to Golgi vesicle-mediated transport [GO:0006888]; membrane depolarization during SA node cell action potential [GO:0086046]; paranodal j…	ann.char.bf
Ankyrin-2	ANK2_MOUSE	isogroup00610	3	isotig03149	4556	CATCTGCGCCtttggaGTCAGAGGAGTCAGACATacaaGAACAAGATGCATTGAATTATTCAaCCCcAtCaCCCGAGTCTAGTGATAgATCTGAAGAAATGATGggTGAAGCTgCcAGCGCAGGCACTGCAAAAgCaGATCTtAAATCCAGAATTCCAaTTAAAATGGGTATTtCAGCTTCTTCAAAaTCACCAAAGAAAGAAACCGCTGCCTCTGAAGCTGAGTCCCTCTCCAGAACGGAGGCCGACACGGTCGATAGCAGTCAGGTGCCTTGCCCCATCTCTCCTGAGCAGTGTGCGGTAGAAGATGAGTTAGATTTTTCCAGAGTCACTCGACTGGTtAGTTCTGAACAGGGTGAGGAGTCCCCAGACTCTTCCCCAGAGGAACAGAGATCTGTGA…	atrial cardiac muscle cell action potential [GO:0086014]; atrial cardiac muscle cell to AV node cell communication [GO:0086066]; cardiac muscle contraction [GO:0060048]; cellular calcium ion homeostasis [GO:0006874]; cellular protein localization [GO:0034613]; positive regulation of calcium ion transmembrane transporter activity [GO:1901021]; positive regulation of calcium ion transport [GO:00519…	ann.char.bf
Ankyrin-3	ANK3_HUMAN	isogroup00507	3	isotig02865	2327	ACAGACAAATACCTCGgACCCcAGgATCTgAAaGaGCTGGGAGATGATTCTCTGCCTGCTGAAGGGTACATGGGCTTCAGCCTGGGAGCCCGCTCCGCcAGCCTCCGCTCCttCAGTTCGGATAGGTCCTACACGCTGAACAGGAGCTCCTATGCCCGGgACAGCATGATGATtGAAGAGCTGCTGGTGCCAGCAAAGGATCAGCACCTGACGTTTCAAAGGGAGTTTGATTCTGATTCTCTCAGGCACTATAGCTGGGCTGCAGACACCTTGGACAATGTTAACCTTGTTTCGAGTCCCATCCATTCCGGTTTCCTGGTTAGTTTTATGGTGGATGCACGGGGGgTtCgATGAGGGGCAGTCGGCACCATGGCaTGAgATAATCATCCCGCCACGGAA…	axonogenesis [GO:0007409]; cellular response to magnesium ion [GO:0071286]; cytoskeletal anchoring at plasma membrane [GO:0007016]; ER to Golgi vesicle-mediated transport [GO:0006888]; establishment of protein localization [GO:0045184]; Golgi to plasma membrane protein transport [GO:0043001]; magnesium ion homeostasis [GO:0010960]; maintenance of protein location in plasma membrane [GO:0072660]; …	ann.char.bf
Ankyrin-3	ANK3_HUMAN	isogroup01358	2	isotig04675	2493	GCTTTGTGCCGCCcACCCCTTTCcaCCAGgATGATTTCCTTAGCGACACCTCTAGCCTAGAGTCACCCcTTAGAACTCCCAGTAGACTGAGTGACGTGTTAGTGACCTCCCAGGGACTCGTAGATGGTACAGCAGCAGCACCGCCAGTGGTGACTGAAGAGGACACTTCACTGGATGACAGCAGAATTGATTTCTCAGTGCCTAGAGAAGGAACACCTAAAGATATTTCCATAGGCGAGAGCCAGTTGGAGGAAGTGGACCTTAAAGATTTTCCTCGGTATCTCGGTAGTTATGGCGGGATATCCAGAGATGCTAAACAAAGGCAGAGCGAAGAGACTAGTGAAAGAGGAGTGAGGACTGAACAGCCCGAGAGAGAAAAGTCTGGTACTGATGAGGAGA…	axonogenesis [GO:0007409]; cellular response to magnesium ion [GO:0071286]; cytoskeletal anchoring at plasma membrane [GO:0007016]; ER to Golgi vesicle-mediated transport [GO:0006888]; establishment of protein localization [GO:0045184]; Golgi to plasma membrane protein transport [GO:0043001]; magnesium ion homeostasis [GO:0010960]; maintenance of protein location in plasma membrane [GO:0072660]; …	ann.char.bf
Ankyrin-3	ANK3_HUMAN	isogroup05952	1	isotig10341	1855	AAaCATGTaGCTGGGCACACagATGTACCaTTGCTTAAtGGgTCTGTGtCACCTCTGAAAtACCCATCTCCTGCCAACTtAAtAAATGGAtCCAAaGCTGCAGGtGTTTTtCAAGacAaGaTCTCTGCaGCTGCACATTCTGCAACTTGTGCTGCTAaCGCAGTtGCTGACaCGGCTGAGAGAGTGTTTTCAacAGCTACAaCGATGTCATTTtCTCcaCTCaGGTCATTTGTGTCTtCAGCACCATCAGCTTACCAGTCAATGAGAACTCCTCCTGcAGGtGCTTTGTACACAGCCcTtGGGTCAATATCTGCAACTACcTCATCAGTAACTtCATCAACAaTAACAGTgCCAGTATATTCtGTAGTCAATGTTTTGTCTgaaCCAGCATtAAAgAAG…	axonogenesis [GO:0007409]; cellular response to magnesium ion [GO:0071286]; cytoskeletal anchoring at plasma membrane [GO:0007016]; ER to Golgi vesicle-mediated transport [GO:0006888]; establishment of protein localization [GO:0045184]; Golgi to plasma membrane protein transport [GO:0043001]; magnesium ion homeostasis [GO:0010960]; maintenance of protein location in plasma membrane [GO:0072660]; …	ann.char.bf
Ankyrin-3	ANK3_HUMAN	isogroup05532	1	isotig09921	1990	tagAATACCATGATGATGAGttgTCAGAACTaagaggggagtcttacaggtTTGCTGAGAAAATGCTTCTttcAGaaaagCTAGATGTGTCTCATTCTGATACTGAggaGTCAGttaCTGACCATGCTCTAccccttagtGcagAGttaCAGaggaCTGATAAAcgatacagagAAAAAgTAGCTACTGCccaaccaaaaGAGATTCTCTCcAAAATCTATAAAGATGTATCTGAAAATGGTGTAGGTAAAATGTCTAAGGAGGATCATTATGATAAAGTGACAGTGTTACACTACACTGGAGATGTTAGTAGTCACAAACATGCAATGTGGATGCGCTTTACTGAGGACAGATTAGACAGAGGTAGAGAAAAGTTAATGTATGAAGACAGGGTGGACA…	axonogenesis [GO:0007409]; cellular response to magnesium ion [GO:0071286]; cytoskeletal anchoring at plasma membrane [GO:0007016]; ER to Golgi vesicle-mediated transport [GO:0006888]; establishment of protein localization [GO:0045184]; Golgi to plasma membrane protein transport [GO:0043001]; magnesium ion homeostasis [GO:0010960]; maintenance of protein location in plasma membrane [GO:0072660]; …	ann.char.bf
Ankyrin-3	ANK3_HUMAN	isogroup00507	3	isotig02864	2503	ACAGACAAATACCTCGgACCCcAGgATCTgAAaGaGCTGGGAGATGATTCTCTGCCTGCTGAAGGGTACATGGGCTTCAGCCTGGGAGCCCGCTCCGCcAGCCTCCGCTCCttCAGTTCGGATAGGTCCTACACGCTGAACAGGAGCTCCTATGCCCGGgACAGCATGATGATtGAAGAGCTGCTGGTGCCAGCAAAGGATCAGCACCTGACGTTTCAAAGGGAGTTTGATTCTGATTCTCTCAGGCACTATAGCTGGGCTGCAGACACCTTGGACAATGTTAACCTTGTTTCGAGTCCCATCCATTCCGGTTTCCTGGTTAGTTTTATGGTGGATGCACGGGGGgTtCgATGAGGGGCAGTCGGCACCATGGCaTGAgATAATCATCCCGCCACGGAA…	axonogenesis [GO:0007409]; cellular response to magnesium ion [GO:0071286]; cytoskeletal anchoring at plasma membrane [GO:0007016]; ER to Golgi vesicle-mediated transport [GO:0006888]; establishment of protein localization [GO:0045184]; Golgi to plasma membrane protein transport [GO:0043001]; magnesium ion homeostasis [GO:0010960]; maintenance of protein location in plasma membrane [GO:0072660]; …	ann.char.bf
Ankyrin-3	ANK3_HUMAN	isogroup07660	1	isotig12049	1466	AAGAAAGGAAACACAGCATTGCACATAGCATCCCTCGCTGGACAAGCAGAAGTTGTCAAaGTGTTGGTTACAAATCGGGCCAATGTCAATGCACAGTCTCAGAATGGCTTCACTCCATTATATATGGCAGCCCAaGAAAaCCACCTGGAGGTTGTTAAGTTTCTTCTTGACAATGGTGCCAGTCAAAGCCTTGCCACAGAGGATGGTTTCACACCTTTGGCAGTAGCTTTGCAGCAAGGCCATGACCAGGTGGTTTCCCTGCTGCTGGAAAATGACACAAaGGGAAAaGTCCgCCTTCcTGCCcTtCACATCGcAGCTCGCAaGgACGACACGAaGGCaGCGGCTCTGCTCCTGCAGAATGACCACAATGCTGACGTGGAGTCAAAGAGTGGGTTCACT…	axonogenesis [GO:0007409]; cellular response to magnesium ion [GO:0071286]; cytoskeletal anchoring at plasma membrane [GO:0007016]; ER to Golgi vesicle-mediated transport [GO:0006888]; establishment of protein localization [GO:0045184]; Golgi to plasma membrane protein transport [GO:0043001]; magnesium ion homeostasis [GO:0010960]; maintenance of protein location in plasma membrane [GO:0072660]; …	ann.char.bf
Ankyrin-3	ANK3_HUMAN	isogroup14138	1	isotig18527	697	GGGAGCTTCACCTCACGCCTCTGCCAAGAATGGttACACACCCcTGCACATAGCTGCCAAGAAGAaCCAGATGGACATAGCAACCACGCTGCTGGAATATGGTGCCGATGCCAACGCTGTCACCAGGCAGGGCATCGCCCcTGTGCACCTCGCCTCCCAGGACGGCCACGTGGACATGGTGTCTCTGCTGCTCTCTAGAAaTGCCAATGTCAACCTCAGCAaCAAGAGTGGACTGACACCCCTCCACcTGGCTGCCcAAGAGGACAGGGTCAATGTAGCAGAGGTTCTGGTTAACCAGGGAGCTGCTGTTGATGCACAGACAAAGATGGGATACACTCCTTTGCACGTTGGCTGCCACTATGGAAACATAAAAaTTGTGAACTTCCTTCTGCAaCATTC…	axonogenesis [GO:0007409]; cellular response to magnesium ion [GO:0071286]; cytoskeletal anchoring at plasma membrane [GO:0007016]; ER to Golgi vesicle-mediated transport [GO:0006888]; establishment of protein localization [GO:0045184]; Golgi to plasma membrane protein transport [GO:0043001]; magnesium ion homeostasis [GO:0010960]; maintenance of protein location in plasma membrane [GO:0072660]; …	ann.char.bf
Ankyrin repeat and fibronectin type-III domain-containing protein 1	ANKF1_HUMAN	isogroup16417	1	isotig20806	498	AGGGGCTGCTGGGCATCCAGGACCTGGGGCAGGTCTTCTTCGAGCCCATCAAAGACAAACAGGGCAACATCCTCATCGTCACCCTGAAGGAGGTGAAGACCAGCCAGACCTTCGAGAGCGTCCGCTGGGTGCCCATCTGCAAGCTGCAGAGCAGCCGCAAGTCCGTGTCATCCCCAGAGGAGCCCACTGCTCTGGACATGCTGCTCATCTCCGTCCAGGACAAGCTGGCTTACCACCAGCGGAGCAGCCATGCCCTCTCCCCGGGCcTCTACCTGGGCTACTTGAAGCTGTGCAGTGCcGTGGATCAGATCCGAGTGCTGGTGCCAGAGCAGCTCCCCAACATCCTGTGCCACGTCAAGATTCGCTCCAACCCCAACATCTCCAGGTGGGATTTGCAGG…		ann.char
Progressive ankylosis protein homolog	ANKH_HUMAN	isogroup04589	1	isotig08978	2378	AACTACTGGCCCcTGATCCGGTtCCTGGTCCCTCTCGGCATCACCAACATCGCCATCGACTTCGGggAGCAGGCCTTGAATAGGGgcATTGCTGCTGTCAAGGAAGATGCTGTGGAAATGTTGGCCAGCTATGGGCTGGCATACTCCCTGATGAAGTTCTTCACGGGTCCCATGAGTGACTTCAAAAATGTAGGTCTGGTGTTTGTGAACAGCAAGAGAGACAGGACCAAAGCAGTTTTGTGCATGGTTGTGGCTGGCGCTGTAGCTGCTGTATTTCATACTTTAATAGCATATAGTGATTTGGGGTATTACATTATTAATAAGCTGCACCATGTGGATGAATCAGTGGGAAGTAAAACTCGGAGGGCCTTCCTTTATCTTGCTGCCTTCCCTTTTATG…	locomotory behavior [GO:0007626]; regulation of bone mineralization [GO:0030500]; skeletal system development [GO:0001501]; transmembrane transport [GO:0055085]	ann.char.bf
Ankyrin repeat and KH domain-containing protein 1	ANKH1_HUMAN	isogroup00522	3	isotig02909	1823	TGTCaGCcAGCaGCAGCTCAGGGGGCACCGAGGCaCGCCCGgCGAGCAGCCCcGCACCGCTCAGCAACGCCCAAGATGAAATTCTGCCAACCAGCATGTCTGAGATCAGCCCTTCCATGTCGATGCCTTTTTCATCCAGCTCAGAAACTGCTCCGTTAAGCTTAGCGTCGCCCAGGTCCGTTGTTGCAGATAATCAGGACAACAGTAACTTACCTCAAGTAGCTGTACCAGCACCTCGAGTTACTCACAGGATGCAGTCCAGAGGTTCTTTCTATTCAGTGGTACCAAATGCAAACCTCCATCAAGATCCTCAGTCTATTTTTGTTACAAATCAAGTTCCTTTAACACCTTCTCAAGGTCCACCTGCTGCAGTGCAGCTTTCGTCAGCCATGAACGTTA…	innate immune response [GO:0045087]	ann.char.bf
Ankyrin repeat and KH domain-containing protein 1	ANKH1_HUMAN	isogroup00522	3	isotig02908	1909	TGTCaGCcAGCaGCAGCTCAGGGGGCACCGAGGCaCGCCCGgCGAGCAGCCCcGCACCGCTCAGCAACGCCCAAGATGAAATTCTGCCAACCAGCATGTCTGAGATCAGCCCTTCCATGTCGATGCCTTTTTCATCCAGCTCAGAAACTGCTCCGTTAAGCTTAGCGTCGCCCAGGTCCGTTGTTGCAGATAATCAGGACAACAGTAACTTACCTCAAGTAGCTGTACCAGCACCTCGAGTTACTCACAGGATGCAGTCCAGAGGTTCTTTCTATTCAGTGGTACCAAATGCAAACCTCCATCAAGATCCTCAGTCTATTTTTGTTACAAATCAAGTTCCTTTAACACCTTCTCAAGGTCCACCTGCTGCAGTGCAGCTTTCGTCAGCCATGAACGTTA…	innate immune response [GO:0045087]	ann.char.bf
Ankyrin repeat and KH domain-containing protein 1	ANKH1_HUMAN	isogroup00522	3	isotig02910	870	TGTCaGCcAGCaGCAGCTCAGGGGGCACCGAGGCaCGCCCGgCGAGCAGCCCcGCACCGCTCAGCAACGCCCAAGATGAAATTCTGCCAACCAGCATGTCTGAGATCAGCCCTTCCATGTCGATGCCTTTTTCATCCAGCTCAGAAACTGCTCCGTTAAGCTTAGCGTCGCCCAGGTCCGTTGTTGCAGATAATCAGGACAACAGTAACTTACCTCAAGTAGCTGTACCAGCACCTCGAGTTACTCACAGGATGCAGTCCAGAGGTTCTTTCTATTCAGTGGTACCAAATGCAAACCTCCATCAAGATCCTCAGTCTATTTTTGTTACAAATCAAGTTCCTTTAACACCTTCTCAAGGTCCACCTGCTGCAGTGCAGCTTTCGTCAGCCATGAACGTTA…	innate immune response [GO:0045087]	ann.char.bf
Ankyrin repeat and LEM domain-containing protein 2	ANKL2_HUMAN	isogroup04930	1	isotig09319	2217	AGAGGatgctgAgaaatttgctAAaGGAATTtGTGATTATTTCCCATCTCcAGgCAAGTCCTCTTTATGTTTGTCTCCAGTGAAAGTGGGATCATTtAACAGAGATGGTTTATGCTCCCCTGAGAGTGAGACTGCGAACAAGGAGAGAGCCAACAGCTACAAAAGTCCACGGACTCAGGATCTCACAGCGAAACTTCGGAAAGCTGTTGAGAAAGGAGACACAGCAACGTTTTCAGACCTTATTTGGAGTAACCCTCGTTACCTGATCGGGTCAGGAGACAACCCCACAATCGTACAGGAAGGGTGTAGGTACAATGTCATGCATGTTGCTGCCAAGGAGAATCAGCCTGCTATCTGCCAATTATTGCTGGACACTCTGGAAAATCCGGAGTTTATGCG…	cell division [GO:0051301]; central nervous system development [GO:0007417]; mitotic nuclear envelope reassembly [GO:0007084]; negative regulation of apoptotic process [GO:0043066]; negative regulation of phosphorylation [GO:0042326]; positive regulation of protein dephosphorylation [GO:0035307]; regulation of catalytic activity [GO:0050790]	ann.char.bf
Ankyrin repeat domain-containing protein 1	ANKR1_CHICK	isogroup06072	1	isotig10461	1822	AGAGCTGGCCTGAGCCCTGGGAGGTTTCAGCCCTACGGGAGCACAGCCTTCGACACAGCAAACATGACGATGATGATGAAGGTAGAAGAGCTGGTGACTGGGAAGAAGGTGGATGAAAAAGAGACTGGCAGCTTCCTCCCTGAGGACTTCAAAAACGGAGAGTATGAAGCTGCTGTCAGATTAGAGAAGCAGGAGGACCTAAAGACCATCCCTGAGCACTCACTGACCCGAGGAGATCTGGCTCATGAGAATGAGAAAAGaCTAGAAGCAGAGCTGAAGAAGAAGAAATTACAGGCCAGGTCAAAACTTGAAAACTTGGAGGATCTTGAAAAAATTATTGAGCTGAAGAAGAAGAAAAGATGCAAGAAAGTGAAAGTGCCTGTTTTAAAGAAACCTGAA…	cellular response to growth factor stimulus [GO:0071363]; myoblast differentiation [GO:0045445]; negative regulation of apoptotic process [GO:0043066]; negative regulation of gene expression [GO:0010629]; positive regulation of gene expression [GO:0010628]; positive regulation of myoblast proliferation [GO:2000288]; post-embryonic development [GO:0009791]; regulation of cell cycle [GO:0051726]; r…	ann.char.bf
Ankyrin repeat domain-containing protein 9	ANKR9_HUMAN	isogroup13789	1	isotig18178	727	TGGCCTGCGAACTGGTGCGGCCCGAGTGCCTGCTGCTGCTGCTGGGGCACGGCGCGTCCCCCTGCCTGCAGGACAGTGCTGGCAACACCCCCcTCGACACCcTGCTGCAGCAGATCTCCCACTTGCCCgCaGCCAACATGCGTGCCAAGCTCCTCTGCCTCGACTGCCTCTTCTTCTTCGTGCCTCAGGACCTCAAGTTTGCAATGAAACAGCAACTGTTGGACAACCGGCAGCAGTGGCAGGACCTCCTGGGGgAGAACAGGTTCCAGTGCCTGGTGGGCTTAGTGCCTCCATCGCTGTTTGTCAGAGCCATGCGTGTCTTGATCAGGACCATTGCACCTGAGCACTTCCCAGAGGCTCTGGATAATCTGCCTCTGCCTCATTTTCTAAAGCCTTTGG…	post-translational protein modification [GO:0043687]	ann.char.bf
Ankyrin repeat and SAM domain-containing protein 6	ANKS6_HUMAN	isogroup09225	1	isotig13614	1213	TCCTTCATCTACTGTGTCAGATTtGCAGTGTGCTCAGATTGTTGGCAATGgACATGTTaTAAAGCAAAAaCTGGAGATGAACAAAaGACCTCCATCTGGGACTTCATCTACATCTAAAAGTACATCTCCAACTCTCACACCATCTCCATCACCTTCCCcATCTCcTAaGGTTCAAAaTgCAGAGTCTtCTGTCtCTtCTTCTCaCAGACACGCCAAGAGCAACGGCTCCAGCAGTGGTACTATTACAGAGGATGGCAaCcACTTggTGGACCATCAACAGCTTGGGCCACTTCTGAGAGACAGTGATGTAGAGAATCATGAAaGACAAAaCCATATGAGAGTAAAaGAAGGCTCTGAAaGCTTGGAGAAAGATGAGCTGACTGGCATCCTTAAAAAATT…		ann.char
[truncated: 21,409 more rows]
